# Supplementary material for: Physiological intron retaining transcripts in the cytoplasm abound during human motor neurogenesis
Source: Genome Res. 2022 Oct;32(10):1808–25. doi: 10.1101/gr.276898.122 (PMC9712626; doi:10.1101/gr.276898.122)
Supplement: Supplemental Material [file supp_gr.276898.122_Supplemental_Tables_S1_to_S35.xlsx]

## Sheet: Table_Legends
SUPPLEMENTAL TABLES 1-34 can be accessed here.
Table S1 | Description of the iPSC lines used in this study. Related to Figure 1A.
Table S2 | List of the 4490 nuclearly detained retained introns reported on Figures 1F,H,J.
Table S3 | List of the 3633 cytoplasmic retained introns reported on Figures 1F,H,J.
Tables S4-S12 | Lists of the 9 groups of retained introns (N1, N2 N3, C1, C2, C3, C4, C5, C6 respectively) associated with the distinct spatiotemporal dynamics during MN differentiation reported on Figure 2A.
Tables S13-S17 | Frequency and enrichment in 133 RBPs crosslink events in 5 defined regions of interest (R1, R2, R3, R4, and R5, respectively) related to Figures 2B-D.
Table S18 | List of primer sequences used in this study for RT-qPCR.
Table S19 | List of antibodies, their applications and concentrations used in this study.
Table S20-28 | Non-curated list of Gene Ontology Biological Pathways enriched in the genes exhibiting intron retention with specific dynamic over time (N1-N3 and C1-C6, respectively) related to Supplemental Figure S2A.
Table S29 | Pair-wise Tukey’s post hoc comparisons related to Figure 3B.
Tables S30-S34| Differential gene expression analysis of the TargetScan predicted target genes of mir-4519, mir-1976, mir-4716-5p, mir-485-5p, mir-4267 respectively.
Table S35 | Frequency and enrichment of 133 RBPs crosslink events across the full set of introns associated with the 9 individual groups of retained introns related to Figures 3C-E.

## Sheet: Supplemental_Table _S1
iPSC cell line	Mutation	Age of the donor	Age at disease onset	Sex of the donor
CTRL1	None	78	n/a	Male
CTRL3	None	unknown	n/a	Female
CTRL4	None	51	n/a	Female
CTRL5	None	51	n/a	Male
MUT1	R155C	43	40	Female
MUT2	R155C	43	40	Female
MUT3	R155C	43	40	Female
MUT4	R191Q	42	36	Male

## Sheet: Supplemental_Table_S2
GENE	EVENT	COORD	LENGTH	FullCO	COMPLEX	0_MUT3_cyto	0_MUT3_nuc	0_MUT4_cyto	0_MUT4_nuc	0_CTRL1_cyto	0_CTRL1_nuc	0_CTRL3_cyto	0_CTRL3_nuc	0_CTRL4_cyto	0_CTRL4_nuc	0_CTRL5_cyto	0_CTRL5_nuc	0_MUT1_cyto	0_MUT1_nuc	0_MUT2_cyto	14_MUT3_cyto	14_MUT3_nuc	14_MUT4_cyto	14_MUT4_nuc	14_CTRL1_cyto	14_CTRL1_nuc	14_CTRL3_cyto	14_CTRL3_nuc	14_CTRL4_cyto	14_CTRL4_nuc	14_CTRL5_cyto	14_CTRL5_nuc	14_MUT1_cyto	14_MUT1_nuc	14_MUT2_cyto	14_MUT2_nuc	22_MUT3_cyto	22_MUT3_nuc	22_MUT4_cyto	22_MUT4_nuc	22_CTRL1_cyto	22_CTRL1_nuc	22_CTRL3_cyto	22_CTRL3_nuc	22_CTRL4_cyto	22_CTRL4_nuc	22_CTRL5_cyto	22_CTRL5_nuc	22_MUT1_cyto
AACSP1	HsaINT0000144	chr5:178766176-178767129	954	chr5:178767130-178767335=178764863-178766175:-	IR-S	55.56	66.67	100	100	100	88.73	100	92.86	100	84.47	84.62	72.09	100	94.03	100	42.86	100	50	47.83	77.14	66.36	100	77.78	82.46	80.77	65.71	83.33	100	80	45.45	68.42	100	72.73	77.78	76.47	78.12	67.06	87.1	88.89	80.58	75.29	74.55	68.42	100
AADAT	HsaINT0000169	chr4:170069231-170070586	1356	chr4:170070587-170070652=170069148-170069230:-	IR-S	50	88.68	0	94.74	28.57	93.75	11.11	100	55.56	94.63	21.74	91.67	23.08	100	25	78.95	95.83	51.22	89.19	25.71	89.74	18.18	88.57	39.13	100	42.86	81.82	51.02	91.3	52.38	96.43	26.09	72.09	20.75	71.43	25.71	64.29	40	77.14	46.67	83.78	30	62.96	22.58
AARS2	HsaINT0000255	chr6:44307395-44310298	2904	chr6:44310299-44310443=44307249-44307394:-	IR-C	5.45	53.49	5.88	22.4	6.67	29.28	7.89	49.09	4.17	35.67	11.54	60	2.56	35.14	28.21	25	60	22.73	72.55	10.53	50.35	24	57.89	33.33	58.56	15.56	55.84	11.63	38.24	7.14	53.85	28.21	45.45	20.83	46.03	19.48	27.03	14.29	25	27.66	36.84	16.28	46.24	21.74
AASDH	HsaINT0000282	chr4:56345291-56349262	3972	chr4:56349263-56350058=56345127-56345290:-	IR-C	13.51	58.33	17.65	62.5	25	44.44	0	33.33	5.26	44.44	27.27	45.45	10.2	44.44	22.22	33.33	60	16.67	37.5	23.81	44	25	55.56	21.74	21.43	52.94	20	20	42.86	7.14	29.41	33.33	28.57	27.27	52.94	29.41	50	60	42.86	25	14.29	0	33.33	27.27
AASDH	HsaINT0000284	chr4:56342967-56343561	595	chr4:56343562-56343684=56342835-56342966:-	IR-S	8.57	31.03	5.88	5.26	9.09	37.5	7.32	25.93	3.7	30.61	6.67	33.33	11.11	33.33	12	42.86	20	30.43	54.55	18.18	69.23	33.33	12.5	4	15	14.29	38.46	23.81	33.33	6.67	27.78	25	60	15.79	43.75	100	53.85	0	55.56	20	46.67	45.45	25	33.33
ABCA7	HsaINT0000824	chr19:1042398-1042745	348	chr19:1042315-1042397=1042746-1042826:+	IR-C	42.86	90.8	7.69	92.59	33.33	96.64	36.36	98.21	60	95.77	27.27	97.8	33.33	81.82	38.46	100	84	27.27	100	0	91.67	41.67	97.1	11.11	88.57	75	96.3	42.86	88.68	60	79.49	56.76	94.17	91.67	92.98	74.47	91.26	62.5	96.13	52.94	95.53	62.16	93.14	57.89
ABCB10	HsaINT0000931	chr1:229549435-229558135	8701	chr1:229558136-229558695=229549234-229549434:-	IR-S	0	27.27	2.86	4.76	0	22.22	40	5.88	6.67	0	0	0	0	0	0	9.09	28.57	15.79	16.67	5	14.29	11.11	33.33	0	3.03	5.88	14.29	0	13.33	13.04	6.67	11.76	7.14	4	14.29	12	15.79	26.53	10	20	11.11	29.41	13.04	9.43
ABCB6	HsaINT0001038	chr2:219214499-219214960	462	chr2:219214961-219215082=219214389-219214498:-	IR-S	1.96	51.43	0	58.24	3.51	52.63	2.27	60.87	1.3	55.28	1.54	62.86	2.86	53.95	2.33	7.25	68.37	15.25	80.41	12.5	66.99	18.75	69.9	0	61.94	4.55	65.11	1.75	69.67	4.35	70.27	31.91	68.97	37.5	74.49	23.68	73.83	41.94	86.52	27.27	77.59	36.17	72.13	9.68
ABCB6	HsaINT0001039	chr2:219214187-219214388	202	chr2:219214389-219214498=219214121-219214186:-	IR-S	0	58.62	1.12	57.89	0	54.59	0	59.18	2.22	49.02	1.23	57.23	5.49	58.94	5.38	8.64	78.45	15.25	83.14	14.29	67.88	18.92	67.06	18.37	66.12	9.68	67.05	6.52	69.12	6.9	71.06	28	52.89	9.09	65.22	25	69.13	19.15	63.64	22.73	75.73	22.45	72.91	10.26
ABCC10	HsaINT0001130	chr6:43434849-43435750	902	chr6:43434621-43434848=43435751-43435907:+	IR-C	11.76	69.57	10.71	61.45	6.67	62.5	27.27	81.4	3.45	70.11	7.14	60.61	18.52	75.86	20	26.67	78.18	16.13	60.71	11.11	63.49	20	63.04	15.38	39.13	18.92	55.56	9.09	68.42	14.29	47.37	15.91	51.22	32.08	51.06	35.29	62.71	23.23	65.71	31.71	59.22	20.51	72.88	20.79
ABCC10	HsaINT0001136	chr6:43443160-43443932	773	chr6:43442970-43443159=43443933-43444010:+	IR-S	17.24	71.88	5.26	74.74	11.63	84.42	7.14	77.08	33.33	74.26	13.04	80.43	0	87.1	30.43	16.67	85.32	31.25	88.12	23.81	87.17	45.45	83.82	9.09	79.17	5.88	70.69	23.08	88.89	20	73.68	29.11	72.31	34.25	74.4	38.03	64.38	43.33	70.24	43.59	75.72	17.65	67.91	25.58
ABCC5	HsaINT0001296	chr3:183984895-183985303	409	chr3:183985304-183985378=183983753-183984894:-	IR-C	28	94	45.45	88.79	42.86	96.75	69.23	100	81.82	94.87	76.47	94.06	76.47	83.13	62.5	63.16	89.66	70.37	88.24	77.14	87.69	85.71	98.06	87.1	89.61	83.61	91.89	70.21	91.84	68.89	100	79.89	89.34	77.25	91.34	71.23	91.76	85.96	89.74	80.56	89.43	85.71	96.54	78.08
ABCD1	HsaINT0001437	chrX:153729413-153736111	6698	chrX:153729232-153729412=153736112-153736254:+	IR-S	12.5	66.67	37.5	42.86	22.58	50	40	60.98	15.38	77.14	11.11	62.16	29.41	69.23	15.38	40.74	57.89	25	50	38.46	34.38	4.55	56.52	0	71.43	23.08	64.71	30	63.64	30.43	28.57	8.47	26.32	6.98	26.32	0	8	6.38	27.27	1.96	31.25	14.29	15.79	2.56
ABCD4	HsaINT0001482	chr14:74289520-74290026	507	chr14:74290027-74290118=74289483-74289519:-	IR-S	6.83	65.43	9.32	74.78	2.05	68.69	10.26	75.14	3.86	76.42	14.38	79.2	5.37	63.94	17.54	22.57	75.34	33.17	80.72	12.61	63.49	18.28	60.9	15.59	61.51	17.88	64.02	14.83	63.66	24.59	72.47	11.54	46.19	16.57	60.18	16.61	58.56	10.09	49.8	14.76	49.93	14.32	61	8.94
ABCD4	HsaINT0001483	chr14:74288766-74289482	717	chr14:74289483-74289519=74288716-74288765:-	IR-S	4.11	81.99	3.13	81.91	15.07	80.85	18.25	87.78	10.94	75.09	11.98	88.13	7.8	83.73	24.47	38.54	92.74	45.71	87.44	29.59	86.37	26.04	83.67	45.45	74.07	25.58	80.22	27.62	85.52	45.26	89.63	34.5	60.19	15.88	62.9	29.62	67.2	22.47	60.07	20.45	63.42	17.76	62.14	15.95
ABCD4	HsaINT0001484	chr14:74288260-74288715	456	chr14:74288716-74288765=74288207-74288259:-	IR-S	5.49	54.85	8.64	47.02	6.12	56.29	15.07	59.42	9.38	58.45	9.8	54.03	6.02	55.48	5.62	46.94	86.06	36.67	76.36	24.55	70.46	34.08	74.22	24.44	71.25	25.66	65.1	29.03	77	28.93	82.5	16	65.88	26.13	62.34	31.37	61.57	28.95	60.78	22.31	61.43	15.49	66.72	13.16
ABCD4	HsaINT0001487	chr14:74286530-74286700	171	chr14:74286701-74286816=74285277-74286529:-	IR-S	15.44	29.4	12.13	20.59	15	27.99	11.63	16.28	21.49	37.69	12.92	20.52	16.3	30.79	12.66	5.26	11.64	9.52	14.1	10.53	17.54	22.61	23.96	27.43	33.15	20	22.45	10.69	14.74	13.17	10.9	43.88	50.71	33.1	46.52	45.51	40.28	56.52	53.13	50	54.05	47.65	53.52	39.2
ABCD4	HsaINT0001488	chr14:74298070-74300149	2080	chr14:74300150-74300268=74297930-74298069:-	IR-C	15.15	48.48	0	52.27	9.68	50.92	18.18	41.24	2.7	50.48	4.76	49.47	8.7	28	15	21.95	50.24	41.18	59.12	20	48.76	22.35	52.32	20	39.68	13.21	56.41	11.11	50.86	25.49	48.67	33.33	46.84	40	70.83	27.27	70.21	35.71	79.1	10	60.47	28.57	60.71	17.65
ABCD4	HsaINT0001489	chr14:74296450-74297929	1480	chr14:74297930-74298069=74296333-74296449:-	IR-S	5.56	26.32	3.77	36.08	0.99	35.32	5.38	36.04	10.11	46.99	7.27	33.78	6.56	26.09	14.04	21.95	39.51	21.84	45.65	7.38	35.75	24.64	47.95	13.68	34.83	4.46	34.27	12.86	36.7	15.79	35.26	13.33	46.19	28.74	49.55	17.74	48.65	24.75	46.6	20	43.86	18.84	43.41	12.61
ABCD4	HsaINT0001492	chr14:74293249-74295147	1899	chr14:74295148-74295198=74293154-74293248:-	IR-S	6.25	71.68	12.9	85.34	8.94	85.35	30.3	92.52	3.77	77.73	19.02	90.3	9.09	78.27	22.95	43.69	91.78	38.46	95.16	47.69	92.15	42.72	90.01	35.35	81.45	32.1	89.18	38.46	86.92	47.27	92.4	38.78	80.68	56.83	87.3	54.33	91.83	50	84.25	48.61	89.06	52.15	84.66	42.86
ABCD4	HsaINT0001493	chr14:74292870-74293153	284	chr14:74293154-74293248=74292748-74292869:-	IR-S	7.78	73.6	15.99	84.89	9.63	85.4	22	83.49	7.36	72.93	16.89	84.49	10.08	74.84	20.96	41.66	85.13	41.04	91.64	31.95	86.9	49.1	88.37	26.51	86.35	36.81	88.57	34.94	84.56	50.02	88.65	44.07	82.97	57.01	85.55	48.51	87.83	56.56	88.39	38.73	86.87	49.29	90.7	47.25
ABHD11	HsaINT0001633	chr7:73737392-73737561	170	chr7:73737562-73737735=73737221-73737391:-	IR-C	19.15	82.22	29.82	71.88	25	81.13	13.51	83.1	5.88	88	30	90.77	11.11	71.96	23.81	14.29	100	13.33	48.72	28	75.44	9.09	77.78	15.79	80	20	48.15	28.57	61.54	24.14	48.15	29.73	45.45	41.18	80.65	23.08	52.94	17.07	56.52	22.58	62.96	45.45	53.33	21.95
ABHD14B	HsaINT0001665	chr3:51970185-51971459	1275	chr3:51971460-51971698=51969943-51970184:-	IR-C	7.32	24.24	2.94	44.93	12.5	43.4	3.85	35.71	11.48	73.33	20.75	42.17	11.11	55.29	12.2	3.03	10.53	10.14	20.55	10.81	21.65	18.64	47.06	10.2	31.34	23.08	25.27	11.11	21.52	4.11	12.2	27.27	44	25	46.15	20	45.83	33.33	9.09	37.5	50	53.85	61.9	27.27
ABHD14B	HsaINT0001666	chr3:51969606-51969942	337	chr3:51969943-51970184=51968510-51969605:-	IR-S	16.67	50	18.64	50	15.79	45.45	11.76	50.94	17.24	52.11	15.56	40.21	10.11	49.25	21.95	5.08	25	8.47	32.08	13.64	41.98	25	26.92	17.65	54.72	6.67	27.5	11.11	36.99	9.57	17.24	36.36	33.33	33.33	45.45	37.5	61.29	66.67	25.93	33.33	72.73	33.33	46.67	12.5
ABL2	HsaINT0001806	chr1:179108899-179109207	309	chr1:179109208-179109441=179099327-179108898:-	IR-S	61.54	100	73.91	91.3	69.23	64.71	76	69.23	68.42	46.67	47.62	69.23	66.67	83.33	61.29	82.61	93.94	77.27	100	85.71	88.57	80.33	60	85.37	77.78	83.33	100	68.42	91.3	70.83	92	92	66.67	92.31	71.43	66.67	100	85.71	80	84.62	83.33	80.65	55.56	82.61
ABLIM1	HsaINT0001816	chr10:114453484-114465697	12214	chr10:114465698-114465827=114453379-114453483:-	IR-C	50	100	0	100	8.33	33.33	40	100	0	66.67	20	100	9.09	100	7.69	22.22	100	20	33.33	20	30	10	50	17.65	42.86	7.69	33.33	17.65	66.67	9.09	66.67	5.79	6.67	1.89	0	4.76	13.04	1.61	7.14	2.86	7.69	0	3.23	1.1
ACAD10	HsaINT0002088	chr12:111745044-111746143	1100	chr12:111744643-111745043=111746144-111746284:+	IR-S	12.5	49.09	40	28.33	23.08	42.86	42.86	54.55	50	51.16	46.67	62.75	38.46	38.46	26.32	85.71	70.91	64.71	88.89	55.56	70.18	40	71.43	22.22	43.75	60	63.27	50	52.38	68.42	89.74	16.67	70	26.32	39.53	5.88	47.06	24.14	37.93	28.57	40	17.24	23.94	38.46
ACAD10	HsaINT0002089	chr12:111746285-111747048	764	chr12:111746144-111746284=111747049-111747186:+	IR-S	0	34.88	10	26.15	0	31.2	9.09	42	4	26.03	0	48.72	33.33	42.17	16.13	18.18	66.67	21.95	66.67	42.86	62.35	33.33	52.69	29.41	50.94	27.78	48.98	31.58	48.78	18.37	83.33	18.75	36.11	25.71	16.07	20	35.59	4.48	36.23	8.57	13.04	31.03	38.24	23.81
ACAD10	HsaINT0002092	chr12:111748476-111749172	697	chr12:111748317-111748475=111749173-111749345:+	IR-C	14.29	45.95	10	28.12	11.11	60	30	47.37	7.69	45.26	23.81	51.58	38.46	49.43	54.55	40.54	45.71	28.57	34.65	26.83	52	15.15	40.98	20	36.36	25	53.57	38.46	47.5	38.46	33.33	23.81	32.08	16.67	32.26	9.09	43.59	21.74	35.85	29.03	26.09	15.15	39.47	36.36
ACAD10	HsaINT0002093	chr12:111749346-111753771	4426	chr12:111749173-111749345=111753772-111753915:+	IR-S	33.33	71.68	37.93	48.72	45.45	56.78	52.94	69.78	55.56	53.85	58.33	75	37.78	66.18	57.89	48.39	78.76	53.85	70	47.62	79.31	43.75	84	50	61.17	50	68.33	47.62	61.67	50	67.92	33.33	72.31	74.19	60	66.67	87.23	43.59	68.42	35.48	67.24	36.59	67.57	72.73
ACAD11	HsaINT0002109	chr3:132578882-132579491	610	chr3:132579492-132579558=132578796-132578881:-	IR-S	25	97.75	40	97.18	31.03	89.93	60	96.33	30	94.84	27.27	95.51	47.83	92.23	58.97	28.4	89.47	44.83	66.67	46.15	83.53	38.46	86.05	38.46	88.57	44.83	75.51	34.83	93.85	18.84	61.4	40	62.5	23.08	63.64	75	50	28.57	88.89	14.29	61.9	12.5	60	25
ACAD8	HsaINT0002129	chr11:134259746-134261043	1298	chr11:134259608-134259745=134261044-134261179:+	IR-C	10.74	78.95	11.81	77.24	10.84	88.99	10.18	78.72	10.17	75	12.86	83.44	13.6	74.24	12	30.77	89.74	33.33	83.53	31.34	83.61	35.9	96.43	23.33	76.47	32.77	85.71	35	86.96	23.08	83.61	21.28	59.57	21.35	52	30.84	56.1	27.1	50	13.46	64.29	22.33	63.11	21.84
ACAD9	HsaINT0002133	chr3:128880018-128884652	4635	chr3:128879490-128880017=128884653-128884746:+	IR-C	0	69.23	53.85	55.56	50	70	53.85	100	33.33	70.73	14.29	67.57	71.43	81.82	66.67	40	67.74	29.41	56.76	70	76	71.43	77.36	61.9	67.57	36.84	37.5	23.08	75	53.85	68.42	29.41	78.95	46.67	100	46.67	36.84	83.33	68	50	80	39.13	61.29	50
ACADS	HsaINT0002172	chr12:120737136-120737355	220	chr12:120736986-120737135=120737356-120737467:+	IR-S	0	77.14	12.5	67.74	6.67	68	10	84	7.69	74.36	30	81.25	9.09	88.24	18.52	7.41	68.89	10.45	81.82	15.79	76.7	23.4	84	33.33	60	10.59	69.7	7.46	57.75	4.44	64.18	30.43	70.83	33.33	83.33	28	87.88	27.27	93.94	69.23	82.61	20	80	10
ACADVL	HsaINT0002189	chr17:7220047-7220121	75	chr17:7219834-7220046=7220122-7220197:+	IR-S	20.75	12.78	10.2	12.39	16.28	13.08	6.67	10.77	7.69	15.97	11.11	16.83	18.52	5.3	10.17	22.94	21.61	4.76	30.16	11.32	22.65	21.69	36.62	11.26	22.84	33.33	24.57	22.45	32.37	14.81	28	35.55	37.93	41.07	36.81	36.47	36.74	42.27	40.67	32.08	41.61	45.71	42.09	46.77
ACADVL	HsaINT0002190	chr17:7222866-7223132	267	chr17:7222667-7222865=7223133-7223237:+	IR-S	11.95	93.17	9.52	94.03	10.75	92.64	11.3	95.38	15.12	93.62	10.12	94.39	11.29	95.85	24.93	18.75	83.1	17.24	86.81	16.72	91.6	16.85	92.33	16.91	87.6	12.47	92.04	14.08	86.75	17.33	80.11	25.25	90.45	37.5	91.91	24.04	91.02	26.4	92.17	29.23	92.41	28.65	91.17	17.5
ACADVL	HsaINT0002206	chr17:7222082-7222176	95	chr17:7221952-7222081=7222177-7222302:+	IR-S	6.74	61.53	3.12	64.08	8.42	71.41	3.91	55.67	7.53	71.54	4.92	71.06	5.63	62.08	10.45	9.27	64.25	10.64	71.86	10.78	72.04	9.48	74.15	6.51	74.51	7.3	73.43	7.46	69.85	15.88	59.51	18.64	75.9	35.14	77.72	18.06	75.38	14.29	79.55	15.32	78.77	11.8	81.19	7.45
ACAP1	HsaINT0002238	chr17:7350055-7350126	72	chr17:7349945-7350054=7350127-7350237:+	IR-S	0	30.99	0	21.8	0	20	2.27	33.94	1.96	28.57	1.75	33.33	2.44	31.15	0	80	100	100	100	100	100	100	87.5	100	100	100	77.78	100	100	33.33	100	100	100	100	20	100	100	14.29	0	100	100	100	100	100
ACAP1	HsaINT0002241	chr17:7351000-7351294	295	chr17:7350950-7350999=7351295-7351474:+	IR-S	2.04	22.12	0	15.09	2.44	15.25	4.35	27.59	0	21.95	1.89	21.52	0	16	0	22.22	66.67	50	42.86	30.43	36.84	23.08	75	50	50	25	100	25	63.64	18.18	50	23.08	62.5	20	33.33	36.36	50	14.29	28.57	15.79	40	14.29	46.67	13.04
ACAP3	HsaINT0002272	chr1:1298680-1299344	665	chr1:1299345-1299356=1298567-1298679:-	IR-C	0	58.82	100	77.37	7.69	67.82	6.67	77.81	100	71.74	6.67	76.62	2.33	75.74	2.78	1.32	71.89	1.75	70.17	6.28	76.91	1.44	67.4	4.55	65.45	5.77	67.18	8.41	69.12	3.62	78.42	1.78	48.41	3.85	47.35	4.79	54.54	2.97	49.71	0.46	51.8	4.95	52.65	1.87
ACAP3	HsaINT0002274	chr1:1298114-1298369	256	chr1:1298370-1298421=1298013-1298113:-	IR-S	8.33	57.05	15.15	58.41	6.25	56.87	7.69	67.06	11.11	53.43	5.88	62	33.33	48.55	22.22	28.09	85.86	8.82	83.94	12.24	74.97	11.11	69.94	5.08	66.82	13.04	71.19	17.86	81.43	27.54	78.63	3.55	41.26	3.26	43.23	5.31	58.13	2.87	48.22	2.21	42.66	2.39	44.59	2.2
ACAP3	HsaINT0002282	chr1:1303282-1304085	804	chr1:1304086-1304143=1303162-1303281:-	IR-S	15.79	54.11	18.52	60.54	19.05	63.4	22.22	62.94	6.67	58.04	28	48.7	7.69	56.57	10.64	21.74	66.76	14.04	71.92	13.7	65.49	20	71.83	11.63	67.66	6.47	63.71	4.55	65.19	11.76	65.51	17.18	71.61	18.52	76.51	13.38	70	14.89	74.33	15.93	73.58	15.63	71.42	8.51
ACBD4	HsaINT0002324	chr17:45136621-45136691	71	chr17:45136500-45136620=45136692-45136776:+	IR-S	33.33	31.15	12	31.03	22.58	46.48	6.67	30.61	5.26	47.37	5.26	36.99	12.2	33.33	4	9.52	15.79	16.67	36.84	12.5	38.71	41.18	30.77	46.67	38.46	28.57	31.71	5.88	28.57	16.13	26.83	55.56	30	42.86	33.33	22.22	44.83	9.09	81.82	45.45	47.83	20	46.67	52.38
ACBD5	HsaINT0002330	chr10:27240485-27240673	189	chr10:27240674-27240879=27240319-27240484:-	IR-C	25.71	0	21.21	52.94	16.28	69.23	17.46	41.18	70.59	25	44.83	46.67	25	73.33	15.79	14.29	40.74	38.71	51.02	11.76	47.83	45.56	76	32.47	57.14	35.48	38.46	17.46	28	13.25	11.76	36	52	36.15	88.89	33.33	39.39	35.86	39.73	44.3	65.96	38.6	33.33	44.13
ACD	HsaINT0002433	chr16:67659420-67659536	117	chr16:67659537-67659613=67659375-67659419:-	IR-S	0.78	56.19	0	51.39	0	63.64	1.03	59.09	4.27	67.16	2.94	63.16	0	71.74	1.33	28	72.92	16.67	81.97	15.29	80.78	14.29	87.5	13.58	76.15	13.46	82.08	13.73	85.45	7.27	80.39	14.29	78.15	27.41	79.11	20.41	74.89	38.64	84.21	31.53	76.76	16	76.55	18.87
ACD	HsaINT0002434	chr16:67659264-67659374	111	chr16:67659375-67659419=67659229-67659263:-	IR-S	1.54	69.52	3.09	70.7	0.92	64.46	4.65	62.69	1.67	59.61	0	65.28	4.59	67.35	5.08	20.45	82.86	16.08	84.34	17.81	86.6	23.46	86.97	32.99	87.89	20.86	85.14	14.93	84.98	14.69	80.67	37.69	87.09	33.33	87.19	28.57	80.96	43.35	83.97	25.22	87.61	28.71	89.91	19.6
ACD	HsaINT0002435	chr16:67659080-67659228	149	chr16:67659229-67659263=67658928-67659079:-	IR-S	1.72	71.15	0	59.02	1.03	62.7	1.96	60.26	1.8	63.58	3.54	73.63	6.34	66.44	4.91	7.89	79.7	16.92	88.64	14.94	80.37	21.48	85.88	28.57	82.18	18.21	73.66	17.07	83.77	28.57	76.74	15.66	84.23	33.13	82.41	15.87	75.7	25.85	81.47	20.75	78.47	32.14	81.67	16.9
ACER3	HsaINT0002501	chr11:77015118-77016674	1557	chr11:77015016-77015117=77016675-77016779:+	IR-C	0	81.82	16.67	33.33	4	20	42.86	40	4.76	38.46	12.5	60	5.26	100	10	22.58	11.11	20	27.27	0	41.18	18.52	75	7.14	0	0	0	20	33.33	6.67	80	17.24	42.86	11.11	100	4	25	27.27	27.27	28.57	11.11	4	100	0
ACHE	HsaINT0002505	chr7:100891339-100892333	995	chr7:100892334-100892818=100891169-100891338:-	IR-S	24.32	24.14	37.5	31.43	40	27.66	26.32	19.48	41.67	11.11	33.33	33.33	33.33	11.93	19.05	76	28.89	63.64	33.33	20	38.78	10.2	17.89	36	21.43	5.26	15	58.33	30.43	57.89	21.74	1.58	5.36	7.23	6.63	2.26	3.68	2.47	4.2	2.99	5.34	2.86	6.77	3.97
ACHE	HsaINT0002506	chr7:100891089-100891168	80	chr7:100891169-100891338=100889994-100891088:-	IR-C	15.38	18.92	20	23.4	16.67	42.11	11.11	33.33	40	38.46	14.29	18.37	11.11	21.84	1.96	20	31.58	11.11	30.77	25	28.21	26.32	45.68	33.33	39.13	0	42.86	27.27	25.58	22.22	26.09	15.79	70	50	62.16	29.41	60	33.33	58.62	33.33	50	23.08	57.45	5.88
ACIN1	HsaINT0002514	chr14:23069618-23071426	1809	chr14:23071427-23071570=23069476-23069617:-	IR-C	35.42	81.4	42.57	64.6	38.13	69.23	34.09	56.99	28	68.12	43.4	81.58	49.4	75	40.54	43.24	59.18	26.53	52.14	25.19	47.45	31.87	60.53	47.13	59.72	31.58	54.01	28.3	54.1	20.93	52.69	16.44	37.29	27.06	32.47	18.86	43.75	20.27	31.54	20.7	38.55	22.06	44.66	15.15
ACIN1	HsaINT0002517	chr14:23066009-23069475	3467	chr14:23069476-23069617=23065966-23066008:-	IR-S	15.18	61.85	15.7	51.03	15.83	69.17	28.18	68.59	14.47	70.95	26.19	37.59	27.44	68.18	27.75	38.57	44.94	44.59	43.84	43.17	43.5	46.88	59.19	45.82	47.61	36.73	48.42	45.37	51.62	39.76	52.67	35.31	54.68	44	62.06	42.38	51.16	27.13	55.56	27.27	62.94	33.53	61.79	28.11
ACOT8	HsaINT0002657	chr20:45843722-45844262	541	chr20:45844263-45844420=45843527-45843721:-	IR-S	5.81	54.72	13.21	44.9	7.78	44.19	7.96	70.3	6.42	58.97	11.23	63.48	9.57	52	10.45	27.66	52.94	27.54	48.39	15.66	56.32	20.59	84.13	11.11	43.4	16.46	46.43	12.5	83.33	10.81	50	11.56	35.59	22.22	33.33	13.83	35.19	14.41	40	12	21.85	13.38	30	12.43
ACP6	HsaINT0002760	chr1:147650239-147652448	2210	chr1:147652449-147652549=147650143-147650238:-	IR-S	10.11	61.74	4.11	59.42	19.05	80.39	27.66	61.11	14.29	80	16.67	63.46	12	65.22	21.52	35.85	66.67	38.1	57.58	23.81	60.98	11.76	48.84	17.65	47.17	14.67	67.16	14.89	46.48	40	70.15	60	0	0	42.86	33.33	42.86	9.09	33.33	14.29	33.33	12.5	41.18	22.22
ACP6	HsaINT0002762	chr1:147647567-147648245	679	chr1:147648246-147648411=147647366-147647566:-	IR-S	19.44	50.44	14.75	46.48	15.79	60.87	14.71	55.32	25	54.93	22.39	63.83	10.34	56.52	16.36	30	73.13	20.93	71.01	31.82	49.43	22.58	56.52	48.84	67.21	31.91	67.44	33.33	66.27	40.3	58.14	83.33	70.37	77.78	62.5	41.18	41.18	75	100	11.11	75	44.44	66.67	75
ACRBP	HsaINT0002793	chr12:6647013-6647323	311	chr12:6647324-6647414=6646794-6647012:-	IR-S	22.22	22.22	4.35	37.5	17.65	80	5.26	27.27	20	50	17.65	44	12.5	36.36	13.04	0	15.79	11.11	15.38	20	39.29	33.33	100	20	74.19	14.29	47.37	14.29	40	4.35	40	77.78	100	84.62	95.12	33.33	88.89	60	100	100	100	100	100	0
ACTN1	HsaINT0003165	chr14:68878524-68879961	1438	chr14:68879962-68880108=68878458-68878523:-	IR-C	35.68	73.97	20.89	62.41	15.12	84.18	36.08	86.57	27.76	78.76	42.75	91.31	26.66	70.59	31.45	100	100	100	100	100	97.23	100	95.72	100	100	100	100	100	100	100	100	100	100	100	100	100	100	100	100	100	100	100	100	100
ACTN1	HsaINT0003166	chr14:68877241-68878457	1217	chr14:68878458-68878523=68877082-68877240:-	IR-C	20.93	93.04	29.05	89.36	42.37	89.73	41.88	86.73	41.85	87.48	33.7	88.7	46.23	92.68	50.53	100	100	100	100	100	100	100	100	100	100	100	100	100	97.26	100	100	100	100	100	77.96	29.02	100	100	100	100	92.44	100	100	71.9
ACTN4	HsaINT0003233	chr19:38709477-38710256	780	chr19:38709395-38709476=38710257-38710342:+	IR-S	4.44	32.75	4.96	30.85	12.26	42.08	6.43	43.17	12.79	49.41	10.97	51.9	7.83	26.22	12.87	37.25	69.28	17.65	70.68	32.69	73.2	31.18	69.04	34.78	71.96	44.58	68.89	27.43	64.15	17.43	67.08	49.15	67.35	60.87	63.38	65.22	85.71	45	81.4	43.66	78.51	54.84	70.29	44.44
ACTN4	HsaINT0003234	chr19:38710343-38714468	4126	chr19:38710257-38710342=38714469-38714561:+	IR-S	8.62	47.99	10.91	38.43	10.65	51.89	14.43	61.29	16.52	56.4	15.13	57.32	14.82	41.75	13.27	29.03	75	26.8	76.59	28.21	77.63	35.37	78.04	48.76	68.09	30.77	73.53	34.29	70.49	29.49	73	41.94	71.25	51.28	68.75	43.48	78.03	51.28	76.96	43.9	80.59	47.37	71.88	29.87
ACTR1B	HsaINT0003263	chr2:97658644-97658878	235	chr2:97658879-97659003=97658427-97658643:-	IR-S	27.5	94.95	14.75	89.6	10.43	86.24	12.66	92.17	24.69	92.03	9.72	93.5	25.76	95.65	38.93	16.29	83.58	14.85	77.27	16.1	78.63	18.6	84.64	15.72	70.91	16.01	74.41	26.71	84.62	15.53	77.71	21.24	76.12	17.28	59.84	14.38	60.66	18.92	76.29	18.58	60.66	16.31	69.55	22.57
ACTR5	HsaINT0003311	chr20:38765519-38766237	719	chr20:38765402-38765518=38766238-38766377:+	IR-S	13.33	63.64	4.76	40	11.48	41.94	4	37.21	10.77	44.26	8.05	62.5	10.77	53.85	11.86	22.22	64.71	17.65	23.53	12.28	23.64	7.14	58.62	17.95	26.92	22.45	30.43	20.63	66.67	27.27	50	0	76.47	15.15	20	18.92	33.33	10.34	20	20	26.67	14.29	35.29	11.63
ADAM11	HsaINT0003502	chr17:44779240-44779738	499	chr17:44779222-44779239=44779739-44781846:+	IR-S	100	100	100	100	100	100	100	100	100	100	100	100	100	100	100	100	84.96	100	97.25	100	94.14	100	86.29	100	91.37	77.81	86.63	100	89.3	100	94.03	61.96	77.36	49.03	68.13	72.58	66.31	69.19	70.13	44.88	52.08	30.23	59.51	34.58
ADAM15	HsaINT0003543	chr1:155060833-155062244	1412	chr1:155060763-155060832=155062245-155062369:+	IR-C	2.78	95.89	19.54	93	0	95.33	0	93.64	100	100	13.93	94.07	8.85	93.96	15.74	20.45	88.78	37.78	96.36	45.43	94.55	39.31	94.38	67.79	92.96	35.7	98.88	14.78	85.79	20.28	84.4	49.28	93.68	49.28	100	40.48	96.26	42.15	100	54.84	97.22	2.78	88.23	5.72
ADAM17	HsaINT0003568	chr2:9490519-9491100	582	chr2:9491101-9491151=9489282-9490518:-	IR-C	4	30.61	8.77	15.62	2.7	25.49	4.65	31.15	2.86	18.18	2.33	31.03	0	20	1.89	42.31	73.71	63.83	78.48	17.5	53.38	9.26	44	3.45	27.5	14.58	54.43	16.19	50	42.31	75.32	17.39	27.66	7.69	18.18	24	40.91	4.35	13.85	7.69	15	7.41	25.42	10.53
ADAM23	HsaINT0003684	chr2:206596163-206609909	13747	chr2:206596051-206596162=206609910-206610000:+	IR-S	10.5	43.01	12.5	69.23	20	59.38	18.22	55.56	30	79.58	27.27	60	22.68	26.86	53.98	19.45	73.4	66.77	68.48	35.2	55.39	40.23	40.06	19.29	56.59	47.87	47.37	38.97	66.32	38.74	64.81	9.09	14.29	100	100	25.07	33.33	45.55	60	11.11	42.86	17.85	29.49	41.57
ADAM23	HsaINT0003685	chr2:206610001-206617578	7578	chr2:206609910-206610000=206617579-206617955:+	IR-S	20	69.89	39.39	73.33	48.15	64.71	30.43	76.81	26.32	81.82	40.74	90.91	23.53	54.67	43.75	71.43	77.78	44	95.45	76	84.62	100	87.88	39.39	72.73	63.64	89.47	48.72	75	73.33	69.57	85.71	80.95	80	73.33	41.18	50	40	83.33	20	64.71	14.29	66.67	30
ADAMTS10	HsaINT0003897	chr19:8596220-8596306	87	chr19:8596307-8596412=8596073-8596219:-	IR-S	33.33	60.95	20	70.91	10.53	73.62	31.25	64	57.89	68.7	25.93	67.47	50	76.12	33.33	55.56	65.38	64.71	68.42	47.37	69.4	45.95	74.9	36.84	79.31	50	68.14	29.41	70.67	62.5	68.89	22.3	58.38	31.13	67.46	25.66	68.1	33.33	72.63	25.58	68.86	27.43	69.74	26.19
ADAMTS10	HsaINT0003900	chr19:8592104-8592762	659	chr19:8592763-8592870=8591958-8592103:-	IR-C	57.14	35.38	100	50.82	46.15	33.33	50	55.56	16.67	36	38.46	30.23	100	36	50	20	30.77	11.11	32.56	5.26	32.54	9.09	27.97	6.67	27.89	18.52	23.36	45.45	31.51	26.32	51.11	13.73	29.74	7.8	24.19	14	29.44	14.89	28.21	6.94	20.57	6.77	24.7	9.76
ADAMTS10	HsaINT0003903	chr19:8589586-8589888	303	chr19:8589889-8589991=8589452-8589585:-	IR-S	0	62.01	25.56	66.58	18.52	42.61	0	61.99	33.33	69.57	30.16	60.95	61.4	76.53	11.11	0	71.49	9.09	44.54	20.96	58.88	17.24	45.24	11.11	51.26	34.65	51.24	51.47	47.31	0	68.95	1.15	48.04	5.56	47.98	9.39	38.58	5.6	45.92	5.93	52.53	3.45	44.36	4.64
ADAT1	HsaINT0004435	chr16:75622465-75623237	773	chr16:75623238-75623323=75622403-75622464:-	IR-S	42.86	100	52	42.86	57.14	71.43	63.64	100	55.56	83.33	77.78	75	38.46	100	71.43	55.56	100	100	50	71.43	100	30.43	14.29	50	53.85	52.38	100	58.33	100	57.14	38.46	54.55	100	62.5	42.86	48.15	20	42.86	100	83.33	66.67	36	66.67	100
ADAT1	HsaINT0004436	chr16:75600349-75603084	2736	chr16:75603085-75603171=75598349-75600348:-	IR-S	21.21	71.43	7.14	33.33	17.07	50	33.33	84	18.37	28.3	31.25	84	18.18	83.33	13.04	18.37	63.64	45.45	58.33	42.11	65	55	52.38	18.37	40	41.38	38.46	17.07	82.61	26.53	63.64	17.65	70	22.03	43.75	45.1	42.86	21.74	60	27.66	41.18	27.66	47.37	20
ADCK1	HsaINT0004470	chr14:77907920-77924456	16537	chr14:77907803-77907919=77924457-77924606:+	IR-C	2.38	52.38	11.11	31.71	9.33	43.48	7.69	36.17	8	35	15.79	77.78	13.25	70.21	12.73	46.15	71.43	33.33	67.57	9.52	55.93	6.98	50	11.54	23.81	11.11	29.41	30	77.78	21.74	61.7	6.38	27.27	11.76	41.18	6.67	27.27	12.82	9.68	3.03	33.33	5.88	33.33	7.69
ADCK2	HsaINT0004479	chr7:140690814-140694662	3849	chr7:140690760-140690813=140694663-140695108:+	IR-S	4.92	50	15.15	64.71	2.04	27.27	14.29	100	9.09	40	20.93	23.81	4.17	14.29	10.2	25	43.75	21.31	45.95	12.12	47.06	11.43	30.77	25	33.33	23.08	30.43	12.64	36.84	42.03	35.14	2.33	21.21	33.33	15.79	9.38	12.2	7.69	12	13.64	40.74	13.51	25	28.21
ADCK5	HsaINT0004518	chr8:144390747-144390855	109	chr8:144390671-144390746=144390856-144391056:+	IR-S	0	62.09	0	61.02	10	68.7	7.69	58.42	5.88	45.1	7.69	60.36	0	59.62	41.18	9.09	52.94	33.33	56.94	0	64.71	33.33	53.33	23.08	54.17	0	58.02	42.86	48.39	0	52.48	34.38	71.14	52.38	68.47	38.1	54.72	37.5	67.32	14.89	75	28.57	72.33	35
ADCK5	HsaINT0004522	chr8:144391712-144391782	71	chr8:144391580-144391711=144391783-144391866:+	IR-S	12.5	70.45	0	87.34	16.67	100	50	88.89	14.29	79.17	14.29	83.05	23.81	92.96	37.5	47.37	89.19	16.67	85.71	41.18	79.38	51.35	81.82	50	87.65	17.65	83.72	36.84	68.89	75	80	51.11	66.48	41.46	70.24	24.44	74.74	35	70.91	39.39	68.71	36.17	65.26	39.13
ADCK5	HsaINT0004523	chr8:144391867-144391940	74	chr8:144391783-144391866=144391941-144392022:+	IR-C	11.11	39.13	27.27	26.92	0	48.57	4.76	48.84	0	34.78	10	30.43	0	36.23	28.57	12.5	45.45	27.27	41.38	2.86	22.92	3.7	34.18	15.79	21.88	5.26	21.74	11.11	42.86	41.67	41.46	8.57	24.56	2.44	14.96	9.09	23.4	4.76	24.79	7.69	19.23	7.69	21.48	14.29
ADCY3	HsaINT0004604	chr2:24828162-24830708	2547	chr2:24830709-24830825=24827902-24828161:-	IR-S	6.98	26.19	11.76	23.08	2.56	20.88	5.26	28.97	4.76	39.29	12.5	37.25	6.98	34.55	4.76	22.45	37.23	23.94	44.07	24	38.32	12.2	42.47	20	31.34	9.8	39.2	22.22	25.81	9.09	35.09	10	46.67	18.75	40.74	9.09	16.67	17.39	27.78	5.26	39.29	8.82	28.4	15.38
ADCY3	HsaINT0004606	chr2:24826127-24827545	1419	chr2:24827546-24827608=24826045-24826126:-	IR-S	0	13.62	0	34.31	18.32	9.28	34.65	27.34	19.59	8.72	24.75	6.25	40.33	4.55	0	0	10.07	25	27.14	23.32	34.07	39.04	13.31	1.82	28.46	41.18	32.17	32.2	17.61	36.2	6.58	49.3	17.43	0	3.23	0	0	41.42	0	9.68	28.69	25.88	15.24	4.55
ADCY3	HsaINT0004611	chr2:24820849-24821516	668	chr2:24821517-24821640=24820724-24820848:-	IR-C	36.36	20.81	25	25.89	26	21.02	12.5	25	20	16.67	10.14	20.65	12.5	27.43	15.07	41.07	32.17	34.04	33.61	38.03	30.22	52.94	29.41	34.96	37.58	32.47	29.89	29.2	36.04	32.14	37.09	6.9	30.43	19.23	23.46	33.33	37.25	18.37	19.19	21.95	24.77	30.43	22.64	20.69
ADCY3	HsaINT0004613	chr2:24820115-24820723	609	chr2:24820724-24820848=24819170-24820114:-	IR-C	51.85	95.02	38.36	90.32	38.61	88.42	43.24	94.07	42.57	94.33	42.57	94.95	42.5	95.56	47.92	66.9	90.44	56.02	91.23	51.89	92.15	66.94	89.87	52.54	75.76	58.92	82.07	53.33	83.13	63.98	81.36	43.59	81.67	65.71	64.91	44.09	83.7	39.47	72.37	47.25	73.48	47.25	83.81	38.84
ADCY6	HsaINT0004677	chr12:48778258-48782570	4313	chr12:48782571-48783438=48778108-48778257:-	IR-S	23.81	32.35	14.29	31.87	2.13	35.21	0	38.71	0	33.33	0	33.33	33.33	23.08	4.55	12.33	34.4	5.62	38.93	5.88	36.47	8.51	41.51	16.92	43.09	17.65	38.06	14.29	31.79	3.23	23.16	16.56	58.27	20	51.55	10.4	32.57	23.88	43.33	14.29	40.96	13.7	47.76	14.86
ADD1	HsaINT0004759	chr4:2926113-2928170	2058	chr4:2926014-2926112=2928171-2930062:+	IR-C	5.53	84.22	11.18	73.23	13.13	83.04	8.51	86.88	7.44	80.73	13.56	82.19	10.88	84.16	16.95	19.37	57.63	18.77	53.07	15.21	63.56	19.32	72.95	15.44	45.21	14.98	61.65	17.34	58.65	19.84	53.78	54.95	96.59	63.06	92.43	100	96.36	71.5	90.76	15.18	85.28	28.95	86.86	54.92
ADD3	HsaINT0004796	chr10:110130487-110133325	2839	chr10:110130363-110130486=110133326-110135565:+	IR-C	100	100	100	100	49.28	100	100	100	100	100	100	100	100	100	100	100	100	100	89.2	100	100	100	100	70.83	100	32.69	100	100	100	66.02	100	100	100	49.28	100	100	100	13.93	100	24.46	43.73	17.23	66.02	0
ADIPOR2	HsaINT0004891	chr12:1691192-1754257	63066	chr12:1691081-1691191=1754258-1754514:+	IR-S	27.07	0	37.96	44.3	34.16	70.47	32.31	70.47	28.46	54.4	61.4	28.46	20.96	0	31.25	34.08	47.23	31.69	27.07	34.98	35.62	50.45	29.49	37.68	48.84	27.07	31.25	29.88	38.96	29.79	46.67	42.72	38.89	42.48	24.14	49.86	47.62	44.3	49.86	30.65	38.89	46.46	38.89	39.42
ADRBK2	HsaINT0004988	chr22:25709965-25711067	1103	chr22:25709898-25709964=25711068-25711163:+	IR-C	3.85	18.18	2.44	15.38	2.86	14.29	3.7	55.56	1.75	13.51	8	50	5.88	42.86	9.68	13.21	52.69	23.64	51.02	8.05	44	9.68	39.13	4.76	16.67	11.83	37.14	4	39.39	16.13	56.16	2.7	28.57	7.46	50	13.04	40	16.67	16.67	0	22.22	11.63	9.09	7.69
ADSSL1	HsaINT0005037	chr14:104743192-104744811	1620	chr14:104743067-104743191=104744812-104744909:+	IR-S	7.32	77.14	20	92.86	12.28	92.5	17.95	93.55	0	93.55	10.34	91.06	13.33	94.2	18.92	26.53	92.31	28.4	88.61	23.53	84.5	5.66	82.35	7.41	65.93	23.4	69.37	23.53	86.49	15.22	86.46	0	47.37	0	36.84	0	73.33	3.7	83.33	12	57.89	23.08	66.67	4
AFAP1L2	HsaINT0005129	chr10:114296069-114296977	909	chr10:114296978-114297100=114294824-114296068:-	IR-S	29.41	87.5	40	65.22	0	68.42	11.11	100	25	66.67	18.18	100	4.76	75	46.67	77.78	100	41.18	91.67	6.67	76.47	23.08	80	9.09	56.25	50	60	9.09	83.33	60	90	20	54.55	8.33	81.82	21.74	60	64.71	48.15	11.3	62.5	9.8	65.62	8.57
AFG3L1P	HsaINT0005227	chr16:89978879-89980241	1363	chr16:89978810-89978878=89980242-89980336:+	IR-C	11.76	55.22	15.79	47.54	14.29	54.76	33.33	71.43	14.29	55.84	5.88	79.49	25	81.82	50	67.44	72.73	88.24	75	31.15	60	32.14	53.85	18.64	38.1	32	40	39.13	54.55	70	77.78	9.68	47.06	12	25	11.63	53.85	18.75	31.58	6.38	42.11	18.92	48.39	25.71
AFG3L1P	HsaINT0005230	chr16:89984600-89988851	4252	chr16:89984531-89984599=89988852-89988951:+	IR-C	33.33	86.28	59.7	100	63.45	94.67	69.83	90.67	78.4	89.22	100	96.79	85.06	80.08	85.21	91.22	89.34	79.09	80.88	74.05	82.31	76.07	84.25	77.04	84.62	76.56	83.15	76.47	85.72	83.56	80.79	40.37	78.1	74.65	71.88	74.69	68.19	72.64	85.57	66.6	93.67	60.44	73.69	53.92
AFMID	HsaINT0005273	chr17:78204901-78205092	192	chr17:78204828-78204900=78205093-78205190:+	IR-S	100	92.55	80	88.61	72.41	92.13	54.84	79.51	85.71	92.31	81.82	90	71.43	91.78	58.82	66.67	76.92	100	100	83.33	89.66	50	85.71	100	100	50	87.5	85.71	88.24	100	100	100	100	100	100	100	100	100	100	100	100	100	100	100
AFTPH	HsaINT0005298	chr2:64579547-64585421	5875	chr2:64579486-64579546=64585422-64585545:+	IR-C	7.69	77.78	5.56	20	0	22.22	0	25	20	25	27.27	0	2.33	27.27	8.33	15.38	10	9.68	20	18.52	28	12.82	69.23	25	66.67	27.27	29.41	6.98	17.65	30.43	27.27	28.57	36.36	39.13	21.43	16.13	27.27	5.88	36.84	11.11	36.84	11.11	37.5	12.5
AGBL5	HsaINT0005481	chr2:27067647-27068631	985	chr2:27067494-27067646=27068632-27068744:+	IR-S	23.08	33.33	20	33.33	38.46	50	52.38	33.33	33.33	33.33	14.29	66.67	23.81	80	39.13	7.94	11.76	10.71	18.92	15.25	21.74	15.79	38.46	11.11	20	14.29	19.05	10.71	14.29	16.42	16.67	33.33	41.18	16.67	33.33	29.03	46.67	21.05	33.33	29.41	25.93	24.14	33.33	31.25
AGBL5	HsaINT0005482	chr2:27068745-27069572	828	chr2:27068632-27068744=27069573-27069706:+	IR-S	8.7	55.56	11.11	45.45	7.41	50	2.33	33.33	6.12	75	4.35	55.56	4.35	62.5	0	3.9	24.53	3.09	11.48	7.32	40.3	7.25	35.48	11.36	24.44	3.9	25.49	5	29.11	3.23	6.49	28.57	53.85	30.43	40.54	25	30.43	33.33	40	31.25	46.67	20	21.21	46.15
AGPAT4	HsaINT0005604	chr6:161153500-161154148	649	chr6:161154149-161154310=161153346-161153499:-	IR-S	18.42	81.36	16.67	76.99	24.37	70.69	39.78	87.78	24.71	86.89	20	83.02	18.52	81.2	27.1	20.83	75.32	28.36	72.16	24.59	76.22	30.56	86.1	25.66	68.59	21.21	79.78	31.09	71.28	29.13	63.93	31.56	67.27	28.75	63.16	31.29	53.39	31.09	56.44	27.37	60	25.38	62.25	27.74
AGPAT5	HsaINT0005609	chr8:6708888-6724869	15982	chr8:6708357-6708887=6724870-6724939:+	IR-S	3.16	33.33	2.22	20	2.63	20	0	16.67	6.67	16.13	5.13	27.27	6.06	55.56	5.26	26.09	81.82	20.93	70.37	18.18	52.63	18.37	57.89	24.44	21.74	9.09	60	10.2	42.86	26.76	71.43	11.11	50	33.33	57.14	25	63.64	12	25	16.67	60	14.29	40	7.32
AGTPBP1	HsaINT0005720	chr9:85655201-85657434	2234	chr9:85657435-85657643=85655143-85655200:-	IR-S	45.45	83.33	72.22	72.73	70.73	83.33	55.56	73.33	68.63	91.67	68.25	75	55.56	100	73.33	52	64.29	56.25	33.33	55	63.16	35.29	60	42.86	47.37	40.98	44.44	48.57	43.75	49.3	65.22	52.54	50	42.86	53.85	71.43	63.64	66.04	55.56	56.25	47.37	78.72	44.83	57.89
AGTRAP	HsaINT0005758	chr1:11745838-11746126	289	chr1:11745803-11745837=11746127-11746223:+	IR-C	34.78	77.78	59.77	82.14	44.16	75.52	40.23	70.83	34.78	83.24	29.49	76.65	44.44	82.06	28.07	38.46	82.14	55.97	83.87	51.52	79.59	70.59	100	100	67.21	39.02	82.04	53.12	71.63	29.29	67.74	100	100	100	75.31	28.57	75	100	79.59	72.97	70.59	31.03	47.37	42.31
AHCYL1	HsaINT0005861	chr1:110020852-110021673	822	chr1:110020731-110020851=110021674-110023742:+	IR-S	3.07	76.42	4.42	61.72	5.65	55.38	1.79	66.26	4.85	72.01	6.83	47.79	6.78	80.45	4.69	17.73	70.82	13.64	68.09	12.19	52.62	17.91	67.94	18.57	45.68	11.08	48.68	12	66.56	18.53	59.04	11.91	57.43	27.8	55.86	16.11	50.02	18.24	52.79	31.27	34.96	14.02	62.21	16.64
AHI1	HsaINT0005899	chr6:135300559-135318518	17960	chr6:135318519-135318616=135300500-135300558:-	IR-C	11.11	80	50	60	14.29	63.64	20	100	33.33	25	9.09	80	0	100	14.29	25	63.64	42.86	81.82	42.86	82.61	12.5	77.78	31.03	100	30	100	9.68	53.85	33.33	68.42	33.33	71.43	27.27	25	20	100	14.29	55.56	20	42.86	100	75	16.67
AHSA2	HsaINT0005969	chr2:61185619-61186445	827	chr2:61185502-61185618=61186446-61186497:+	IR-S	69.23	92.38	78.57	96.32	64.71	95.07	70.37	95.94	61.9	96.71	51.02	72.67	58.49	96.55	78.12	88.68	96.37	93.48	98.47	79.01	95.8	74.74	90.64	66.67	89.95	32.45	65.85	87.03	94.66	91.91	95.05	50	60.58	64	84.06	35.59	76.33	40	67.16	50.88	71.26	27.78	46.67	37.5
AIG1	HsaINT0006048	chr6:143333446-143339638	6193	chr6:143333282-143333445=143339639-143340304:+	IR-S	13.16	92.5	14.89	77.05	11.11	82	22.58	83.05	15.94	90	23.33	91.04	14.29	62.96	29.9	23.08	68	15	72.97	21.21	86.89	20.75	75	20	70.91	32.14	53.57	30.56	64.29	43.48	72.41	14.29	29.03	20	65.38	24.53	35.14	30.43	32.14	29.41	35.85	4.48	60	23.81
AIM1L	HsaINT0006071	chr1:26336371-26336605	235	chr1:26336606-26336732=26336338-26336370:-	IR-C	40.54	30.77	41.46	36.84	46.67	33.33	45	50	50	41.18	53.49	27.27	36.84	22.22	60	75	27.27	100	50	27.27	42.86	100	77.78	100	100	11.11	100	100	50	75	81.82	100	100	20	60	37.5	50	75	71.43	60	33.33	27.27	60	100
AKAP1	HsaINT0006181	chr17:57107179-57110024	2846	chr17:57105441-57107178=57110025-57110158:+	IR-S	8.52	36.73	7.76	28.57	10.62	26.4	7.94	38.57	13.9	33.33	9.47	39.02	8.71	35.65	14.41	11.43	34.29	20.29	35.43	11.28	47.77	18.92	58	15.34	34.43	16.84	31.53	22.67	41.05	15.58	22.98	33.33	25	27.45	31.15	32.22	26.47	29.51	32.8	21.48	24.29	31.61	28.93	17.33
AKAP11	HsaINT0006204	chr13:42313131-42313893	763	chr13:42313047-42313130=42313894-42313940:+	IR-S	0	33.33	0	0	0	6.67	2.44	0	6.25	21.43	5.26	14.29	5.26	55.56	2.22	50	53.85	29.73	42.86	35.71	33.33	17.24	25	24	60	21.05	50	22.73	84.62	36.84	42.86	3.61	11.11	3.61	13.04	2.63	12	4.35	8.33	1.37	2.86	0	7.69	8.57
AKAP8	HsaINT0006305	chr19:15373341-15373785	445	chr19:15373786-15374065=15372851-15373340:-	IR-S	22.35	74.73	14.29	83.39	11.38	83.11	18.6	84.03	20.35	75	14.78	95.59	26.23	78.57	18.26	29.11	66.37	22.22	69.23	15.97	72.17	16.5	67.37	22.89	75.25	30.58	69.15	17.33	65.85	15.38	49.33	18.52	61.11	22.86	71.74	9.89	45.76	12.28	45.3	10.59	50	20.51	62.9	11.83
AKAP8L	HsaINT0006322	chr19:15399411-15400294	884	chr19:15400295-15400358=15399302-15399410:-	IR-C	4.85	89.38	4.72	91.56	6.67	87.79	3.73	94.64	4.76	91.34	3.67	92.47	3.23	90.35	14.39	17.8	89.53	18.22	88.32	17.39	86.95	11.42	77.2	11.11	80.51	15.9	84.46	16.95	88.7	20	86.26	8.09	44.1	6.84	48.03	8.06	54.61	8.71	38.75	6.18	55	7.41	47.03	5.92
AKAP8L	HsaINT0006323	chr19:15397856-15399301	1446	chr19:15399302-15399410=15397714-15397855:-	IR-S	4.6	92.15	3.68	90.69	3.76	87.57	9.33	92.62	5.08	88.98	4	90.24	4.66	89.86	11.7	16.28	91.04	16.16	88.84	15.79	92.67	16.96	89.89	22.35	88.86	15.09	90.6	15	89.53	18.27	88.68	19.2	77.48	17.6	80.58	18.46	77.65	24.34	78.91	21.1	83.08	20.22	83.37	15.01
AKAP9	HsaINT0006355	chr7:92089530-92093096	3567	chr7:92089385-92089529=92093097-92093316:+	IR-C	4.35	55.56	23.81	52.94	24.32	38.46	8.11	66.67	8.33	28.12	16.42	25	21.05	45.83	9.09	44.44	62.96	31.58	37.5	11.11	50	4.35	50	30.43	15.79	15.79	7.14	15.79	71.43	40	33.33	8.7	16.28	14.29	11.43	18.64	9.68	7.69	6.82	5.88	11.43	6.67	12.28	15.56
AKAP9	HsaINT0006367	chr7:92108634-92110121	1488	chr7:92108494-92108633=92110122-92110673:+	IR-C	2.86	27.93	4.35	21.74	4.76	41.18	8.7	31.09	6.67	29.27	4.55	38.78	0	19.23	12.5	17.65	45.95	15.56	61.29	14.29	41.18	23.08	62.96	11.11	57.14	17.24	33.33	4.35	35.48	16.67	50	27.27	36.72	44.26	35.11	35.14	49.4	25.86	43.56	20.51	33.86	22.73	43.08	29.41
ALAD	HsaINT0006628	chr9:113392170-113393446	1277	chr9:113393447-113393634=113392119-113392169:-	IR-S	15.79	31.71	7.14	40.35	6.38	31.71	12.82	71.43	15.56	62.96	13.04	54.84	6.67	47.62	10.34	36.17	53.42	31.91	75	31.82	40	39.68	45.76	23.81	45	28.21	48.05	15.56	58.73	41.94	60.47	24.71	52.27	29.41	42.86	19.51	34.62	25	48	27.27	42.86	38.27	43.12	24.14
ALAD	HsaINT0006631	chr9:113390677-113390797	121	chr9:113390798-113390933=113390593-113390676:-	IR-S	6.25	77.78	20	92.41	26.83	90.16	21.95	88.73	14.29	76.32	18.92	82.98	18.92	74.19	37.93	39.53	85.71	45.45	91.4	60	90.73	62.96	96.67	33.33	86.79	40	87.16	43.48	94.06	64.1	83.91	24.44	77.55	53.4	85.62	31.03	90	46.67	75	40.23	75.17	44.3	81.71	44.93
ALDH4A1	HsaINT0006871	chr1:18871791-18872803	1013	chr1:18872804-18872957=18871430-18871790:-	IR-S	95.09	100	97.8	95.97	97.33	96.15	94.97	91.94	100	98.88	90.67	93.42	96.53	97.91	100	97.44	97.33	95.6	97.73	88.89	100	97.14	100	100	100	92.68	95.4	97.83	100	96.12	88.57	100	100	100	100	98.51	100	98.43	100	100	100	94.41	100	98.6
ALG12	HsaINT0006983	chr22:49904067-49904178	112	chr22:49904179-49904254=49903206-49904066:-	IR-S	7.25	66.67	10.29	50	9.3	72.5	7.51	67.5	5.26	67.09	12.4	62.5	7.55	62.89	3.95	18.18	60.87	11.36	53.33	16.33	47.11	14.75	45.45	10.34	50.82	16.28	58.49	11.83	60.56	12.94	32.39	22.52	39.13	27.27	52.69	17.29	52.69	26.32	47.62	17.89	56.1	22.64	42.86	17.02
ALG2	HsaINT0007029	chr9:99218837-99221546	2710	chr9:99221547-99221964=99216425-99218836:-	IR-C	36	80	8.7	12	15	77.78	41.94	68.42	19.4	63.64	26.67	68	17.39	71.43	27.66	54.29	69.23	48	69.23	33.33	51.35	26.32	33.33	18.6	20.93	21.57	71.43	31.58	55.56	70	61.54	30.91	43.75	40	39.13	20.93	35.71	11.11	26.32	21.74	28.57	28	33.33	39.39
ALG6	HsaINT0007063	chr1:63412062-63414060	1999	chr1:63411926-63412061=63414061-63414146:+	IR-S	0	61.11	0	74.74	6.9	45.45	9.68	70	4.62	35.48	11.11	58.26	3.33	57.89	20.99	11.11	91.11	4	9.09	12.5	50	23.08	100	0	33.33	3.23	11.11	20	70.91	34.96	84.91	0	23.08	7.69	40	25	0	33.33	46.67	33.33	40	20	42.86	0
ALG8	HsaINT0007066	chr11:78127437-78139493	12057	chr11:78139494-78139653=78127358-78127436:-	IR-S	3.32	25	8.29	12.12	5.94	22.86	2.07	12.5	2.18	9.8	5.06	15.79	7.48	38.46	7.39	20.38	15.79	18.75	27.54	17.57	21.99	12.26	20	11.73	17.02	23.2	16.28	10.24	21.84	20.19	23.68	29.55	9.52	19.51	38.46	17.46	31.58	16	15.15	20	29.03	21.88	15.38	25.93
ALKBH2	HsaINT0007125	chr12:109092938-109093246	309	chr12:109093247-109093488=109092507-109092937:-	IR-C	36	72.22	46.15	61.54	18.92	84.62	21.95	100	22.22	68.42	36.36	75.76	27.27	91.67	35.48	14.89	47.37	20	20	36.84	59.26	30	55.56	33.33	57.14	16.98	31.03	29.73	58.82	17.65	22.22	33.33	21.74	10.34	33.33	17.65	42.86	30.77	29.41	22.22	75	36.84	52.38	5.88
ALKBH6	HsaINT0007144	chr19:36011465-36013020	1556	chr19:36013021-36013089=36011404-36011464:-	IR-S	4.92	22	11.11	33.74	4.35	29.03	5.41	28.34	9.09	38.46	12.28	32.82	5.41	21.69	3.16	27.27	16.88	35.14	34.58	15.07	39.78	22.81	39.31	25.93	32.76	10.26	37.1	14.89	29.63	17.65	39.13	6.67	19.02	14.78	25.53	11.11	30.89	7.96	26.67	9.52	25.26	13.64	28.77	6.02
ALKBH6	HsaINT0007145	chr19:36011046-36011403	358	chr19:36011404-36011464=36010894-36011045:-	IR-S	13.76	34.78	11.77	33.79	19.18	40.12	8.94	34	16.82	45.64	12.98	32.58	14.27	26.42	7.06	12.25	47.21	24.36	29.9	10.03	37.01	24.31	33.03	14.51	31.04	12.66	40.89	13.18	41.5	13.67	29.27	10.79	24.62	16.8	24.75	10.31	26.39	3.4	24.01	11.77	30.17	8.85	23.17	17.01
ALKBH6	HsaINT0007146	chr19:36010684-36010893	210	chr19:36010894-36011045=36010567-36010683:-	IR-C	15.56	93.36	17.65	87.85	33.33	91.47	20	93.46	22.45	92.68	28.3	88.95	25	93.27	36.23	55.56	93.41	64.29	87.76	41.18	93.89	45.45	92	33.33	92.7	42.86	91.8	59.09	94.44	66.67	81.61	32.79	85.19	49.4	80.73	36.26	74.25	43.43	81.22	48.78	83.33	45.16	86.27	30.53
ALMS1	HsaINT0007185	chr2:73603305-73608474	5170	chr2:73603241-73603304=73608475-73608574:+	IR-C	9.07	29.17	0	10.13	9.75	12.82	10.13	32.55	10.53	9.68	12.57	18.1	1.49	12.28	2.22	36	45.5	22.45	50.77	25.07	31.02	12.5	23.63	23.81	25.9	17.39	43.24	27.49	50.86	12.57	32.58	5.26	27.09	7.14	31.55	2.44	21.74	5.26	0	14.29	46.37	28.57	10	17.1
AMACR	HsaINT0007509	chr5:33988362-33989110	749	chr5:33989111-33989502=33986986-33988361:-	IR-S	94.29	84.62	95.24	85.71	90.24	83.33	100	100	100	100	91.11	55.56	100	100	100	81.13	100	100	100	100	100	87.5	100	100	100	100	100	100	100	80.95	100	88.24	93.55	100	100	88.24	100	95.56	100	100	92	100	86.67	100
AMBRA1	HsaINT0007551	chr11:46542982-46543251	270	chr11:46543252-46543398=46541945-46542981:-	IR-S	27.66	50	38.46	21.74	53.12	30.43	26.98	25	23.08	36.84	36.84	33.33	20	23.08	34.55	29.41	18.75	20	44.44	27.27	36	25	39.39	64.71	25	37.5	35.48	37.14	30.77	28.12	45.83	48.62	40	50.59	60	52.17	59.18	52.46	55.56	47.46	35.59	53.57	51.11	48.72
AMDHD2	HsaINT0007578	chr16:2528719-2528993	275	chr16:2528452-2528718=2528994-2529095:+	IR-S	13.16	39	10	42.92	7.69	39.04	7.07	42.48	4.48	44	6.45	43.32	5.98	45.07	9.09	14.29	43.48	15.38	58.54	33.33	65.87	17.65	62.73	32.14	51.2	23.08	51.22	22.22	55.75	18.18	37.5	60	68.14	33.33	79.73	48.39	63.64	35	76.67	38.46	71.24	52.94	73.71	14.89
AMH	HsaINT0007606	chr19:2250480-2250651	172	chr19:2250337-2250479=2250652-2250760:+	IR-S	76.47	93.21	81.82	94.84	73.33	95.9	87.5	94.39	100	97.67	63.64	96.51	50	95.43	54.84	52.63	93.39	71.83	97.34	58.67	95.22	65.82	94.5	86.05	94.22	73.68	94.42	74.07	96.82	66.04	93.23	61.51	92.72	79.26	93.56	70.18	93.11	67.12	92.35	75.86	94.13	65.45	93.91	56.47
AMMECR1L	HsaINT0007643	chr2:127869545-127870813	1269	chr2:127870814-127870928=127869454-127869544:-	IR-S	7.69	23.08	13.51	18.92	7.69	50	3.7	33.33	5.26	60	7.32	33.33	20	0	27.27	52	20	28	66.67	12.5	48.15	22.58	55.56	24.14	20	20	25.71	25.93	28.57	37.93	61.29	9.09	33.33	7.69	14.29	11.63	23.08	10.2	33.33	9.09	33.33	15	25.93	20
AMT	HsaINT0007773	chr3:49419152-49419259	108	chr3:49419260-49419405=49418971-49419151:-	IR-S	8.84	67.32	12.85	60.76	14.71	65.16	13.61	71.28	11.89	66.67	15.28	60.76	20.73	60.88	17.07	16.48	48.31	10.11	49.73	15.38	45.34	16.13	58.21	19.59	44.34	22.39	43.33	16.67	45.51	15.22	31.75	7.14	49.21	9.8	29.55	20.45	34.52	11.69	45.45	11.34	42.65	9.59	30.69	14.67
AMT	HsaINT0007775	chr3:49417368-49417614	247	chr3:49417615-49417718=49416778-49417367:-	IR-S	86.83	90.52	94.14	90.97	90.31	93.03	81.51	84.62	93.22	95.34	85.42	89.09	88.32	92.45	87.65	86.47	80.44	85	83.71	87.06	86.14	93.04	84.65	96.32	91.84	86.16	83.85	81.37	83.68	83.78	80.9	94.94	98.07	100	96.25	97.94	92.35	98.54	94.81	95.83	94.94	95.35	95.27	98.69
AMZ2P1	HsaINT0007817	chr17:64972928-64973241	314	chr17:64973242-64973517=64972754-64972927:-	IR-S	42.21	56.03	18.85	67.08	8.68	60.61	1.8	72.73	24.14	49.5	22.27	67.65	12.67	75.42	22.49	14.74	36.23	8.33	42.73	15.9	57.9	33.23	46.34	18.13	36.28	23.01	51.02	14.92	44.93	19.4	42.11	15.78	57.59	28.26	34.09	9.85	20.75	15.02	40.72	16.88	44.69	15.55	51.11	31.46
ANAPC2	HsaINT0007883	chr9:137175838-137180180	4343	chr9:137180181-137180384=137175708-137175837:-	IR-S	0	52.53	5.05	59.32	6.15	54.97	8.77	77.78	2.29	67.83	4.59	71.73	8.64	58.46	11.11	15.56	76.39	12.82	68	10.89	70.07	14.94	64.95	11.83	62.8	13.04	61.45	9.59	67.35	17.24	67.82	8.99	44.53	13.58	51.45	13.11	53.85	9.5	69.03	14.79	60.69	8.38	50.89	8.05
ANAPC2	HsaINT0007886	chr9:137186357-137187480	1124	chr9:137187481-137188103=137186224-137186356:-	IR-C	16.19	79.17	15.56	82.33	9.89	78.52	29.31	82.68	10.97	81.63	14.67	82.27	16.52	72.83	34.51	31.25	85.4	17.5	82.53	32.47	81.71	25.55	73.26	34.15	69.52	22.48	68.88	40.82	80.16	35.9	80.06	18.92	52.56	17.1	47.42	22.35	58.69	16.48	52.99	14.29	49.12	9.5	57.14	18.63
ANAPC4	HsaINT0007895	chr4:25392422-25393804	1383	chr4:25392338-25392421=25393805-25393891:+	IR-S	0	33.33	13.33	38.71	4.76	26.83	9.68	37.93	3.85	40.26	12.2	59.09	0	39.29	8.11	11.11	50	3.45	15.38	11.11	12.73	4.35	28.57	11.11	16.13	5.26	23.53	18.92	18.52	14.29	12.5	50	33.33	22.22	30	6.67	12.5	20	38.46	10	55.56	0	33.33	0
ANAPC4	HsaINT0007908	chr4:25413743-25414323	581	chr4:25413645-25413742=25414324-25414385:+	IR-S	3.03	40.35	0	62.04	7.69	45.56	12.73	50.33	12.33	48.6	15.79	48.84	3.45	53.37	17.24	45.83	62.67	41.46	62.5	25.58	56.04	21.05	51.22	12.73	50	25	68.75	27.27	51.81	32.39	73.13	4.35	53.25	26.32	38.46	25	33.33	18.18	56.25	23.08	37.14	10	57.58	35.71
ANGEL1	HsaINT0007954	chr14:76803913-76806415	2503	chr14:76806416-76806849=76803786-76803912:-	IR-S	10.14	63.64	14.67	65.22	7.37	82.09	19.19	78.95	23.81	61.54	6.52	74.47	40	100	14.71	34.04	54.17	42.57	52.94	47.37	75.19	49.15	76	38.24	55.56	35.9	64.71	30.77	57.58	38.64	62.11	61.54	36.84	68	68.42	42.86	55.56	100	67.57	53.33	62.16	50	60	68.75
ANGEL2	HsaINT0007962	chr1:213005455-213007128	1674	chr1:213007129-213007198=213005033-213005454:-	IR-C	0	45.45	6.12	31.43	1.69	25.71	3.57	20	7.69	28.89	10.2	57.89	1.33	45.45	13.79	48	57.89	21.74	33.33	10.53	35.85	5.26	45.45	4.65	25.71	11.54	18.18	8.64	33.33	24	46.34	4.76	10	0	0	26.32	0	4.35	20	6.67	10	7.69	0	9.52
ANGEL2	HsaINT0007963	chr1:213000913-213005032	4120	chr1:213005033-213005454=213000786-213000912:-	IR-S	28	90.48	15.15	74.19	15.38	61.9	0	100	20	88.89	11.76	83.33	16.28	88.24	31.03	46.34	86.67	42.86	100	16.67	88.24	15.56	50	8.11	70	9.09	66.67	44.68	66.67	58.33	78.95	5.26	36.36	4.35	11.11	23.08	100	10.34	66.67	18.18	30	36.84	33.33	16.67
ANGEL2	HsaINT0007964	chr1:213000384-213000785	402	chr1:213000786-213000912=213000326-213000383:-	IR-S	8.33	60	6.67	47.83	13.73	63.27	7.14	64.44	10.64	50	13.51	73.33	33.33	69.23	12.2	20	66.67	35.29	61.54	16	36.51	11.86	23.53	14.29	25	16	42.86	15.94	32.26	33.33	43.24	0	13.04	2.13	8.11	7.69	20	8.33	20	0	41.18	11.11	12	3.23
ANKDD1A	HsaINT0008196	chr15:64943583-64944651	1070	chr15:64943484-64943582=64944652-64944747:+	IR-S	33.33	33.33	25	75	60	74.19	11.11	60	20	77.78	33.33	71.43	33.33	70	50	0	60	14.29	55.56	0	64.29	80	42.86	20	66.67	71.43	100	42.86	77.78	0	50	0	11.11	20	14.29	11.11	100	0	25	20	77.78	0	60	100
ANKDD1A	HsaINT0008197	chr15:64944748-64947403	2679	chr15:64944652-64944747=64947404-64947593:+	IR-S	56.43	90.22	68.61	100	36.82	92.91	77.27	95.22	19.54	100	100	92.1	16.27	82.19	39.31	100	83.61	100	86.77	13.93	80.5	100	100	66.02	100	59.3	70.83	100	88.6	19.54	78.83	0	44.74	24.46	56.43	44.74	74.45	0	42.15	19.54	100	32.69	72.76	32.69
ANKDD1A	HsaINT0008206	chr15:64931586-64934135	2552	chr15:64931487-64931585=64934136-64934234:+	IR-C	53.85	41.18	25	42.86	9.68	47.83	69.23	44	14.29	24.32	86.67	47.83	33.33	63.64	38.46	0	100	42.86	37.5	60	50	55.56	66.67	12.5	27.27	20	33.33	66.67	45.45	26.32	29.41	22.22	41.18	100	14.29	60	37.5	50	23.08	26.32	71.43	60	20	20
ANKFY1	HsaINT0008227	chr17:4182353-4183397	1045	chr17:4183398-4183551=4182181-4182352:-	IR-S	0	87.23	0	67.27	9.09	100	50	95.51	12.5	89.83	74.47	100	71.43	55.56	75	41.18	88.12	73.21	85.66	14.29	81.6	27.27	100	0	82.35	57.75	70.37	25	85.44	16.67	96.08	5.26	40	53.85	25	16.13	82.52	10.34	26.32	0	25	44.19	88.35	5.26
ANKFY1	HsaINT0008237	chr17:4167912-4169197	1286	chr17:4169198-4169288=4163371-4167911:-	IR-C	8.47	57.02	13.33	60.43	6.85	55.68	8.77	65.85	6.38	67.92	12.5	74.87	8.47	67.39	23.08	35.29	79.63	22.5	80.27	24.75	74.79	13.76	74.42	14.04	55.7	15	64.97	18.46	65.64	28.21	68.38	6.67	43.33	17.5	56.52	23.24	53.42	14.89	47.37	10.94	44.78	13.21	46.75	11.73
ANKHD1	HsaINT0008278	chr5:140535539-140537388	1850	chr5:140535362-140535538=140537389-140537589:+	IR-C	39.81	61.68	47.66	62.62	42.55	54.55	60.36	81.01	38.46	73.83	57.89	79.07	51.81	72.97	60.82	52.46	68.7	44.79	72	43.01	61.83	46.59	59.29	37.63	46.97	38.33	58.33	32.96	62.76	41.79	78.85	42.15	35.34	26.8	40.32	30.69	49.3	25.58	31.91	26.72	40.95	38.95	48.31	32.77
ANKIB1	HsaINT0008309	chr7:92345067-92350949	5883	chr7:92344978-92345066=92350950-92351094:+	IR-S	8	78.95	10.2	40	3.33	39.13	18.37	57.58	21.57	36	13.43	54.55	16.36	73.33	28	28.21	73.33	41.18	100	23.08	42.86	15	80	12.2	41.67	23.4	60	47.62	27.27	33.33	83.33	8.7	40	4.35	14.29	12.2	13.04	33.33	40.74	7.69	37.5	25.49	36.36	6.12
ANKLE1	HsaINT0008322	chr19:17283003-17283224	222	chr19:17282864-17283002=17283225-17283962:+	IR-S	14.29	40.98	9.09	51.43	6.67	53.85	11.11	77.14	0	63.27	0	64.56	2.7	78.72	13.04	50	62.16	33.33	61.9	20	48.94	25	64.91	20	44.62	14.29	54.39	66.67	44.19	50	55.56	0	38.46	6.67	39.53	6.67	37.14	12.5	24.68	33.33	38.46	14.29	40.74	6.67
ANKLE2	HsaINT0008335	chr12:132741486-132743153	1668	chr12:132743154-132743276=132741419-132741485:-	IR-S	7.94	43.48	5.26	52.38	9.57	42.27	8.8	61.04	15.07	35.71	7.14	50.94	8.33	48.57	12.64	56.52	61.54	45.45	70.59	15.07	62.35	11.11	41.18	8.64	46.43	27.54	58.62	26.67	48.65	30.91	71.93	0	3.33	0	1.89	5.45	14.29	0	4.35	0	7.69	9.68	5	2.22
ANKLE2	HsaINT0008338	chr12:132734576-132735405	830	chr12:132735406-132735512=132734385-132734575:-	IR-C	17.65	85.99	19.01	77.92	14.75	67.5	12.87	76.53	33.93	75.96	20	76.07	36.84	75.84	26.21	28	46.97	32	35.54	33.98	52.1	18.26	51.22	15.94	47.06	23.44	54.47	17.54	45.73	27.08	30.43	20.88	53.85	16.95	36	21.52	39.29	25.77	36.36	17.07	46.07	21.28	44.58	30.12
ANKMY1	HsaINT0008355	chr2:240520534-240523884	3351	chr2:240523885-240524381=240520362-240520533:-	IR-C	100	100	81.82	66.67	100	100	77.78	81.82	38.46	55.56	60	55.56	100	71.43	63.64	54.55	52.94	60	50	42.86	65.85	41.18	54.84	70	44	41.67	52.94	68	45	40	83.33	30.43	44	20	50	53.85	55.56	41.18	64.29	69.23	40	14.29	66.67	57.89
ANKRA2	HsaINT0008369	chr5:73561289-73562592	1304	chr5:73562593-73562985=73561130-73561288:-	IR-S	5.88	45.45	25	31.91	4.55	28.57	12.9	21.52	23.64	56.25	20	55	14.29	55.56	6.9	9.68	26.83	9.09	24.44	11.48	27.91	20	28.21	20	14.89	21.05	21.74	9.86	21.31	23.94	9.33	4.76	9.09	15.79	20	7.69	10.34	25	13.51	7.69	11.11	14.29	15.38	10.53
ANKRA2	HsaINT0008371	chr5:73555586-73557574	1989	chr5:73557575-73557640=73555488-73555585:-	IR-S	3.03	46.15	0	36.84	2.44	43.75	5.88	29.58	0	28.21	9.09	48.57	4.55	45.45	6.67	37.04	42.22	36	52.17	27.27	50	42.11	57.89	18.75	26.32	33.33	44.44	21.21	39.53	30.43	64.29	6.67	30.77	7.32	20	17.39	16.67	17.24	46.67	15.79	33.33	15.79	14.29	14.29
ANKRA2	HsaINT0008372	chr5:73554987-73555487	501	chr5:73555488-73555585=73554861-73554986:-	IR-S	5	95	10.64	70.59	11.54	82.35	28.81	97.12	10.45	74.68	18.92	85.19	10.77	91.18	20	60	87.69	78.08	93.65	39.02	75	26.15	79.22	28.57	63.89	36.51	85.29	48.24	82.52	69.57	84.07	7.25	61.04	13.79	59.32	25.49	30	19.15	50	15.79	33.33	20	55	9.86
ANKRD10	HsaINT0008386	chr13:110893264-110906032	12769	chr13:110906033-110906124=110893028-110893263:-	IR-C	47.9	97.4	49.83	87.94	51.7	87.82	44.22	93.19	45.97	86.29	59.6	93.73	51.29	94.38	58.17	90.4	95.73	89.55	96.51	86.92	92.61	73.47	94.95	76.27	91.19	81.27	96.04	88.55	92.34	87.45	93.62	62.71	89.61	69.8	91.89	75.32	80.74	64.13	75.64	62.07	82.91	61.5	84.94	65.45
ANKRD10	HsaINT0008388	chr13:110880113-110883697	3585	chr13:110883698-110883793=110878540-110880112:-	IR-S	7.14	25.31	6.72	25.49	9.96	27.06	9.42	26.42	14.73	30.37	15.42	28.71	13.2	26.38	10	18.07	47.97	27.66	34.78	29.85	51.59	25.53	39.85	21.55	35.44	22.63	33.33	32.8	37.97	23.71	41.61	23.33	32.32	40.86	33.61	25.3	32.9	24.67	34.2	23.02	37.45	27.4	35.09	34.6
ANKRD11	HsaINT0008398	chr16:89286187-89288527	2341	chr16:89288528-89288670=89286039-89286186:-	IR-C	42.29	59.22	36.54	51.77	39.58	47.97	60.17	74.86	45.27	46.18	40.54	62.85	48.39	68.8	45.06	59.82	71.99	45.95	63.68	32.1	51.29	29.47	50.17	28.95	40.45	34.35	39.94	39.25	51.6	43.05	78.59	35.46	34.62	34	37.56	23.03	43.33	33.12	39.77	35.74	35.62	33.33	32.05	31.1
ANKRD12	HsaINT0008410	chr18:9258932-9263789	4858	chr18:9254211-9258931=9263790-9263888:+	IR-S	21.74	33.33	33.33	31.34	30	32.2	20.75	42.86	10.53	26.09	30.77	39.39	53.85	55.56	27.78	18.92	37.5	23.08	26.32	26.32	24.44	2.86	38.46	7.69	9.09	8.11	7.14	11.63	20	25	66.67	0	25	1.23	18.75	1.27	2.04	1.96	12.82	2.22	2.33	0	23.4	3.23
ANKRD13A	HsaINT0008427	chr12:110027767-110028511	745	chr12:110027705-110027766=110028512-110028642:+	IR-C	18.92	47.37	12.12	23.08	12	29.73	12.28	47.83	6.12	47.37	13.21	39.13	14.75	60	10.64	36.08	52.94	33.33	54.29	19.61	33.81	25.23	54.55	33.33	48.65	19.35	32.76	18.11	37.14	20.57	43.69	13.62	43.94	16.28	43.24	21.1	33.78	17.7	37.25	22.73	26.42	20.67	38.35	21.05
ANKRD13B	HsaINT0008433	chr17:29612964-29613353	390	chr17:29612887-29612963=29613354-29614761:+	IR-S	22.22	93.39	56.52	94.31	31.58	96.51	35.71	95.14	25	94.59	33.33	95.05	18.52	95.73	40.91	51.11	93.23	45.45	94.27	31.18	89.93	25.98	90.6	34.62	86.67	38.1	92.22	26.83	90.4	34.69	92.42	21.24	80.8	25.25	76.79	29.91	79.28	20.38	75.96	28.78	77.82	36.36	81.33	33.33
ANKRD13D	HsaINT0008461	chr11:67290447-67291475	1029	chr11:67290322-67290446=67291476-67291521:+	IR-S	3.7	71.7	4.35	66.67	16.67	65.91	35.48	83.18	29.03	71.96	25.93	70.87	3.03	61.34	9.68	10.2	73.2	42.86	68.22	27.27	71.43	23.53	56.21	20	42.86	20	71.43	4.62	63.78	17.95	80.85	6.17	44.52	14.89	47.06	7.69	37.58	10.26	43.59	9.28	48.07	11.25	40.31	6.67
ANKRD13D	HsaINT0008464	chr11:67292181-67299057	6877	chr11:67291991-67292180=67299058-67299124:+	IR-C	8.33	42.58	17.24	34.05	18.03	41.98	16.42	42.36	21.21	44.55	9.38	35.76	21.43	36.13	12.82	25	45.65	35.48	56.58	24.68	50.6	44.07	44.09	41.94	56.07	31.15	35.55	36.67	40.1	22.67	47.62	13.23	43.43	22.94	44.1	21.28	41.09	19.49	49.5	19.1	50.94	26.26	44.59	10.75
ANKRD13D	HsaINT0008465	chr11:67299125-67299529	405	chr11:67299058-67299124=67299530-67299611:+	IR-S	13.95	50	17.5	40.71	14.29	58.19	19.51	44.4	17.95	55.77	13.04	53.85	13.33	60.33	8.89	16.67	52.81	25.33	52.94	24.21	47.99	14.81	59.06	32.43	46.12	12.87	61.18	20	51.85	25	46.88	10.9	38.42	15.43	38.42	11.18	35.77	16.67	50.33	11.74	46.13	11.82	39.47	7.8
ANKRD16	HsaINT0008475	chr10:5880377-5883005	2629	chr10:5883006-5883167=5880298-5880376:-	IR-C	10.34	21.74	5.88	57.89	12	37.78	12	80.65	4.76	43.48	14.29	38.46	0	10	13.04	12	55.56	16.67	47.06	3.7	23.08	20	33.33	6.67	15.38	0	23.08	12	29.41	26.32	46.67	7.69	23.08	3.45	13.04	12	0	20	0	8.57	6.67	10	14.29	0
ANKRD23	HsaINT0008615	chr2:96839826-96839996	171	chr2:96839997-96840095=96839727-96839825:-	IR-S	11.11	10.53	33.33	29.11	50	30.56	100	9.38	0	25.37	33.33	29.03	0	25.58	14.29	33.33	68.97	55.56	83.61	33.33	56.72	100	66.2	11.11	69.23	25	67.27	100	68.18	50	65.38	41.18	55	39.13	68	57.14	50.72	43.75	60	36.84	52.24	76.47	65.79	45.45
ANKRD24	HsaINT0008634	chr19:4202091-4202868	778	chr19:4202026-4202090=4202869-4202926:+	IR-S	29.41	56.52	30.23	54.43	34.62	74.55	25.93	45.45	33.33	66.67	30.43	56.52	40	100	30.43	100	100	71.43	14.29	100	83.33	33.33	100	50	33.33	20	100	33.33	71.43	0	60	33.33	45.45	25	48.39	28.57	100	25	40	27.27	50	100	44.44	23.08
ANKRD49	HsaINT0009099	chr11:94496952-94498070	1119	chr11:94496604-94496951=94498071-94499578:+	IR-C	14.29	71.43	5.45	15.79	11.11	53.85	23.64	63.64	5.88	50	20.83	20	23.4	57.89	14.29	40.43	81.82	41.18	50	43.59	52.63	36.84	66.67	12.5	42.86	24.14	73.91	35.29	50	38.46	58.33	18.52	40.74	39.53	28.57	30.43	14.29	17.24	53.85	25	69.23	13.33	66.67	28.57
ANKRD52	HsaINT0009126	chr12:56257362-56257827	466	chr12:56257828-56257911=56257283-56257361:-	IR-S	25	60	3.23	48.15	8.2	65.12	13.04	59.09	11.11	66.67	10	60.44	9.68	100	8.57	45.45	82.98	30	88.46	30	64.34	15.79	76.74	18.75	45.71	29.41	49.09	50	74.47	36	95.83	12.5	29.41	13.04	41.18	20.93	34.69	13.79	37.25	8.57	44.83	6.25	51.22	6.9
ANKRD6	HsaINT0009172	chr6:89627697-89629111	1415	chr6:89627583-89627696=89629112-89629223:+	IR-C	8.33	48.15	17.65	57.14	0	50	13.04	56.25	3.45	15.25	38.46	45.45	7.69	47.17	18.52	37.7	63.33	38.3	67.12	20.69	49.21	5.88	44	12.9	42.11	9.26	36.11	10.34	41.82	12.5	65.38	7.14	11.43	4.76	9.52	3.23	11.76	1.27	10.53	4.35	11.11	0	4.35	0
ANKRD6	HsaINT0009179	chr6:89613891-89616558	2668	chr6:89613792-89613890=89616559-89616657:+	IR-C	9.09	5.88	12	20	14.29	9.68	20	76.47	20	25.93	0	73.33	30	20	5.26	31.03	41.67	23.68	52.73	8.47	38.24	12.5	57.89	16.36	28.77	17.65	38.78	13.04	52	5.88	52	5.66	11.63	16.67	23.81	6.9	10.34	1.59	22.58	0	14.29	4.55	11.11	7.32
ANKRD6	HsaINT0009181	chr6:89618032-89621921	3890	chr6:89617954-89618031=89621922-89622026:+	IR-C	15.79	100	6.67	51.52	33.33	60	25	68.75	18.18	68.75	33.33	56.52	45.45	47.37	17.65	15.15	66.67	27.78	61.9	17.81	41.67	9.09	64.29	7.69	56.96	23.6	40.54	9.38	42.86	22.45	45.83	20	46.67	30.91	80.95	36.23	51.35	20.55	52	24.44	60	33.33	72.73	33.33
ANKS1A	HsaINT0009194	chr6:35054166-35060146	5981	chr6:35054099-35054165=35060147-35060253:+	IR-S	1.59	21.74	1.59	16.13	1.56	12.2	0	12	7.14	17.24	3.03	21.43	0	26.32	0	1.96	12	0	26.32	0	9.52	5.56	37.5	2.13	16.67	4.55	23.08	0	42.86	2.33	3.45	14.29	17.07	27.47	23.81	15.38	12.5	17.07	38.89	29.41	17.65	7.14	37.5	9.38
ANKS1A	HsaINT0009206	chr6:35087050-35088605	1556	chr6:35086952-35087049=35088606-35091413:+	IR-S	9.26	43.28	12.7	39.13	13.82	34.94	25.71	50	9.43	39.13	14.73	33.33	10	25.42	5.98	28	66.67	22.03	38.89	22.67	50.46	28.7	29.41	14.81	20.83	18.68	48.78	20	50	7.25	39.13	57	78.34	72.21	65.31	67.91	74.89	60.58	68.24	61.8	78.57	65.28	67.44	61.54
ANKS3	HsaINT0009243	chr16:4699177-4700969	1793	chr16:4700970-4701134=4699052-4699176:-	IR-C	8.11	58.95	2.7	46.97	11.11	37.58	10.2	55.1	9.09	64.49	11.11	59.29	7.32	59.75	20	9.68	72.73	28.89	68.81	15.38	67.82	20	66.06	14.29	50	25	57.3	8.77	65.22	27.27	71.72	16.36	64.14	27.03	61.14	8.64	52.17	20	50.28	16.67	59.05	8.47	59.05	11.86
ANKS3	HsaINT0009251	chr16:4727178-4729979	2802	chr16:4729980-4730151=4726979-4727177:-	IR-C	5.26	43.28	7.69	55.56	17.24	52.78	31.03	62.5	23.08	55.56	15.79	60	10	60	25	11.11	45.1	20	52.17	40.74	45.32	6.98	45.45	8.33	35.8	3.45	45.88	11.11	29.82	29.03	60	22.22	49.45	35.29	43.33	21.05	45.45	22.22	54.55	21.43	67.57	26.67	46.24	21.05
ANKS3	HsaINT0009252	chr16:4726781-4726978	198	chr16:4726979-4727177=4726659-4726780:-	IR-S	25	64.71	33.33	64.86	28.57	67.5	33.33	96.49	50	67.57	45.45	84.42	30.77	78.57	55.56	20	85.71	26.83	69.49	40	69.23	52.94	80	31.25	63.11	72.73	66.23	57.89	81.13	50	53.85	42.11	71.43	36.36	81.08	45.95	75.68	52.73	72.63	44.19	54	30	64.23	51.22
ANKS3	HsaINT0009253	chr16:4724832-4726658	1827	chr16:4726659-4726780=4724750-4724831:-	IR-S	0	26.98	20	21.13	10	44.68	14.29	29.82	33.33	35.85	5	50	0	20	20	23.08	11.11	12.5	27.27	16.28	29.51	8.57	42.86	13.33	42.86	17.07	35.29	0	17.86	9.09	33.33	7.69	30.77	20	22.45	17.95	30	28.3	37.78	5.26	38.46	21.43	46.15	5.88
ANKS6	HsaINT0009265	chr9:98784877-98790103	5227	chr9:98790104-98790606=98784832-98784876:-	IR-C	18.18	37.5	11.11	23.64	14.29	45.76	15.33	71.43	10.26	38.18	10.89	58.33	12.36	63.16	20.37	29.58	46.27	34.78	40	16.36	39.47	20.83	41.18	9.09	55.56	7.32	19.3	23.81	45.83	17.86	58.49	28.57	33.33	14.29	0	20	33.33	27.27	42.86	11.11	50	16.67	26.32	11.11
ANKS6	HsaINT0009267	chr9:98782574-98783952	1379	chr9:98783953-98784157=98782467-98782573:-	IR-S	38.81	41.18	31.74	23.81	32.52	22.69	34.08	45.6	25.93	20.59	36.84	44.83	46.94	46.84	29.8	21.13	37.5	23.81	42.22	26.03	20	11.69	23.29	23.53	13.43	11.67	20	14.56	18.31	25	19.05	14.29	27.27	50	38.46	10	33.33	23.81	57.14	13.51	36.84	26.67	58.33	29.41
ANKZF1	HsaINT0009274	chr2:219235313-219235473	161	chr2:219234826-219235312=219235474-219235585:+	IR-S	5.63	68.23	7.51	72.83	6.81	79.1	4.81	64.87	8.82	75.39	10.96	70.89	11	73.35	11.24	22.58	71.43	25.64	71.96	31.03	79.94	24.21	84.57	27.06	80.81	37.08	75.53	30.12	68.94	21.52	68.91	40	89.13	48	89.17	31.78	81.79	42	84.54	53.06	88.97	26.67	90.62	39.78
ANKZF1	HsaINT0009275	chr2:219235586-219235707	122	chr2:219235474-219235585=219235708-219235875:+	IR-S	0.96	37.7	4.09	41.6	1.84	47.1	0.56	36.88	6.02	53.39	4.55	46.12	5.21	45.02	1.93	8.77	39.59	12.82	51.57	17.54	46.5	21.62	54.31	25.93	49.53	14.5	48.94	13.27	35.21	14.48	43.27	29.13	66.4	37.23	66.4	21.43	55.7	31.15	70.32	26.6	75.07	29.8	69.13	22.45
ANKZF1	HsaINT0009285	chr2:219234289-219234825	537	chr2:219234133-219234288=219234826-219235312:+	IR-S	2.54	87.75	12.24	82.91	6.91	84.2	7.54	90.83	11.34	92.23	11.34	85.71	6.83	88.85	12.98	25.93	90.78	47.73	90.13	22.39	85.25	28	89.34	40.91	84.66	21.74	89.12	31.87	85.81	24	82.42	42.19	84.58	43.88	87.16	39.68	78.21	36.51	85.67	38.14	84.71	25.86	85.23	28.57
ANO8	HsaINT0009491	chr19:17328984-17329756	773	chr19:17329757-17329831=17328162-17328983:-	IR-S	15.79	58.66	5.88	55.47	33.33	61.8	12.5	71.79	23.08	39.08	13.04	63.05	29.41	62.16	23.08	28	81.82	27.27	82.01	13.79	76.32	18.6	69.17	20	60.31	14.89	53.25	25.71	69.49	26.53	80.62	9.59	53.2	11.59	55.94	13.04	63.44	6.92	59.06	6.25	48.62	4.35	56.83	5.77
ANO8	HsaINT0009494	chr19:17327346-17327437	92	chr19:17327438-17327569=17327235-17327345:-	IR-S	16.42	25.13	9.3	22.93	18.68	24.43	25.71	23.73	17.46	20.79	16.42	26.14	23.81	24.89	17.07	5.71	16.85	4.11	18.87	4.5	28.87	6.41	31.09	2.5	26.75	3.23	22.17	3.33	21.24	6.54	20.11	3.95	22.13	4.2	24.47	6.43	25.55	3.31	24.05	3.18	26.99	5.66	29.04	2.95
ANO8	HsaINT0009496	chr19:17323885-17324716	832	chr19:17324717-17325386=17323223-17323884:-	IR-S	90.91	98.24	100	98.98	100	94.2	100	100	92.59	100	100	95.09	100	96.17	100	100	92	80	88.64	92.86	94.51	100	91.59	85.71	92.11	100	97.58	100	95.42	100	94.69	89.19	86.88	91.75	84.71	80.33	86.27	75	83.41	84.75	85.75	93.85	91.04	94.81
ANXA6	HsaINT0009736	chr5:151126481-151128180	1700	chr5:151128181-151128239=151126402-151126480:-	IR-S	0	2.04	0	0	0	1.27	0	7.32	0	4.17	0	1.69	0	0	0	4.66	23.51	5.65	40	3.15	43.21	7.17	46.44	3.16	23.18	5.17	47.17	3.87	31.03	2.9	26.01	19.57	57.89	39.13	73.13	60	85.71	38.78	72.31	21.74	50	15.79	57.45	20.41
AOC2	HsaINT0009841	chr17:42846215-42849085	2871	chr17:42844592-42846214=42849086-42849290:+	IR-S	23.08	73.8	44.36	62.23	28.57	62.96	55.27	66.59	39.83	66.55	33.08	70.78	47.13	53.08	59.83	28.13	61.64	33.23	66.55	50	63.05	19.54	73.18	38.33	49.86	24.55	72.44	33.12	74.19	71.31	62.16	22.99	57.1	32.98	52.42	40.98	52.25	20.81	42.8	13.93	44.66	40.22	57.01	16.47
AP1G2	HsaINT0009968	chr14:23567320-23567738	419	chr14:23567739-23568070=23567111-23567319:-	IR-C	5.05	13.22	7.1	10.38	12.16	21.25	0	13.39	0	10.2	1.96	16.3	7.36	16.8	2.95	14.81	18.03	3.23	15.15	9.44	11.54	3.03	19.85	6.37	14.7	15.48	14.96	16.22	12.71	6.45	24.69	58.99	61.28	47.27	74.21	34.2	53.37	42.88	65.74	52.15	75.26	53.21	71.26	33.33
AP1G2	HsaINT0009969	chr14:23564160-23564332	173	chr14:23564333-23564388=23564046-23564159:-	IR-S	7.41	35.98	8.7	34.86	3.57	30.95	11.11	42.33	3.12	29.22	15.38	38.52	10.53	34.94	14.75	35.71	43.27	12.82	45.95	14.29	48.59	10	51.05	21.43	50	26.67	41.18	20	42.15	25	43.03	47.83	41.82	26.32	32.7	41.18	35.86	46.15	45.51	29.73	42.23	30	35.87	23.08
AP1G2	HsaINT0009970	chr14:23563857-23564045	189	chr14:23564046-23564159=23563716-23563856:-	IR-S	16.36	50.11	14.29	52.87	10	43.38	17.24	48.87	10.77	43.01	25.58	51.86	7.32	47.54	8.77	61.9	60.22	20.93	65.42	39.53	67.91	15.38	68.68	41.67	73.76	23.08	70.85	27.27	65.62	26.53	60.32	54.55	54.1	35.48	48.54	20	56.74	35.71	52.92	19.15	46.51	23.53	51.14	13.33
AP1G2	HsaINT0009984	chr14:23565893-23566063	171	chr14:23566064-23566160=23565816-23565892:-	IR-S	9.09	52.38	11.11	69.4	12.82	63.79	10.53	63.59	9.09	71.56	10.71	66.14	12.9	57.93	26.32	44.83	88.46	52.63	78.51	18.18	77.45	54.55	79.68	22.22	69.59	41.18	67.88	16.67	81.65	57.14	83.5	55.56	63.89	20	65.62	50	64.22	28.57	55.56	11.11	64.89	50	55.66	20
AP1G2	HsaINT0009986	chr14:23565200-23565605	406	chr14:23565606-23565701=23565119-23565199:-	IR-S	2.22	71.51	5.88	79.38	5	67.74	8.11	73.37	13.79	76.19	8.7	72.4	9.68	75.91	10	16.13	78.44	29.41	62.63	6.12	62.89	20	47.54	7.14	37.63	16.67	51.83	31.43	66.36	17.39	77.78	0	15.97	8.33	16.01	6.67	32.45	0	13.33	3.7	14.63	8.33	14.53	2.56
AP3D1	HsaINT0010159	chr19:2112932-2113335	404	chr19:2113336-2113413=2112860-2112931:-	IR-C	66.93	70.21	57.04	67.83	63.74	69.78	57.65	69.23	47.52	74.47	64.44	71.73	55.38	65.77	57.58	65.08	89.41	68.57	91.03	58.14	81.88	71.05	75.29	60	75.19	59.02	81.54	72.22	82.67	69.41	86.98	60.87	63.22	59.09	57.14	49.35	55.56	53.62	63.27	45.88	55.24	58.52	60.27	57.35
AP4B1	HsaINT0010222	chr1:113902863-113904604	1742	chr1:113904605-113904793=113902638-113902862:-	IR-S	30.77	82.86	28.89	89.33	14.29	91.55	64.71	90.7	55.56	96.3	39.13	87.88	44	72.41	35.29	64.52	77.78	64.91	90.32	59.26	86.58	61.29	96.72	57.69	86.67	58.49	100	73.77	75.51	70.91	89.47	43.53	62.96	65.52	75.9	50.5	80.28	60.49	63.16	46.53	68.12	49.43	62.86	43.64
AP4B1	HsaINT0010223	chr1:113901886-113902637	752	chr1:113902638-113902862=113901755-113901885:-	IR-S	18.75	87.23	23.08	78.95	20	79.66	24.32	94.44	20	92.31	48.39	91.49	40.74	100	38.89	62.79	67.12	74.6	88.68	48.84	76.19	44.19	100	50	75.86	51.72	62.96	47.73	89.04	60	91.67	37.5	65.43	50.62	73.13	56.16	79.49	40.85	63.38	42.37	68.83	35.71	82.86	36.51
AP4M1	HsaINT0010252	chr7:100106004-100106240	237	chr7:100105959-100106003=100106241-100106291:+	IR-C	5.26	75.22	3.23	71.43	5.88	70.53	12.2	83.53	3.23	71.68	3.45	80.95	6.25	69.01	11.76	37.5	92.38	40	94.74	21.21	81.07	12.2	83.49	18.75	82.93	20.93	77.08	25	77.57	35.71	83.72	22.22	80.22	37.5	65.57	20.93	72.55	23.71	70.18	31.03	75	17.24	78.82	16.98
APBA2	HsaINT0010308	chr15:29108390-29113875	5486	chr15:29108270-29108389=29113876-29114016:+	IR-C	8	53.04	12.73	76.47	10.14	59.46	30	75.34	14.29	73.03	8.77	61.54	15.38	65.81	24.44	16.16	61.88	13.46	60.94	6.72	51.42	15.18	46.79	9.8	52.11	6.03	48.81	11.7	56.99	18.01	58.72	5.67	34.89	8.86	28.3	5.02	24.2	8.12	36.42	5.26	31.98	4.79	31.42	6.1
APBA2	HsaINT0010316	chr15:29101785-29105378	3594	chr15:29101599-29101784=29105379-29105558:+	IR-C	7.41	73.91	6.49	78.95	2.33	60.61	4.76	71.93	2.44	70.67	11.36	89.19	9.86	57.69	16.98	16.51	73.61	14.29	68.88	7.78	65.31	13.04	69.91	11.76	56.44	11.96	60.8	13.85	66.67	18.67	61.8	6.27	32.65	11.17	33.82	10.51	31.65	7.29	39.73	10.05	35.56	8.34	43.1	6.15
APBA3	HsaINT0010322	chr19:3759601-3759688	88	chr19:3759689-3760301=3759561-3759600:-	IR-S	21.85	57.2	22.11	44.36	14.51	55.32	24.41	30.27	22.88	58.24	25.56	66.97	22.88	63.01	5.73	33.87	52.74	25.72	42.98	32.64	58.1	48.99	73.28	37.33	54.35	40.8	44.69	25.61	52.51	26.21	44.41	41.8	60.21	50.66	58.64	67.49	60.99	36.98	60.25	47.29	46.69	47.04	79.88	37.25
APBA3	HsaINT0010323	chr19:3754341-3759560	5220	chr19:3759561-3759600=3754195-3754340:-	IR-C	21.54	71.69	20.58	54.25	8.21	54.95	14.09	58.49	15.51	85.28	19.87	80.73	14.17	61.86	12.28	20.75	78.88	48.15	68.79	44.59	63.29	40.96	73.04	27.5	42.45	39.77	63.51	20.38	58.93	54.98	61.46	36.65	58.31	40.36	47.79	40.36	49.02	28.85	63.01	17.51	54.17	43.35	57.69	29.6
APBA3	HsaINT0010328	chr19:3751554-3752507	954	chr19:3752508-3752720=3751434-3751553:-	IR-S	2.36	52.17	3.8	45.04	0	56.39	4	55.22	2.04	74.07	6.06	69.23	11.54	56.64	10.34	11.11	58.97	28	49.66	13.13	52.48	15.49	50.81	21.88	53.49	25	69.09	20	61.29	21.05	61.82	19.23	37.97	13.43	45.81	18.68	39.13	14.04	39.51	14.29	42.86	10.81	42.08	3.33
APBB3	HsaINT0010375	chr5:140563916-140564196	281	chr5:140564197-140564604=140563752-140563915:-	IR-S	26.32	52.27	44.44	55.17	45.45	67.82	33.33	59.46	52.94	62.14	39.13	50.33	40.74	60.31	42.86	34.15	73.38	35.63	70.06	27.87	63.74	20.95	63.64	37.37	60.08	26.98	66.51	33.33	65.62	36.59	65.87	20.09	50.94	26.43	55.61	20.42	45.32	21.8	57.21	26.52	54.35	19.87	64.49	15.74
APBB3	HsaINT0010379	chr5:140562724-140563593	870	chr5:140563594-140563670=140562663-140562723:-	IR-C	20	77.62	50	64.71	0	72.88	83.33	74.05	55.56	66.84	60	71.85	23.08	70.97	33.33	37.5	91	39.73	85	45.65	80.15	20	78.74	30.91	72.97	32.31	78.82	48.28	75	52.24	88.83	16.67	54.27	16.88	62.83	14.16	55.3	16.13	55.05	17.56	55.56	25.16	67.61	11.5
APC2	HsaINT0010404	chr19:1458061-1460180	2120	chr19:1457965-1458060=1460181-1460320:+	IR-S	100	81.82	100	33.33	72.73	36	66.67	13.33	100	23.08	83.33	29.41	100	100	100	93.55	54.29	47.37	41.54	65.85	40.68	9.21	14.17	25.49	20	36	27.08	91.84	67.44	56.25	62.5	1.92	8.14	0.42	8.03	0.24	6.75	0.61	7.66	2.05	4.6	0.75	8.35	1.08
APC2	HsaINT0010405	chr19:1460321-1460779	459	chr19:1460181-1460320=1460780-1460857:+	IR-S	71.43	41.18	25	9.68	46.67	13.04	0	9.52	60	40	50	20.93	100	13.04	100	63.64	40.74	20.93	20	42.86	35.09	5.26	15.57	15.25	13.33	26.83	24.56	48.57	35.85	37.5	33.33	0.71	11.16	1.24	13.73	2.67	8.57	1.47	11.42	1.11	10.93	1.53	12.15	0.9
APC2	HsaINT0010416	chr19:1457244-1457964	721	chr19:1456853-1457243=1457965-1458060:+	IR-S	100	91.3	77.78	100	66.67	100	100	79.49	20	100	100	93.55	100	100	100	73.91	100	73.33	76.27	40.54	73.77	31.71	76.52	50	70.37	62.79	82.98	56.25	78.18	52.38	70.37	30.68	66.97	46.55	67.16	12.8	41.55	36.76	66.43	35.01	64.39	34.24	65.92	26.98
APH1A	HsaINT0010455	chr1:150266195-150266532	338	chr1:150266533-150266656=150265399-150266194:-	IR-S	60.15	60	60.52	47.87	59.77	68.68	58.46	53.37	64.8	52.42	62.59	57.45	66.12	57.89	53.36	60.46	59.32	67.17	57.24	50.3	59.79	64.31	65.02	63.92	67.82	63.03	54.06	47.52	56.05	46.26	62.97	68.54	61.1	61.03	57.4	58.56	62.31	50.66	61.42	65.07	56.28	65.26	74.33	53.82
APOE	HsaINT0010655	chr19:44905842-44906601	760	chr19:44905782-44905841=44906602-44906667:+	IR-S	0.83	4.07	1.04	1.66	0.98	1.63	0.86	3.05	0.78	3.17	1	4.49	1.24	1.94	0.95	22.73	63.38	25	85.96	36.84	76	50	79.49	11.11	36.59	7.89	47.06	38.78	71.43	16.67	41.33	55.56	100	66.67	100	42.86	70	100	100	33.33	90.91	40.74	90.48	30.77
APPBP2	HsaINT0010736	chr17:60479272-60494465	15194	chr17:60494466-60494617=60479148-60479271:-	IR-S	31.37	100	14.63	40.68	10.87	47.76	10.26	69.57	10.26	59.4	16.38	76.19	53.33	87.97	12.06	18.6	50.14	14.41	57.83	5.75	16.25	1.45	0	0	0	3.99	6.13	9.54	12.06	12.5	54.03	0	31.37	0	0	0	0	1.73	5.41	2.96	10.26	0	10.26	0
APTX	HsaINT0010789	chr9:32989896-33001332	11437	chr9:33001333-33001576=32989759-32989895:-	IR-C	16.67	100	66.67	86.67	11.11	77.78	33.33	50	33.33	46.67	100	88.89	100	100	45.45	60	100	100	100	55.56	50	0	66.67	40	66.67	77.78	73.33	71.43	80.95	100	100	16.67	55.56	14.29	73.33	5.88	33.33	27.27	27.27	15.79	33.33	11.11	66.67	0
ARAF	HsaINT0010916	chrX:47565140-47565251	112	chrX:47564985-47565139=47565252-47565350:+	IR-S	2.54	44.48	3.55	37.36	2.8	42.17	2.41	43.7	1.88	48.72	3.21	48.85	6.1	31.81	4.5	3.61	24.35	3.35	34.6	7.52	39.17	4.87	47.27	9.06	39.59	6.98	60.59	3.18	33.93	3.7	17.86	31.56	49.4	30.05	55.76	32.19	47.71	28.83	56.47	13.74	62.53	21.84	58.75	19.05
ARAF	HsaINT0010917	chrX:47565351-47566638	1288	chrX:47565252-47565350=47566639-47566780:+	IR-S	3.66	60.26	1.96	61.49	2.59	50	8.33	44.06	3.17	50	2.1	59.12	2	46.22	4.82	5.81	29.69	9.91	34.75	4.7	31.62	13.21	36.51	5.17	24.18	4.35	39.57	6.9	25.19	3.09	27.69	19.05	62.5	20.69	49.33	17.65	44.74	23.33	55.14	21.74	43.86	19.57	43.07	19.4
ARAP1	HsaINT0010950	chr11:72712569-72713175	607	chr11:72713176-72713243=72712438-72712568:-	IR-S	0	30.52	0.84	32.76	2.03	27.39	1.87	31.85	0.86	32.42	0	33.67	1.26	28.39	0.96	0	57.72	2.16	50.26	2.07	64.8	10.08	71.22	2.7	31.6	6.79	49.97	9.51	54.74	0	40.38	24.46	78.35	17.75	74.64	66.02	62.19	32.69	75.58	9.74	67.68	12.19	64.76	7.97
ARF6	HsaINT0011058	chr14:49893158-49893255	98	chr14:49893018-49893157=49893256-49897054:+	IR-S	5.33	13.04	5.26	16.05	5.33	11.11	3.78	13.85	5.56	7.69	5.08	12.5	4.05	16.67	4.95	5.71	12.09	24.82	20.88	7.39	15.84	12.97	37.14	13.08	20.83	46.67	34.88	27.27	48.57	14.04	20.79	14.89	26.5	24.79	27.59	13.04	14.4	20.87	25.2	22.6	26.72	32.18	33.33	27.75
ARFGAP1	HsaINT0011060	chr20:63284923-63285653	731	chr20:63284866-63284922=63285654-63285713:+	IR-S	0	20.78	0	24.83	0.75	28.91	2.65	30.79	0.85	27.75	4.76	31.08	0	26.25	4.29	18.52	76.43	33.33	69.61	16.8	53.65	10.26	42.05	4.44	37.31	7.41	40.82	14.85	52.57	24.27	71.63	3.57	24.06	3.12	25.08	2.75	27.97	5.62	34.4	0	29.76	4.05	29.19	3.7
ARFGAP1	HsaINT0011061	chr20:63285714-63286365	652	chr20:63285654-63285713=63286366-63286442:+	IR-C	36.64	96.45	32.85	97.01	31.01	96.83	25.76	98.66	37.59	97.09	44.87	98.41	52.67	96.75	45.57	78.42	99.54	73.76	98.23	63.29	97.58	54.36	98.37	50.91	95.91	50.33	97.21	67.57	96.95	79.84	99.11	79.66	98.96	50	96.16	100	100	82.35	100	16.67	97.86	35.57	91.6	60
ARFGAP1	HsaINT0011068	chr20:63281348-63282818	1471	chr20:63281291-63281347=63282819-63282851:+	IR-S	1.59	39.39	11.95	46.15	2.36	50.73	1.11	46.89	9.73	53.49	6.55	57.26	0	45.85	8.17	14.71	61.67	10.3	53.42	14.92	58.63	12.47	59.89	17.89	52.95	14.78	55.71	17.18	55.79	36.44	65.98	8.3	39.79	5.72	30.77	12.39	43.27	6.49	37.17	0.71	33.22	8.23	41.33	4.82
ARFGAP1	HsaINT0011069	chr20:63282852-63284865	2014	chr20:63282819-63282851=63284866-63284922:+	IR-C	19.11	78.85	16.07	83.96	17.63	82.11	21.43	85.3	26.03	86.37	20.7	86.98	29.53	81.59	28.31	53.59	93.71	44.59	93.7	43.34	89.95	47.78	91.1	31.71	86.42	44.32	84.51	50.34	90.66	56.76	94.32	41.81	85.7	48.58	82.45	50.77	82.44	40.74	86.32	33.2	86.99	31.41	87.93	32.48
ARFGEF1	HsaINT0011131	chr8:67203252-67204679	1428	chr8:67204680-67204819=67203083-67203251:-	IR-S	2.04	50	2.82	26.76	5.98	22.58	5.68	45.79	2.67	18.07	5.1	37.04	5.62	40	8.38	43.75	78.18	30.16	65.08	24.32	57.14	17.07	42.22	10	60	13.73	35.85	15	38.98	30.86	60.56	5.71	39.73	21.28	40.74	11.11	29.82	22.22	34.78	14.29	25.81	12	35.14	7.94
ARFRP1	HsaINT0011195	chr20:63707093-63707866	774	chr20:63707867-63708003=63706999-63707092:-	IR-C	20	58.49	30.43	54.84	17.95	23.08	15.38	72.09	29.58	25.93	29.63	54.55	14.29	38.1	17.07	28.57	86.97	22.33	82.81	21.57	70.24	43.56	65.04	26	30.43	9.09	62.83	16.67	58.52	40.51	81.28	43.69	76.67	48.94	69.23	23.71	54.55	44.76	83.03	17.89	56.76	24.24	64.58	25.58
ARGLU1	HsaINT0011220	chr13:106557132-106559431	2300	chr13:106559432-106559657=106557048-106557131:-	IR-S	59.18	97.96	57.26	96.58	63.36	96.72	68.86	97.62	60.2	98.04	67.72	94.97	59.2	97.33	73.8	85.47	94.73	88.57	96.03	80.49	96.67	81.99	96.94	78.75	95.33	78.7	96.1	84.16	95.89	86.87	96.21	73.16	88.06	82.77	93.93	78.6	89.43	71.74	87.74	77.12	90.26	74.13	93.26	73.31
ARHGAP12	HsaINT0011278	chr10:31810748-31812706	1959	chr10:31812707-31812823=31810649-31810747:-	IR-S	9.52	58.82	9.09	33.33	8.47	62.16	4.76	60.87	2.86	31.82	9.8	57.14	2.22	47.83	9.43	50	63.64	29.41	61.9	12.5	35.29	3.03	25	20	18.18	17.07	33.33	21.43	47.37	38.46	58.62	8.11	40	0	38.46	10.53	29.41	5.26	39.13	33.33	29.41	7.14	6.67	2.86
ARHGAP17	HsaINT0011322	chr16:24954731-24959670	4940	chr16:24959671-24959752=24954603-24954730:-	IR-C	0	0	0	13.64	1.72	11.54	0	15.38	0	3.33	1.2	18.92	0.84	20	3.92	14.52	53.12	21.8	55.84	16.13	48.2	13.73	68	13.18	36.73	11.84	44.93	18.46	52.11	18.18	44.44	32.2	60	28.77	44	35.14	57.89	31.82	66.67	25	47.37	24.59	85.19	15.79
ARHGAP33	HsaINT0011549	chr19:35787560-35787643	84	chr19:35787168-35787559=35787644-35788822:+	IR-S	58.49	53.58	54.55	50.4	36.67	46.27	46.48	39.82	38.27	51.19	58.33	57.66	51.43	52.43	44.44	40.59	60.35	43.62	65.31	32.1	51.22	42.67	54.9	54.35	53.75	34.88	50.68	44.79	55.23	41.87	63.74	67.68	71.6	70.54	72.85	54.42	67.29	44.81	67.02	59.5	71.06	62.52	74.8	72.73
ARHGAP39	HsaINT0011588	chr8:144537814-144545248	7435	chr8:144545249-144545810=144537721-144537813:-	IR-S	0	31.03	2.13	47.62	15.15	60	14.29	36.59	0	33.33	0	73.68	0	34.88	3.45	18.18	30.43	18.52	60	3.45	54.61	11.54	48.57	8.7	51.35	20	50	15.38	49.15	0	52	29.73	84.62	60	70.37	75	90	47.37	78.46	37.5	76.27	38.46	72.22	38.46
ARHGAP39	HsaINT0011589	chr8:144534203-144537720	3518	chr8:144537721-144537813=144534129-144534202:-	IR-S	3.03	40.54	2.13	36.51	1.64	45.1	0	25.71	2.7	50.54	4.35	44.44	4.17	31.03	7.14	12.5	64.44	60	75.51	5.26	44.28	27.27	54.39	15.79	50.44	13.04	57.89	16.13	63.64	6.67	60.98	50	82.8	72.41	84.5	57.89	91.43	42.86	90.65	41.67	77.1	64.71	93.28	69.23
ARHGAP4	HsaINT0011600	chrX:153910405-153910505	101	chrX:153910506-153910611=153910171-153910404:-	IR-S	14.29	75.39	10.34	70.78	5	72	13.39	72.18	18.92	78.25	4.44	61.87	17.17	74.79	14.85	25	50	20	56.36	0	60	4.76	63.64	25	58.62	25	66.1	14.29	70.37	17.65	48.84	9.09	48.57	14.29	43.18	38.46	61.29	45.45	61.11	0	53.62	20	53.33	12.5
ARHGAP4	HsaINT0011613	chrX:153913303-153913408	106	chrX:153913409-153913600=153913218-153913302:-	IR-S	0	22.63	0	20.6	3.33	29.76	1.75	29.48	0	24.59	0	29.67	0	17.7	5.08	0	26.09	50	60	0	33.33	25	47.37	33.33	33.33	9.09	38.46	14.29	40	33.33	48.15	0	30	60	64.71	33.33	63.64	25	44.44	0	58.82	9.09	75	6.67
ARHGAP44	HsaINT0011661	chr17:12980234-12984530	4297	chr17:12980058-12980233=12984531-12984908:+	IR-S	7.94	85.19	10	55.56	0	75	12.5	46.43	8.57	61.29	9.43	73.91	16	56.52	11.63	6.25	30	5.88	33.33	0	36.36	5.26	11.11	3.45	11.11	0	18.18	6.67	20	9.09	57.14	10.34	17.65	14.29	27.27	13.04	25	30	33.33	8	33.33	5.56	33.33	0
ARHGAP44	HsaINT0011663	chr17:12984909-12990031	5123	chr17:12984531-12984908=12990032-12991643:+	IR-S	5.88	83.87	20	57.14	14.89	55.1	13.98	89.19	4	62.79	16.67	81.4	10	55.93	20	45.45	92.59	15.38	51.22	13.51	59.26	27.27	50	20	47.83	33.33	58.82	37.93	55.56	13.33	51.52	17.65	56.52	7.69	75	16.13	45.45	7.69	45.45	13.04	30.23	13.04	60	4.35
ARHGDIA	HsaINT0011717	chr17:81869958-81870635	678	chr17:81870636-81870914=81869741-81869957:-	IR-C	9.09	87.01	15.79	80	28.57	82.86	20	82.22	40.74	86.92	33.33	92.11	25	93.68	36.84	42.86	77.01	35.71	65.22	26.83	73.66	33.33	75.92	50	74.31	57.89	73.33	20	83.91	26.67	75	24.32	63.38	44.83	77.59	40.35	61.75	40.85	75.76	34.78	63.16	22.5	73.95	23.08
ARHGEF1	HsaINT0011739	chr19:41896483-41898441	2035	chr19:41896377-41896482=41898442-41898587:+	IR-C	1.82	59.67	1.56	65.98	2.36	72.86	0	76.79	3.03	69.72	3.85	67.18	2.61	64.48	1.47	13.89	76.47	18.18	83.22	3.57	77.26	8.47	73.5	8.86	72.92	17.39	80.95	13.79	76.47	15.66	69.01	48.72	89.88	47.37	94.47	62.5	94.55	68	87.9	36	94.81	23.53	89.13	33.33
ARHGEF1	HsaINT0011758	chr19:41892124-41892330	207	chr19:41892025-41892123=41892331-41892373:+	IR-C	0	75.82	2.86	62.75	7.69	58.62	7.41	63.5	1.3	68.85	2.33	71.68	5.88	56.76	5.26	14.29	75.38	10	76.62	14.29	65.22	2.86	60.68	0	50	0	48.62	30.43	60.47	6.25	72.31	5.88	47.92	33.33	31.18	16.67	47.62	4.76	48.98	6.67	36.45	6.67	37.98	15.38
ARHGEF10	HsaINT0011770	chr8:1903452-1905570	2119	chr8:1903281-1903451=1905571-1905716:+	IR-C	25.93	75.32	29.79	70.51	10.98	63.39	35.48	83	18.09	62.81	22.98	79.28	23.24	85.07	27.81	30	82.02	36.84	83.1	21.43	71.43	25	73.58	25.42	47.13	17.65	52.08	29.58	71.65	40	73.21	22.58	52	36	55.56	20	50	11.76	80	20	25	25.71	62.96	24.14
ARHGEF11	HsaINT0011849	chr1:156938514-156939547	1034	chr1:156939548-156939910=156938418-156938513:-	IR-S	25	100	100	100	68.42	100	100	100	100	100	100	98.61	100	100	77.78	21.74	81.82	10.89	75.42	9.47	72.14	9.91	66.13	7.07	71.55	5.51	63.37	14.29	79.58	13.95	78.74	2.2	27.2	3.18	31.82	5.48	29.68	2.54	39.67	4.76	35.37	2.2	46.34	2.5
ARHGEF11	HsaINT0011850	chr1:156937497-156938417	921	chr1:156938418-156938513=156937249-156937496:-	IR-S	75	97.67	100	98.41	66.67	95.9	84.62	100	80	99.46	100	100	100	100	83.33	26.67	83.93	18.1	66.28	8.06	55.23	9.59	61.17	7.69	41.23	5.26	50.19	6.12	62.14	12.31	75.23	1.64	19.64	1.19	20.73	3.48	22.99	0.84	21.94	1.4	21.31	2.02	25.85	0.91
ARHGEF17	HsaINT0011939	chr11:73363834-73364171	338	chr11:73363747-73363833=73364172-73364239:+	IR-S	21.74	65.52	33.33	43.75	33.33	57.89	33.33	60	0	51.92	4.76	54.43	20	30.16	28.57	26.76	64.46	27.54	58.74	25	63.06	20.75	62.83	18.75	48.21	22.22	53.6	35.59	53.94	40	62.07	23.64	52.94	11.86	56.76	24.05	62.89	32.31	64.23	20	69.23	24.14	60.53	16.67
ARHGEF17	HsaINT0011941	chr11:73364601-73365389	789	chr11:73364452-73364600=73365390-73365564:+	IR-S	12.5	54.55	22.22	47.92	12.5	50.94	9.09	58.62	15.38	57.72	20	58.02	14.29	65.08	14.29	5.79	43.35	10.84	48.6	13.89	49.67	11.63	59.6	21.05	51.03	21.74	51.17	15.29	49.89	5.69	37.12	17.95	55.41	26.67	66.4	12.36	50.8	20	70.71	17.53	64.29	23.64	64.8	13.33
ARHGEF17	HsaINT0011945	chr11:73353013-73355532	2520	chr11:73352830-73353012=73355533-73355649:+	IR-S	33.33	40	15.79	36.59	20	36.17	0	63.64	100	51.61	15.79	61.9	100	17.65	25	17.07	60.89	28.89	62.56	9.68	54.77	17.95	44.16	6.98	48.53	9.09	46.96	11.11	56.52	30.43	60.91	11.11	27.66	3.45	22.58	8.33	42.31	8.7	47.17	0	38.46	8.33	33.33	0
ARHGEF18	HsaINT0011961	chr19:7470316-7470536	221	chr19:7470126-7470315=7470537-7472485:+	IR-S	77.22	65.96	65.31	79.31	84.62	72.31	87.23	87.5	79.59	87.23	92.59	96.72	82.52	86.67	82.35	76.74	69.57	70.21	67.27	87.8	76.6	81.25	78.08	86.89	88.89	83.33	75	79.55	88.57	67.35	86.21	58.76	74.55	53.72	61.4	76.47	94.59	84.62	100	56.41	86.96	73.47	73.58	74.76
ARHGEF19	HsaINT0011975	chr1:16199255-16201781	2527	chr1:16201782-16201861=16199150-16199254:-	IR-S	6.04	44.73	3.06	48.86	6.19	47.91	3.33	46.14	4.19	57.68	3.11	59.82	7.51	45.67	7.28	50	73.68	28	67.16	28.81	65.79	25	65.96	25.71	67.68	23.81	65.52	53.85	65.85	18.52	47.37	26.32	52.94	37.5	75	9.09	68	45.45	63.16	24.14	72.09	42.86	80	6.67
ARHGEF2	HsaINT0011987	chr1:155969301-155978066	8766	chr1:155978067-155978175=155969156-155969300:-	IR-C	100	100	40	87.5	33.33	100	100	83.33	20	100	100	100	100	100	100	60	60	38.89	47.83	47.37	68.57	17.07	42.86	36.84	53.19	31.82	54.84	66.67	69.23	33.33	51.72	4.35	7.69	4.5	7.89	2	11.76	10.87	11.11	1.23	10.45	6.52	8.86	5.71
ARHGEF4	HsaINT0012093	chr2:131041463-131041814	352	chr2:131041230-131041462=131041815-131041944:+	IR-S	13.04	82.09	25	82.3	8.33	86.41	28.57	90.28	41.18	87.83	33.33	82.86	4	87.93	15.79	33.33	85.98	44.44	84.35	9.09	83.63	20	90.91	25	86.67	33.33	81.44	26.67	86.67	12	83.61	19.15	81.25	21.21	69.77	11.11	72.84	21.74	84.47	12.2	79.38	10	70.37	12.5
ARHGEF40	HsaINT0012104	chr14:21085867-21087000	1134	chr14:21085689-21085866=21087001-21087105:+	IR-C	6.85	52.14	12.5	48.55	3.03	48.44	11.3	52.54	6.38	54.21	4.65	58.71	7.02	44.26	10.09	15	58.87	20	70.3	19.33	63.93	17.24	68.18	17.5	52.76	16.8	60.5	23.81	54.42	20.83	70.65	14.29	55.06	20	58.14	27.27	47.97	19.33	45.37	12	53.04	15.89	48.02	16.05
ARHGEF40	HsaINT0012106	chr14:21087106-21087319	214	chr14:21087001-21087105=21087320-21087463:+	IR-S	19.05	74.81	21.43	72.24	25.37	77.66	26.53	72.93	26.15	87.67	22.58	79.52	18.18	79.44	27.54	52.94	82.86	47.95	85.96	31.91	86.97	59.18	90.38	40.62	79.74	40	82.66	46.34	88.06	47.37	86.67	54.29	85.94	66.67	87.5	70	90.62	65.96	84.76	63.64	93.33	56.76	94.07	41.94
ARHGEF40	HsaINT0012107	chr14:21087464-21087967	504	chr14:21087320-21087463=21087968-21088098:+	IR-S	24.59	68.56	12.68	60.52	23.08	65.55	13.73	60.63	11.54	69.96	25.58	60.58	18.18	66.99	27.27	46.15	81.25	41.54	85.39	37.04	80.51	48.28	81.91	31.15	71.59	47.83	73.61	34.62	74.1	62.5	83.02	47.62	88.24	48.94	91.67	80.95	92.21	61.9	95.88	52.63	88.24	56.25	85.45	33.33
ARHGEF7	HsaINT0012158	chr13:111280351-111280537	187	chr13:111280272-111280350=111280538-111280677:+	IR-S	6.15	50.91	2.55	50.53	14.09	58.58	10.22	58.58	8.44	48.53	16.02	47.83	4.02	40.51	14.51	40.04	83.63	47.96	90.73	34.05	61.84	25.34	72.57	26.83	60.96	20.99	54.1	26.61	60.51	36.77	73.65	16.42	62.26	23.32	36.77	26.68	35.12	17.61	41.16	22.91	58.17	11.04	52.66	9.35
ARHGEF7	HsaINT0012159	chr13:111280678-111283138	2461	chr13:111280538-111280677=111283139-111283363:+	IR-C	10	71.43	8.7	62.11	11.5	58.68	17.19	85.37	12	57.75	15.79	77.78	17.39	73.91	15.89	54.84	72.26	51.46	74.6	36	62.9	35.03	78.88	27.08	57.58	37.7	62.09	41.33	63.87	39.24	85.12	11.6	39.81	11.67	27.73	12.57	36.94	19.71	55.41	10.6	32.17	11.97	37.72	14.92
ARID2	HsaINT0012235	chr12:45893722-45904933	11212	chr12:45893630-45893721=45904934-45908036:+	IR-C	0	84.21	4.35	54.17	10.26	56.36	3.8	83.33	4.62	62.96	18.18	62.96	12.36	67.65	15.22	24	42.22	22.03	73.68	18.75	51.02	8.43	57.14	17.46	60	9.68	37.5	9.24	66.67	23.33	63.64	5.08	29.41	7.04	15.79	10.53	13.04	0	9.68	5.88	37.14	8.7	23.81	2.13
ARL10	HsaINT0012362	chr5:176368983-176371721	2739	chr5:176368807-176368982=176371722-176373500:+	IR-C	10.53	33.33	14.29	68.42	10.53	41.67	5.26	40	26.67	60	0	71.43	7.69	60	11.63	10.14	35.48	8.82	45	13.64	39.73	24.07	44.19	20	46.94	11.86	38.89	9.09	42.31	24.44	19.23	12.28	50	20	38.46	16.58	47.83	14.67	27.27	21.74	45.83	21.52	47.83	12.75
ARL16	HsaINT0012390	chr17:81682150-81683012	863	chr17:81683013-81683126=81682034-81682149:-	IR-C	17.19	79.71	19.23	58.01	10.6	60.63	8.13	75.76	10.58	74.55	9	63.64	19.3	82.76	16.83	17.11	28.12	9.2	37.04	17.31	45.65	18.1	58.42	15.08	42.61	14.53	49.06	10.94	53.85	12.2	29.03	14.56	41.33	21.97	41.94	17.77	37.66	16.1	36	11.84	35.38	18.18	40.74	16.25
ARL6IP4	HsaINT0012438	chr12:122980746-122981128	383	chr12:122980333-122980745=122981129-122981266:+	IR-C	4.09	41.22	2.33	36.13	6.58	30.97	1.52	42.27	5.13	31.48	2.86	20.34	3.57	35.35	5.11	4.67	41.02	7.38	38.21	6.3	42.76	16.54	48.99	7.53	37.33	14.75	39.64	6.35	40.21	6.29	25.89	23.93	55.68	23.08	55.23	23.28	46.63	23.57	60.59	14.79	49.39	10.79	46.9	8.42
ARMC5	HsaINT0012537	chr16:31465983-31466078	96	chr16:31465850-31465982=31466079-31467167:+	IR-S	17.07	65.56	25	63.44	19.05	73.17	6.38	64.6	22.58	74.03	6.67	75	23.08	66.07	21.05	14.29	50	16.98	51.72	26.32	58.44	33.33	60	17.95	44.58	25	57.14	13.21	58.62	12.2	35.21	5.56	47.52	21.21	49.15	17.07	45.68	17.39	40.8	10.17	37.57	13.04	43.82	9.33
ARMCX2	HsaINT0012593	chrX:101659149-101659418	270	chrX:101659419-101659501=101659076-101659148:-	IR-C	16.28	83.53	22.85	71.62	20.47	76.92	15.02	70.2	14.56	76.02	26.15	78.65	22.58	73.37	18.56	18.72	76.42	41.32	68.63	39.09	80.33	32.71	71.43	26.72	87.19	44.13	83.11	45.18	84.91	26.72	62.5	37.87	57.16	42.17	68.63	33.28	62.21	32.35	61.24	32.11	68.28	47.07	66.88	30.02
ARMCX3	HsaINT0012597	chrX:101623431-101623785	355	chrX:101623361-101623430=101623786-101623893:+	IR-C	48.39	100	100	100	100	100	65.59	89.09	61.9	100	100	100	100	100	100	86.81	96.96	100	100	93.55	87.43	82.98	100	80.49	100	62.96	100	68.32	100	89.68	100	71.19	91.29	80.62	88.54	67.93	93.88	86.76	98.44	78.88	86.25	74.74	95.93	77.9
ARMCX5	HsaINT0012617	chrX:102601033-102601463	431	chrX:102600920-102601032=102601464-102601509:+	IR-C	11.11	45.45	0	100	53.85	71.43	6.67	71.43	14.29	50	27.27	80	75	50	11.11	57.89	100	100	100	63.64	86.67	40	89.47	50	87.5	61.9	69.23	53.85	100	65.22	100	53.33	88.24	75	66.67	75	75	66.67	77.78	57.14	77.78	77.78	100	47.37
ARMCX6	HsaINT0012620	chrX:101616767-101617884	1118	chrX:101617885-101618001=101615118-101616766:-	IR-C	39.91	100	100	100	100	93.21	100	97.29	72.66	100	100	100	100	100	100	68.89	100	50.82	91.4	63.92	100	81.58	81.87	39.91	100	100	92.78	100	94.9	18.13	100	71.98	97.63	89.86	100	79.01	86.11	72.66	96.74	63.92	84.16	61.45	100	84.16
ARMCX6	HsaINT0012622	chrX:101617371-101617502	132	chrX:101617503-101617584=101617283-101617370:-	IR-C	19.85	85.16	24.73	85.58	45.31	90.59	24.6	78.86	49.64	100	39.48	81.35	49.4	88.09	15.54	57.7	61.28	25.53	87.71	22.74	76.73	19.92	85.37	13.93	74.37	36.6	87.33	24.82	78.47	12.19	59.71	32.85	86.38	51.45	81.98	31.62	75.31	46.93	96.68	43.17	84.86	39.13	87.35	40.36
ARRB2	HsaINT0012813	chr17:4716034-4716411	378	chr17:4715973-4716033=4716412-4716608:+	IR-C	33.33	100	33.33	95.74	27.27	95.12	14.29	91.84	33.33	100	33.33	100	100	100	60	41.67	92.59	21.74	94.9	10.34	90.86	50	100	7.69	89.87	42.86	89.8	63.64	93.1	14.29	96.39	11.11	79.66	16.22	76.81	24.64	79.14	13.85	71.05	27.54	78.77	14.29	71.75	12.68
ARRDC1	HsaINT0012820	chr9:137605836-137612895	7060	chr9:137605644-137605835=137612896-137613006:+	IR-C	0	17.91	4	30.96	3.85	25.13	3.3	21.84	0	34.38	8.33	31.16	0	34	2.56	4.76	27.06	11.11	28.24	9.52	23.37	9.09	36.76	0	19.5	8.57	25.49	7.14	30.43	9.68	44.44	27.66	56.14	33.33	46.79	15.49	43.01	28.95	47.14	23.81	54.95	28	53.85	15.38
ARRDC1	HsaINT0012821	chr9:137613007-137613459	453	chr9:137612896-137613006=137613460-137613510:+	IR-S	18.99	64.49	18.52	68.75	18.42	68.55	15.46	68.46	10.81	68.34	24.68	70.57	14.94	69.81	15.15	26.92	70.37	17.65	68.15	3.7	74.38	25.64	84.31	16.67	67.07	25	66.67	16.67	74.3	17.65	64.81	55.93	77.9	48.57	84.34	62.86	73.87	52.78	80.26	65.52	77.53	52.73	72.73	46.43
ARRDC1	HsaINT0012826	chr9:137615001-137615073	73	chr9:137614559-137615000=137615074-137615360:+	IR-S	34.58	72.99	33.33	60.13	18.6	68.18	24.81	70.45	15.69	66.67	27.1	68.09	29.82	69.57	35.29	33.33	57.58	26.67	57.4	31.58	63.4	33.33	68.95	33.33	55.14	30.23	73.96	22.45	68.98	29.11	68.75	17.81	39.17	34.55	46.32	36.23	54.84	21.74	52.38	32.26	42.7	37.5	51.79	37.7
ARSA	HsaINT0012853	chr22:50627053-50627165	113	chr22:50627166-50627406=50626834-50627052:-	IR-S	8.7	93.51	8.33	88.74	8.7	96.69	11.11	96.88	5.66	95.07	13.33	91.81	24.32	92.22	26.09	12	75.47	26.83	85.84	21.82	86.39	27.5	89.05	27.06	90.94	16.13	87.04	21.35	90.07	18.26	68	49.61	87.85	65.45	81.6	42.86	78.38	47.9	86.48	54.39	86.27	44.19	89.24	31.17
ARSA	HsaINT0012854	chr22:50626761-50626833	73	chr22:50626834-50627052=50626591-50626760:-	IR-S	4.35	56.92	10	79.41	4.55	62.5	0	63.96	9.09	71.65	6.67	72.55	12	55.41	11.76	33.33	80.95	7.14	69	24.64	67.16	20	75.27	26.47	71.75	14.71	65.98	14.29	58.42	12.5	63.64	23.81	52.7	37.35	52.23	18.52	57.6	20	60.41	24.49	62.02	25.64	62.45	15.97
ARVCF	HsaINT0012972	chr22:19982092-19990584	8493	chr22:19990585-19990812=19981933-19982091:-	IR-S	9.09	44.07	0	37.26	3.23	39.58	33.33	36.15	22.22	45.97	8.57	41.07	11.11	42.27	17.65	55.56	84.48	50	78.14	30	78.37	80	84.24	38.46	64.79	46.67	71.95	64.65	71.43	47.37	78.13	27.27	67.06	33.28	59.42	19.35	46.02	30.1	64.59	27.27	55.11	17.65	64.09	22.08
ARVCF	HsaINT0012974	chr22:19980243-19981210	968	chr22:19981211-19981737=19979743-19980242:-	IR-S	25.42	82.93	51.11	87.03	21.62	80.59	29.87	84.24	18.52	82.67	11.11	83.8	36.84	86.07	26.83	43.82	86.08	35.65	88.61	23.66	77.38	30.94	76.49	20	73.59	44	79.84	49.25	86.85	49.47	92.51	21.65	67.15	29.96	68.82	25.2	66.46	22.46	65.67	15.36	69.4	26.4	75.37	20.62
ARVCF	HsaINT0012975	chr22:19979081-19979742	662	chr22:19979743-19980242=19978897-19979080:-	IR-C	16.52	89.39	13.33	92.06	13.67	87.33	14.58	93.66	16.36	93.13	23.81	90.4	17.31	89.78	27.62	27.13	85.35	14.92	87.95	26.32	84.36	26.24	82.73	21.21	79.28	25.64	86.13	36.94	87.44	14.93	87.48	11.43	58.2	14.79	62.2	17.49	66.69	12.2	65.55	8.48	62.55	12.86	65.84	10.27
AS3MT	HsaINT0012983	chr10:102869594-102869804	211	chr10:102869453-102869593=102869805-102869845:+	IR-S	15.34	48.49	19.71	46.13	31.1	36.36	19.97	51.67	21.04	29.97	10.93	19.83	16.3	53.81	25.68	16.37	44.31	20.24	63.46	26.39	52.05	21.02	69.16	24.13	45.77	22.34	27.94	23.27	22	19.79	33.63	13.69	40.82	22.13	46.75	26.74	41.16	20.97	44.32	20.29	35.67	12.79	50.78	16.72
ASAH1	HsaINT0012996	chr8:18075588-18084675	9088	chr8:18084676-18084998=18075541-18075587:-	IR-C	4.35	42.86	17.65	33.33	27.27	33.33	6.67	25	20	0	0	14.29	20	14.29	17.65	37.5	60	23.81	17.65	33.33	18.18	20	11.11	33.33	12.5	13.04	62.5	5.88	60	23.08	33.33	23.53	0	25	14.29	20	23.08	36	25	20	20	17.24	12.5	14.29
ASAH1	HsaINT0013004	chr8:18064532-18067219	2688	chr8:18067220-18067298=18064457-18064531:-	IR-S	65.43	86.36	53.66	87.1	48.3	73.77	49.69	74.65	54.39	46.67	50	72.97	70.77	100	60	61.62	54.55	64	55.56	75.44	80	83.33	60	51.35	41.67	60	85.71	70.21	74.19	66.67	88.24	36.23	44.44	13.04	45.45	30.77	25.93	22.73	47.83	25.49	71.43	42.31	46.67	42.31
ASAH1	HsaINT0013005	chr8:18063231-18064456	1226	chr8:18064457-18064531=18063185-18063230:-	IR-S	9.09	84	0	50	10	52.63	4.55	76.74	2.86	60	6.98	86.67	13.51	76.47	5.56	17.24	100	14.29	50	0	44.44	33.33	100	7.69	25	4.76	71.43	15.79	75	11.11	50	5	50	28.57	50	53.85	27.27	13.04	33.33	11.11	27.27	12.73	20	11.11
ASAP2	HsaINT0013083	chr2:9388547-9393481	4935	chr2:9388294-9388546=9393482-9393647:+	IR-C	0	30.77	0	22.58	1.54	24.14	0	40	7.14	40.74	0	26.32	5.26	28.57	8.57	7.32	19.35	1.82	19.19	8.7	23.68	5.49	18.07	8.33	13.76	10.45	23.08	7.46	20.83	0	24.24	23.08	39.53	21.95	34.48	21.31	12.2	18.03	62.5	15.29	39.53	19.3	37.78	14.29
ASAP3	HsaINT0013106	chr1:23434619-23435850	1232	chr1:23435851-23436028=23434533-23434618:-	IR-S	8.11	87.06	4.35	88.89	15.56	92.11	22.22	95	13.79	91.5	18.18	92.93	7.04	97.75	32.26	20	82	17.95	82.1	20	77.91	3.12	77.09	7.94	66.1	7.25	69.41	13.33	78.64	9.86	89.47	5.41	48.31	2.44	48.28	3.61	56.99	2.63	39.47	2.22	45.45	1.49	50	2.7
ASB6	HsaINT0013200	chr9:129638660-129639201	542	chr9:129639202-129639310=129638573-129638659:-	IR-C	20	81.82	20	81.82	22.81	50	16.42	56.25	25	88.89	26.03	69.23	30.23	67.44	20.69	16.13	71.43	25	55.56	21.74	78.79	44	64.29	26.09	38.46	63.64	50	26.92	34.78	23.08	52.94	20.39	48.39	19.19	45.95	19.59	36	27.27	52.63	28.21	40.35	16.92	37.7	32.26
ASGR1	HsaINT0013295	chr17:7177327-7178493	1167	chr17:7178494-7178588=7177210-7177326:-	IR-C	100	68.89	77.78	76.47	100	77.14	100	70.73	75	76.47	71.43	80.65	100	70.73	73.33	81.82	73.33	100	65.22	81.82	75	83.33	69.49	100	92.31	100	88.89	77.78	70.59	100	75	93.55	82.46	100	73.33	76.74	85.92	82.35	81.18	69.57	78.49	92.31	75.28	94.59
ASH1L	HsaINT0013310	chr1:155521619-155562152	40534	chr1:155562153-155562533=155521100-155521618:-	IR-S	0	45.45	0	45.45	0	10.64	0	40	0	35.71	17.24	8.47	0	100	0	17.24	29.41	29.41	11.36	7.69	58.82	17.24	0	38.46	29.41	24.27	10.64	8.47	38.46	18.52	21.74	21.74	100	10.64	45.45	40	100	0	55.56	35.71	62.5	0	62.5	0
ASH1L	HsaINT0013330	chr1:155459899-155477885	17987	chr1:155477886-155482449=155459797-155459898:-	IR-C	4.76	20	6.67	26.32	8.7	15.38	10.53	26.32	11.11	8.57	16.67	18.18	17.65	40	12.2	27.66	25	6.12	18.75	16.67	22.22	2.7	33.33	11.11	31.03	5.88	42.86	22.22	20	31.71	25.71	0	16.67	2.22	0	0	0	0	0	0	0	0	0	0
ASL	HsaINT0013355	chr7:66075857-66076038	182	chr7:66075789-66075856=66076039-66076093:+	IR-S	23.4	24.53	32	27.71	31.58	29.87	30.23	34.55	17.95	14.75	17.07	16.67	30.43	19.05	30	40.74	22.58	39.39	25.71	40	49.23	33.33	47.22	35.29	24.64	7.69	42.31	17.24	14.29	35.71	25	54.29	66.67	60	45.16	76.74	63.86	34.62	80.95	89.47	54.55	72.41	48.28	58.49
ASL	HsaINT0013369	chr7:66086822-66087333	512	chr7:66086744-66086821=66087334-66087386:+	IR-C	3.45	68.97	7.94	62.82	5.49	58.24	9.52	68.47	3.23	69.37	8.43	65.33	3.16	58.33	9.33	14.89	68.83	38.46	67.65	23.08	65.8	17.39	75.65	10.14	67.57	23.08	60	2.7	61.8	25	60.53	17.86	43.8	19.15	57.5	24.05	50.91	29.17	59.57	17.95	68.75	10.64	65.43	12.24
ASL	HsaINT0013370	chr7:66087387-66087728	342	chr7:66087334-66087386=66087729-66087791:+	IR-S	6.8	78.44	4.13	72.9	5.41	72.15	8.84	89.06	10.34	73.91	9.91	82.51	4.27	76.8	11.76	7.41	87.23	30	83.84	16.88	79.74	24	88.12	20	87.83	14.29	75.47	4.35	83.49	25	79.31	12.5	57.25	36.67	54.55	23.08	73.24	16.46	80.43	25	57.89	21.31	75	15.15
ASPSCR1	HsaINT0013501	chr17:82016870-82016940	71	chr17:82016800-82016869=82016941-82017113:+	IR-S	12.06	64.13	2.29	63.14	15.38	52.09	5.69	74.15	3.85	50.19	14.93	61.08	8.72	62.04	15.45	25.49	78.95	21.67	81.19	24.18	67.45	15.23	80.22	14.29	56.99	19.21	69.96	19.01	73.08	24.81	80.73	6.9	61.82	15	61.59	12.33	59.62	16.52	60.71	11.48	55.89	20	61.74	25.27
ASRGL1	HsaINT0013514	chr11:62389252-62391521	2270	chr11:62389133-62389251=62391522-62391632:+	IR-S	11.63	66.67	15.15	84.31	13.51	74.55	8.33	94.29	17.07	64.86	16.13	72.97	15.7	55.1	19.15	24.09	55.93	16.35	48.91	16.36	63.57	15.79	80.95	15.03	47.32	22.81	71.11	25.88	67.74	20.23	57.58	22.67	45.79	34.5	54.07	28.04	48.33	19.42	48.21	21.03	61.82	25.89	59.72	16.36
ASXL1	HsaINT0013594	chr20:32428423-32429337	915	chr20:32428325-32428422=32429338-32429431:+	IR-S	10	20	0	35.48	5	15.62	14.29	46.34	8.33	17.39	9.09	36	8.11	22.58	4.76	37.08	52.76	17.31	38	16.67	26.04	9.52	21.65	3.3	8.86	2.44	10.53	13.6	30.21	41.46	41.82	0	0	0	5.26	2	3.7	2.38	1.59	1.41	4.55	1.05	3.45	6.42
ASXL1	HsaINT0013595	chr20:32429432-32429900	469	chr20:32429338-32429431=32429901-32430053:+	IR-S	25.71	95.56	33.33	82.14	18.18	87.01	50	88.24	46.15	86.89	39.13	91.84	37.14	73.91	50	59.85	86.53	67.57	89.74	40.33	77.83	39.39	90.12	30.56	80.72	50.75	84.5	44.63	77.2	55.21	81.44	39.23	75.57	48.11	64.89	37.44	54.67	37.78	54.33	33.71	62.12	39.13	79.86	35.79
ASXL1	HsaINT0013596	chr20:32430054-32431320	1267	chr20:32429901-32430053=32431321-32431484:+	IR-S	0	30.43	13.04	58.82	10.2	56.1	47.37	63.64	9.09	55.56	38.46	55.56	21.74	50	25	30.38	58.73	48.05	60.71	27.27	56.73	22.45	49.15	19.54	32.81	28.81	53.85	36.94	58.97	55.56	59.31	11.29	17.14	11.56	21.31	15.22	20	10.84	28.36	10.71	28.4	16.67	29.55	10.3
ATAD3B	HsaINT0013714	chr1:1489275-1490256	982	chr1:1489204-1489274=1490257-1490424:+	IR-S	3.56	68.23	10.52	72.28	3.55	62.59	4.35	82.4	5.88	69.7	2.97	67.36	3.32	68.19	10.91	54.56	93.81	52.71	91.44	36.62	82.77	24.82	72.44	21.69	77.87	25.19	74.23	37.59	85.53	63	90.67	9.66	54.75	14.2	60.29	9.5	54.69	15.31	64.51	7.37	49.9	4.07	53.7	3.7
ATF7IP	HsaINT0013837	chr12:14481186-14496230	15045	chr12:14481003-14481185=14496231-14496343:+	IR-C	9.09	15.79	2.2	20.63	6.67	26.09	7.76	31.43	8.91	22.73	5.61	27.87	8.06	20	11.36	21.05	63.64	17.54	68.42	7.69	11.11	5.26	11.11	2	2.56	2.17	10.64	10.2	25.58	24.19	50.65	1.72	3.85	1.91	1.89	2.22	9.8	0.93	1.89	0.54	1.89	1.45	6.45	0.59
ATG12	HsaINT0013867	chr5:115840935-115841389	455	chr5:115841390-115841851=115840818-115840934:-	IR-C	71.43	77.78	100	84.21	100	94.59	81.82	92.86	47.37	95.92	100	100	100	66.67	92.59	77.05	88.89	93.55	100	65.22	100	77.78	77.78	100	85.71	68.75	91.67	81.4	94.87	73.58	94.59	83.33	100	81.82	68	87.5	100	66.67	89.47	62.5	89.47	58.33	90	77.14
ATG16L1	HsaINT0013910	chr2:233289975-233290247	273	chr2:233289854-233289974=233290248-233290353:+	IR-S	3.03	37.6	4.76	41.79	9.52	43.7	1.75	36.97	6.25	48.34	12	47.46	30.77	51.58	21.43	21.74	52.63	15.38	52.94	17.24	50.77	19.05	54.72	25.93	57.89	9.52	65.85	16.67	53.85	22.22	25.93	12	50.77	10	35.85	6.38	48.94	13.21	51.11	9.09	34.38	14.29	63.64	3.45
ATG16L1	HsaINT0013919	chr2:233273053-233273720	668	chr2:233272966-233273052=233273721-233273777:+	IR-C	0	10	20	15.15	4.76	31.03	5.26	4.76	0	11.86	3.23	18.42	0	13.51	9.09	27.27	100	0	66.67	7.69	84.62	16.67	40	11.11	20	42.86	71.43	14.29	20	25	100	6.67	24.32	6.67	22.22	16.36	10.34	17.95	35	10	20	18.18	35	12
ATG16L2	HsaINT0013936	chr11:72822544-72822847	304	chr11:72822478-72822543=72822848-72822961:+	IR-S	0	61.46	38.46	69.66	16.67	78.51	20	87.28	27.27	71.26	14.29	86.21	0	72.62	42.86	55.56	87.31	44	81.01	46.67	77.16	21.43	64.19	14.29	65	20	64.35	50	79.34	46.67	87.9	0	50.68	0	31.43	0	40.43	33.33	37.31	20	29.82	33.33	36.84	12.5
ATG4B	HsaINT0014046	chr2:241670783-241671311	529	chr2:241670726-241670782=241671312-241671405:+	IR-S	1.47	24.73	1.67	25.14	0.59	19.39	0	27.93	0	17.91	4.76	30.12	1.64	27.41	4.76	13.67	59.92	15.38	65.58	11.11	51.09	16.13	52.72	11.9	51.59	16.83	63.59	14.87	58.15	20.21	65.4	9	51.79	11.36	55.04	7.69	46.28	9.59	47.95	6.52	48.21	6.67	57.65	5.94
ATG4B	HsaINT0014053	chr2:241666839-241668142	1304	chr2:241666645-241666838=241668143-241668221:+	IR-S	1.09	39.16	1.27	55.9	1.02	39.42	3.28	56.11	2.26	46.41	3.91	47.41	2.56	42.35	8.53	16.57	60.15	13.33	53.71	6.72	40.08	5.75	42.51	3.59	29.8	1.89	32.25	8.75	45.93	13.71	57.87	2.13	21.59	2.05	16.24	1.45	15.12	1.42	15.33	1.09	20.35	1.96	18.08	0.68
ATG4D	HsaINT0014066	chr19:10544326-10544782	457	chr19:10543971-10544325=10544783-10544866:+	IR-S	28	9.09	14.29	18.03	16.67	21.43	20	27.78	17.76	26.67	26.09	34.88	25.49	23.08	25	32.2	36.51	40	63.16	10.71	35.59	22.81	37.25	20	57.89	26.67	56.25	24	50	41.46	26.53	20.55	34.38	20.93	35.59	29.9	32.39	23.08	45.21	32	24.64	25.35	28.71	28.79
ATG4D	HsaINT0014069	chr19:10547116-10547188	73	chr19:10546839-10547115=10547189-10547253:+	IR-C	1.45	51.61	4.91	47.22	3.32	52.15	4.52	49.85	6.49	59.73	4.95	49.47	2.51	58.72	5.88	9.77	40.81	23.08	51.76	8.93	56.94	16.76	61.68	23.4	45.73	7.69	70.19	18.55	48.15	28.5	80.33	11.03	52.44	17.58	40.11	13.9	47.42	19.68	63.47	7.53	49.08	11.46	58.7	17.42
ATG9A	HsaINT0014105	chr2:219228054-219229534	1481	chr2:219229535-219229639=219227922-219228053:-	IR-C	9.09	50	7.69	77.78	11.11	80.95	3.45	85.71	17.65	100	0	80.95	8.33	100	10	20	71.43	14.29	90	0	66.04	23.08	46.15	11.11	63.64	5.26	83.33	0	66.67	6.67	53.85	18.75	71.43	16.67	55.56	17.95	48.84	16.13	62.96	18.92	39.39	37.93	76.19	9.09
ATHL1	HsaINT0014139	chr11:290601-290677	77	chr11:290390-290600=290678-291113:+	IR-S	13.51	60.16	18.18	52.22	36.42	55.98	9.74	57.44	16.88	60.33	26.76	56.87	14.67	58.21	51.33	56.76	88.19	11.11	68.84	47.37	65.15	34.69	75.27	32.39	71.64	42.86	67.47	65.22	75.45	32.39	84.56	64.44	82.98	25	62.79	38.46	75.29	23.81	67.32	46.67	71.9	75.76	56.72	66.67
ATHL1	HsaINT0014140	chr11:291114-291975	862	chr11:290678-291113=291976-292095:+	IR-S	53.49	74.76	31.71	75.67	37.04	80.41	32.56	85.81	33.33	70.75	35.85	82.04	55.56	72.92	55.81	40	74.33	73.33	82.1	51.72	77.06	53.85	74.16	28.57	68.95	30	69.92	33.33	72.11	55.56	78.84	25	42.86	33.33	74.26	42.86	65.97	33.33	63.8	50	56.25	9.09	50	40
ATHL1	HsaINT0014144	chr11:293236-293365	130	chr11:293163-293235=293366-293502:+	IR-S	28	42.26	6.67	46.5	20.83	49.07	12.5	46.98	18.75	46.35	25.93	56.78	13.73	38.15	12.5	20	50	7.69	46.61	3.7	48.31	33.33	63.7	0	52.35	15.79	58.01	11.11	47.19	0	36.76	100	53.57	0	50	33.33	56.25	7.69	55.4	0	57.52	33.33	64.42	9.09
ATP11A	HsaINT0014364	chr13:112875942-112878216	2275	chr13:112875776-112875941=112878217-112878303:+	IR-C	50	81.82	22.58	85.45	66.67	95.12	23.08	86.67	42.86	96.15	36.36	100	52.38	100	48.57	36.84	82.35	52	85.45	27.27	78.38	40.91	63.64	22.58	76.74	35.48	66.67	53.85	80.39	36.84	80	5.08	21.21	12.5	10	17.81	48.15	20	39.13	5.56	47.83	12.28	41.18	8.05
ATP2A2	HsaINT0014751	chr12:110346322-110350291	3970	chr12:110346201-110346321=110350292-110351092:+	IR-S	98.54	96.58	94.22	97.47	95.76	97.64	94.51	99.37	96.36	96.31	98.69	96.45	92	98.41	96.53	100	100	100	100	100	100	100	100	99.36	98.37	98.71	100	98.95	100	98.93	100	100	99.34	99.6	100	99.64	100	99.65	100	99.25	100	99.66	100	100
ATP2A3	HsaINT0014776	chr17:3924802-3925395	594	chr17:3925396-3925441=3923875-3924801:-	IR-S	100	100	100	97.35	100	98.15	100	98.15	100	100	100	100	98.39	97.79	98.25	97.59	98.18	93.94	93.94	95.6	95.07	98.44	98.7	100	100	97.75	97.85	94.29	93.02	94.52	100	100	100	100	100	97.56	95.88	100	100	100	100	100	100	96.67
ATP5D	HsaINT0014977	chr19:1244441-1244736	296	chr19:1244315-1244440=1244737-1244825:+	IR-S	33.1	44.34	31.96	41.07	34.29	44.26	33.04	37.24	36.12	34.86	29.47	39.15	29.82	49.88	32.53	27.32	38.58	38.64	43.01	31.64	43.17	44.19	50.38	40.85	37.24	31.67	34	19.9	29.1	22.36	28.81	45.96	43.49	49.85	48.2	52.33	48.67	54.62	48.06	51.79	50.29	52.87	59.46	40.41
ATP5S	HsaINT0015024	chr14:50324117-50325608	1492	chr14:50323945-50324116=50325609-50326228:+	IR-C	20	27.27	20	20	10	38.46	16.13	33.33	18.52	45.45	14.29	27.27	16.67	21.74	12	27.27	22.22	36.59	20	17.65	38.46	16.67	20	35.14	14.29	12	20	9.09	29.41	38.46	42.86	5.88	29.41	41.18	50	30.43	14.29	23.08	11.11	11.11	66.67	25	25	20
ATP5SL	HsaINT0015030	chr19:41432409-41433536	1128	chr19:41433537-41433673=41431318-41432408:-	IR-C	81.48	100	25.74	44.19	26.02	59.09	29.94	77.27	9.57	40.98	82.14	86.67	97.14	77.78	100	100	80	14.29	38.78	18.28	40.85	21.47	50	9.4	23.21	91.3	50	93.55	100	71.43	66.67	58.97	66.67	17.53	22.45	23.24	25.23	11.61	20.37	12.62	10.99	55.56	79.31	68.57
ATP6V0A1	HsaINT0015063	chr17:42507628-42513860	6233	chr17:42507520-42507627=42513861-42513978:+	IR-C	1.69	13.68	1.45	5.49	0.93	10.61	2.8	11.76	0	5.88	4.26	6.54	0.85	9.59	3.36	8.74	20.3	6.02	24.77	9.91	25.13	29.11	45.04	8.57	16.44	11.11	16.28	7.07	15.44	10.34	20	36.36	73.91	77.78	94.44	83.33	93.33	57.14	90	33.33	84.91	23.81	88	76.47
ATP6V0A2	HsaINT0015082	chr12:123751230-123752282	1053	chr12:123751110-123751229=123752283-123752402:+	IR-S	10.34	25	7.04	43.75	14.29	21.31	10.14	49.09	22.03	42.86	30.16	44.68	12.2	44	14.29	38.46	64.44	70.59	58.33	19.44	47.83	14.29	28	8.77	26.67	12.73	21.05	23.64	27.27	100	63.64	5.88	30	12	36.36	24.32	6.67	4.76	0	5.26	33.33	16.13	20	3.45
ATP6V0A2	HsaINT0015083	chr12:123752403-123754419	2017	chr12:123752283-123752402=123754420-123754537:+	IR-S	8.02	29.52	11.83	38.74	12.82	26.62	12.7	30.61	9.76	40.3	14.79	26.4	14.52	39.24	15.33	38.05	36.17	33.87	39.29	15.71	39.18	14.61	33.33	17.74	32.56	15.03	28.57	35.43	30.08	36.63	46.84	31.91	51.02	29.87	13.73	20.69	25	17.95	42.22	28	34.88	19.57	38.71	14.61
ATP6V0A2	HsaINT0015084	chr12:123754538-123756814	2277	chr12:123754420-123754537=123756815-123756986:+	IR-S	16.67	72.22	20.34	66.67	38.32	66.94	26.15	74.36	26.15	75	32.71	90.59	30.53	69.41	36.96	76.74	73.33	52.69	73.17	54.24	67.27	48.62	61.7	32.67	72.41	55.79	45.3	38.89	75.76	79.31	65.71	28.12	70.97	54.55	56.92	52.54	56	42.86	52.63	51.02	62.16	55.22	63.64	35.71
ATP7B	HsaINT0015280	chr13:51944292-51946283	1992	chr13:51946284-51946478=51944109-51944291:-	IR-S	100	100	7.69	0	0	27.27	0	33.33	0	24.32	0	20	6.67	66.67	14.29	6.67	68.42	0	37.5	16.67	14.89	5.88	42.86	0	23.81	23.08	44.44	5.88	35	20	33.33	18.18	38.46	3.7	15.79	0	9.09	3.45	16.67	0	4.35	0	23.81	7.14
ATP9A	HsaINT0015511	chr20:51608627-51610100	1474	chr20:51610101-51610165=51608518-51608626:-	IR-S	0	50	14.29	71.43	4.76	71.43	5.26	100	20	81.82	3.45	60	0	80	33.33	18.28	67.65	24.39	56.92	16.13	58.97	11.52	60.98	7.27	27.78	13.68	56.52	21.15	52.17	21.05	60	2.75	7.22	2.63	11.11	2.26	12.12	1.8	8.33	2.94	11.32	0.87	16.5	2.75
ATP9B	HsaINT0015540	chr18:79359463-79372824	13362	chr18:79359354-79359462=79372825-79372882:+	IR-C	0	50	7.69	53.85	6.67	77.78	38.46	55.56	0	76.92	33.33	77.27	0	81.82	14.29	33.33	64.71	30	70.83	11.11	80.22	5.26	65.96	4.35	65.71	16.13	67.44	12.5	70.73	11.11	89.19	4	50	11.11	10	16.67	20	0	35.48	0	20	0	57.89	5.26
ATPAF1	HsaINT0015556	chr1:46635971-46652580	16610	chr1:46652581-46652628=46632739-46635970:-	IR-C	28.57	100	17.65	42.86	4	71.43	15.38	100	40	77.78	23.81	66.67	37.5	100	33.33	60	91.3	27.27	60	14.29	78.95	33.33	100	25	28.57	9.09	60	26.67	66.67	50	84.62	2.7	36.84	12.2	12.5	9.09	33.33	17.65	14.29	16.67	0	13.04	55.56	8.11
ATR	HsaINT0015601	chr3:142499719-142503361	3643	chr3:142503362-142503453=142499627-142499718:-	IR-S	6.67	2.13	2.86	7.14	5.26	1.45	12	40.74	3.45	12	4.76	17.14	2.7	0	15.38	27.27	28.57	36.84	15.38	0	3.12	5.26	14.29	23.08	4	14.29	5.88	15.79	20	46.67	21.43	0	6.67	0	0	0	16.67	14.29	0	0	0	20	0	0
ATRX	HsaINT0015702	chrX:77633713-77634593	884	chrX:77634594-77634703=77633566-77633712:-	IR-S	15.25	47.47	9.86	26.05	18.52	33.33	18.84	62.12	16.46	32.96	14	28.36	17.54	53.85	29.03	46.94	42.86	30.95	31.71	18.31	27.27	15.25	25.42	15.79	20.93	27.54	31.58	38.46	44	33.33	43.75	0	7.94	1.15	8.33	0	23.81	0	2.22	0	2.86	0	4.35	0
ATXN2	HsaINT0015768	chr12:111453846-111456028	2183	chr12:111456029-111456256=111453677-111453845:-	IR-S	12.9	63.04	15.56	63.08	27.91	70.83	11.48	68.89	26.98	66.67	22.89	65.79	20.99	71.79	19.63	39.74	84.98	48.72	81.14	38.46	76.09	35.04	65.64	29.32	67	27.07	71.43	30.59	67.57	38.57	81.1	18.01	47.06	20.88	28.21	32.04	36.3	16.51	43.08	16.06	44.58	18.84	50.32	16.26
ATXN2	HsaINT0015769	chr12:111452841-111453676	836	chr12:111453677-111453845=111452214-111452840:-	IR-S	9.52	65.29	12.36	59.46	11.81	58.18	10.99	60.31	18.18	58.02	9.09	60	8.94	55.38	14.5	44.83	79.72	39.51	77.53	28.67	57.5	30.5	61.9	25	50.55	22.22	43.1	28.28	54.19	37.42	73.54	14	42.39	12.43	37.8	20	31.03	13.04	38.92	17.57	31.94	14.14	44.5	12.82
ATXN2L	HsaINT0015797	chr16:28836177-28836325	149	chr16:28835933-28836176=28836326-28836490:+	IR-C	89.14	99.76	95.48	99.52	95.76	99.54	93.87	99.84	93.22	99.75	95.71	99.74	92.68	99.79	89.51	94.2	99.21	93.51	99.48	93.72	99.38	95.61	99.52	93.84	99.27	93.12	99.58	95.34	99.82	92.96	98.52	90.19	99.53	92.67	99.26	94.56	98.59	97.86	98.61	94.43	99.39	95.42	99.1	87.74
ATXN2L	HsaINT0015798	chr16:28836491-28836727	237	chr16:28836326-28836490=28836728-28837237:+	IR-C	96.64	89.8	93.47	90.85	92.27	90.41	88.93	82.06	95.59	91.43	93.66	88.32	90.09	90.58	93.77	94.22	89.09	96.38	90.38	90.07	90.35	91.27	89.53	92.52	89.82	96.43	89.58	96.2	88.23	90.22	88.34	86.92	89.79	94.3	92.27	88.14	89.67	87.55	92.05	94.55	91.65	88.25	94.39	91.8
ATXN7L1	HsaINT0015842	chr7:105610604-105613861	3258	chr7:105613862-105614816=105610529-105610603:-	IR-C	47.37	82.86	59.32	72.97	48.05	72.73	47.37	61.7	39.13	54.67	36.36	51.52	54.17	85.71	23.08	52.38	80	54.55	82.61	41.67	74.36	42.86	76.47	53.85	64.71	42.86	42.86	76.47	100	86.67	80	11.11	53.85	20	42.86	25	33.33	22.22	47.37	30.43	29.41	30	63.64	20
ATXN7L2	HsaINT0015854	chr1:109484081-109486056	1976	chr1:109483939-109484080=109486057-109486122:+	IR-S	25	44.83	4.76	71.08	30	59.49	6.67	66.67	18.52	55.93	50	85.19	25	81.82	6.67	45.45	95.96	80	95.2	40	83.06	52.17	85.22	29.73	84.62	52.94	85.03	33.33	87.93	50	87.04	36	70	27.14	66.4	32.47	76.76	29.63	64.44	18.95	77.18	23.08	62.34	28.12
ATXN7L2	HsaINT0015856	chr1:109486123-109486505	383	chr1:109486057-109486122=109486506-109486610:+	IR-S	0	60.87	0	55.06	0	61.76	6.67	77.27	23.08	55.26	3.45	72.5	6.67	52.94	28.57	36.36	85.45	47.83	90.74	20	75.1	37.14	66.42	27.27	62.22	24.14	61.64	30.43	70.97	77.14	90.74	10	34.04	21.43	37.66	15.69	57.06	7.89	41.46	14.63	46.51	8.93	38.41	6.45
ATXN7L2	HsaINT0015861	chr1:109489101-109489929	829	chr1:109488847-109489100=109489930-109490128:+	IR-S	12.5	86.67	33.33	91.11	24.14	94.29	17.65	91.55	33.33	90	20	96.55	33.33	81.18	41.67	46.67	98.15	62.5	98.18	24.14	94.24	41.18	87.56	36	82.54	46.15	94.87	84.62	96.05	73.33	92.86	34.38	63.95	29.2	71.43	22.22	80.53	18.45	71.27	28.7	74.19	28.57	74.71	33.33
AUH	HsaINT0015884	chr9:91217328-91220804	3477	chr9:91220805-91220992=91217277-91217327:-	IR-S	5.45	78.31	20.51	63.64	11.43	67.9	15.29	85.86	7.69	76.09	11.76	75	13.29	82.35	26.44	12.5	67.74	27.27	51.72	5.26	60.71	7.14	68	18.92	25.71	13.51	61.29	30	60	25	56.25	4.62	26.09	6.85	11.54	7.32	24	10	37.93	5.56	10.53	6.9	22.73	10.71
AUP1	HsaINT0015891	chr2:74528936-74529131	196	chr2:74529132-74529282=74528751-74528935:-	IR-S	5.59	88.26	8.01	83.93	4.82	88.46	15.01	91.51	9.88	88.41	10.11	91.63	11.11	88.57	13.74	18.14	77.58	19.27	75.7	19.66	83.02	16.05	87.31	21.21	71.98	15.52	79.33	20	76.57	17.81	65.28	12.88	67.28	13.09	67.58	13.04	64.94	12.27	67.36	15.26	68.96	10.95	71.6	8.33
AUTS2	HsaINT0015926	chr7:70768069-70771548	3480	chr7:70768024-70768068=70771549-70771644:+	IR-S	36.23	78.57	37.93	70.49	27.27	74.55	20.75	68.63	40	77.78	36.36	72.55	38.1	77.78	51.43	55.56	83.33	36.36	78.95	36.36	61.29	23.81	83.33	22.58	52.69	19.44	69.23	44	33.33	35.14	71.43	6.51	20	7.92	8.33	4.05	9.52	6.15	14.75	2.18	10.87	5.39	18.31	6.83
AUTS2	HsaINT0015941	chr7:70766335-70768023	1689	chr7:70766114-70766334=70768024-70768068:+	IR-S	77.5	74.29	70.91	71.2	65.26	81.25	89.29	85.37	85.37	80.65	80.09	89.74	68.18	86.05	66.2	64.71	61.29	72.34	87.76	64.36	88.82	66.14	68.42	72.33	75.62	66.34	80.82	51.68	90.32	83.93	91.04	49.59	43.31	51.18	52	39.54	32.39	36.22	46.03	38.9	34.41	48.91	42.86	44.16
B3GAT1	HsaINT0016146	chr11:134387695-134387826	132	chr11:134387827-134387940=134387548-134387694:-	IR-S	64.42	92.98	38.83	84.66	47.85	100	50.41	87.9	62.18	95.36	76.14	94.2	58.35	88.62	56.96	46.46	73.34	46.65	75.26	38.9	71.4	66.1	75.61	72.4	74.84	46.2	80	46.36	76.58	45.79	60.95	60.35	83.57	74.6	69.77	63.75	67.84	84.07	84.26	72.02	74.54	59.2	64.27	66.99
B3GAT1	HsaINT0016147	chr11:134384189-134387547	3359	chr11:134387548-134387694=134383680-134384188:-	IR-S	18.52	75.93	21.95	82.14	38.71	60.61	22.86	80.65	14.29	70.3	26.32	74.31	31.58	85.11	27.27	22.22	58.14	37.5	78.95	21.84	64.15	21.57	57.78	15.91	45	16.67	58.9	16.05	69.86	16.13	66.47	10.77	29.73	20.25	28.05	6.88	25.68	14.65	32.17	7.69	25.6	8.66	33.33	5.68
B3GNTL1	HsaINT0016171	chr17:82946984-82956694	9711	chr17:82956695-82956769=82946879-82946983:-	IR-C	6.98	37.25	7.69	42.86	6.98	46.15	23.08	42.31	18.18	46.67	0	31.34	8.11	26.32	12	17.65	76.47	50	75.86	22.22	66.1	36.84	75	31.03	31.91	57.89	71.43	29.73	59.18	26.67	44.83	39.13	65.22	71.43	50	25.71	47.37	33.33	41.67	28.57	42.86	60	70.59	2.7
B4GALNT3	HsaINT0016208	chr12:553984-556546	2563	chr12:553194-553983=556547-556866:+	IR-C	4.55	35.35	10.53	25	15.62	23.6	18.92	45.21	8.11	30.86	30	33.33	18.18	44.12	17.07	28.57	29.63	6.12	30.51	20.75	27.27	33.33	8.57	31.25	14.06	12.33	18.33	18.52	18.64	18.64	44.19	100	60	0	0	0	14.29	0	12.5	0	9.09	0	42.86	0
B4GALNT3	HsaINT0016219	chr12:546714-548023	1310	chr12:546646-546713=548024-548102:+	IR-S	4.55	73.08	21.95	80	2.44	77.32	8.33	82.52	17.24	68.29	10	65.31	21.21	83.33	21.74	24.53	76.64	30.23	83.23	17.24	61.85	20	93.55	16	56.6	4.88	75	13.79	57.97	8.82	68.59	33.33	44.44	50	100	25	76.47	100	100	0	63.64	66.67	66.67	33.33
B4GALT3	HsaINT0016254	chr1:161176075-161176433	359	chr1:161176434-161176579=161175808-161176074:-	IR-C	21.64	38.14	15.75	79.31	26.53	86.29	25.66	51.52	25.56	65.43	19.33	77.91	25.25	60.2	20.62	36.96	54.72	44.13	65.33	30.34	53.46	38.98	62.14	22.94	47.14	46.53	39.17	46.23	31.74	38.08	59.09	52.21	70	46.09	58.33	60.53	69.59	47.53	81.32	57.27	84.39	40.19	78.26	61.08
B9D1	HsaINT0016295	chr17:19343462-19343789	328	chr17:19343790-19343857=19343170-19343461:-	IR-S	15.71	71.93	19.57	88.03	24.21	85.14	20.33	72.97	19.44	92	12.73	84.73	31.03	71.43	22.58	26.53	53.85	28.89	74.07	28.36	78.22	29.23	78.95	26.87	53.42	28.12	63.27	32.47	63.93	37.93	58.33	59.26	69.23	43.33	68.89	61.11	56.52	48.28	60.87	50.94	61.54	44.68	67.57	53.85
BAHD1	HsaINT0016402	chr15:40464548-40465334	787	chr15:40464471-40464547=40465335-40465435:+	IR-S	14.76	59.94	29.87	87.76	21.63	76.17	5.9	73.91	13.55	77.4	15.15	81.51	44.19	84.79	21.6	44.4	84.11	28.57	75.62	14.76	73.62	32.77	85.48	32.78	66.72	18.98	58.97	12	64.24	34.55	51.45	15.24	35.94	21.27	18.47	24.28	41.94	20.7	22.13	5.89	45.28	5.41	48.44	6.33
BAIAP2	HsaINT0016504	chr17:81115818-81116229	412	chr17:81115770-81115817=81116230-81117432:+	IR-S	100	67.74	100	80.95	100	84.62	100	77.78	100	60	100	66.67	100	81.82	100	86.11	69.7	94.59	60.98	94.34	73.66	88.24	71.43	97.5	78	97.4	66.42	94.37	74.51	87.8	79.75	88.51	76.47	82.61	89.83	89.74	73.68	91.67	65.62	96	83.33	96.92	76.92	89.9
BAIAP2L2	HsaINT0016536	chr22:38089675-38097031	7357	chr22:38097032-38097178=38089522-38089674:-	IR-S	25	22.14	12.34	42.76	17.16	29.46	16.47	44.31	20	46.67	22.91	42.62	14.29	25.49	44.74	27.27	36.84	25	41.79	50	41.48	23.08	42.86	7.69	51.52	7.69	31.77	0	35	25	30.19	14.29	44.26	71.43	52.73	50	69.01	0	73.32	0	37.04	20	52.11	0
BANP	HsaINT0016611	chr16:88065333-88072068	6736	chr16:88065267-88065332=88072069-88072212:+	IR-C	12	67.86	12.5	59.32	6.67	76.74	12.5	88.24	4.35	82.35	25	85.19	25	80.77	18.52	53.85	71.43	16.67	90.48	25	55.1	14.29	66.67	20	60	33.33	64.29	0	53.85	42.86	70	13.04	55.56	29.41	45	8.33	66.67	3.7	36.84	17.65	46.15	14.29	41.94	7.69
BAZ1B	HsaINT0016781	chr7:73441694-73442180	487	chr7:73442181-73442553=73440398-73441693:-	IR-S	82.46	88.62	81.91	90.74	80.61	88.43	82.38	86.52	69.51	86.54	76.14	85.92	82.61	92.5	84.96	90.72	87.05	86.24	100	86.21	84.47	87.79	84.91	85.9	86.44	90.87	91.15	93.07	91.75	95.29	98.55	83.64	86.05	83.33	84.21	91.53	91.75	89.95	84.76	82.09	94.34	80.1	88.41	83.51
BAZ2B	HsaINT0016843	chr2:159337078-159337566	489	chr2:159337567-159337772=159336942-159337077:-	IR-S	1.75	6.98	4	4.76	1.59	7.41	3.7	6.9	3.03	15.25	0	2.04	6.25	0	2.56	18.18	27.5	16.83	25	8.86	17.29	17.65	25.3	17.73	16.81	14.29	29.27	16.55	30.56	19.69	32.58	12.38	11.63	13.37	20	12.79	16.88	15.05	34.83	14.09	15	24.57	16.67	13.66
BBS1	HsaINT0016874	chr11:66531743-66531950	208	chr11:66531656-66531742=66531951-66533613:+	IR-C	10.34	82.93	11.11	80	7.94	71.43	4	92.41	0	59.49	5.88	72.28	6.12	71.43	33.33	26.53	95.89	21.62	91.71	25.42	85.12	18.92	91.67	17.24	68.63	16.28	80.2	30.43	87.13	23.26	85.96	10.08	75.44	21.15	58.33	28.74	59.35	21.1	67.31	11.3	79.44	8.91	80.42	11.48
BBS1	HsaINT0016882	chr11:66521377-66523455	2079	chr11:66521270-66521376=66523456-66523576:+	IR-C	3.03	94.2	21.05	76.32	23.81	85.54	14.29	85.96	25	82	16	91.89	36.36	79.55	9.68	16.36	64.44	29.03	79.2	38.98	78.63	29.63	70.32	6.67	64.79	8.91	68.49	21.21	56.34	26.88	64	10.64	55.37	19.15	58.62	12.5	55.79	13.33	60.4	15.29	61.82	14.56	60	9.76
BCAT2	HsaINT0017126	chr19:48807075-48810808	3734	chr19:48810809-48810921=48807000-48807074:-	IR-C	7.14	92.31	29.41	92.59	25.93	79.75	45	96.4	18.18	74.47	24.14	84.21	38.89	100	23.53	14.29	50	15.22	44.74	17.81	44.74	11.56	65.91	14.46	37.33	16.2	62.67	14	45.79	12.09	47.17	19.51	34.4	14.67	47.29	14.63	60.34	24.44	46.88	18.4	45	17.79	43.88	12
BCKDHB	HsaINT0017154	chr6:80343813-80345974	2162	chr6:80343664-80343812=80345975-80346270:+	IR-S	64.52	86.67	52.73	83.78	38.46	100	45.45	81.82	45.16	69.23	49.21	58.62	50	75.86	63.08	81.61	95	80.28	84.62	67.16	81.82	73.33	88.89	68.18	86.67	70.21	62.96	83.33	89.47	73.91	100	100	100	100	100	86.67	100	100	100	100	100	100	100	87.5
BCKDK	HsaINT0017172	chr16:31112028-31112120	93	chr16:31111869-31112027=31112121-31112791:+	IR-S	30.14	47.52	25.14	47.22	35.31	38.1	22.62	36.42	28.95	61.24	25.61	51.3	22.43	49.64	24.92	24.58	33.77	31.61	28.08	33.94	40.77	34.78	50.24	28.75	42.61	24.46	38.36	26.37	40	19.25	34.13	28.63	39.9	31.93	33.33	28.94	37.37	31.46	34.25	25.71	30.59	28.33	39.13	27.84
BCL2L2	HsaINT0017215	chr14:23308200-23308815	616	chr14:23307760-23308199=23308816-23311759:+	IR-S	18.84	33.33	14.56	26.47	12.24	34.43	12.77	51.11	12.12	38.46	8.41	40.43	6.78	44.44	12	41.05	45.05	47.06	65.14	25	37.75	27.27	47.54	32.08	35.19	16.56	27.5	27.41	43.43	28.77	46.77	19.1	25.3	18.99	23.08	22.09	36.47	17.98	33.33	24.14	35	22.76	39.78	15.79
BCL9	HsaINT0017266	chr1:147613200-147614426	1227	chr1:147612883-147613199=147614427-147614616:+	IR-S	7.89	64.29	10.59	40.54	10.07	45.65	7.2	49.02	8.47	69.57	8.94	60	9.09	52.38	13.48	3.03	11.63	5.48	18.37	5.17	34.74	8.8	54.29	8.74	31.43	9.38	24.14	8.74	28	8.4	6.45	15.25	64.71	18.97	21.74	22.48	44	18.26	29.17	13.18	24.14	14.75	52.17	12.61
BCS1L	HsaINT0017375	chr2:218659744-218660036	293	chr2:218659656-218659743=218660037-218660245:+	IR-C	52.38	89.25	62.5	83.33	23.08	78.57	42.86	90	71.43	87.88	40	76.47	57.89	92.31	31.03	50	80	44.83	100	84.62	81.13	61.29	71.74	80.95	92.38	86.67	86.84	90	78.38	71.43	85	95.45	96.88	89.47	94.2	95.12	100	94.59	89.33	95.65	94.44	73.91	87.8	100
BDH2	HsaINT0017400	chr4:103085463-103086479	1017	chr4:103086480-103086540=103085349-103085462:-	IR-S	12.09	84.62	8.8	86.36	5.15	83.12	7.46	85.19	6.87	84.95	3.76	84.62	10.58	84.72	16.18	23.26	80.25	33.33	69.12	24.39	84.24	29.31	96.72	29.9	76.47	22.81	77.78	23.4	80.95	32.71	74.77	22.58	70	24.14	82.02	21.74	50	14.29	75	22.86	55.56	21.21	72.22	14.89
BEND5	HsaINT0017508	chr1:48759285-48761336	2052	chr1:48761337-48761470=48758900-48759284:-	IR-C	16.36	0	20	20	20	12	15.38	60	14.29	20	18.92	40	38.46	42.86	27.66	10.34	16.67	13.95	20	12.87	28.3	19.51	15.38	39.13	21.57	20.35	20	19.35	13.64	24.39	20	22.34	21.15	26.11	24.75	20.21	30.51	14.13	17.24	19.78	20.9	15.56	36.17	20.25
BEND7	HsaINT0017523	chr10:13441751-13447265	5515	chr10:13447266-13447316=13441088-13441750:-	IR-C	80.95	92.86	84.62	84.62	71.43	100	75	100	100	92.31	100	100	68	78.95	100	66.67	78.57	42.86	58.62	72.97	75	68.89	75.51	90.91	86.67	70.73	80	72.22	83.67	65.22	57.69	70	77.27	82.61	76.47	57.89	73.33	86.21	80.65	80.95	80	73.33	75	50
BEST4	HsaINT0017562	chr1:44784784-44784904	121	chr1:44784905-44784985=44784629-44784783:-	IR-S	100	42.86	83.33	100	87.5	77.78	84.62	57.14	100	23.08	69.23	42.86	100	100	90.91	100	20	100	100	100	100	100	50	71.43	100	100	100	100	81.82	100	100	100	23.81	100	11.11	100	50	11.11	33.33	33.33	33.33	60	20	33.33
BFAR	HsaINT0017586	chr16:14649974-14655065	5092	chr16:14649804-14649973=14655066-14655210:+	IR-S	29.85	30.33	21.53	34.13	29.66	20.59	24.44	59.09	24.53	24.57	27.44	32.44	28.17	59.18	23.39	17.42	22.73	13.04	28.94	21.13	16.22	19.27	16.67	14.29	16.28	14.62	13.21	11.28	9.43	22.16	16.46	8.5	10.56	12.07	23.4	15.87	10.34	2.97	13.04	18.81	13.73	14.29	18.37	7.46
BICD1	HsaINT0017669	chr12:32367746-32377539	9794	chr12:32367670-32367745=32377540-32378207:+	IR-S	10	90.36	23.53	64	4.35	69.57	33.33	83.33	13.04	47.17	26.83	84	29.41	95.83	56.52	33.33	82.61	30	64.71	20	44	18.18	46.67	40	40	8.33	44	45.45	73.33	40	68.42	8.33	25	4.76	24.68	5.26	12.33	19.15	40	6.42	25.71	1.3	22.22	5.62
BICD1	HsaINT0017670	chr12:32337817-32338785	969	chr12:32337499-32337816=32338786-32338979:+	IR-C	100	84.62	92.59	100	100	90	91.3	100	100	100	100	100	81.4	82.61	100	79.31	83.33	90.91	100	45.45	60	85.71	61.9	63.64	69.23	80	100	100	33.33	84.62	69.23	77.78	80	33.33	60	60	52	69.23	100	71.43	60	66.67	69.23	42.86
BICD2	HsaINT0017678	chr9:92713462-92715252	1791	chr9:92715253-92715463=92711363-92713461:-	IR-S	96.23	83.33	95.74	100	97.73	100	95.74	94.29	97.53	96	92.73	100	90.16	100	100	93.94	94.94	100	100	100	95.2	97.14	95.96	90.8	97.87	97.14	96.83	100	100	98.1	100	100	98.36	98.04	100	100	100	97.92	98.17	93.1	95.42	95.35	95.03	91.92
BIN1	HsaINT0017693	chr2:127053446-127053904	459	chr2:127053905-127054012=127053422-127053445:-	IR-C	45.31	95.77	100	93.39	83.91	91.62	81.68	90.96	83.87	100	78.72	95.99	100	100	61.64	57.26	87.22	65.35	92.6	47.21	90	41.56	77.51	75.65	91.76	64.59	86.73	51.78	92.88	55.36	81.56	10.36	57.9	23.71	53.93	23.29	55.68	21.06	59.41	18.64	60.19	16.37	65.14	12.97
BIN1	HsaINT0017694	chr2:127052363-127053421	1059	chr2:127053422-127053445=127052255-127052362:-	IR-C	100	100	100	100	100	100	100	100	80.72	100	100	100	100	95.97	100	49.73	79.94	67.74	82.37	53.44	87.71	45.6	76.99	60.5	81.82	57.58	87.91	40.43	79.44	51.67	78.64	8.17	33	14.32	49.9	11.41	44.37	11.5	39.07	10.96	49.07	13.56	46.07	8.38
BIN1	HsaINT0017704	chr2:127051244-127059010	7767	chr2:127059011-127059155=127051154-127051243:-	IR-C	32.13	93.88	0	93.18	29.29	85.11	19.46	95.97	7	94.96	9.95	87.94	24.17	88.37	55.41	15.85	76.97	23.71	82.4	30.56	89.69	55.41	98.3	22.29	90.86	21.14	86.2	23.15	80.7	14.91	83.48	100	100	100	99.17	100	100	93.55	100	81.55	97.1	73.66	96.84	83.25
BLOC1S3	HsaINT0017920	chr19:45178832-45179287	456	chr19:45178745-45178831=45179288-45181800:+	IR-S	62.96	71.43	75	66.67	39.13	44.44	47.83	100	39.13	71.43	62.5	60	50	66.67	52.94	37.5	22.22	22.22	33.33	44	36.84	46.67	60	26.83	18.18	45.45	50	44.44	60	30	37.5	51.16	62.96	41.18	64.71	78.95	44.44	56.36	33.33	52.24	73.33	71.43	50	55.93
BMP1	HsaINT0017961	chr8:22197421-22201802	4382	chr8:22197240-22197420=22201803-22201928:+	IR-C	16.67	51.72	27.27	56	4.76	55.56	7.69	62.5	5	66.67	50	79.31	4.35	72.73	26.32	10	36.84	8.2	30.34	9.76	41.64	9.09	38.98	13.89	45.45	12.82	47.06	14.29	31.11	7.04	29.07	7.89	38.46	20.93	40.23	20	54.84	19.23	44.44	8	50.72	9.09	55.26	4.92
BNIP2	HsaINT0018160	chr15:59678088-59679591	1504	chr15:59679592-59679768=59677911-59678087:-	IR-S	0	13.33	0.79	10.34	0.75	19.05	1.2	8.7	5.69	25	1.55	2.13	0.9	20	0	5.38	18.18	8.51	9.09	7.22	15.79	21.65	45.45	4.76	13.73	6.67	13.04	3.77	11.54	4.85	15	36.23	52	38.24	50	37.78	44	40.54	54.84	40	75	33.33	60	31.25
BOLA1	HsaINT0018237	chr1:149899673-149900009	337	chr1:149899602-149899672=149900010-149900795:+	IR-S	25	81.31	20.75	73.13	20	81.48	27.56	81.82	20	73.68	25	78.57	25.81	78.12	20.63	34.25	51.11	41.67	48.72	29.87	70.59	28.57	82.98	38.89	52.38	47.54	70	42.86	78.38	22.86	47.06	31.87	44	33.33	57.58	28.81	65.96	30.43	31.25	29.03	34.88	29.23	60	29.23
BPHL	HsaINT0018282	chr6:3137494-3140385	2892	chr6:3137362-3137493=3140386-3140509:+	IR-C	19.74	93.94	16.48	55.7	13.43	69.64	20.83	79.86	10.64	70	21.74	79.59	21.54	76.74	23.74	28.44	60.56	18.25	63.44	21.83	64.13	17.45	76.34	21.05	43.84	21.46	54.72	30.51	72.73	23.23	55.17	18.1	40.96	17.19	33.33	26.61	45.04	13.73	36.84	28.63	41.04	13.49	48	20.55
BRD1	HsaINT0018481	chr22:49787495-49794033	6539	chr22:49794034-49794294=49787390-49787494:-	IR-S	3.7	31.82	7.53	44.93	10.77	59.32	40.35	51.11	16.67	55.56	9.47	48.15	11.34	59.09	13.64	17.33	33.33	24.07	42.17	15.33	30.99	15.68	32	20	31.97	10.39	30.84	15.23	32.43	27.5	52.94	11.79	23.98	17.14	20.6	14.89	19.51	15.54	29.69	18	19.23	17.05	25.71	10.94
BRD8	HsaINT0018536	chr5:138166728-138167933	1206	chr5:138167934-138168078=138166518-138166727:-	IR-C	8.7	84.44	10.91	77.6	24.19	77.48	12.99	70.69	22.64	80.9	26.19	78.72	27.27	85.92	21.82	20.55	71.43	21.74	67.88	19.13	72.28	34.5	78.82	25.37	61.68	29.73	74.38	27.27	65.78	12.82	60.69	21.13	60.81	23.32	50.34	20.75	26.88	28.89	61.9	22.11	41.35	20.63	50.68	17.95
BRD9	HsaINT0018572	chr5:889767-891154	1388	chr5:891155-891287=889587-889766:-	IR-C	33.33	38.46	40.74	47.17	52.94	51.58	45.45	27.13	54.55	63.64	17.24	53.85	54.55	46.67	38.46	39.39	42.59	29.17	28.12	50	44.16	25.93	36.13	25.93	33.33	33.33	41.51	52.94	35.63	29.03	38.71	33.33	45.16	13.04	22.22	20.93	47.83	22.81	35.06	65.22	35.38	17.95	36.84	26.32
BRD9	HsaINT0018573	chr5:886768-887360	593	chr5:887361-887471=886592-886767:-	IR-C	0	61.9	14.29	76.47	4.35	61.54	55.56	92.94	16.67	62.79	28.57	100	60	88.89	50	46.67	93.94	60	84.31	13.04	54.55	11.11	60	6.67	31.25	13.04	84.62	42.86	84	55.56	91.18	4.35	0	4	4.76	0	8.11	0	9.68	0	6.67	0	3.23	0
BRF1	HsaINT0018626	chr14:105221915-105226068	4154	chr14:105226069-105226161=105221648-105221914:-	IR-C	9.17	67.06	0	60.13	11.64	55.66	8.33	74.28	9.59	64.38	6.67	80.48	9.52	81.09	20.93	33.33	83.21	22.58	70.74	15	65.6	16.83	53.67	6.29	49.5	9.52	59.41	15.61	59.18	15.3	78.9	2.16	24.59	8.92	21.09	7.87	37.85	4	22.53	1.03	23.26	5.88	38.91	7.07
BRPF1	HsaINT0018691	chr3:9745710-9745811	102	chr3:9745573-9745709=9745812-9745930:+	IR-S	16	51.22	10.14	42.47	9.89	49.3	12.9	32.26	13.85	60.61	13.79	50	14.67	38.98	19.23	12.73	27.27	4.35	41.46	18.6	47.37	25	54.29	14.29	34.51	26.44	52.24	12.9	37.66	4.62	25	19.1	25.93	13.4	45.45	20.55	54.72	20	46.84	18.18	54.43	25	42.53	22.08
BRSK2	HsaINT0018743	chr11:1459240-1460969	1730	chr11:1459192-1459239=1460970-1462098:+	IR-C	11.11	53.09	18.99	63.43	9.43	67.66	10.34	72.85	14.29	69.03	20	74.2	1.96	62.82	6.25	27.17	73.42	26.06	70.27	28.02	66.56	17.38	61.13	18.78	67.05	16.67	64.29	13.43	60	19.8	74.5	14.48	47.97	25	62.42	17.37	59.53	13.83	56.81	25.24	58.24	20.3	61.71	17.75
BTN2A1	HsaINT0019108	chr6:26459829-26463243	3415	chr6:26459481-26459828=26463244-26463525:+	IR-S	23.08	85.71	20	92.59	24.32	52.38	8.33	68.42	12.5	76.74	6.67	76.47	11.11	87.5	33.33	10.26	37.35	2.38	35.71	13.85	28.89	3.45	23.33	11.11	38.03	11.48	40.62	18.37	26.76	15.07	27.71	4.71	11.5	6.09	3.03	4.83	18.18	3.55	7.94	2.33	11.34	3.33	12.96	1.54
BUB3	HsaINT0019253	chr10:123162829-123163819	991	chr10:123162612-123162828=123163820-123165370:+	IR-C	14.29	70.79	11.89	59.8	15.82	60.82	16.71	71.88	12.09	68.56	16.71	72.07	12.32	53.37	15.04	19.55	68.1	18.47	57.8	26.98	64.04	26.32	63.44	10.42	61.9	14.54	62.39	22.89	56.52	24.68	53.53	31.03	47.83	18.81	52.94	39.39	31.25	26.32	70.37	19.63	30.34	23.6	50.62	23.53
BZRAP1	HsaINT0019281	chr17:58320582-58322307	1726	chr17:58322308-58322412=58320531-58320581:-	IR-S	0	43.86	33.33	60	14.29	60	0	52.54	0	74.07	9.09	67.65	33.33	54.84	16.67	26.32	49.45	25.71	53.04	12.2	44.13	9.09	45.45	0	29.09	13.04	44.14	5.88	46.81	18.52	59.52	10.89	46.48	11.11	66.46	12.24	44.39	8.77	36.46	8.93	42.11	7.2	43.94	6.33
C10orf88	HsaINT0019668	chr10:122953033-122954014	982	chr10:122954015-122954403=122952829-122953032:-	IR-S	8.7	28.57	4.55	63.96	13.64	36.84	47.89	80	20	66.2	8.57	14.29	21.21	0	23.08	33.02	40.57	17.86	35.48	21.82	38.29	13.79	29.41	4.76	44.44	3.7	29.41	37.19	14.29	23.95	17.65	21.45	38.93	17.07	23.08	14.81	11.11	19.54	46.22	8.41	20	9.09	29.73	10.34
C11orf30	HsaINT0019749	chr11:76544823-76545796	974	chr11:76544259-76544822=76545797-76546297:+	IR-C	29.41	21.05	20	16.13	18.84	20	13.51	22.03	7.69	30.86	11.54	27.66	12.12	15.15	18.37	8.7	16.42	5.45	19.51	21.57	21.52	16.36	20.59	31.58	18.03	14.29	22.22	16.92	20.51	17.65	30.77	26.92	36.84	20	21.43	13.04	7.14	30.43	31.25	27.27	25.93	15.66	31.58	16
C11orf54	HsaINT0019832	chr11:93741729-93747296	5568	chr11:93741627-93741728=93747297-93747448:+	IR-S	5.45	66.67	12	52.38	6.25	62.96	8.33	90	24.39	61.9	11.69	81.4	8.77	80.95	29.73	37.08	55.1	23.08	62.16	11.11	37.66	11.71	56.52	12.96	26.83	11.39	15.79	20.45	30.43	29.58	28.57	8.11	46.67	20	8.57	7.69	0	9.68	13.04	11.76	10.34	6.67	23.08	8.2
C11orf68	HsaINT0019897	chr11:65918219-65918909	691	chr11:65918910-65919060=65916812-65918218:-	IR-C	31.82	70	14.64	30.97	39.33	0	19.55	0	33.33	53.85	29.41	49.3	0	77.78	33.65	0	0	29.41	85.37	40	16.28	28.69	34.65	0	55.56	0	0	35.71	0	29.41	0	6.57	26.72	10.45	36.84	10.45	15.32	0.59	26.12	0.79	28	0	0	16.28
C11orf80	HsaINT0019920	chr11:66744920-66748378	3459	chr11:66744736-66744919=66748379-66748517:+	IR-S	22.22	66.67	14.29	46.15	29.41	38.46	33.33	53.85	37.5	40	23.81	42.86	26.32	23.08	22.22	50	27.27	33.33	42.86	0	15.79	9.09	25	11.11	7.69	9.09	25	23.08	16.67	33.33	0	8.11	9.09	3.7	25	17.24	31.25	8.57	7.69	7.14	14.29	10	14.29	33.33
C11orf80	HsaINT0019931	chr11:66788270-66796280	8011	chr11:66788160-66788269=66796281-66796364:+	IR-S	13.33	72.41	11.11	72.53	20.38	74.77	3.7	85.63	16.67	72.79	10	74.19	12	73.33	20	55.91	78.95	36.69	84.62	41.1	76.47	30.43	81.61	54.02	75.55	14.29	25	46.67	80.49	80.72	100	38.46	50	37.5	50	41.46	26.67	52.94	67.82	28	52.94	32.82	71.72	38.46
C11orf80	HsaINT0019934	chr11:66801103-66803997	2895	chr11:66801031-66801102=66803998-66804190:+	IR-S	66.97	63.95	0	52.15	45.45	27.78	0	63.91	46.07	49.47	8.57	51.35	39.33	32.84	67.27	57.75	62.5	4.35	55.56	7.69	35.71	16.67	36.84	42.17	12	6.67	25	0	4	53.85	38.46	70	60.29	0	32.76	29.69	8.11	46.07	29.93	49.3	34.65	45.45	14.29	47.5
C11orf95	HsaINT0020002	chr11:63765255-63765806	552	chr11:63765807-63766304=63764868-63765254:-	IR-S	50	67.44	42.86	48.57	23.08	50.68	20	44.44	0	65.52	33.33	44.44	0	46.15	50	0	37.5	27.27	35.14	17.24	53.02	9.68	57.14	20	75	23.08	63.08	0	72.22	0	84.62	13.92	60.53	21.74	54.84	15.79	36.21	23.48	44.07	27.87	64.38	30	65.52	17.07
C12orf73	HsaINT0020342	chr12:103956749-103957068	320	chr12:103957069-103957215=103956631-103956748:-	IR-S	16.98	10.34	19.44	20.59	22.11	22.86	14.29	8.64	30.43	33.33	14.05	11.39	20.83	10.14	21.9	26.5	15.44	25.47	21.88	26.09	33.89	33.66	38.18	35.11	29.59	21.63	35.09	20.55	25	14.89	16.36	37.72	63.86	41.52	55.88	42.22	38.84	43.18	54.55	51.14	52.85	52.8	47.47	51.76
C14orf159	HsaINT0020606	chr14:91215557-91224683	9127	chr14:91215405-91215556=91224684-91225359:+	IR-S	17.24	66.67	12.73	46	10	40.68	25.71	65.71	13.25	40.26	12	67.74	15.62	82.09	10.2	20	68	31.58	62.5	24.44	50.72	20	83.33	11.86	40	12.68	48.94	11.11	44	25.37	62.96	10	22.03	4	5.26	8.7	6.67	17.65	22.39	8.82	13.79	1.33	18.92	12.9
C14orf79	HsaINT0020823	chr14:104989089-104991490	2402	chr14:104988943-104989088=104991491-104991620:+	IR-S	36.84	85.19	48.39	100	73.33	89.47	33.33	73.33	27.27	100	31.03	65.22	42.86	100	69.23	63.64	80	65.22	73.33	37.25	74.6	33.33	100	40.19	57.58	23.81	80	41.18	88.24	45.45	35.48	33.33	66.67	31.82	72.41	40.74	49.09	26.92	78.95	41.18	76	13.85	53.33	31.03
C14orf79	HsaINT0020825	chr14:104993065-104994597	1533	chr14:104992948-104993064=104994598-104995518:+	IR-S	14.29	50	33.33	47.37	38.46	76.47	27.27	78.95	33.33	42.86	42.86	77.78	45.45	56.52	40	50	71.43	15.38	60	33.33	75	73.33	52.94	33.33	43.59	20	41.67	18.18	47.83	73.33	87.5	12	54.29	17.95	31.43	34.69	35.48	23.53	41.94	29.03	31.91	15.38	38.46	42.86
C14orf80	HsaINT0020833	chr14:105492735-105497356	4622	chr14:105492579-105492734=105497357-105497443:+	IR-C	23.08	94.81	42.86	97.7	14.29	94.44	20	92.98	15.38	96.08	20	100	11.11	97.73	50	39.13	90	9.09	100	23.81	93.48	26.09	92.75	31.43	96.3	55.56	83.51	50	91.43	38.46	82.09	77.78	100	66.67	100	29.41	90.91	38.46	89.19	63.64	93.22	16.67	88.89	33.33
C15orf39	HsaINT0020921	chr15:75208825-75210748	1924	chr15:75205999-75208824=75210749-75212169:+	IR-C	19.3	52.94	24.32	30.61	25.76	33.33	34.78	46.15	29.73	42.86	30.19	40	24.77	7.69	21.05	21.57	30.43	27.27	4.76	25.81	40.54	28.12	33.33	35.14	30.77	39.13	39.13	21.95	20	20	15.38	21.74	33.33	60	50	44.44	23.08	60	0	77.78	16.67	23.08	40	33.33
C16orf13	HsaINT0021025	chr16:634798-635280	483	chr16:635281-635340=634719-634797:-	IR-C	23.53	96.4	62.96	99.21	42.86	99.12	29.41	95.12	33.33	100	28.21	99.28	30	96.78	38.46	71.43	91.3	65.22	97.33	41.46	98.4	38.1	94.92	76.47	89.13	46.34	95.78	65.22	96.24	48.84	97.18	33.33	69.12	26.83	82.26	33.33	85.71	20.43	82.48	29.41	79.26	36.47	83.03	34.78
C16orf58	HsaINT0021081	chr16:31493525-31493602	78	chr16:31493603-31493787=31493467-31493524:-	IR-S	7.09	73.81	22.58	72.13	11.11	85.11	17.31	81.02	24.44	78.72	12.2	82.52	9.4	81.25	13.38	35.09	72.51	29.58	76.42	34.19	82.42	33.8	80.39	53.09	87.38	30.18	76.34	29.93	75.1	26.53	76.65	27.4	73.53	39.36	77.25	31.71	57.75	33.64	77.23	52.05	88.05	37	78.82	28.89
C16orf58	HsaINT0021082	chr16:31493049-31493466	418	chr16:31493467-31493524=31492978-31493048:-	IR-S	15.15	80.47	14.29	81.21	17.53	89.15	11.76	77.59	45	87.88	20	88.37	18.64	76.98	14.58	42.25	84.34	36.2	85.63	46.15	88.84	43.17	87.1	64.29	94.96	49.43	88.24	36.47	91.35	36.72	76.35	43.53	84.4	50.24	81.01	43.75	78.65	57.31	86.59	63.43	86.92	49.78	83.15	42.45
C16orf59	HsaINT0021084	chr16:2460382-2460622	241	chr16:2460283-2460381=2460623-2460693:+	IR-S	16.28	63.11	13.95	63.37	9.09	60.15	4.96	51.72	11.11	42.86	3.39	46.96	10.2	64.42	13.67	20	66.53	23.26	71.43	23.2	55.37	24.24	63.72	10	49.42	6	44.04	20.48	57.38	15	57.38	46.67	88	61.9	65.85	44	68	23.53	60.66	30.61	54.29	29.03	61.54	40
C16orf59	HsaINT0021091	chr16:2464230-2464521	292	chr16:2464039-2464229=2464522-2464963:+	IR-S	21.29	75.56	25.83	77.25	20.9	75.52	34.38	81.11	28.93	82.54	25.62	81.69	22.69	78	33.33	69.86	90.43	57.89	92.24	51.63	88.34	50.46	86.7	68.67	87.28	32.79	88	52.27	88.84	46	84.74	68	88.8	62.79	89.29	74.55	90.7	57.89	89.92	80.39	78.03	62.86	85.44	59.32
C16orf70	HsaINT0021149	chr16:67140595-67144293	3699	chr16:67140511-67140594=67144294-67144376:+	IR-S	4.76	59.18	10.34	61.11	13.33	73.77	6.38	70.37	15.79	64	0	56.25	13.04	62.16	15	23.08	65.85	5.26	73.33	20	70.21	8.33	91.67	8.33	56.25	21.43	68.42	20	70.37	50	57.14	18.75	50	15.79	33.33	20	66.67	29.41	44.44	6.67	35	21.74	61.29	9.09
C16orf72	HsaINT0021174	chr16:9103260-9116667	13408	chr16:9102984-9103259=9116668-9119698:+	IR-S	15.38	7.14	17.81	39.39	12.4	24.53	10.31	24.44	17.2	30.43	13.88	20	20.96	25.93	13.27	31.43	19.15	29.66	35.14	28.44	17.65	21.47	21.43	21.29	20	32.16	12.5	21.39	14.75	19.32	30.16	18.07	24.64	24.06	20.99	22.61	13.4	19.81	21.74	18.34	8.89	23.08	17.95	19.27
C16orf86	HsaINT0021209	chr16:67667073-67667295	223	chr16:67666814-67667072=67667296-67667525:+	IR-S	16.13	33.33	33.33	47.06	33.33	38.1	16.67	34.62	7.69	39.13	7.69	42.11	6.67	44.44	6.25	6.58	24.44	16.98	33.33	16.33	30.1	13.04	47.01	31.43	40.98	16	37.5	12.36	25.81	4.17	22.03	100	58.82	86.67	68.75	71.43	57.14	40	66.67	42.86	56.25	71.43	64.29	33.33
C16orf86	HsaINT0021210	chr16:67667526-67667877	352	chr16:67667296-67667525=67667878-67668098:+	IR-S	13.04	88.57	6.67	90.91	14.29	100	20	91.67	7.69	76.92	20	88.24	8.33	79.49	17.65	18.31	62.07	40.54	69.01	22.22	72.66	41.46	78.38	41.46	67.65	30.67	68.32	28.21	64.56	12.12	47.95	42.86	85.71	100	100	66.67	57.14	100	52.94	40	57.14	60	80	100
C16orf86	HsaINT0021211	chr16:67668099-67668199	101	chr16:67667878-67668098=67668200-67668758:+	IR-S	42.86	63.64	50	70	71.43	73.91	33.33	58.97	45.45	80.95	42.86	81.82	46.15	79.49	64.71	23.46	29.63	12.82	35	35.21	57.52	55.56	49.3	66.67	65.22	62.5	62.96	28.81	39.82	14.29	27.87	55.56	56.52	84.62	77.78	77.78	69.23	100	71.43	60	47.83	100	50	20
C17orf62	HsaINT0021377	chr17:82449293-82449430	138	chr17:82449431-82449480=82449170-82449292:-	IR-C	14.89	95.45	22.89	81.2	23.53	66.67	15.49	81.82	23.53	76.27	14.29	81.7	20.63	62.5	14.29	61.36	68.25	60.49	65.85	50.94	81.12	51.9	76.82	69.77	78.22	58.82	79.34	55	77.92	27.08	53.7	77.78	82.61	90	88.89	68.25	88.79	79.05	93.16	66.4	83.94	81.82	89.47	61.11
C17orf62	HsaINT0021378	chr17:82447622-82449169	1548	chr17:82449170-82449292=82447580-82447621:-	IR-C	14.29	61.9	16.83	71.43	11.43	73.2	13.04	69.23	23.68	73.83	28.36	76.74	21.88	51.85	20.93	46.99	66.32	49.02	76.58	53.57	78.99	41.84	74.03	45.76	70.07	44.83	71.43	45.61	71.43	42.03	47.5	36.05	74.1	55.04	70.29	43.94	74.77	45.35	72.86	49.67	79.41	49.23	72.86	34.88
C17orf62	HsaINT0021379	chr17:82446697-82447579	883	chr17:82447580-82447621=82446623-82446696:-	IR-C	17.33	64.71	18.99	67.69	23.48	80	18.1	80.18	28.21	72.09	10.68	77.95	12.82	72	25.53	58.73	68.25	48.15	72.13	44.36	78.1	55.56	88.74	61.47	87.96	42.65	75.86	50	81.92	49.4	64.71	45.36	69.23	57.8	79.72	49.59	72.34	55	76.61	43.82	81.73	50.62	70.63	51.65
C17orf62	HsaINT0021380	chr17:82445961-82446622	662	chr17:82446623-82446696=82445864-82445960:-	IR-C	8.66	62.16	6.15	58.94	7.37	48.78	16.36	75.64	7.04	66.2	8.94	54.84	15.89	48.39	2.86	21.13	53.95	27.71	61.14	21.59	59.43	28.45	67.94	34.55	55.17	24.24	59.17	23.16	60	16.81	45.04	25.69	48.84	33.06	54.05	25.21	43.59	30.57	54.4	28.11	54.84	28.63	58.27	17.24
C17orf80	HsaINT0021490	chr17:73243004-73245167	2164	chr17:73242896-73243003=73245168-73245344:+	IR-C	42.86	100	73.33	81.82	100	83.33	100	100	77.78	86.67	80	50	28.57	71.43	100	71.43	55.56	86.67	100	85.71	88.24	100	100	100	100	60	100	84.62	100	63.64	80	100	50	100	100	100	100	77.78	100	100	100	60	100	100
C19orf12	HsaINT0021656	chr19:29702978-29708253	5276	chr19:29708254-29708423=29698886-29702977:-	IR-S	38.46	100	100	100	54.55	78.95	39.13	89.47	20	86.67	0	81.82	7.69	100	46.67	100	38.46	100	71.43	33.33	75	50	60	86.67	77.78	30.77	74.19	80	33.33	57.14	27.27	23.26	60.98	50.88	53.33	30.12	31.82	35.21	55	24.59	44.83	41.82	62.96	20.93
C19orf44	HsaINT0021751	chr19:16509989-16513013	3025	chr19:16509499-16509988=16513014-16513109:+	IR-C	11.11	46.67	11.11	20	11.11	42.86	0	50	0	15.79	20	14.29	0	16.67	20	45.45	33.33	27.27	48.15	23.08	38.46	27.27	66.67	7.69	29.03	25	23.81	22.22	47.83	29.41	20	16.67	37.5	11.11	12.5	27.27	22.22	22.22	37.5	23.08	21.74	6.67	28.57	29.41
C19orf44	HsaINT0021752	chr19:16513110-16514496	1387	chr19:16513014-16513109=16514497-16514663:+	IR-C	7.69	55.56	25	33.33	29.41	84.62	5.88	66.67	14.29	0	20	50	16.67	100	0	60	47.37	60	53.85	23.08	71.43	60	47.37	28.57	40	37.5	47.83	33.33	75	23.08	66.67	23.81	46.67	25	45.45	21.43	42.86	10	40	23.08	50	18.52	52.94	13.64
C19orf44	HsaINT0021754	chr19:16517342-16520093	2752	chr19:16517230-16517341=16520094-16521352:+	IR-C	53.85	62.5	28.57	61.9	13.04	57.58	42.86	62.5	16.67	77.27	33.33	90	18.18	66.67	42.86	37.93	84.62	21.21	70.15	31.71	80.49	40	63.16	33.33	73.91	38.46	56.67	36	56.36	22.22	60	29.41	43.4	37.93	29.67	12.5	51.85	12.82	58.82	4.35	60	23.81	68.42	23.81
C19orf54	HsaINT0021805	chr19:40743976-40744066	91	chr19:40744067-40744196=40743905-40743975:-	IR-S	0	39.16	40.33	42.05	33.65	41.51	0	46.25	27.06	38.08	29.77	46.69	8.86	29.87	38.95	13.1	25.24	36.12	24.27	17.77	33.85	27.52	42.75	20.44	43.25	8.95	35.27	19.58	33.19	17.01	11.62	33.44	41.71	2.7	26.26	21.86	10	30.94	0	0	11.76	29.69	48.57	20.23
C19orf57	HsaINT0021822	chr19:13890463-13892785	2323	chr19:13892786-13892890=13889188-13890462:-	IR-S	33.33	45.45	12.5	57.14	0	33.33	60	17.24	0	10.2	17.65	29.73	9.09	16.67	13.04	37.5	25	77.78	23.81	50	41.46	0	28.57	4.76	21.74	33.33	18.18	60	75	100	75	12.5	47.37	14.29	33.33	0	33.33	0	37.5	0	39.13	14.29	35.29	16.67
C19orf60	HsaINT0021843	chr19:18589078-18589412	335	chr19:18588995-18589077=18589413-18589683:+	IR-C	16.8	95.06	27.48	95.92	24.31	90.47	10.68	93.7	18.75	98.74	29.02	95.76	18.54	97.55	23.64	30.25	80.33	25.09	81.96	20.43	89.65	28.77	95	25.75	86.99	56.45	92.94	57.6	90.36	36.36	88.31	37.18	84.81	42.71	80.65	31.04	81.73	32.26	84.22	34.77	83.83	34.97	83.15	31.96
C1QTNF6	HsaINT0021952	chr22:37180868-37182151	1284	chr22:37182152-37182735=37180166-37180867:-	IR-S	100	65	65	64.44	76	76.47	100	66.67	100	73.33	75	89.47	100	65.38	100	63.16	79.22	59.09	75.61	72.92	78.43	89.74	68	82.5	66.15	83.13	83.02	89.36	76.15	85	80.22	100	90.48	95.92	64	90.91	92	91.67	88.89	94.29	100	100	83.33	86.67
C1RL	HsaINT0021974	chr12:7102088-7108250	6163	chr12:7108251-7108479=7101898-7102087:-	IR-S	19.05	18.64	11.11	26.47	8.7	54.29	20	31.71	20	52	11.11	37.78	13.51	24	18.64	6.9	17.39	20	21.52	13.04	23.08	29.17	21.43	36.36	27.66	27.27	30.23	17.24	11.43	5.88	11.63	55.56	45.45	18.18	29.41	21.21	33.33	11.11	100	33.33	9.09	23.81	21.74	24.14
C1RL	HsaINT0021975	chr12:7100027-7101897	1871	chr12:7101898-7102087=7099901-7100026:-	IR-C	33.33	91.67	13.21	47.06	19.35	64.71	20	69.57	29.03	57.45	9.52	61.9	14.29	44	12	16.13	52.94	21.05	45.95	12.73	41.67	18.64	63.64	35.48	68	29.41	14.29	23.53	33.33	23.33	35.71	0	33.33	15.38	100	25	18.18	27.27	50	45.45	33.33	20	81.82	33.33
C1RL	HsaINT0021976	chr12:7099761-7099900	140	chr12:7099901-7100026=7099686-7099760:-	IR-S	0	38.46	2.56	39.13	4.55	42.86	25	52.94	8.11	44.44	14.29	33.33	9.09	35.71	26.67	14.29	15.79	28.21	52.94	18.37	37.25	9.09	29.41	37.5	22.22	21.43	36	21.43	23.08	10.71	28.21	50	71.43	45.45	9.09	27.27	45.45	40	100	37.5	16.67	33.33	14.29	25
C1RL	HsaINT0021977	chr12:7097164-7099685	2522	chr12:7099686-7099760=7094550-7097163:-	IR-S	39.62	71.88	23.6	74.19	37.93	67.82	46.43	64.44	20.75	69.7	19.44	67.35	38.98	70.21	25.81	58.14	66.67	40	47.37	60	70.15	73.68	80.49	40	57.38	38.46	56.1	44.62	77.78	42.03	66.67	50	66.67	42.86	70	50	64.29	77.78	100	53.33	58.62	35.14	38.46	38.1
C1orf123	HsaINT0022102	chr1:53220345-53220569	225	chr1:53220570-53220617=53220261-53220344:-	IR-S	7.58	35	7.14	31.58	9.2	38.03	7.78	42.11	7.59	23.08	9.21	29.11	7.38	57.58	10.4	17.39	26.32	16.78	42.22	16.36	37.76	14.29	54.22	20	34.4	20.28	32.77	10.64	29.9	17.72	29.69	26.15	41.94	26.73	40.91	29.79	38.74	31.91	44.33	29.08	50	30.65	32.11	21.88
C1orf123	HsaINT0022104	chr1:53218496-53218866	371	chr1:53218867-53218923=53218414-53218495:-	IR-S	3.07	59.18	2.48	48.62	7.61	48.84	2.7	75.38	4.96	53.06	8.98	56.16	11.11	63.41	7.69	21.11	51.72	18.46	58.24	23.58	58.65	21.38	68.18	20.5	44.12	17.58	50.38	18.23	50.91	16.13	43.1	15.92	47.69	34.12	51.28	20.41	52	15.49	52.38	31.76	47.01	13.75	38.89	21.02
C1orf131	HsaINT0022183	chr1:231225524-231226738	1215	chr1:231226739-231226825=231225471-231225523:-	IR-C	11.11	22.22	11.11	57.14	12.5	39.13	18.18	66.67	3.23	61.54	10	41.18	12.2	42.86	6.25	47.62	63.16	26.53	75	15.25	67.35	6.98	55.56	21.57	36	11.11	61.9	20	75	47.37	57.14	2.33	46.67	13.04	40	9.68	37.5	4.35	25	13.04	33.33	14.89	15.79	18.75
C1orf159	HsaINT0022240	chr1:1082988-1084352	1365	chr1:1084353-1084383=1081818-1082987:-	IR-S	13.5	82.67	22.87	84.73	20.36	83.43	49.95	93.22	30.94	92.86	47.96	91.43	26.61	77.16	36.44	57.32	92.7	34.67	89.64	41.91	85.22	33.01	89.46	29.16	81.75	37.83	84.34	38.92	85.53	66.82	88.22	10.93	52.7	24.54	61.21	22.08	48.8	17.34	58.68	24.89	65.86	33.65	51.1	21.29
C1orf174	HsaINT0022295	chr1:3891058-3892882	1825	chr1:3892883-3892996=3890569-3891057:-	IR-C	3.57	60	12.12	67.9	15.79	68.66	4.62	60	9.29	73.33	16.47	69.49	7.56	56.76	6.77	13.82	60.78	44.33	78.57	32.76	84.21	15.92	69.37	9.29	47.83	22.03	80.57	10.69	50.91	13.87	51.26	6.33	42.86	34.69	55.81	23.08	63.64	14.29	42.86	14	47.62	21.05	73.53	11.39
C1orf35	HsaINT0022462	chr1:228102561-228102642	82	chr1:228102643-228102688=228102478-228102560:-	IR-S	12.5	44.33	12.2	52.2	14.29	52.66	13.79	60	10.53	54.55	3.85	64.71	6.45	52.75	10	9.09	36.61	5.88	34.09	15.6	43.31	13.89	45.93	12	41.08	11.11	45.31	12.2	44.03	7.46	34.15	19.12	43.56	15.6	49.4	18.75	44.32	19.3	36.84	18.68	54.58	17.36	53.96	15.79
C1orf35	HsaINT0022463	chr1:228102383-228102477	95	chr1:228102478-228102560=228102310-228102382:-	IR-S	2.89	36.67	4.48	37.01	4.29	38.46	2.11	37.36	5.26	41.46	3.45	40.61	3.67	40.64	3.94	5.56	48.12	11.11	38.18	11.54	46.65	18.11	56.26	15.61	50.92	18.52	50.46	12.28	46.89	8.72	38.52	32.26	59.8	33.33	50.87	26.32	48.4	28.77	56.5	24.51	59.02	32.41	61.38	22.5
C1orf35	HsaINT0022464	chr1:228102166-228102309	144	chr1:228102310-228102382=228102080-228102165:-	IR-S	7.56	76.77	7.04	63.03	3.57	64.66	8	67.83	11.49	61.67	8.11	67.09	5.8	67.77	11.11	16.67	68.42	23.27	70.53	21.6	73.28	24.06	76.7	20.69	62.56	20	71.07	15.11	67.21	23.88	59.45	35.52	67.48	30.43	73.57	32.18	67.23	40.27	74.14	26.47	64.85	20.81	67.2	29.03
C1orf35	HsaINT0022465	chr1:228101474-228102079	606	chr1:228102080-228102165=228101339-228101473:-	IR-S	1.2	58.02	4.55	48.91	4	53.57	2.33	74.03	3.33	53.15	1.82	55.56	2.61	52.05	6.9	18.92	75.4	16.88	78.67	12.94	56.94	13.4	51.24	9.3	44.72	6.8	39.9	13.85	57.33	23.33	83.08	8.57	37.97	3.57	25.93	17.14	34.44	12.94	29.11	8.2	27.59	10.34	30.95	2.63
C1orf50	HsaINT0022493	chr1:42767625-42773562	5938	chr1:42767509-42767624=42773563-42773649:+	IR-S	10	55.56	30.43	33.33	4.55	29.41	0	38.46	9.52	0	3.7	33.33	16.67	33.33	9.52	19.05	11.11	24.14	36.36	8.7	28.57	20	9.09	23.08	16.67	16.13	60	18.92	38.46	25	37.5	16.13	31.43	22.39	25.71	15.07	19.15	13.89	33.33	17.78	20	17.24	20	10
C1orf52	HsaINT0022503	chr1:85252703-85258523	5821	chr1:85258524-85258722=85249954-85252702:-	IR-C	11.39	82.18	15.15	77.67	14.02	70.93	20.2	80.84	15.51	79.84	29.03	83.4	16.35	78.89	26.7	45.95	75.73	38.86	68.29	20.93	74.1	15.65	75.12	15.92	48.86	22.92	61.8	21.03	70.49	41.32	68.16	5.94	38.85	8.85	35.26	13.64	35.33	12.33	34.75	10	34.13	6.74	45.45	10.16
C1orf56	HsaINT0022517	chr1:151048853-151050437	1585	chr1:151047783-151048852=151050438-151051395:+	IR-C	69.23	33.33	20	25	14.29	66.67	15.38	42.86	33.33	25	55.56	100	20	55.56	46.67	37.93	100	43.75	53.85	16.13	42.86	21.74	20	17.65	40	33.33	60	35.29	42.86	35.48	28.57	21.43	28	16.28	16.67	50	20	33.33	15.79	18.18	44	30	23.81	29.41
C20orf194	HsaINT0022900	chr20:3343732-3348524	4793	chr20:3348525-3348623=3343676-3343731:-	IR-S	20	33.33	0	38.46	5.88	25	5.26	50	6.67	16.67	20	47.37	0	33.33	16.67	81.82	50	17.65	50	55.56	80	4.35	71.43	11.11	25	7.69	37.5	16.67	62.5	20	50	1.75	8.11	3.23	8.57	1.41	8.11	7.5	26.32	9.52	13.04	1.18	4.35	1.27
C20orf194	HsaINT0022901	chr20:3340640-3343675	3036	chr20:3343676-3343731=3340504-3340639:-	IR-C	0	50	7.69	15.79	6.67	44.44	25	71.43	9.09	33.33	0	42.86	0	69.23	0	11.11	75	20	85.71	10	83.33	23.81	33.33	4	60	30	53.85	28.57	41.67	27.27	53.85	2.48	12.5	0.97	20	5.04	27.27	6.19	16.28	0	11.76	2.33	27.27	2.04
C20orf24	HsaINT0022927	chr20:36607819-36612009	4191	chr20:36607715-36607818=36612010-36612557:+	IR-C	27.27	90.82	29.41	73.96	22.16	59.55	56.97	100	15.79	88.1	41.52	82.44	33.11	94.04	26.9	52.63	84.62	27.27	100	42.4	92.22	47.06	55	52.32	89.25	71.08	100	40.79	100	71.05	100	60.95	26.39	38.69	87.28	57.4	77.43	53.96	74.74	42.51	49.65	36.47	57.27	41.4
C20orf27	HsaINT0022956	chr20:3758679-3760006	1328	chr20:3760007-3760186=3758536-3758678:-	IR-S	16.67	83.33	8.57	92.59	16.67	84.62	21.21	74.19	16.67	83.33	14.29	90.91	10	91.3	14.29	16.67	67.35	14.71	36.73	11.63	71.93	50	90	41.18	76.92	46.67	64.29	24.53	67.16	12	33.98	36.84	100	45.45	41.18	42.86	52.24	71.43	92	83.33	72.73	33.33	85.19	50
C20orf96	HsaINT0023032	chr20:290308-290590	283	chr20:290591-290749=290259-290307:-	IR-C	85.71	93.88	72.41	95.96	86.36	97.42	87.23	93.1	69.7	94.74	85	94.59	85.71	95.92	76.47	80	100	93.94	91.45	83.33	95.04	94.52	98.79	79.66	92.66	95.24	96.67	100	100	94.87	91.38	95.45	97.5	100	100	100	100	94.17	96.67	100	100	100	100	96.72
C20orf96	HsaINT0023040	chr20:276880-277043	164	chr20:277044-277145=276793-276879:-	IR-S	1.69	38.94	9.09	32.48	3.55	33.01	7.69	29.44	5.26	26.94	7.55	39.29	6.45	36.36	8.47	25	73.22	28.3	71.82	8.74	55.19	20	51.5	17.53	47.29	12.73	52.42	18.52	73.57	20.88	74.62	6.54	42.55	12.15	45.53	20.37	38.24	25.71	46	9.68	34.93	18.75	42.34	10.81
C20orf96	HsaINT0023041	chr20:276087-276792	706	chr20:276793-276879=275968-276086:-	IR-S	13.04	97.67	23.81	92.05	20.34	94.06	30.67	94.5	32.31	96.41	24.64	95.14	34	93.9	35.29	44	90.23	53.19	93.87	29.03	95.83	42.25	95.59	33.98	94.4	43.48	91.35	41.18	91.49	61.9	89.19	26.32	78.12	35.82	83.24	38.85	88.86	42.25	86.06	34.25	86.17	44.12	89.8	26.15
C21orf2	HsaINT0023064	chr21:44335805-44337648	1844	chr21:44337649-44337667=44335758-44335804:-	IR-S	0	33.87	0	68.24	14.63	45.4	5.41	56.11	10.26	60.89	33.96	58.13	3.31	36.65	0	37.22	60.25	42.31	55.52	6.42	44.17	16.36	66.33	4.47	41.03	16.67	41.56	16.24	41.35	26.54	61.46	12.95	18.19	10.71	34.21	19.08	26.4	8.92	30.19	28.33	36.87	14.55	30.16	5.68
C21orf2	HsaINT0023065	chr21:44333263-44335757	2495	chr21:44335758-44335804=44333033-44333262:-	IR-C	4.76	94.22	14.43	94.55	8.3	97.97	14.29	98.05	26.63	98.32	12.5	97.88	57	91.25	45.75	57.52	97.94	56.72	96.14	46.59	96.28	50.56	92.76	38.45	88.15	34.23	95.61	43.98	95.97	58.44	97.59	17.89	81.08	60.17	84.27	32.39	83.31	32.32	79.91	44.95	84.29	35.34	80.34	34.25
C21orf2	HsaINT0023067	chr21:44330920-44331842	923	chr21:44331843-44332014=44330823-44330919:-	IR-S	9.09	85.23	17.24	84.01	2.13	79.1	2.56	91.61	3.23	85.56	39.33	84.52	7.32	84.25	12.82	32.84	70.75	36.07	68.94	6.42	51.14	19.04	64.1	21	54.44	16.73	61.22	22.22	64.1	25.77	69.18	4.52	34.93	23.66	54.03	4.9	49	7.09	45.86	25.94	48.08	17.3	47.76	18.85
C21orf2	HsaINT0023068	chr21:44330327-44330822	496	chr21:44330823-44330919=44328944-44330326:-	IR-S	17.39	70.35	17.24	64.51	17.33	60.77	6.67	72.95	8	72.27	16	67.8	25	65.83	6.12	10	47.69	12.36	53.13	8.7	39.14	12.98	38.19	6.67	35.47	18.03	39.74	12.33	37.67	19.4	52.26	6.78	25.33	19.19	31.61	11.86	25.75	11.76	22.22	8.07	27.43	11.39	33.14	3.37
C21orf33	HsaINT0023085	chr21:44137297-44143204	5908	chr21:44137177-44137296=44143205-44143361:+	IR-C	43.86	93.98	53.49	94.12	24.59	87.92	46.34	97.29	40	98.58	48	94.48	58.97	92.65	60.87	41.94	82.02	30.56	83.53	28.77	84.92	34.48	89.69	29.23	65.29	48.28	77.78	36.36	83.93	42.03	67.9	18.12	40.38	19.63	44.44	22.48	31.96	22.96	40	14.89	47.95	16.67	51.58	13.04
C21orf58	HsaINT0023119	chr21:46314881-46315473	593	chr21:46315474-46315547=46314716-46314880:-	IR-S	22.22	26.9	22.58	32.93	19.48	32.3	26.83	27.95	47.62	33.06	51.72	31.5	25	28.3	26.15	50	51.34	59.55	66.56	39.56	51.62	43.59	48.01	41.82	39.52	32.67	51.3	28.81	55.45	48.72	63.82	50	6.67	60	33.33	21.43	14.29	6.67	26.32	30	54.55	14.29	33.33	4.76
C21orf58	HsaINT0023120	chr21:46311568-46314715	3148	chr21:46314716-46314880=46311456-46311567:-	IR-C	8	28.12	14.29	29.31	20	25.21	23.4	37.88	17.39	28.43	17.39	29.89	11.48	18.69	21.43	7.09	33.15	26.32	36.87	18.6	25.39	19.54	29.9	10.53	20.53	14.29	24.23	12.68	25.59	20	28.53	9.09	40	14.29	18.75	0	30	26.32	14.29	27.27	24.32	17.65	18.42	14.29
C21orf58	HsaINT0023122	chr21:46302155-46302484	330	chr21:46302485-46302576=46301133-46302154:-	IR-S	13.79	27.61	22.22	33.51	29.58	32.63	30.61	31.94	26.67	30.53	20	33.33	23.64	27	31.15	18.64	31.94	30.23	37.97	29.6	35.12	26.73	42.76	31.31	40.14	37.25	42.76	29.17	33.33	15.94	29.07	33.33	30.43	37.5	63.64	11.11	50	33.33	35.71	37.5	42.86	86.67	58.21	16.67
C21orf59	HsaINT0023128	chr21:32602368-32603160	793	chr21:32603161-32603292=32602272-32602367:-	IR-S	4.05	53.79	4.72	52.48	5.1	57.66	4.45	64.75	5.82	64.34	5.57	61.9	4.49	64.56	7.37	13.93	58.12	19.05	57	9.49	48.66	13.12	60.78	11.18	48.6	14.38	56.86	16.13	50	15.52	55.08	11.71	38.39	12	40.51	15.58	36.73	15.09	61.6	19.31	33.33	16.1	60	13.94
C21orf59	HsaINT0023129	chr21:32601974-32602271	298	chr21:32602272-32602367=32601674-32601973:-	IR-S	2.6	62.02	4.23	50.18	2.59	61.87	6.09	63.19	4.76	59.13	5.52	54.26	4.94	67.67	6.8	18.12	60.34	21.4	57.14	14.37	72.41	16.36	75.69	16.81	52.87	14.17	59.78	15.68	55.66	22.01	56.44	18.25	65.08	18.26	47.89	24.77	59	26.42	58.62	20.89	52.73	20.83	60.24	20.78
C2orf42	HsaINT0023440	chr2:70160788-70165091	4304	chr2:70165092-70165192=70160625-70160787:-	IR-S	50	77.78	5.26	66.67	11.11	88.57	57.14	75	6.67	100	14.29	84.62	40	83.33	33.33	33.33	83.33	42.86	80	60	75	75	86.67	42.86	71.43	33.33	73.33	42.86	87.5	100	100	33.33	38.46	27.27	100	27.27	100	33.33	100	0	63.64	66.67	70	66.67
C2orf68	HsaINT0023566	chr2:85611787-85611877	91	chr2:85611878-85612056=85611668-85611786:-	IR-C	7.46	6.81	2.82	10.84	8.22	16.49	4.21	6.21	7.55	6.43	3.92	7.07	4.13	8.18	7.51	14.59	21.21	20	29.03	18.85	22.25	26.26	36.42	30.21	29.27	7.23	16.2	11.76	12.2	13.29	19.25	67.03	62.6	61.33	65.14	55.34	56.89	54.24	57.14	57.64	60	48.51	53.68	31.74
C2orf68	HsaINT0023567	chr2:85609587-85611667	2081	chr2:85611668-85611786=85609435-85609586:-	IR-C	10.14	81.54	11.73	63.64	16.81	66.99	27.92	86.36	8.74	75.96	25	73.91	12.5	74.87	26.87	33.73	65.38	39.36	64.71	34.22	67.27	29.82	73.05	36.75	50	31.82	62.34	19	61.22	37.28	49.28	63.64	80.72	66.37	70.37	63.36	72.55	57.33	75.26	62.83	64.86	46.07	75.9	52.69
C2orf68	HsaINT0023568	chr2:85609068-85609434	367	chr2:85609435-85609586=85605253-85609067:-	IR-C	10.92	14.29	9.42	18.98	10.32	25.34	6.75	17.03	11.18	22.63	11.74	23.88	10.61	20.85	10.48	23.08	29.12	31.65	32.79	25.6	31.12	27.97	35.21	34.47	40.41	21.29	35.61	20.55	33.14	33.07	35.14	44.86	60.82	65.64	59.06	42.6	50.82	65.22	62.26	60.54	55.07	55.9	57.89	47.13
C2orf81	HsaINT0023613	chr2:74416242-74417381	1140	chr2:74417382-74417717=74416011-74416241:-	IR-S	99.35	100	99.88	100	99.72	98.11	99.36	99.17	100	100	99.84	99.2	99.87	100	99.86	98.49	93.1	98.43	98.38	96.93	97.78	96.66	93.55	96.95	98.53	98.8	97.78	98.74	97.21	98.15	99.36	94.69	86.44	93.59	96.88	94.59	98	91.43	100	97.95	94.39	100	100	97.42
C2orf81	HsaINT0023614	chr2:74415928-74416010	83	chr2:74416011-74416241=74415709-74415927:-	IR-S	100	59.3	82.84	73.88	83.87	100	100	100	100	65.17	44.15	100	48.53	100	55.79	85.07	63.79	85.52	37.26	74.11	70.95	84.6	91.33	85.04	100	88.56	100	92.27	57.54	90.93	100	87.08	100	95.56	92.17	88.26	100	87.74	78.92	100	100	100	100	100
C3orf17	HsaINT0023766	chr3:113008431-113010642	2212	chr3:113010643-113010704=113008171-113008430:-	IR-S	3.03	31.82	4.17	22.67	5.75	57.89	12.94	33.33	5.71	17.65	5.26	39.53	7.69	39.53	15.56	20.55	46.67	16.36	48.57	17.02	46.34	10.77	35.29	16.42	33.33	16.33	24.44	13.68	40.74	16.13	46.94	5.56	18.75	2.56	42.86	13.51	29.41	7.14	16.67	14.29	22.22	9.09	24.14	3.7
C3orf18	HsaINT0023773	chr3:50565862-50566005	144	chr3:50566006-50566094=50565466-50565861:-	IR-C	60	100	42.86	66.67	45.45	88.24	47.37	77.78	71.43	100	20	60	55.56	60	20	14.29	37.5	63.64	84.62	7.69	68	73.33	46.67	80	60	44.44	50	38.46	44	4.76	12	47.06	73.91	50	75	44.83	58.62	60	71.43	50	80	57.58	100	31.03
C4orf33	HsaINT0024113	chr4:129106648-129109306	2659	chr4:129106587-129106647=129109307-129109358:+	IR-S	0	100	0	20	0	33.33	0	33.33	0	0	33.33	33.33	0	33.33	33.33	13.04	100	23.08	16.67	0	50	25	100	38.46	33.33	9.09	60	3.7	50	0	33.33	18.52	53.85	42.86	50	25	27.27	11.11	55.56	33.33	14.29	21.74	25	15.79
C4orf33	HsaINT0024114	chr4:129109359-129109472	114	chr4:129109307-129109358=129109473-129109672:+	IR-S	0	25	0	0	0	100	0	75	11.11	55.56	0	100	9.09	100	17.65	50	60	40	50	0	33.33	100	80	33.33	100	14.29	16.67	73.33	33.33	21.74	33.33	4	33.33	23.81	55.56	14.29	36.36	11.11	60	17.65	50	8.57	41.18	30.43
C4orf33	HsaINT0024115	chr4:129109673-129111685	2013	chr4:129109473-129109672=129111686-129112688:+	IR-C	20	25	0	14.29	14.29	60	11.11	50	25	77.78	11.11	100	14.29	100	20	44.44	62.5	16.67	11.11	23.08	22.22	14.29	7.69	28.57	11.11	6.67	16.67	37.5	75	20	36.84	3.7	13.64	20	44	23.08	15.38	15.38	41.18	18.18	21.21	14.29	8.11	16.13
C7orf26	HsaINT0024886	chr7:6602141-6607959	5819	chr7:6602101-6602140=6607960-6608724:+	IR-S	29.56	93.88	21.94	82.89	19.85	85.24	15.55	86.11	26.75	82.29	26.51	84.96	25.74	95.33	36.18	40.05	79.89	38.44	82.72	41.45	78.77	28.88	75.08	35.55	68.34	26.77	78.84	46.74	71.93	38.28	67.45	25.78	55.39	36.21	59.05	34.13	56.88	32.17	47.08	38.4	60.84	26.18	62.58	27.46
C7orf43	HsaINT0024942	chr7:100157939-100158088	150	chr7:100158089-100158679=100157843-100157938:-	IR-S	11.11	66.1	25.58	69.23	13.04	65.14	25	74.63	18.18	75.93	25.71	72.63	37.93	74.19	16.28	22.22	47.9	26.67	58.73	22.22	64.54	23.29	70.98	41.82	73.51	20.69	59.49	14.29	72.06	29.03	54.29	21.98	60.17	31.03	68.54	19.33	54.22	23.6	67.8	29.85	64	14.46	73.68	18.52
C7orf43	HsaINT0024950	chr7:100155826-100156385	560	chr7:100156386-100156549=100155671-100155825:-	IR-S	13.04	78.31	8.7	78.54	10.14	73.95	17.14	79.83	6.9	73.22	8.33	75.36	10.34	87.96	26.92	33.33	93.75	66.67	89.89	23.33	78.06	37.5	80.42	18.03	79.25	25	76.76	37.14	87.85	60.98	90.3	17.87	47.83	10.84	56.4	12	49.49	14.29	53.68	10.84	50.19	10.06	52.94	13.7
C8orf33	HsaINT0025125	chr8:145052498-145052585	88	chr8:145052438-145052497=145052586-145052897:+	IR-S	29.66	68.75	50	72.41	24.84	44.44	28	44.68	27.72	65.52	50	66.67	28.75	80	24.85	32.5	29.55	30.99	34.83	38.08	43.65	44.9	46	42.86	53.85	82.35	71.43	45.88	47.83	32.77	30	63.57	75.93	76.72	61.62	65.42	58.49	64.14	66.34	72.15	75.22	75.11	70.73	75.71
C8orf44	HsaINT0025166	chr8:66676903-66677641	739	chr8:66676745-66676902=66677642-66677954:+	IR-S	24.32	85.45	29.41	75	31.03	90.7	28.21	91.67	66.67	84.21	33.33	77.78	55.56	88.89	59.18	25	36.36	56.76	71.43	42.11	75.76	36.84	84.62	33.33	100	50	66.67	20	71.43	19.48	33.33	63.64	100	69.23	53.85	70	77.78	80	73.33	71.43	25	42.86	100	63.64
C8orf44	HsaINT0025167	chr8:66677955-66679720	1766	chr8:66677642-66677954=66679721-66681000:+	IR-S	100	100	80	100	100	100	90.48	100	86.67	100	75	100	100	100	100	87.1	100	100	100	87.1	95	50	100	80	90.48	60	100	89.47	100	100	76.47	66.67	90.91	28.57	76.74	57.89	77.78	60	100	100	100	75	88.89	81.82
C9orf114	HsaINT0025313	chr9:128826153-128826383	231	chr9:128826384-128826433=128826022-128826152:-	IR-S	0.75	50.75	3.19	48.6	2.65	60.84	4.07	55.56	1.27	50.33	2.74	67.14	4	51.16	6.21	22.73	70.73	10.42	67.07	14.81	51.97	16.46	59.09	12.82	44.05	10.53	57.04	7.94	65.41	17.17	67.01	17.14	40	22.39	56.14	13.33	46.88	23.08	35.8	13.13	48.21	15.29	43.28	13.73
C9orf142	HsaINT0025359	chr9:136992563-136992639	77	chr9:136992418-136992562=136992640-136992700:+	IR-S	21.69	25.49	18.58	23	15.15	18.69	13.83	28.66	15.72	21.14	16.05	23.98	20.57	26.4	21.9	15.97	29.66	15.97	26.32	10.48	18.95	25.17	41.99	9.96	16.88	18.23	30.03	15.45	26.71	14.18	20.68	48.39	45.83	47.76	45.32	25.84	30.25	43.1	51.58	33.52	31.6	46.62	43.46	43.93
C9orf142	HsaINT0025360	chr9:136992701-136992924	224	chr9:136992640-136992700=136992925-136992974:+	IR-S	37.1	83.74	36.17	82.94	27.45	79.84	37.86	82.78	31.88	94.44	41.33	81.01	28.57	89.39	38.65	43.48	79.88	40.32	82.53	33.84	76.74	50.23	90.98	38.16	83.75	44.88	85.01	52.94	82.57	30.23	72.6	63.95	92.24	76.4	95.35	71.43	89.9	71.64	95.16	73.4	90.55	72.41	91.25	68.37
C9orf142	HsaINT0025361	chr9:136992975-136993052	78	chr9:136992925-136992974=136993053-136993243:+	IR-S	23.61	94.57	25.71	84.68	31.67	93.13	29.52	89.68	38.74	95.41	23.23	80.26	32.11	86.08	32.17	39.3	74.05	42.48	84.15	40.3	82.67	45.27	90.78	40.91	83.94	38.8	88.15	42.86	88.07	29.37	71.87	42.71	82.32	60.28	84.34	55.7	86.67	56.44	89.37	46.75	90.43	42.51	86.25	47.74
C9orf3	HsaINT0025418	chr9:95082720-95086681	3962	chr9:95082575-95082719=95086682-95087218:+	IR-C	15.79	83.33	27.27	74.55	14.29	70	17.65	81.25	16.67	72.73	11.11	73.33	40	60	57.14	84.62	94.74	37.5	93.1	28.57	79.31	42.86	83.33	36.84	79.17	46.67	69.23	82.61	64.1	63.64	100	66.67	49.33	20	70.73	36.84	60	52.38	55.56	44.83	90	40	85.71	35.14
C9orf72	HsaINT0025527	chr9:27558608-27560226	1619	chr9:27560227-27560299=27558491-27558607:-	IR-S	40	81.82	9.68	65.22	33.33	76.67	22.22	87.88	11.76	66.67	17.65	81.82	20	70	9.52	52.5	83.33	55.88	57.58	42.11	78.22	45.45	76	25.49	48.15	44.83	57.14	42.5	62.5	62.96	88.68	30.43	37.5	14.29	0	33.33	50	23.81	52.94	4.35	50	23.81	38.46	14.29
CABIN1	HsaINT0025838	chr22:24098193-24113565	15377	chr22:24098014-24098192=24113566-24113748:+	IR-S	3.3	55.22	4	46.67	2.65	38.27	5.48	81.48	4	46.24	5.26	53.85	4.85	64.71	11.76	3.7	35.85	1.27	39.78	6.98	39.39	18.28	63.38	9.47	42.42	6.31	39.24	3.03	39.02	4.4	30	52.38	90.16	43.33	72.84	45.76	65.12	60	84.09	30	72.34	42.86	80	36.51
CABLES2	HsaINT0025871	chr20:62394266-62394936	671	chr20:62394937-62395014=62394157-62394265:-	IR-S	18.18	89.47	0	76.47	12	68	3.45	71.43	15.15	74.19	0	87.5	10	81.82	17.65	29.73	76.32	21.57	71.43	15.94	69.91	14.29	70.97	20	68.97	10.34	60	23.81	80.39	16.67	50	6.06	68.75	14.89	39.62	14.29	47.37	14.29	58.82	9.26	57.14	9.09	36	9.33
CACNA1A	HsaINT0025970	chr19:13227528-13230081	2554	chr19:13230082-13230209=13227431-13227527:-	IR-C	50	100	100	100	100	90.48	100	100	71.43	86.67	50	100	66.67	100	100	70	91.3	100	100	86.67	97.26	70.37	100	57.14	69.23	100	100	80	100	100	96.08	50	53.85	53.19	76	48.15	40.98	68.18	65.96	33.33	50.52	50	72.31	52.38
CACNA1A	HsaINT0025971	chr19:13224773-13227430	2658	chr19:13227431-13227527=13224667-13224772:-	IR-C	100	70.21	54.1	87.93	43.55	92.31	100	100	30	66.47	53.33	85.42	90	80.45	100	75	86.31	90	84.98	76.27	89.88	76.27	96.53	100	77.42	72	87.27	72	74.17	87.27	88.05	52.43	69.5	54.1	76.38	69.23	76.95	56.25	67.44	58.1	72.34	60.67	78.3	60
CACNA1A	HsaINT0025979	chr19:13209499-13210616	1118	chr19:13210617-13210652=13209312-13209498:-	IR-S	100	71.37	20	71.37	0	71.54	100	100	45.31	69.7	100	66.63	100	64.38	53.8	29.29	45.64	7.65	65.17	0	51.21	0	24.31	23.08	43.94	23.36	59.17	12.13	43.01	45.31	52.86	1.85	19.35	3.45	13.9	1.75	12.56	1.93	16.72	0	11.23	0	10.97	0
CACNA1A	HsaINT0025981	chr19:13208054-13208755	702	chr19:13208756-13209009=13206442-13208053:-	IR-C	3.7	47.54	57.14	68.54	0	55	0	66.27	21.21	72.31	0	78.18	36.84	40.74	0	35.48	70.99	0	46.48	21.13	55.49	27.27	66.47	25	52.73	0	62.5	44.44	74.67	36.36	70.37	11.11	48.12	19.57	54.62	21.6	53.43	22.22	62.28	24.53	59.63	30.43	50.38	20.59
CACNA1H	HsaINT0026293	chr16:1212139-1212510	372	chr16:1211946-1212138=1212511-1212528:+	IR-C	0	60.63	30.23	61.78	14.29	64.71	0	72.78	9.09	63.58	28.57	80.07	6.25	65.08	14.29	20	68.91	5.71	63.92	12.5	64.63	6.09	64.52	6.49	56.04	2.04	58.49	15.79	51.53	22.22	73.98	11.68	53.92	10.41	41.41	11.96	57.55	15.18	51.14	13.85	51.16	13.04	56.18	12.58
CACNA1H	HsaINT0026302	chr16:1218652-1218969	318	chr16:1218210-1218651=1218970-1219130:+	IR-S	17.94	75.79	8.89	75.93	8.41	81.43	5.04	71.6	8.82	78.91	23.26	79.75	21.79	85.44	12	12.94	83.4	8.47	82.15	8.45	76.54	8.74	64.56	16.02	62.41	12.23	76.26	11	80.52	24.22	87.29	0.6	33.27	3.92	33.1	2.06	43.38	0	30.96	0.48	36.89	2.8	47.83	0
CACNB1	HsaINT0026545	chr17:39191594-39194883	3290	chr17:39194884-39194970=39191474-39191593:-	IR-C	27.27	29.03	0	26.67	14.29	37.5	33.33	33.33	20	16.67	5.26	35.71	20	50	20	27.27	34.78	23.53	47.17	9.68	29.79	11.11	21.95	22.22	28	7.69	36.36	4.76	41.67	14.29	41.82	3.98	16.06	5.84	19.79	4.82	18.9	2.88	17	4.22	21.3	5.37	18.61	1.94
CACNB3	HsaINT0026583	chr12:48824969-48825162	194	chr12:48824949-48824968=48825163-48825243:+	IR-S	7.69	39.66	0	63.98	0	100	8.5	80.98	0	80.87	8.5	64.22	10.26	100	26.06	4.44	81.28	22.87	71.25	42.62	72.32	18.6	75.18	24.41	71.34	12.4	68.56	10.26	78.15	26.8	74.75	2.74	25.53	11.36	25.48	4.06	28.37	3.68	29.7	7.28	26.8	5.98	28.54	1.78
CALCOCO1	HsaINT0026837	chr12:53713901-53714132	232	chr12:53714133-53714241=53713701-53713900:-	IR-C	11.11	60.68	10.53	67.88	1.75	65.36	16.13	68.6	8.33	60.76	7.41	67.3	10.77	68.57	21.95	19.23	78.67	8.82	71.43	12.68	67.05	14.1	80.56	18.75	66.33	15.79	77.2	18.75	72.09	6.82	61.74	13.45	50.11	19.19	49.63	17.96	57.68	26.56	60.83	10.17	59.6	13.8	60.5	15.36
CALD1	HsaINT0026902	chr7:134934078-134935687	1610	chr7:134932988-134934077=134935688-134935765:+	IR-C	100	91.9	100	94.81	85.29	94.17	90.04	85.92	86.24	89.58	92.37	100	85.69	95.55	92.91	64.65	100	100	100	76.67	100	100	100	82.32	100	100	93.83	100	100	51.61	90.75	100	100	100	100	100	100	100	100	100	100	100	100	100
CAMK1	HsaINT0026974	chr3:9757622-9757728	107	chr3:9757729-9757846=9757347-9757621:-	IR-C	19.05	45.16	13.04	58.97	16.13	65.71	18.52	48.15	29.73	61.9	17.65	64.71	14.29	47.06	18.92	15.79	45.1	25.93	34.38	21.21	47.75	36.84	49.4	21.62	42.65	12.94	40.62	20.63	50	6.8	23.08	14.69	36.08	31.88	40.62	19.51	34.38	19.64	40.09	19.57	36.42	19.13	51.11	15.09
CAMK2D	HsaINT0027049	chr4:113454516-113455725	1210	chr4:113455726-113455821=113451032-113454515:-	IR-C	50	100	42.86	50	80	100	64.71	60	100	100	20	100	53.85	100	50	36.36	87.5	71.43	60	100	85.71	100	100	70	85.71	69.23	23.08	20	33.33	78.95	72.41	33.33	52.94	0	66.67	28.57	60	53.85	29.41	60	60	9.09	69.23	33.33
CAMK2G	HsaINT0027078	chr10:73824085-73825278	1194	chr10:73825279-73825347=73824040-73824084:-	IR-C	5.88	78.18	18.18	72.8	17.24	69.81	22.58	86.52	30.43	68.18	24.53	86.92	16.13	84.62	37.5	27.27	100	42.86	85.71	25.93	90.48	17.24	77.78	40.74	73.33	28.57	92.98	36.36	83.1	15.38	76.47	9.09	56.36	28	39.13	28	58.14	42.86	56.86	9.68	37.93	18.92	57.89	5.56
CAMK2G	HsaINT0027081	chr10:73817555-73819531	1977	chr10:73819532-73819645=73817479-73817554:-	IR-C	28.21	76.59	65.53	68.75	33.63	74.86	25.37	74.69	36.15	73.28	41.38	68.87	35.55	71.55	41.88	27.66	76.83	58.69	81.47	47.91	77.52	32.05	61.83	48.06	84.77	24.89	71.07	27.56	75.83	22.23	63.59	19.25	56.36	33.9	58.12	11.54	42.62	42.33	62.28	15.19	52.6	21.36	62.39	13.66
CAMKK2	HsaINT0027131	chr12:121248735-121249786	1052	chr12:121249787-121249874=121248606-121248734:-	IR-C	4.11	28.12	2.75	34.21	11.54	53.85	9.52	55.56	11.76	41.67	13.92	60.78	12	33.33	7.04	23.53	43.48	29.11	54.39	21.95	45	28.36	63.64	18	52.94	13.04	57.14	14.29	50.82	31.58	59.18	4.14	19.57	5.53	13.33	6.22	8.26	9.09	24.39	3.03	9.84	3.5	22.31	7.95
CAMKV	HsaINT0027146	chr3:49861578-49861790	213	chr3:49861791-49861865=49861439-49861577:-	IR-S	21.43	86.67	23.71	90.97	18.7	83.59	31.11	90.34	27.47	82.46	22.5	83.4	32.43	91.58	36.71	25	85.65	25	86.63	30.93	89.77	34.85	88.76	25.49	87.12	29.51	86.73	22.63	87.19	22.42	83.33	29.75	78.73	21.95	75.66	29.11	73.65	33.58	78.78	26.79	80.41	31.88	79.83	25.31
CAMKV	HsaINT0027148	chr3:49861019-49861179	161	chr3:49861180-49861300=49860943-49861018:-	IR-S	2.13	83.71	3.03	80.42	5.66	73.49	10.53	70.1	5.45	73.51	11.28	77.9	20.41	69.37	13.13	17.11	77.63	19.72	77.87	16.79	79.9	19.68	83.9	18.68	79.53	20.4	83.38	19.75	85	15.66	72.1	17.79	72.47	20.35	77.3	14.58	72.16	21.32	72.83	20	75.88	19.36	75.13	17.47
CAMTA2	HsaINT0027233	chr17:4982161-4982756	596	chr17:4982757-4982892=4982089-4982160:-	IR-C	0	36.84	25	38.46	50	25	16.67	40	0	30	13.04	42.31	20	41.18	8.11	11.11	49.09	11.11	41.82	7.69	57.63	22.58	52.63	5.26	48.94	9.09	45.28	11.11	60.87	33.33	61.54	18.75	35.21	11.11	44.93	9.68	39.24	11.63	31.58	7.25	32.08	14.29	33.33	6.85
CANT1	HsaINT0027268	chr17:78997645-78997839	195	chr17:78997840-78997963=78996992-78997644:-	IR-S	57.14	33.33	43.12	50	38.81	51.52	41.75	73.33	35.85	35.71	35.48	81.82	53.12	47.83	50	59.76	46.15	53.74	44.68	41.97	41.71	48.72	39.13	48.61	41.4	41.55	38	45.26	31.53	59.24	47.44	49	44.09	42.86	51.22	54.39	52	53.14	48.98	42.7	48.51	44.97	39.33	51.56
CAPN10	HsaINT0027339	chr2:240596522-240596680	159	chr2:240596319-240596521=240596681-240596942:+	IR-C	5	47.76	6.06	53.74	6.45	43.84	2.63	43.4	15.15	55.56	1.89	48.33	7.22	55.17	11.43	6.12	49.48	15.79	56.43	15.15	46.14	15.89	62.12	16.67	58.67	7.69	43.2	13.04	45.56	12.12	47.88	8.33	57.1	13.33	55.74	11.48	59.85	19.15	54.03	15.15	57.89	15.52	58.62	10.68
CAPN10	HsaINT0027343	chr2:240591012-240591932	921	chr2:240590815-240591011=240591933-240592150:+	IR-S	6.9	54.28	1.33	58.1	12.75	69.57	8.57	69.22	2.94	51.06	13.21	72.43	4.76	51.12	25.48	18.33	63.25	14.29	58.39	15.08	47.31	9.09	52.64	4.17	30.6	6.82	46.42	3.61	51.38	43.83	54.08	0	37.32	0.97	27.81	4.76	42.57	3.52	28.77	1.47	23.78	2.91	40.61	3.39
CAPN10	HsaINT0027347	chr2:240595305-240597887	2583	chr2:240595024-240595304=240597888-240598087:+	IR-C	73.33	98.52	80	100	75	100	100	99.33	33.33	100	50	99.48	60	100	64.77	81.82	99.21	100	99.23	80	98.53	100	100	77.78	99.13	100	99.26	69.23	97.94	63.64	100	75	100	93.55	98.85	76.49	98.86	100	97.63	76	97.3	75	100	52.94
CAPN7	HsaINT0027520	chr3:15242254-15245525	3272	chr3:15242178-15242253=15245526-15245671:+	IR-S	5.88	60	7.14	29.41	21.43	69.23	35.71	50	20	25	4.35	0	11.11	25	24.14	71.43	80	35	62.5	26.67	33.33	11.11	33.33	0	28.57	22.58	42.86	17.07	42.86	37.93	61.54	10	5.88	0	4	11.76	18.18	4.48	7.69	1.96	10	4.76	25	0
CAPN7	HsaINT0027521	chr3:15245672-15246731	1060	chr3:15245526-15245671=15246732-15246794:+	IR-S	0	42.86	3.23	6.67	0	29.03	17.95	39.13	2.86	35.71	11.76	40	4.35	14.29	4.76	60.98	91.3	40.43	100	44.83	44.83	6.25	38.46	2.7	27.27	11.11	80.95	54.55	60	37.93	78.57	2.44	0	4	10.34	2.7	4.76	6.12	4.76	0	9.09	2.22	0	4
CAPRIN1	HsaINT0027578	chr11:34051872-34052420	549	chr11:34051683-34051871=34052421-34052636:+	IR-C	32.65	42.86	49.17	47.06	41.58	53.66	50.86	47.83	40.35	37.5	44.38	52.94	41.4	29.41	31.74	19.25	20	27.97	35.94	24.73	27.57	24.05	18.81	20.54	25	54.95	37.35	39.5	42.22	31.66	31.75	11.83	13.04	12.31	15.38	15.91	10.76	15.78	15.69	15.6	15.84	19.45	18.78	16.08
CAPRIN2	HsaINT0027602	chr12:30710471-30711565	1095	chr12:30711566-30711629=30709552-30710470:-	IR-S	15.29	15.75	14.29	13.53	21.62	13.45	13.04	16.23	9.84	18.44	8.45	12.53	16.21	17.15	13.66	17.81	21.51	26.76	18.46	24.71	16.55	18.37	16.11	28.81	19.05	19.33	20.78	12.15	18.88	19.59	25.36	6.09	15.92	10.96	19.31	12.64	11.84	7.8	11.64	5.98	18.61	13.6	16.15	9.09
CARKD	HsaINT0027776	chr13:110634596-110634671	76	chr13:110634545-110634595=110634672-110634776:+	IR-S	18.92	50	22.89	50	18.18	58.82	17.89	53.72	25.45	60	23.2	51.06	18.87	45.45	23.64	35.56	51.11	40	52.54	24.8	55.45	35.21	46.94	29.52	40.74	23.36	54.1	28.95	42.86	21.43	46.34	38.8	43.31	25.42	38.61	29.03	45.95	32.52	43.94	25.42	46.76	26.26	38.71	25.45
CARKD	HsaINT0027777	chr13:110634777-110635467	691	chr13:110634672-110634776=110635468-110635588:+	IR-S	21.15	70.77	28.7	80.26	22	78.48	19.1	93.19	18.75	81	32.67	87.72	22.77	70.69	29.9	62.62	79.14	58.82	83.33	45.34	76.18	29.31	77.53	25	75.8	23.49	66.86	34.4	76.04	37.61	84.47	13.9	58.47	24.1	61.58	26.63	58.24	25.82	63.31	26.09	41.82	25.25	53.85	19.35
CARKD	HsaINT0027779	chr13:110637250-110638241	992	chr13:110637129-110637249=110638242-110639995:+	IR-S	81.82	98.4	68.42	97.78	57.89	98.28	100	96.92	80	96.88	93.1	95.96	75	95.12	86.21	87.5	94.44	100	93.65	77.78	96.58	82.86	82.22	85.71	96.83	46.15	87.3	100	91.18	93.33	93.65	58.62	79.31	65.52	89.19	45.45	78.95	55.1	96.3	68	90.62	60	96.72	45.95
CARS2	HsaINT0027829	chr13:110646091-110647100	1010	chr13:110647101-110647239=110645967-110646090:-	IR-S	5.75	71.57	16.22	74.63	9.91	54.55	3.23	65.22	9.09	68.79	7.69	63.64	5.77	60.51	14.89	28.57	61.11	21.31	63.64	35.63	66.07	27.27	69.81	26.09	62.25	23.81	70.4	26.42	76.17	19.19	70.18	21.47	55.25	38.46	47.67	22.01	48.42	18.05	58	20.83	61.39	19	59.15	15.79
CASD1	HsaINT0027920	chr7:94551479-94552349	871	chr7:94551338-94551478=94552350-94552427:+	IR-S	8.57	18.75	0	39.13	7.46	55.17	6.38	54.17	0	46.03	15.79	45	8.33	35.71	20	16.19	41.18	30	31.25	15.69	37.19	12.2	54.72	11.69	36.36	15.79	26.76	16.52	34.88	26	62.86	21.43	40.51	16.83	31.25	17.76	37.31	19.27	39.33	23.68	32.5	14.71	52.78	16.52
CASD1	HsaINT0027929	chr7:94535524-94537471	1948	chr7:94535309-94535523=94537472-94537894:+	IR-S	8.57	42.86	3.23	33.33	7.69	40	5.88	35.48	16.13	58.14	2.13	25	16.28	44.44	11.63	29.23	58.82	30.56	42.86	20.48	51.16	16.67	50	19.44	45.1	20.43	40.85	23.4	52.63	31.58	40.74	11.28	13.25	8.62	18.52	4.76	20	6.76	22.77	3.8	11.54	4.76	22.45	1.61
CASKIN1	HsaINT0027966	chr16:2181930-2183645	1716	chr16:2183646-2183747=2181791-2181929:-	IR-S	25	41.67	33.33	75	25	42.22	33.33	78.72	16.67	50	5.88	62.96	15.79	72.22	20	24.14	60.98	12.5	47.95	20	52.47	13.04	55.1	14.29	43.9	0	55.32	18.18	60.71	16.13	56.41	3.03	46.62	4.41	35.22	6.67	44.33	6.12	53.43	3.36	36.59	5.6	47.21	4.29
CASKIN1	HsaINT0027974	chr16:2187462-2189026	1565	chr16:2189027-2189157=2187353-2187461:-	IR-S	4.76	50	6.67	30.16	5.88	48.84	33.33	63.27	17.65	44.19	5.88	60.87	18.18	50	14.29	4.76	46.15	20	67.65	18.18	63.64	26.67	58.78	17.65	47.57	3.45	55.56	11.11	58.14	17.07	50	8.8	50.78	20.17	49.66	11.68	49.2	12.7	54.22	8.82	51.79	11.73	49.74	14.42
CASKIN1	HsaINT0027976	chr16:2187073-2187165	93	chr16:2187166-2187274=2186978-2187072:-	IR-S	50	40.74	20	36.67	22.22	39.13	46.67	57.38	33.33	40.74	22.22	44.44	28.57	48.57	33.33	14.29	42.11	17.07	38.27	12.5	45.57	13.73	39.85	17.65	38.46	33.33	38.3	18.52	42.59	20.83	30.69	44.35	58.72	28.09	59.43	35.08	59.47	44.78	61.83	30.11	56.73	39.29	63.34	36.68
CASP2	HsaINT0028035	chr7:143288530-143291539	3010	chr7:143288309-143288529=143291540-143291690:+	IR-C	20	44.83	23.53	41.67	21.1	47.22	25.81	92.59	30.43	38.89	29.41	65.96	20	75	52.17	40.79	71.43	27.27	60	24.1	63.33	14.16	28.74	10.38	28.42	14.16	37.39	16.76	18.6	30.58	50	11.86	14.75	6.22	12.9	28.65	17.43	11.39	16.28	10	22.08	9.47	30.3	12.43
CAT	HsaINT0028218	chr11:34456203-34456664	462	chr11:34456011-34456202=34456665-34456817:+	IR-S	13.51	37.5	2.13	37.14	0	27.27	10.34	53.85	23.08	50	10.64	52.38	3.03	40	8	30.16	50	24	45.45	38.46	36.84	4.76	66.67	21.43	13.33	2.7	66.67	9.8	42.86	17.65	60	0	3.7	5.26	10	11.11	11.11	0	14.29	5.88	0	0	9.09	8.57
CAT	HsaINT0028219	chr11:34456818-34461250	4433	chr11:34456665-34456817=34461251-34461389:+	IR-S	8.22	45.41	9.04	62.26	12.5	64.71	15.24	77.67	4.76	64.82	11.05	33.15	12.78	63.54	10.92	17.61	54.67	17.11	44.38	2.44	35.02	16.4	37.39	21.59	54.59	0	46.84	8.67	63.05	14.55	35.8	33.04	58.79	33.19	64.07	15.79	49.73	33.04	27.92	25.43	58.61	25.77	33.28	21.19
CBFA2T2	HsaINT0028342	chr20:33623297-33624763	1467	chr20:33623115-33623296=33624764-33625017:+	IR-C	22.62	90.13	19.45	74.31	5.56	89.45	26.59	79.87	36.63	87.69	30.07	80.23	49.28	91.51	50.75	52.36	83.44	47.92	75.41	36.89	69.37	36.68	82.25	23.91	72.46	53.22	59.28	43.72	78.86	55.52	77.82	18.17	71.77	25.32	68.2	31.68	59.6	17.09	70.77	26.11	56.5	18.35	49.28	26.92
CBR4	HsaINT0028432	chr4:168990329-169002070	11742	chr4:169002071-169002205=168987591-168990328:-	IR-C	17.65	61.11	4	56.52	6.67	52.94	9.68	100	12.12	54.17	15.56	52	13.04	70.59	23.4	15.66	58.33	24	50	24.14	46.15	21.21	42.86	14.29	70	18.18	71.43	14.29	36.84	8.2	31.58	25	51.72	33.33	38.46	29.03	44.44	15.15	33.33	14.29	30.43	7.32	61.9	12
CBS	HsaINT0028449	chr21:43053648-43053861	214	chr21:43053862-43053983=43053191-43053647:-	IR-S	71.08	65.59	75.88	65.7	76.1	72.83	69.21	62.92	75.71	69.85	65.97	67.85	71.88	68.18	68.82	76.67	75.72	81.82	72.35	81.5	77.34	81.74	81.59	89.66	86.57	83.74	79.66	78.64	80.19	79.65	77.58	95.17	90.27	93.94	91.29	95.81	90.13	95.38	92.67	94.21	93.93	91.24	90.54	94.03
CBX3	HsaINT0028488	chr7:26201827-26202970	1144	chr7:26201704-26201826=26202971-26203022:+	IR-C	8.67	51.77	9.48	36.79	7.8	37.9	6.9	47.54	8.21	43.28	5.28	53.95	9.51	58	9.57	15.46	32.32	12.57	41.82	15.14	52.02	16	53.49	19.7	41.92	14.88	45.58	14.16	40	11.23	34.96	23.59	33.94	21.98	36.73	25.21	35.93	21.07	34.44	20.54	37.13	16.53	45.56	14.37
CC2D1A	HsaINT0028524	chr19:13919203-13919817	615	chr19:13919130-13919202=13919818-13919951:+	IR-S	3.76	72.57	7.78	70.76	5.53	68.23	8.18	77.41	8.07	89.73	4.6	82.11	4.87	69.54	14.93	66.22	92.9	76.07	93.87	63.11	90.78	52.3	83.79	37.05	80.89	42.39	87.21	60.77	85.95	73.4	96.83	35	75.2	29.29	81.88	39.57	87.09	43.55	73.51	51.05	79.16	30.05	77.48	40.03
CC2D1A	HsaINT0028525	chr19:13919952-13920556	605	chr19:13919818-13919951=13920557-13920668:+	IR-C	0	73.96	6.38	80.28	6.67	77.38	11.86	81.48	15.38	77.51	22.73	78.3	3.57	82.01	16.67	72.97	96.36	88.57	94.82	77.78	91.04	68.42	90.28	41.18	74.44	50	93.24	75.76	88.85	88.24	98.1	62.96	82.7	45.45	85.28	43.59	90.53	54.29	77.54	46.15	88.89	39.13	80.09	58.62
CC2D1B	HsaINT0028567	chr1:52361133-52361512	380	chr1:52361513-52361616=52360974-52361132:-	IR-S	22.22	70.73	14.29	73.77	25	73.53	12	75.68	9.09	66.67	100	65.08	0	48.15	57.14	20	78.18	40	61.54	66.67	67.38	11.11	59.22	25	80	20	70.79	55.56	62.26	0	62.96	12.5	39.29	8.57	44.19	29.41	47.17	13.04	45.45	17.65	49.3	7.69	36.84	12.5
CC2D2A	HsaINT0028605	chr4:15511424-15514706	3283	chr4:15511247-15511423=15514707-15514869:+	IR-S	4.35	33.33	3.7	7.69	14.29	9.09	11.11	55.56	36.84	27.27	26.32	16.67	11.11	33.33	33.33	20	63.64	50	21.43	24.32	20	50	0	4.35	16.67	22.58	23.08	20	40	52.38	18.18	6.25	20	0	23.08	14.29	0	0	12.5	0	0	12.5	0	3.45
CCAR1	HsaINT0028632	chr10:68756484-68757293	810	chr10:68756273-68756483=68757294-68757377:+	IR-S	2	61.29	2.94	54.38	2.17	44.57	3.82	58.84	5.93	47.13	11.36	62.54	9.38	43.78	14.84	23.46	54.29	28.46	61.29	10.42	63.09	10	54.9	11.67	47.41	12.32	65.35	14.96	64.91	17.69	48.1	12.57	48.54	13.79	42.66	10.73	34.29	9.83	44.93	8.24	47.11	3.03	44.33	9.71
CCBL1	HsaINT0028663	chr9:128833644-128833739	96	chr9:128833740-128833826=128833113-128833643:-	IR-S	1.69	37.07	2.86	26.81	8.43	34.85	3.23	20.7	7.69	31.49	7.69	28.1	0	32.99	4.92	10.64	44.65	20	65.31	5.66	50.57	13.33	65.56	10.34	61.67	13.51	48.09	14.29	52.38	7.46	41.44	9.09	64.44	15.79	69.37	18.92	56	26.09	60.38	25.58	47.46	35.48	73.03	8.57
CCDC106	HsaINT0028735	chr19:55648278-55649001	724	chr19:55647588-55648277=55649002-55649077:+	IR-S	17.95	75	22.58	72.09	29.73	92.59	31.58	74.36	30.77	100	64.71	65.52	25	92.16	21.31	29.41	87.5	53.85	44.44	77.78	68	16.67	85.45	50	94.12	33.33	78.38	66.67	72.73	30.77	60	39.02	69.49	38.1	61.54	38.03	70.53	55.22	77.22	36.26	79.71	36.84	69.49	43.4
CCDC107	HsaINT0028743	chr9:35660859-35660939	81	chr9:35660766-35660858=35660940-35661503:+	IR-S	73.74	74.6	80.56	76.6	72.73	77.05	68.29	86.84	81.25	85.07	79.66	79.71	60	74.36	75	81.82	75	87.18	81.58	68.42	86.58	80.58	81.82	87.8	82	84.07	88.76	68.42	74.77	81.82	77.59	80.24	78.57	77.2	78.18	77.56	84.88	75.85	89.42	83.81	87.37	80.91	71.84	69.23
CCDC120	HsaINT0028868	chrX:49068091-49068543	453	chrX:49067176-49068090=49068544-49069858:+	IR-S	97.06	100	85.37	100	100	100	100	98.36	100	100	100	100	100	100	100	100	100	100	93.94	95.24	93.94	100	96.61	94.87	95.56	93.75	85	93.75	96.97	91.67	96.55	20	46.22	29.03	42.11	24	39.13	20.75	40.95	14.67	37.5	26.32	38.33	22.86
CCDC120	HsaINT0028873	chrX:49065099-49065453	355	chrX:49065036-49065098=49065454-49065628:+	IR-S	0	45.83	8.33	44.83	4	51.22	2.7	36.36	0	72.41	4.76	53.57	6.25	35.29	4	6.25	79.31	12	90.48	10	72.97	33.33	88.89	17.65	48.84	14.29	82.35	23.08	52.94	13.33	64.29	6.67	48.65	19.15	50.72	12.5	50	12.2	51.72	7.32	47.06	13.51	48.39	15.25
CCDC124	HsaINT0028901	chr19:17935192-17936409	1218	chr19:17935096-17935191=17936410-17936579:+	IR-C	35.14	50.48	50	50	35.29	59.42	39.62	49.09	50	88.89	41.18	52.73	20	38.71	45.45	63.64	52.94	25	26.32	63.64	37.04	73.33	76.92	85.71	70.37	55.56	73.91	100	47.83	66.67	23.08	36	50	41.18	64.71	40	44	63.64	78.95	69.23	42.86	39.13	40.74	36.36
CCDC130	HsaINT0028954	chr19:13759011-13759099	89	chr19:13758868-13759010=13759100-13759272:+	IR-S	35.48	80.15	19.15	84.75	31.91	78.57	31.03	80	58.33	77.57	58.97	91.11	45.95	88.24	46.15	28.89	65.52	34.29	55.66	46.99	72.62	30.53	69.03	28.26	62.24	42.06	75.78	40	75.23	37.37	60.78	34.13	70.33	39.06	68.04	36.28	60.45	42.65	70.7	46.97	70.75	42.86	62.9	44.78
CCDC130	HsaINT0028955	chr19:13759273-13762298	3026	chr19:13759100-13759272=13762299-13762437:+	IR-S	17.24	22.15	8.77	39.05	15.56	25.18	7.32	33.33	27.27	35	11.76	38.46	20	32.85	18.18	26.83	39.66	29.55	42.22	16.81	37.17	25.98	25	19.3	31.76	11.48	32.44	15.6	37.5	21.5	51.14	17.19	25.85	20	16.67	10.97	16.83	18.62	25.25	18.42	24.71	14.04	20.41	12.5
CCDC136	HsaINT0029006	chr7:128807546-128809449	1904	chr7:128807360-128807545=128809450-128809644:+	IR-S	25.93	63.33	23.08	70.45	34.38	84.11	36.36	79.66	37.5	93.41	33.33	87.04	29.73	76.74	56.25	20.93	74.36	30.77	65.35	20.69	65.3	43.48	60.98	58.97	74.55	31.25	74.68	51.85	76.06	28.21	58.49	50	59.52	45.76	41.67	40	50.4	65.08	73.44	21.95	53.64	44.83	52.67	63.27
CCDC136	HsaINT0029007	chr7:128809645-128810138	494	chr7:128809450-128809644=128810139-128810366:+	IR-S	30.43	14.29	22.58	49.06	12.5	43.96	15.79	30.97	24.32	35.95	17.24	38.85	7.14	17.95	21.05	22.45	22.29	20.93	29.41	16.88	26.84	20	20.5	19.15	24.32	9.52	19.27	24.14	23.56	22.58	28.46	48	25.35	31.58	11.11	37.14	20.41	31.18	31.61	34.48	14.81	27.27	28.64	40.98
CCDC136	HsaINT0029008	chr7:128810367-128811799	1433	chr7:128810139-128810366=128811800-128812312:+	IR-S	21.43	42.11	31.58	68.99	29.41	69.11	7.32	56.46	40.54	55.93	26.67	51.15	19.15	31.76	22.22	41.18	75.54	17.65	51.22	27.27	57.67	33.33	57.14	48.57	69.57	19.57	48.33	48.72	67.01	23.08	57.89	75.61	62.03	57.5	31.84	44.83	51.16	71.43	80.71	50.94	43.17	49.33	39.33	68.75
CCDC136	HsaINT0029009	chr7:128812313-128812707	395	chr7:128811800-128812312=128812708-128812929:+	IR-S	18.31	21.74	16.88	44.3	16.92	43.57	5.56	23.36	12.5	46.94	26.67	42.16	3.33	19.71	26.67	21.13	31.82	15.25	24.8	13.64	22.57	26.83	19.72	31.15	27.51	18.37	22.45	17.89	28.57	11.43	17.13	34.83	20.8	39.53	20.23	24.59	20.35	23.33	20.49	21.62	10.27	29.11	20.13	26.21
CCDC136	HsaINT0029010	chr7:128812930-128814637	1708	chr7:128812708-128812929=128814638-128814919:+	IR-S	33.33	30.99	32.26	59.62	32.69	62.18	16.67	47.21	45.83	68.53	16.67	61.94	11.39	28.89	33.33	40	51.87	40.19	42.07	32.26	48.28	48.8	31.81	43.43	40.61	33.33	41.3	43.48	43.06	51.16	45.92	52.29	28	66.67	25.36	63.01	34.22	63.78	38.52	34.09	21.99	35.71	33.12	63.89
CCDC136	HsaINT0029011	chr7:128814920-128815613	694	chr7:128814638-128814919=128815614-128815931:+	IR-S	23.81	38.84	42.86	66.14	22.73	63.58	20.99	42.86	52.94	72.92	20.88	64.65	33.33	40.59	43.24	44.68	50.84	42.37	54.59	50.65	62	42.17	58.39	60.71	69.14	49.3	52.29	45	72.62	47.83	56.04	87.5	63.49	79.49	63.2	86.11	62.34	81.08	60	66.67	46.99	65.52	70.73	72
CCDC136	HsaINT0029012	chr7:128815932-128817757	1826	chr7:128815614-128815931=128817758-128817864:+	IR-S	100	100	100	100	100	100	100	98.28	100	100	100	100	100	100	100	100	97.69	92.31	97.62	87.5	94.37	84.81	78.81	93.75	95.79	100	87.6	100	99.12	100	100	62.07	34.99	67.31	34.95	73.13	38.76	63.16	36.87	56.67	30.19	55.14	45.93	56.44
CCDC136	HsaINT0029013	chr7:128817865-128821798	3934	chr7:128817758-128817864=128821799-128822129:+	IR-S	87.1	100	100	100	100	99.06	100	100	100	100	95.56	98.39	100	97.89	94.87	87.5	98.78	88.1	93.71	82.73	91.07	79.13	76.09	87.76	93.27	82.18	89.84	92.38	95.78	90.48	97.48	24	43.01	36.89	39.94	30.19	41.66	30.17	39.61	22.77	35.36	24.56	40.4	23.92
CCDC14	HsaINT0029046	chr3:123949133-123956045	6913	chr3:123956046-123956115=123948896-123949132:-	IR-C	23.08	92.31	31.25	81.82	40	89.36	69.23	97.1	41.67	90.91	72.73	83.33	41.18	84.91	81.82	66.67	81.82	72.5	89.74	64	91.3	88.89	84.21	87.1	80	90.24	94.87	88.46	94.44	68.75	95.56	80	88.24	68	100	84.62	81.82	75	90.91	83.33	84	77.78	100	40
CCDC142	HsaINT0029076	chr2:74481539-74481816	278	chr2:74481817-74483230=74481452-74481538:-	IR-S	33.33	45.45	33.33	73.33	20	37.93	33.33	41.18	0	73.91	0	53.85	20	37.5	7.69	20	30	20	41.18	27.27	52.94	25.93	85.71	13.04	53.85	17.65	51.52	33.33	42.86	20	47.37	17.65	48.39	20	41.67	0	44.68	15.38	50	6.25	57.58	28.57	56.1	18.52
CCDC142	HsaINT0029083	chr2:74474803-74474915	113	chr2:74474916-74475115=74472832-74474802:-	IR-S	0	57.58	23.08	45	18.18	57.69	0	45.83	23.08	64.91	45.45	72.73	40	72	0	42.86	45.45	20	69.57	23.08	46.67	27.27	54.55	25	66.67	8.11	57.89	33.33	64	14.29	71.43	35.85	46.99	24.32	64.71	35.29	55.93	31.43	50.88	30	53.25	15.79	69.01	16.67
CCDC157	HsaINT0029299	chr22:30366249-30369431	3183	chr22:30365990-30366248=30369432-30369603:+	IR-S	20	44	77.78	60	36.84	24.14	33.33	73.33	60	80	55.56	46.15	50	60	22.22	60	10	44.44	42.86	45.45	28.21	45.45	24.14	60	41.46	50	40.54	46.67	17.65	42.86	40	74.19	55.56	50	40	100	83.33	51.72	80.95	78.57	45.95	55.56	37.93	65.22
CCDC157	HsaINT0029301	chr22:30370951-30371649	699	chr22:30370326-30370950=30371650-30371727:+	IR-S	15.79	65.52	0	60	28.57	76.19	6.67	84.62	40	66.67	5.26	70.37	11.11	51.72	44.44	45.45	62.96	100	88.89	40	74.65	30.77	79.59	47.37	77.05	38.46	67.65	57.14	87.5	33.33	77.78	38.46	70.37	35.14	44	20	48.15	29.63	75.61	10.34	55.56	36.36	54.84	0
CCDC157	HsaINT0029302	chr22:30371728-30372074	347	chr22:30371650-30371727=30372075-30372286:+	IR-S	0	39.53	0	70.37	6.67	65.52	27.27	83.33	25	63.64	9.09	60	10	42.86	20	20	58.33	9.09	65.52	33.33	55.34	20	57.89	20	48.72	6.67	46.67	9.09	46.34	42.86	87.5	5.88	42.22	27.27	57.89	23.08	42.86	28.57	66.67	16.67	52	4.76	73.91	7.69
CCDC159	HsaINT0029330	chr19:11354697-11354872	176	chr19:11354580-11354696=11354873-11354944:+	IR-S	0	42.86	33.33	64.71	33.33	92	0	64.29	42.86	85.71	33.33	87.5	28.57	48.57	42.86	20	93.75	50	91.11	33.33	85.71	14.29	84	33.33	89.47	25	61.11	25	80.77	41.18	83.33	77.78	93.75	66.67	87.76	66.67	93.65	25.93	84.91	42.86	100	50	81.82	33.33
CCDC159	HsaINT0029334	chr19:11351004-11351905	902	chr19:11350808-11351003=11351906-11351973:+	IR-C	25	93.1	20	82.61	42.86	93.33	0	81.82	14.29	76	20	78.57	20	83.78	33.33	100	66.67	33.33	71.43	26.32	77.01	40	85.71	0	70.59	33.33	53.19	66.67	62.79	33.33	72.09	46.67	63.93	25	76.92	25	70.21	14.29	56.25	17.65	65.22	9.09	66.67	28.57
CCDC159	HsaINT0029337	chr19:11353573-11353791	219	chr19:11353451-11353572=11353792-11353874:+	IR-C	25	95.24	7.69	87.5	18.18	71.43	40	83.78	6.67	85.71	66.67	93.1	42.86	81.48	50	33.33	91.3	42.86	100	41.18	92.38	60	88.24	33.33	85.71	33.33	97.14	50	84.38	83.33	83.33	60	77.14	53.85	72.82	41.18	82.93	41.67	87.69	36.84	95.6	46.67	80.65	37.5
CCDC24	HsaINT0029429	chr1:43991747-43991846	100	chr1:43991608-43991746=43991847-43992004:+	IR-C	40.54	49.02	37.5	78.72	66.67	93.75	65.22	83.33	75	72.41	80	75	57.14	94.12	64.29	42.86	53.85	26.32	36.59	52.94	58.14	20	57.14	52.38	64.71	100	33.33	57.89	47.06	66.67	30	33.33	36.84	33.33	38.89	45.95	53.25	29.03	56.1	44.44	40.35	62.5	33.33	46.67
CCDC24	HsaINT0029430	chr1:43992005-43992211	207	chr1:43991847-43992004=43992212-43992387:+	IR-C	48.29	95.66	81.58	88.98	66.29	93.39	53.44	93.54	25.98	94.99	45.06	87.14	33.12	95.89	52.54	59.63	91.23	44.22	95.71	62.61	100	100	87.39	49.64	91.45	49.4	100	65.24	97.02	61.54	89.75	45.57	85.27	61.56	91.04	66.32	88.41	80.31	96.12	62.85	94.62	83.85	93.17	76.97
CCDC24	HsaINT0029431	chr1:43992388-43992522	135	chr1:43992212-43992387=43992523-43992639:+	IR-C	39.29	49.45	17.39	57.33	25	68.12	38.46	50	33.33	58.33	44.83	51.28	46.67	62.07	37.7	6.67	57.14	0	62.5	33.33	65.52	27.27	28	33.33	66.67	37.5	27.78	55.56	26.83	25	54.29	44	40.54	47.06	40.91	61.9	34.62	60	37.5	38.46	43.75	42.86	78.38	42.86
CCDC24	HsaINT0029433	chr1:43993965-43995107	1143	chr1:43993887-43993964=43995108-43995162:+	IR-C	20.59	61.43	12.94	51.92	16.22	52.94	26.92	62.6	10.45	39.39	12.68	53.4	11.39	46.99	11.11	25	41.94	25.93	30.61	14.29	28.36	17.65	31.03	0	54.17	16.67	41.94	12	40.3	14.29	34.43	16.28	41.46	42.86	42.5	21.74	31.76	18.75	34.38	16.13	24.44	20	23.08	11.76
CCDC40	HsaINT0029568	chr17:80065607-80081545	15939	chr17:80065485-80065606=80081546-80081789:+	IR-C	0	47.37	57.14	54.84	20	42.86	0	70.83	14.29	59.26	4.35	45.68	0	35	33.33	25	23.91	5	18.75	23.08	15.35	0	16.48	17.65	20.48	9.09	5.82	13.33	13.6	6.67	17.56	9.09	18.75	6.54	6.67	17.24	25.81	11.86	25.33	13.04	19.19	5.77	9.91	9.76
CCDC40	HsaINT0029569	chr17:80081790-80081875	86	chr17:80081546-80081789=80081876-80082058:+	IR-S	16.67	51.72	20	69.23	14.29	58.62	33.33	53.85	11.11	71.43	20	86.67	66.67	44.44	75	50	58.82	60	68.18	100	68.97	77.78	49.02	30.43	61.76	35.71	47.22	50	57.14	53.85	62.16	51.61	47.95	55.93	70	81.82	94.59	56.76	84.21	56.52	50.98	61.9	68.35	72.22
CCDC40	HsaINT0029573	chr17:80087777-80088010	234	chr17:80087607-80087776=80088011-80088102:+	IR-S	0	26.76	14.29	27.27	20	37.5	100	45.45	42.86	56.52	15.79	38.78	25	30.91	9.09	11.11	38.46	36	46.88	36	55.32	0	47.17	16.67	44	15.38	36.56	10.64	54.9	11.11	50	19.48	29.73	26.67	46.09	35.48	59.46	38.89	67.16	12.73	45.86	17.39	37.85	27.27
CCDC40	HsaINT0029580	chr17:80047403-80048582	1180	chr17:80047279-80047402=80048583-80048761:+	IR-C	17.65	84.09	12	83.67	10	65.62	15.79	77.78	21.43	88.89	27.78	93.02	44.83	74.55	50	57.14	87.8	57.89	78.57	23.81	71.19	14.29	55.56	50	69.91	33.33	86.32	54.55	80	40	89.58	66.2	86	32.35	61.8	15.62	40.62	30	59.26	39.39	67.27	45.63	74.15	49.02
CCDC51	HsaINT0029698	chr3:48435137-48440095	4959	chr3:48440096-48440119=48434817-48435136:-	IR-S	39.83	100	13.93	0	73.18	14.29	10.83	100	26.89	10.83	66.35	100	26.7	100	54.84	42.62	20	13.45	39.83	19.54	13.93	45.45	100	10.97	71.31	23.08	24.73	22.91	19.54	0	0	31.26	35.93	22.91	100	51.72	37.78	74.91	100	31.37	42.62	33.08	33.33	23.08
CCDC57	HsaINT0029725	chr17:82193831-82193981	151	chr17:82193982-82194139=82193756-82193830:-	IR-S	100	66.67	100	56.25	100	64.52	100	100	100	72.5	33.33	66.2	100	100	60	5.88	54.17	42.86	59.49	50	68.03	64.1	86.89	81.82	74.01	53.85	78.01	29.41	59.09	7.69	65.52	41.18	64.71	70	79.1	71.43	88.1	100	86.49	45.95	88.24	86.67	92.81	18.18
CCDC61	HsaINT0029759	chr19:46016394-46016693	300	chr19:46016318-46016393=46016694-46016833:+	IR-S	3.7	40	0	74.36	0	58.9	2.56	57.89	0	49.09	4.76	75.9	2.22	70	6.67	21.21	87.79	11.11	89.47	0	81.57	33.33	85.11	0	60.66	21.43	87.5	9.09	77.78	27.27	78.42	20	57.58	20	76.92	20	74.47	0	81.82	0	66.67	7.69	71.43	9.09
CCDC66	HsaINT0029822	chr3:56615273-56615921	649	chr3:56615128-56615272=56615922-56616053:+	IR-C	4.35	17.14	9.09	32	0	30.16	0	37.5	11.11	28.16	11.76	34.55	36.84	24.44	20	0	29.03	12.5	50	27.27	40.74	11.11	40.43	3.7	26.09	36.36	33.33	25	29.63	0	45.45	12.5	13.33	23.81	56.25	33.33	40	17.65	36.84	0	27.27	20	26.83	4.76
CCDC66	HsaINT0029829	chr3:56566760-56566949	190	chr3:56566594-56566759=56566950-56567053:+	IR-C	15.08	38.71	0	42.55	22.65	46.7	19.36	55.14	19.36	38.07	15.08	61.36	8.43	33.33	23.08	28.57	100	25	55.56	33.33	65.14	23.08	44.66	46.1	9.09	35.59	70.77	27.76	43.95	81	81.28	0	0	0	11.11	0	0	22.13	33.33	23.49	0	0	16.67	0
CCDC77	HsaINT0029949	chr12:438555-440616	2062	chr12:438335-438554=440617-440742:+	IR-S	4.55	60.82	8.47	35	5.66	35.78	5.17	45.3	5.62	60.42	11.11	48.65	1.33	52.58	9.68	11.86	55.17	20.51	46.67	9.59	51.58	6.17	43.75	9.59	41.18	4.85	49.09	6.25	32.53	16.98	42.42	23.08	37.14	31.82	76	16.67	42.86	17.65	75	15.15	60	12	41.46	9.09
CCDC82	HsaINT0030012	chr11:96359179-96364979	5801	chr11:96364980-96365150=96358993-96359178:-	IR-S	0	35.71	14.29	52	4.35	44.68	17.65	62.16	10.34	50	25	25	10.53	18.42	9.09	29.58	53.85	30.43	56.76	13.33	35.63	11.86	33.33	2.22	26.32	13.04	32.31	12.2	33.33	20.59	55.56	2.65	6.32	1.12	6.38	3.23	16.36	6.47	9.38	4.35	8.2	5.56	14.29	2.86
CCDC84	HsaINT0030028	chr11:118999110-119010763	11654	chr11:118999011-118999109=119010764-119010830:+	IR-S	24.32	93.01	26.32	86	46.67	85.96	51.35	96.52	29.17	91.61	37.78	85.86	48.72	91.72	51.85	47.83	91.67	55.56	82.86	36.36	72.15	44	100	42.86	100	50	48	35.71	61.9	27.27	74.19	68.42	91.04	54.84	80	70	81.82	61.54	67.35	51.72	90	45.45	84	64.71
CCDC84	HsaINT0030029	chr11:119010831-119011220	390	chr11:119010764-119010830=119011221-119011283:+	IR-S	9.52	29.19	16.67	30	21.05	39.06	15.15	42.69	18.92	33.93	23.53	36	12	34.94	20	36.36	33.33	30.61	46.67	14.29	44.44	30.77	64.44	30.77	27.66	18.37	38.46	28	33.33	21.43	35.71	30.43	35.06	18.52	30.67	41.67	31.03	33.33	26.58	17.65	31.18	15.38	34.18	12
CCDC84	HsaINT0030030	chr11:119011284-119011938	655	chr11:119011221-119011283=119011939-119012003:+	IR-S	9.02	54.98	22.45	70.73	12.57	58.19	31.31	63.37	34.55	65.48	34.12	66.77	43.23	47.63	42.48	51.02	67.48	26.96	52.24	26.15	66.9	19.53	86.27	28.36	51.09	14.16	60.22	36.84	73.58	38.46	73.33	34.55	88.52	62.5	72.7	51.3	77.62	84.31	76.92	57.25	76.24	51.52	64.38	60
CCDC84	HsaINT0030031	chr11:119012004-119012148	145	chr11:119011939-119012003=119012149-119012254:+	IR-S	9.09	23.14	18.52	28.47	35.48	30.36	15.38	30.32	25.93	22.39	10	20.72	11.54	19.69	34.62	23.08	42.86	35.71	40.91	25	27.47	20	34.25	14.29	31.65	23.53	32.31	5.88	49.02	8.11	39.39	20.75	47.06	25.93	32.65	21.74	50	60	46.03	17.65	36.45	22.58	38.82	20
CCDC84	HsaINT0030033	chr11:119013263-119014993	1731	chr11:119013232-119013262=119014994-119015083:+	IR-S	0	22.28	5.88	16.46	6.42	19.11	0	18.84	19.62	18.52	10.34	25.93	10.66	25.79	3.67	14.63	25.93	15.79	18.72	6.56	37.08	0	14.47	18.39	20.23	14.43	22.31	12.91	36.21	6.42	41.18	20	18.23	6.84	14.54	5.88	14.63	3.31	11.25	9.53	11.91	8.56	15.18	14.29
CCDC88A	HsaINT0030068	chr2:55299920-55301205	1286	chr2:55301206-55301277=55299839-55299919:-	IR-S	0	18.18	3.45	6.98	4	5.48	1.05	31.15	0	9.8	11.11	20	4.23	7.69	5.75	14.81	44.83	21.05	30.43	17.02	19.3	24.32	12.2	11.34	20.69	13.92	26.61	11.11	21.74	21.05	50	18.02	25.18	15	14.63	20.41	18.1	27.59	28.93	17.43	13.92	20.3	29.41	21.84
CCDC88A	HsaINT0030069	chr2:55296524-55299838	3315	chr2:55299839-55299919=55296258-55296523:-	IR-C	13.85	36	20.75	27.5	8.11	30.2	17.78	44.74	18.42	23.64	21.95	34.25	21.74	30.77	21.65	22.89	65.85	24.27	73.33	35.59	55.1	37.08	68.18	29.87	45.83	45.63	50.72	45.71	45.83	27.47	72	38.56	50	40.58	32.39	41.1	42.86	40.93	53.54	34.88	38.03	42.19	48.57	47.45
CCDC88A	HsaINT0030072	chr2:55291776-55295596	3821	chr2:55295597-55296056=55291676-55291775:-	IR-C	23.08	33.33	10.45	21.74	21.65	19.5	25.71	27.71	20	18.18	24.39	24	18.92	15.15	14.53	26.53	30.67	24.68	48.94	27.27	26.25	25.62	31.91	25	34.69	27.66	23.48	26.09	37.78	17.65	29.17	5.77	6.25	7.1	12.75	3.88	3.91	4.62	7.32	4.55	17.65	5.2	7.94	7.18
CCDC88B	HsaINT0030084	chr11:64343915-64343996	82	chr11:64343778-64343914=64343997-64345157:+	IR-S	0	15	0	16.67	0	16.59	0	13.55	0	16.81	1.89	11.64	0	12.55	4.76	21.74	44.79	36.36	48.87	23.81	42.64	20	42.45	14.29	31.52	25	41.9	0	39.39	8.11	53.33	0	64.71	0	44	42.86	45.45	0	57.89	11.11	17.95	33.33	50	0
CCDC88B	HsaINT0030087	chr11:64349669-64351159	1491	chr11:64349551-64349668=64351160-64351255:+	IR-C	47.83	87.36	47.83	85.66	40.74	85.07	66.67	91.18	23.53	88.5	50	94.2	77.78	89.24	58.97	66.67	90.27	75	90.8	48.39	85.31	36	74.34	33.33	70.95	42.86	82.14	45.45	83.65	35.48	90.86	25	48.15	100	39.39	33.33	69.57	60	67.35	100	64.71	27.27	55.93	60
CCDC88B	HsaINT0030088	chr11:64351256-64351475	220	chr11:64351160-64351255=64351476-64351616:+	IR-S	33.33	70.73	18.18	71.16	28.57	73.1	23.81	73.95	20	66.18	33.33	81.14	21.74	76.16	35.29	50	73.68	41.18	80.17	16.67	73.06	21.95	62.94	22.22	61.34	20	61.51	33.33	77.67	39.13	76.4	33.33	45.45	11.11	45.95	14.29	56.92	0	33.33	0	60	0	72.55	0
CCDC90B	HsaINT0030154	chr11:83280261-83285872	5612	chr11:83285873-83286334=83280141-83280260:-	IR-S	30.77	74.45	44.61	48.43	40.41	35.33	44.85	39.31	33.53	51.66	38.3	57.19	40.48	59.3	28.88	45.66	47.99	45.08	57.79	45.69	36.06	38.5	58.12	26.55	42.15	45.95	51.39	42.15	42.15	34.3	30.69	38.98	37.59	39.87	39.84	45.53	66.02	41.92	45.55	50.75	38.7	40.48	44.74	39.84
CCDC93	HsaINT0030190	chr2:117935580-117936701	1122	chr2:117936702-117936739=117935495-117935579:-	IR-C	9.09	69.25	8.14	79.38	20.15	69.75	27.46	67.21	26.78	43.09	15.05	44.55	26.78	90.45	13.22	28.78	86.61	27.69	88.03	50.77	76.27	59.4	90.38	84.98	75.46	48.83	85.34	58.33	68.75	56.04	83.3	69.96	100	83.83	79.81	53.33	84.72	80.5	100	73.28	100	68.65	70.64	49.54
CCNA2	HsaINT0030324	chr4:121822647-121823415	769	chr4:121823416-121823933=121822403-121822646:-	IR-S	0.39	0	0.21	0	0	2.29	0.17	2.38	0	2.22	0.25	2.8	0	5.26	0.78	0.44	1.49	0	1.11	0.16	2.93	0.38	3.85	0.22	1.47	0.23	6.43	0.38	1.2	0.74	1.31	100	100	10	44	100	100	28.57	100	14.29	41.18	10.71	40.74	9.09
CCNG1	HsaINT0030448	chr5:163437660-163437759	100	chr5:163437571-163437659=163437760-163437804:+	IR-S	98.19	95.79	95.78	97.25	97.41	95.69	94.19	93.52	95.52	96.85	97.2	98.69	95.63	98.39	90.65	96.18	97.4	96.13	98.77	96.98	96.89	97.31	100	99.19	100	95.81	97.73	99.46	100	95.05	98.1	93.5	100	98.44	100	100	96.72	93.39	91.3	96.3	100	94.64	100	98.54
CCNL1	HsaINT0030497	chr3:157153157-157158865	5709	chr3:157158866-157158975=157153036-157153156:-	IR-C	20.69	66.67	30.43	61.74	24.53	58.14	26.15	65.96	27.59	69.14	36.59	65.91	26.32	71.43	30.12	46.21	74.79	34.23	59.32	31.87	39.9	40	36.96	41.54	31.67	24.14	37.93	28.57	48.2	35.1	63.73	16.92	20	13.64	19.3	11.54	21.21	20	9.43	6.06	27.27	12.94	25.42	7.14
CCNL1	HsaINT0030498	chr3:157152242-157153035	794	chr3:157153036-157153156=157152177-157152241:-	IR-S	11.48	39.81	12.94	33.33	11.11	53.85	23.94	50.28	11.36	43.36	25.84	47.37	36.67	44.83	28.74	37.11	58.67	34.72	63.64	22.45	40.08	17.24	38.33	19.19	24.84	20.66	34.21	23.49	41.8	46.55	68.31	5.26	11.11	11.11	23.08	12	10.71	14.29	29.58	10.34	25.37	5	38.03	6.67
CCNL1	HsaINT0030499	chr3:157150382-157152176	1795	chr3:157152177-157152241=157150282-157150381:-	IR-S	30.43	90.06	39.62	81.05	33.33	79.89	57.14	78.76	28.36	81.82	44.26	71.97	58.49	80.95	46.48	41.57	68.72	40	49.09	44.33	66.36	30.43	71.67	36	71.9	39.76	65.59	54.64	72.31	30.43	72.05	44.26	79.71	50.77	65.22	44.19	70.15	30.23	52.38	30.77	69.7	43.75	63.16	35.85
CCNL2	HsaINT0030510	chr1:1390866-1393395	2530	chr1:1393396-1393460=1390766-1390865:-	IR-C	66.36	99.18	68.49	96.66	68.12	96.62	70.47	99.49	63.64	98.92	72.73	98.26	75.27	99.32	74.12	88.63	97.8	87.33	98.78	88.28	98.93	86.03	97.58	89.74	98.17	87.35	98.63	96.12	98.21	88.84	97.93	90.98	98.4	94.05	98.39	94.68	97.19	90.68	98.26	93.9	96.75	87.55	97.54	88.93
CCNT2	HsaINT0030525	chr2:134954380-134954480	101	chr2:134953230-134954379=134954481-134957014:+	IR-S	55.29	52.94	56.86	54.1	54.62	52.17	52.94	43.66	53.66	69.23	60	52.63	43.64	31.03	43.64	73.2	83.72	75.86	73.49	55.34	61.54	69.78	71.83	67.35	69.41	67.88	74.19	68.75	79.71	74.07	87.93	64.03	71.2	56.04	63.27	60	50.59	65.56	53.7	59.44	65.14	63.16	60.51	62.12
CCNT2	HsaINT0030531	chr2:134946147-134947735	1589	chr2:134946101-134946146=134947736-134947899:+	IR-S	18.22	46.36	24.12	45.8	18.08	89.84	30	62.73	13.54	71.1	34.23	38.35	22.74	66.43	17.72	40.77	73.88	51.28	67.08	41.63	52.02	56.07	62.23	45.04	55.06	49.46	79.81	49.42	72	55.47	59.65	47.4	38.75	46.69	56.61	39.56	37.5	41.5	52.93	20.26	35.56	23.18	54.63	35.01
CCS	HsaINT0030591	chr11:66599254-66599458	205	chr11:66599116-66599253=66599459-66599636:+	IR-S	19.47	92.94	16.36	86.97	17.97	82.84	17.98	86.49	19.58	89.92	26.51	83.1	18.23	91.85	25.65	32.46	80.21	33.33	74.63	31.23	78.89	34.47	85.71	26.91	82.86	25.7	79.1	25.38	77.27	27.44	68.58	47.6	81.33	53.96	78.8	31.03	69.4	40.32	91.43	43.94	81.68	39.93	83.38	37.55
CCS	HsaINT0030592	chr11:66599637-66600488	852	chr11:66599459-66599636=66600489-66600549:+	IR-S	12.24	40.76	7.53	38.21	12.5	45.14	10.8	65.06	11.56	35.92	13.09	44.44	18.59	39.23	11.7	15.52	33.62	18.23	36.53	14.75	31.47	14.49	39.22	14.29	28.67	16.35	23.13	14.88	30.32	11.49	29.89	25.35	29.38	24.27	26.22	20	28.1	22.67	33.79	22.43	30.36	19.27	30.53	19.15
CD46	HsaINT0031156	chr1:207767824-207770320	2497	chr1:207767779-207767823=207770321-207770362:+	IR-C	16.67	54.41	16.81	57.8	18.18	58.07	30.34	80.06	59.42	78.69	43.06	71.23	34	48.75	39.07	42.86	44.3	42.22	57.78	32.39	45.21	44.44	70.49	36.23	70.15	31.87	49.33	30.84	40	29.58	44	62.07	90	57.89	77.22	53.85	79.44	64.71	90.62	58.97	90.16	50	76.47	54.72
CD47	HsaINT0031171	chr3:108047293-108049618	2326	chr3:108049619-108049651=108043094-108047292:-	IR-C	37.08	58.62	48.34	79.65	19.94	100	74.07	78.65	42.81	66.39	86.87	53.69	36.51	47.31	56.62	34.52	42.91	34.47	33.18	19.6	31.07	23.08	47.21	18.17	13.58	14.63	23.04	27.77	22.98	48.41	53.66	0.57	4.27	3.75	6.48	2.58	11.57	3.58	8.5	1.97	2.13	2.38	10.71	0.49
CD47	HsaINT0031179	chr3:108049652-108050577	926	chr3:108050578-108050602=108049619-108049651:-	IR-C	50.94	39.88	60.31	71.27	53.57	67.19	100	82.01	26.76	72.04	52.73	100	36.59	33.76	54.25	50.99	42.38	43.07	33.01	29.9	41.35	12.66	40.23	22.64	25.45	28.63	10.17	36.43	36.2	63.42	65.22	3.41	12.61	4.73	5.02	8.43	10.17	3.7	10.34	16.13	7.47	5.25	35	5.28
CDAN1	HsaINT0031430	chr15:42735680-42735874	195	chr15:42735875-42736078=42735510-42735679:-	IR-S	0	76	4	65	3.03	56.82	5.88	56.36	0	77.36	0	71.9	5.88	62.96	6.98	7.69	57.98	5.26	50.99	7.41	46.32	27.27	52	7.41	49.69	9.09	62.42	38.46	63.87	9.43	58.11	11.11	56.25	2.7	47.62	6.67	60	11.11	66.15	11.11	52.38	33.33	66.2	14.29
CDAN1	HsaINT0031434	chr15:42734048-42734225	178	chr15:42734226-42734346=42733938-42734047:-	IR-S	11.11	85.71	6.67	82	20	84.95	7.69	88.79	0	76.36	0	86.78	4.76	86.67	25	17.65	88.64	20	90.91	17.65	82.11	17.24	73.33	16.67	56.14	11.11	65.38	16.67	73.2	43.75	88.51	14.29	37.5	0	45.45	12.5	33.33	7.14	49.15	0	55	0	70.59	9.09
CDC16	HsaINT0031484	chr13:114272482-114272563	82	chr13:114272184-114272481=114272564-114272675:+	IR-S	55.7	66	68.92	60.89	50	70.73	47.73	59.67	70.41	66.67	61.19	55.16	60.93	64.15	55.15	50	52.99	67.86	60.44	63.16	61.59	60	61.63	65.71	67.47	54.14	58.9	51.82	53.94	61.54	60.3	69.57	73.04	75.64	74.23	65.38	70.89	70.71	81.33	72.66	74	75.61	68.52	84.4
CDC16	HsaINT0031489	chr13:114242281-114243256	976	chr13:114242121-114242280=114243257-114243348:+	IR-S	0	43.48	8.18	57.28	4.26	56.1	6.1	66.67	3.85	69.01	10.24	83.53	5	51.72	8.11	23.53	59.42	25.64	68.75	11.34	53.68	13.04	52.38	16	60	19.1	62.96	20.35	65.85	30.56	76.09	8.16	18.03	7.69	16.13	8.05	11.63	2.08	24	8.57	16.36	3.77	33.33	6.67
CDC16	HsaINT0031491	chr13:114243990-114244889	900	chr13:114243856-114243989=114244890-114244969:+	IR-S	2.44	38.64	1.41	42	3.6	47.57	7.28	63.64	5.62	54.63	9.72	79.37	5.17	55.56	9.35	26.32	77.61	26.05	63.22	23.91	62.42	17.89	53.33	16.05	43.48	12.82	62.64	26.45	67.06	32.65	73.24	7.87	19.61	6.67	12.5	11.63	32.39	5.88	18.52	4.48	19.4	4.35	34.29	8.57
CDC37	HsaINT0031602	chr19:10395344-10395434	91	chr19:10395435-10395543=10395228-10395343:-	IR-S	11.33	77.8	13.08	69.63	12.73	72.96	13.21	73.37	9.85	76.52	12.5	77.03	14.7	83.17	12.73	33.23	79.33	30.45	80.56	29.88	84.99	26.45	86.26	32.67	78.57	29.55	83.6	34.67	83.98	28.66	70.51	20.11	58.14	18.36	62.26	20.35	59.71	18.42	58.04	18.42	59.37	20.7	58.14	18.32
CDC42SE1	HsaINT0031752	chr1:151055994-151059478	3485	chr1:151059479-151059649=151055677-151055993:-	IR-C	5.34	18.85	5.32	27.42	3.43	22.89	4	24.22	3.66	27.85	7.63	25.03	3.6	11.33	3.35	4.27	11.53	13.47	12.65	9.37	15.96	8.35	16.91	8.07	10.93	4.04	19.54	3.81	16.78	4.23	10.37	14.89	27.64	19.12	32.38	20.61	26.7	16.27	28.89	17.25	30.7	13.33	37.48	9.53
CDC42SE1	HsaINT0031753	chr1:151055127-151055676	550	chr1:151055677-151055993=151055016-151055126:-	IR-S	12.26	65.56	11.16	56.99	12.69	60.76	12.32	64.24	12.95	67.63	14.31	59.35	11.79	63.04	11.31	27.92	45.73	32.42	68.87	22.25	56.68	23.19	71.95	25.67	58.4	30.06	66.08	22.96	56.26	19.91	43.09	27.29	60.74	32.03	58.52	32.31	55.8	33.03	66.91	31.8	60.76	30.41	61.32	21.66
CDC42SE1	HsaINT0031754	chr1:151054322-151055015	694	chr1:151055016-151055126=151054231-151054321:-	IR-S	9.73	34.29	6.83	31.13	6.4	32.94	7.58	47.67	6.93	41.38	6.48	39.88	7.1	31.03	7.94	20	34.27	27.54	37.66	12.78	42.44	17.89	49.38	23.85	31.51	12.57	40.7	19.14	41.12	15.92	34.25	16.7	27.47	16.58	29.79	18.6	31.34	16.1	39.77	15.23	35.45	15.32	30.98	15.45
CDCA4	HsaINT0031854	chr14:105010634-105011159	526	chr14:105011160-105011935=105009573-105010633:-	IR-S	100	97.59	100	98.48	99.49	100	100	100	100	100	100	100	100	100	100	98.9	100	99.42	100	100	99.24	100	97.78	100	100	99.35	97.42	100	100	98.93	100	100	100	100	100	100	100	100	100	100	100	100	100	100
CDH24	HsaINT0032148	chr14:23049944-23052472	2529	chr14:23052473-23052609=23049822-23049943:-	IR-C	3.33	54.4	10.09	60.53	7.04	58.01	7.14	64.89	7.25	51.13	8.51	68.49	11.11	64.63	1.37	72.66	96.5	59.42	95.02	49.28	94.41	51.06	93.32	37.78	88.33	45.95	95.1	71.01	93.78	52.73	90.63	44.74	92.65	59.14	79.87	27.78	78.18	59.57	89.41	36.73	74.71	43.21	88.43	34.62
CDH3	HsaINT0032174	chr16:68695924-68698190	2267	chr16:68695777-68695923=68698191-68699054:+	IR-S	6.51	26.76	5.14	10.78	6.19	15.83	5.84	26.28	6.58	11.46	5.12	28.93	3.89	15.28	5.19	33.33	42.86	27.27	80	8.57	45.45	33.33	50	5.26	7.69	20	26.67	42.86	38.46	36.84	33.33	100	100	11.11	47.37	33.33	50	0	25	11.11	33.33	38.46	4.76	14.29
CDK10	HsaINT0032366	chr16:89686798-89689251	2454	chr16:89686668-89686797=89689252-89689324:+	IR-C	9.68	43.41	14.29	54.26	0	52.45	25	51.41	18.75	54.15	11.11	45.1	28.21	49.74	17.39	20	60.21	31.25	46.74	31.82	57.56	50	53.06	12.2	54.39	9.09	36.08	20	39.09	9.09	60	14.29	41.77	21.74	46.81	22.22	39.84	21.74	52.17	10	48.65	8.33	40	17.65
CDK10	HsaINT0032369	chr16:89689325-89690552	1228	chr16:89689252-89689324=89690553-89690624:+	IR-C	4.53	25.39	2.03	29.77	5.63	26.36	6.38	30.83	1.75	29.76	3.45	26.66	7.87	28.09	8.53	21.66	51.14	18.98	51.89	9.97	38.79	12.3	41.08	10	32.09	12.23	29.83	20.71	40.98	10.63	43.96	16.88	26.84	16.82	34.55	21.31	34.46	7.9	47.3	13.46	32.06	6.93	23.17	3.45
CDK10	HsaINT0032374	chr16:89693327-89693397	71	chr16:89693274-89693326=89693398-89693467:+	IR-S	16.42	68.99	15.22	70.89	22.45	64.97	24.53	78.82	27.03	67.42	32.31	70.03	24.14	69.14	25.25	64.29	90.89	71.15	89.86	48.94	86.62	55.1	86.38	59.52	83.91	45.86	81.85	53.19	84.04	50.75	87.23	62.67	84.27	71.11	87.53	37.21	82.09	60	85.95	50.72	83.85	44.55	87.44	44.83
CDK10	HsaINT0032375	chr16:89693468-89694172	705	chr16:89693398-89693467=89694173-89694232:+	IR-S	16.88	81.28	19.77	81.94	24.1	84.93	28.07	92.41	20.93	82.6	19.54	86.99	30.88	81.78	31.34	51.75	91.79	65.48	91.05	41.94	88.33	50.52	89.57	45.04	86.27	45.04	87.37	50.21	87.19	53.44	90.57	57.42	80.65	71.43	85.19	51.41	85.63	56.59	87.11	55.22	84.16	37.82	89.28	50.35
CDK10	HsaINT0032376	chr16:89694233-89694664	432	chr16:89694173-89694232=89694665-89694788:+	IR-S	24.14	76.41	31.68	83.4	34.23	82.62	20.51	67.05	25.93	80.76	37.39	90.15	31.13	80.88	34.25	51.65	77.93	53.01	83.42	55	79.87	34.83	68.87	32.67	70.05	38.53	78.39	48	77.04	53.15	80.44	27.15	53.03	38.38	65.1	37.08	72.34	21.82	52.98	25.52	64	36.11	68.47	27.27
CDK18	HsaINT0032500	chr1:205529097-205529323	227	chr1:205528999-205529096=205529324-205529429:+	IR-S	0	4.46	1.45	7.74	0	5.5	0.74	4.04	0	5.17	0	4.88	0	4.38	1.64	0	6.85	9.68	5.41	0	6.9	0	7.14	2.13	6.45	3.45	7.69	4.76	5.08	3.7	7.5	100	100	33.33	55.56	75	100	100	100	7.14	12	28.57	15.79	55.56
CDK19	HsaINT0032513	chr6:110746202-110815008	68807	chr6:110815009-110815209=110746126-110746201:-	IR-S	52.94	88.89	27.27	53.85	40	70.37	55.56	84	17.65	80	20	68.42	50	77.78	41.67	42.03	71.43	33.33	77.14	50.88	70.49	17.24	47.83	14.29	25	10	41.67	27.03	60.98	45	69.01	16.98	23.08	7.69	16.67	13.79	75	10.53	14.29	20.93	13.04	10.71	33.33	4.92
CDK20	HsaINT0032536	chr9:87969350-87970775	1426	chr9:87970776-87970897=87969194-87969349:-	IR-C	100	92	33.33	100	100	100	100	100	33.33	100	20	100	0	100	100	86.67	91.49	56.25	94.81	71.43	96.41	100	95.6	72.73	100	78.57	98.02	64.29	95.35	69.23	97.06	76.47	91.84	77.78	89.66	55.56	100	88.89	95.45	73.91	100	100	96.72	84.62
CDK2AP2	HsaINT0032544	chr11:67507690-67508000	311	chr11:67508001-67508631=67507592-67507689:-	IR-S	18.08	55.14	15.94	32.61	20.13	40.91	20.77	67.12	15.33	40.43	21.5	40.54	17.56	47.37	16.36	14.5	27.69	16.76	31.67	21.39	33.8	18.29	40.43	15.51	25.37	25.17	41.18	11.86	25.84	16.06	49.3	27.91	34.35	31.18	47.46	36.79	41.18	30.61	32.26	35.27	42.47	26.22	40.32	24.05
CDK3	HsaINT0032548	chr17:76001542-76001873	332	chr17:76001412-76001541=76001874-76001951:+	IR-S	36.59	58.74	41.38	67.47	47.37	70.9	40.43	72.16	51.72	73.64	30.43	58.04	41.51	64.74	68.75	40.43	40.51	46.67	54.05	36.23	62.46	62.26	57.28	55	63.93	23.46	34.62	40.91	46.67	22.5	32.95	32.5	58.05	57.65	58.23	25.81	49.24	34.58	53.85	48.57	64.23	26.79	42.11	24.71
CDK5RAP3	HsaINT0032633	chr17:47975654-47975868	215	chr17:47975514-47975653=47975869-47976013:+	IR-S	27.89	95.25	29.14	93.41	24.29	93.56	24.83	96.74	30.94	97.05	20.53	95.58	26.42	96.15	38.54	22.31	87.72	27.05	86.67	23.9	88.33	18.31	89.33	26.16	89.74	23.19	86.41	22.22	89.94	23.35	82.64	15.89	74.81	16.43	75.1	14.19	72.65	19.61	78.73	17.27	82.7	15.16	78.62	14.85
CDKL3	HsaINT0032710	chr5:134366545-134366976	432	chr5:134366977-134367074=134366359-134366544:-	IR-S	83.33	100	100	100	84.62	87.5	100	100	100	100	83.33	92	100	100	100	100	100	100	100	100	100	100	100	69.23	100	100	100	100	100	100	100	77.78	100	25	100	75	100	100	68.42	80	100	100	100	100
CELF1	HsaINT0033106	chr11:47477426-47478876	1451	chr11:47478877-47478940=47477297-47477425:-	IR-S	8.27	64.71	10.45	67.01	6.77	46.22	14.65	81.43	10.71	49.32	8.66	61.67	20.79	69.81	17.99	63.89	90.73	59.75	78.15	31.43	75.27	28.65	70.94	20.69	54.47	18.86	58.1	36.71	68.75	46.01	88.3	25.25	65.61	30.1	54	28.57	52.94	33.85	48	35	66.92	26.37	45.7	31.34
CELF5	HsaINT0033147	chr19:3293487-3296757	3271	chr19:3293319-3293486=3296758-3297075:+	IR-S	81.87	95.77	77.25	93.35	78.23	97.3	72.46	96.21	88.28	91.85	68.49	98.69	77.79	95.16	70.64	65.34	94.05	100	95.48	77.3	97.33	96.12	100	93.95	100	94.42	94.55	74.6	88.85	62.79	92.98	99.41	99.43	99.55	100	100	100	100	98.84	100	98.63	100	99.05	99.5
CELF5	HsaINT0033154	chr19:3284965-3285941	977	chr19:3284902-3284964=3285942-3286025:+	IR-S	5.88	31.58	20	15.62	0	9.33	15.38	27.78	11.11	6.67	6.67	24.14	9.68	20	0	64.71	66.67	27.27	50	77.78	38.46	25	29.41	77.78	55.56	10	18.18	60	14.29	23.53	33.33	1.05	13.51	1.07	9.09	1.51	5.58	1.65	16.43	0.75	6.03	0.31	9.86	1.64
CELSR1	HsaINT0033200	chr22:46363188-46363995	808	chr22:46363996-46364251=46360834-46363187:-	IR-S	56.25	53.19	67.86	51.85	47.17	53.97	88.24	66.99	51.52	59.18	68	67.12	76.19	63.64	52.94	57.52	72.65	54.84	67.26	41.94	58.44	33.33	50.18	47.67	49.8	44.85	53.69	50.78	61.51	44.89	67.78	25	52	66.67	0	66.67	66.67	40	54.55	20	100	100	20	50
CELSR2	HsaINT0033233	chr1:109273671-109274021	351	chr1:109273436-109273670=109274022-109275756:+	IR-S	100	100	100	100	90.48	100	100	100	100	100	87.5	100	90.48	100	100	81.35	94.51	76.87	92.8	74.57	93.94	72.57	91.22	76.86	92.11	70.51	88.39	84.62	95.55	79.57	93.04	14.52	31.83	11.25	33.98	15.89	28.6	14.37	34.6	10.49	28.79	13.6	35.31	18.12
CENPJ	HsaINT0033395	chr13:24885387-24885605	219	chr13:24885606-24885670=24885276-24885386:-	IR-S	10.53	37.61	11.63	70.49	9.43	36.94	9.52	29.33	14.89	58.7	14.29	35.63	7.14	50	13.16	13.79	42.47	29.41	48	21.74	43.82	23.08	35.71	41.67	53.57	33.33	30.67	21.95	28.77	25	31.15	29.03	54.39	25.71	37.78	20	25.93	16.67	31.03	20	58.14	37.5	56	27.27
CENPT	HsaINT0033465	chr16:67830549-67831215	667	chr16:67831216-67831358=67830390-67830548:-	IR-S	16.85	70.33	16.83	65.71	11.76	71.04	21.74	78.59	20.41	66.64	29.27	73.4	15.79	68.91	31.37	31.2	52.23	16.67	56.46	12.12	49.37	18.57	53.99	10.17	48.5	17.28	45.85	16.67	48.06	13.64	44.07	16.22	45.54	15.69	45.43	12.39	49.69	18.37	45.09	20	45.31	13.68	47.77	15.9
CENPT	HsaINT0033466	chr16:67830089-67830389	301	chr16:67830390-67830548=67829765-67830088:-	IR-S	48.28	99.47	32.23	98.82	33.33	98.96	43.82	98.46	26.58	99.32	33.33	98.02	37.21	98.79	60.75	52.14	95.74	53.04	96.74	42.7	97.2	48.86	97.31	57.52	95.82	53.42	96.86	63.08	97.6	60.51	96.08	57.58	94.46	58.38	95.8	54.51	94.59	56.44	94.64	49.13	93.69	41.28	95.18	56.02
CENPV	HsaINT0033480	chr17:16348686-16349930	1245	chr17:16349931-16350029=16348616-16348685:-	IR-S	15.57	65.06	24.36	58	16.59	59.51	18.4	53.45	21.44	71.1	18.64	56.76	17.45	67.88	11.89	10.08	29.19	12.68	31.35	12.76	34.38	11.57	40.8	13.74	30.78	12.81	34.01	12.16	28.61	9.75	22.24	25.91	37.84	25.76	38.78	24.9	30.58	21.97	36.43	18.67	41.06	22.05	46.97	21.9
CEP164	HsaINT0033620	chr11:117409029-117409617	589	chr11:117408890-117409028=117409618-117409965:+	IR-S	17.65	72.78	16.12	73.21	4.76	88.87	0	85.82	0	85.48	38.06	73.57	22.58	70.73	6.67	17	87.35	12.59	86.82	23.08	84.7	8.11	78.02	13.32	78.71	15.04	81.55	13.32	82.03	5.29	91.3	19.88	49.23	12	50.71	14.82	62.53	14.08	49.41	6.67	43.23	13.32	66.09	6.67
CEP250	HsaINT0033713	chr20:35493573-35494523	951	chr20:35493429-35493572=35494524-35494657:+	IR-S	18.18	75	13.79	51.35	13.51	39.13	8.11	55.56	15.38	70.73	12.5	61.29	30	50	12.28	14.67	50	18.03	58.73	16.36	51.88	26.98	65.38	27.27	73.91	18.07	65.62	18.03	61.19	12.64	42.86	21.74	45.95	21.84	60	13.11	46.88	25.42	45.45	27.54	50	17.78	52.46	13.27
CEP290	HsaINT0033749	chr12:88103012-88106674	3663	chr12:88106675-88106905=88102838-88103011:-	IR-C	0	0	0	20	42.86	23.81	11.11	33.33	25	15.79	20	50	11.11	7.69	9.09	33.33	23.81	23.08	60	47.83	50	25	100	27.27	17.65	3.7	40	14.29	45.45	26.32	52.94	20	23.08	5.26	50	21.43	20	0	53.85	66.67	14.29	0	50	0
CEP57	HsaINT0033836	chr11:95821979-95822498	520	chr11:95821871-95821978=95822499-95822576:+	IR-S	12.36	33.33	4.35	31.65	8.96	45.79	21.31	66.04	13.95	37.75	17.56	53.62	8.03	11.43	13.43	60	100	57.33	80.95	35.35	78.95	32.35	65.71	29.79	69.23	34.07	66.1	38.78	67.86	43.33	78.05	17.86	48.39	25.93	48.57	22.03	23.53	20.75	72.73	22.58	66.67	33.33	33.33	10.64
CEP57	HsaINT0033837	chr11:95822577-95827785	5209	chr11:95822499-95822576=95827786-95828027:+	IR-C	8.07	60	7.98	42.73	10.42	55.31	13.36	73.77	13.55	59.01	17.39	65.17	16.31	70	17.2	65.47	84.67	68.21	92.5	32.97	84.26	39.05	76.47	33.85	66.33	28.49	74.7	37.7	79.38	54.72	88.85	25.58	54.84	14.53	54.46	27.66	50	22.69	52.58	17.07	54.95	24.14	55.79	20
CEP68	HsaINT0033875	chr2:65074405-65077867	3463	chr2:65074282-65074404=65077868-65077964:+	IR-C	10.71	84.62	5.66	65.22	16.67	58.82	25.42	52.94	44.44	50	22.22	60	22.22	63.64	27.27	33.33	63.64	10.77	45.45	23.29	17.65	9.52	47.83	17.02	23.08	11.63	38.46	6.02	52	22.03	57.58	11.76	17.24	15.62	42.86	27.66	39.13	16.92	29.73	19.35	52.94	23.81	42.86	14.67
CEP70	HsaINT0033885	chr3:138498111-138500109	1999	chr3:138500110-138500224=138498031-138498110:-	IR-C	9.43	26.32	23.08	47.06	9.09	30	9.38	33.33	19.15	21.57	9.09	12.82	5.66	11.48	8.77	30.43	59.38	24.64	58.62	17.89	47.06	28.57	63.64	15.38	41.18	25.93	41.18	14.85	41.38	29.27	52.17	28.57	0	21.74	20	23.81	75	18.18	45.45	14.29	33.33	13.04	50	20
CEP70	HsaINT0033886	chr3:138495077-138498030	2954	chr3:138498031-138498110=138494345-138495076:-	IR-S	11.11	34.69	16.67	35.48	6.67	42.86	3.7	62.26	17.65	35.14	15.79	55.56	3.03	33.33	16.67	40.54	78.72	43.75	61.11	29.63	79.31	26.67	61.54	31.25	52.38	16.98	76.47	48.15	80	26.92	85.29	0	69.23	40	60	20	42.86	28.57	100	60	55.56	33.33	55.56	28.57
CEP72	HsaINT0033905	chr5:640605-644298	3694	chr5:640408-640604=644299-644425:+	IR-S	41.18	48.72	31.71	48.39	44.83	76.47	23.08	91.3	41.18	48.94	18.75	62.79	20.93	57.14	35.48	25.93	100	65	78.72	41.18	63.33	46.67	91.67	61.11	60	33.33	72.09	52.38	85.19	68.18	68.75	20	0	42.86	33.33	33.33	60	63.64	100	73.33	45.45	27.27	54.55	20
CEP78	HsaINT0033918	chr9:78253278-78254835	1558	chr9:78253232-78253277=78254836-78254964:+	IR-S	0	17.65	3.45	10	2.5	16.67	0	13.73	11.11	18.52	9.52	17.95	9.09	17.95	15.15	15.46	61.76	29.41	37.5	8.82	35.42	4.55	21.74	20.63	37.14	10.45	36	15.94	40.62	25.71	37.35	7.69	25	12.5	11.11	2.44	27.27	16.67	33.33	0	10	0	14.29	7.69
CEP78	HsaINT0033931	chr9:78252044-78253231	1188	chr9:78251905-78252043=78253232-78253277:+	IR-S	3.9	68	15.38	75.86	13.95	72.73	23.29	81.82	29.73	60.56	19.4	68.29	29.58	77.36	27.03	35	61.29	36.94	78.26	30	75	18.75	72.73	32.39	63.33	24.39	58.33	32.8	69.01	29.11	74.71	8.33	62.5	7.41	29.41	22.22	50	5.88	33.33	21.74	44.83	9.09	71.43	11.76
CEPT1	HsaINT0033948	chr1:111174964-111182186	7223	chr1:111174879-111174963=111182187-111182318:+	IR-S	6.9	68	9.09	47.83	2.22	29.73	4.35	66.67	10.2	80	11.11	60	16	70	12.9	26.09	20	15.25	29.41	14.29	21.74	18.75	30	15.56	50	20.75	42.86	13.33	33.33	9.68	23.81	17.95	30	12.5	28.57	27.27	25	16.13	50	0	11.11	30	23.08	7.14
CERCAM	HsaINT0033953	chr9:128421075-128422867	1793	chr9:128420480-128421074=128422868-128422978:+	IR-S	40	63.64	14.29	78.38	50	63.64	33.33	100	14.29	61.9	50	100	20	100	23.08	55	88.8	43.94	95.53	47.52	96.39	36.89	96.23	36.77	92.1	39.76	90.97	54.55	90.21	39.22	87.08	23.91	65.33	39.62	74.71	34.43	76.24	18	80.53	35.29	68.18	40.74	75.28	11.36
CFLAR	HsaINT0034195	chr2:201160943-201163834	2892	chr2:201160432-201160942=201163835-201164118:+	IR-S	15.79	100	20	50	16.67	33.33	11.11	50	0	36.84	14.29	27.27	11.11	66.67	20	6.25	78.95	17.65	36	9.09	14.29	16.13	25	38.46	20	12.82	40	6.67	33.33	37.5	14.29	18.18	11.11	10.34	33.33	23.81	33.33	0	0	20	16.67	9.09	41.18	10.53
CGGBP1	HsaINT0034251	chr3:88057293-88058018	726	chr3:88058019-88058223=88057191-88057292:-	IR-C	16.13	57.14	21.43	42.86	30.43	68.42	21.31	68	14.75	64.29	20	63.64	36.36	60	22.81	40	66.67	41.18	100	52	60	29.03	80	42.37	61.9	20.83	60	46.67	52.38	30	100	45.45	66.67	33.33	50	71.43	50	45.45	66.67	10.53	40	46.67	78.95	33.33
CHD2	HsaINT0034453	chr15:92900825-92901166	342	chr15:92900321-92900824=92901167-92901299:+	IR-S	11.11	41.67	24.32	22.45	8.11	30.77	15.56	16.98	15.38	21.05	17.24	4.55	16.92	60	5.49	42.62	59.32	30.56	47.62	49.02	47.54	41.46	50	39.53	33.33	47.66	54.29	52.73	61.29	36.28	42.86	61.19	82.61	73.17	88.24	45.68	78.38	67.27	71.43	69.23	78.38	82.35	83.78	71.83
CHD2	HsaINT0034456	chr15:92901300-92924320	23021	chr15:92901167-92901299=92924321-92924552:+	IR-C	21.91	50.09	14.89	39.13	17.86	24.32	20.04	50.18	8.82	33.37	17.78	27.59	19.34	42.15	16.91	45.88	77.27	31.34	41.33	34.67	24.16	35.14	26.09	32.43	36.08	29.31	15.62	33.35	46.67	36.13	69.86	42.86	50.03	39.7	71.43	28.57	34.88	22.47	57.89	34.07	54.29	28.09	54.58	32.73
CHD3	HsaINT0034519	chr17:7909339-7910427	1089	chr17:7909143-7909338=7910428-7910591:+	IR-C	28.57	71.11	14.2	66.4	30	66.26	23.53	71.43	22.86	59.46	47.37	91.67	26.4	61.54	27.27	36.89	69.54	28.08	79.22	28.57	68.93	24.34	68.5	30.2	59.05	38.25	76.71	38.27	69	30.51	70.11	18.76	46.48	15.68	44.22	18.47	42.08	18.64	52.08	19.81	50.98	18.28	54.73	19.63
CHD6	HsaINT0034637	chr20:41413516-41415185	1670	chr20:41415186-41415638=41413324-41413515:-	IR-C	14.29	34.88	11.11	25.88	16.85	34.67	12.09	50.38	7.25	45.25	16.88	37.5	13.21	41.18	13.73	37.14	52.69	43.59	58.62	36	44.49	13.04	40.79	14.02	44.58	12.87	33.33	35.21	52.11	27.78	57.3	7.79	15.94	9.41	18.18	6.33	17.46	4.76	22.33	8.33	13.04	7.94	23.27	6.06
CHD8	HsaINT0034719	chr14:21431859-21437193	5335	chr14:21437194-21437298=21431811-21431858:-	IR-S	20	33.33	75	55.56	33.33	80	60	100	15.79	50	60	100	0	100	42.86	33.33	75	28	50	11.11	38.46	28.57	66.67	11.11	33.33	40	42.86	14.29	27.27	37.93	100	22.73	0	38.46	57.14	13.04	28	21.21	45.45	15.38	7.69	15.15	28.57	22.22
CHD9	HsaINT0034751	chr16:53318341-53321525	3185	chr16:53318212-53318340=53321526-53321630:+	IR-S	12	55.56	5.88	9.09	27.27	51.11	14.29	68.75	22.22	42.86	46.67	100	17.24	36.84	13.51	20.83	44	25.49	36.84	12.5	37.78	20.93	66.67	16.67	25	28.3	50	14.29	45.45	31.71	36.59	7.87	18.37	9.38	14.29	18.37	23.81	21.43	25	10	33.33	19.3	26.32	13.89
CHKB	HsaINT0034921	chr22:50582358-50582557	200	chr22:50582558-50582999=50582249-50582357:-	IR-C	23.4	87.38	21.5	87.57	23.08	84.66	28.09	84.95	37.39	80.13	38.46	88.41	34.94	82.75	40	32.79	86	41.86	90.82	41.1	87.41	56.59	88.38	53.98	85.09	50.59	89.24	45.45	84.3	36.28	84.51	77.46	88.89	78.62	92.25	61.8	86.88	63.84	91.49	66.91	88.85	67.38	88.6	57.53
CHKB	HsaINT0034923	chr22:50581863-50582248	386	chr22:50582249-50582357=50581749-50581862:-	IR-C	44.72	93.36	41.99	94.28	31.84	92.81	36.26	92.16	30.59	95.07	43.28	95.37	55.33	94.84	48.69	58.9	90.46	36.61	88.22	47.43	89.55	67.93	90.76	60.92	85.4	68.01	86.48	63.48	90.75	42.64	85.53	59.75	79.99	66.29	81.31	66.68	84.53	61.54	84.11	57.55	85.28	66.69	84.29	48.26
CHKB	HsaINT0034924	chr22:50581554-50581748	195	chr22:50581749-50581862=50581420-50581553:-	IR-C	6.49	39.55	11.83	42.19	8.24	40.7	9.47	37.94	10	44.42	6.42	42.03	6.31	38.66	8.26	14.49	52.04	19.27	63.11	13.79	55.32	18.7	53.17	26.32	50.08	18.18	47.27	17.24	58.44	16.28	57.76	24.09	56.92	31.15	60	16.55	55.51	23.53	59.61	25.22	55.88	18.52	62.36	33.33
CHKB	HsaINT0034927	chr22:50580272-50580357	86	chr22:50580358-50580416=50580190-50580271:-	IR-C	16.36	28.43	12.94	23.02	16.05	30.15	11.76	24.05	7.14	30.03	23.08	25.05	8.05	27.59	4.62	13.51	40.98	25.33	38.02	26.03	33.14	27.91	52.33	29.41	40.07	20.55	35.98	22.39	31.51	20	35.15	59.26	52.05	33.33	48.07	31.58	48.39	36.71	49.23	50	56.23	43.33	51.79	41.46
CHMP4A	HsaINT0034993	chr14:24211830-24213408	1579	chr14:24213409-24213979=24211680-24211829:-	IR-C	6.22	68.42	4.8	50.68	8.06	39.62	8.07	68.29	11.11	64.41	7.63	65.22	7.59	68.7	6.57	13.57	43.45	12.04	52.24	12.89	51.31	12.64	69.6	15.38	52.26	9.7	61.78	8.2	48.1	11.94	45.76	16.74	43.33	24.61	42.48	14.4	39.74	17.6	47.3	19.07	47.03	21.59	53.09	13.59
CHN2	HsaINT0035048	chr7:29509407-29512563	3157	chr7:29509301-29509406=29512564-29514328:+	IR-S	0	33.33	0	100	100	55.56	0	53.85	50	45.45	33.33	66.67	14.29	100	0	40	50	14.29	50	14.29	100	5.88	11.11	25	42.86	20	16.67	42.86	50	20	100	7.69	0	2.26	8.33	4	11.11	0	9.09	2.29	4.92	1.54	12.2	4
CHPF2	HsaINT0035087	chr7:151235613-151236407	795	chr7:151235048-151235612=151236408-151236590:+	IR-S	18.52	51.61	35.29	60	33.33	50.39	22.03	52.54	36.84	66.36	23.33	60.29	25.33	39.13	25.93	12.5	17.65	51.52	56.25	36.84	55.56	48.72	64.18	54.55	48.72	60	63.89	44	36.36	23.08	28.57	48.67	55.93	51.02	55.1	55.26	54.05	52.21	77.78	61.11	57.89	40.59	66.94	42
CHPF2	HsaINT0035088	chr7:151236591-151237373	783	chr7:151236408-151236590=151237374-151238819:+	IR-S	25.37	72.73	44.83	79.63	34.78	86.81	24.59	75.61	47.17	78.22	29.41	92.86	25	88.64	19.15	42.86	65.22	52.63	63.64	36.17	69.86	52.94	86.21	47.62	66.67	38.98	79.31	13.64	66.67	44	33.33	51.52	61.62	58.97	68.81	69.23	76.81	48.51	64.71	55	73.91	59.55	70.09	42.86
CHRNA3	HsaINT0035185	chr15:78617134-78618616	1483	chr15:78618617-78618661=78617024-78617133:-	IR-S	20	100	0	55.56	0	25	0	60	4.76	36	0	64.71	7.69	0	0	29.41	63.64	35.29	61.48	7.48	36.17	13.13	39.68	4.35	29.07	14.92	38.91	18.64	50.88	37.4	70.49	7.34	29.58	5.26	40	0	12.2	6.49	36	0	23.08	5.66	38.46	12.62
CHRNB1	HsaINT0035219	chr17:7447152-7447502	351	chr17:7447043-7447151=7447503-7447650:+	IR-S	14.49	80.35	22.94	87.46	15.63	68.21	7.84	82.44	30.23	90.97	15.89	95.13	10.8	90.54	4.81	32.37	80.77	41.42	49.46	0	75.99	0	78.92	9.09	86.87	48.91	41.42	4.37	53.08	7.14	36.21	0	54.25	0	32.69	8.38	35.68	31.37	32.37	10.26	33.33	0	54.69	5.26
CHRNB1	HsaINT0035223	chr17:7455457-7455793	337	chr17:7455284-7455456=7455794-7455941:+	IR-C	12.94	46.88	33.33	64.91	32.47	62.22	25.81	67.11	33.33	66.67	20	65.71	32.5	51.52	31.91	71.43	85.71	64.71	70.37	52	75.51	44.44	68	55.56	66.67	63.64	76	53.49	73.33	70.37	75	91.3	80.33	100	90.91	84.5	83.72	90.08	94.44	96.08	70.37	94.2	100	72.04
CHTF18	HsaINT0035332	chr16:790667-791160	494	chr16:790525-790666=791161-791370:+	IR-S	24.14	92.24	28.24	88.55	24.44	83.71	26.92	95.99	27.73	89.88	25	92.6	38.61	91.69	39.85	47.11	92.59	50	94.37	40.32	85.99	35.48	91	37.39	87.91	32.67	90.13	42.66	94.28	53.16	94.46	33.33	84.62	28.57	79.75	26.67	82.5	47.37	75	31.43	77.55	20	75.85	14.29
CHTF18	HsaINT0035333	chr16:791371-791850	480	chr16:791161-791370=791851-791948:+	IR-S	8.47	86.18	20.59	90.61	14.29	91.58	23.33	91.91	19.15	84.54	17.46	90.89	24.27	85.77	33.33	31.58	85.76	33.91	87.74	31.09	87.63	29.41	84.52	31.58	81.56	31.37	83.24	23.08	85.01	33.88	83.45	52.38	75.84	40	84.62	29.41	85.71	29.03	89.36	29.41	79.1	25	82.35	25
CHTF18	HsaINT0035334	chr16:791949-792223	275	chr16:791851-791948=792224-792347:+	IR-S	7.14	78.04	8.82	82.16	9.09	84.79	10	81.63	12.06	79.3	19.67	82.39	21.9	77.4	18.99	28.34	79.18	32.93	85.51	25.76	84.11	13.91	78.85	21.05	78.03	31.88	81.29	27.17	80.28	28.89	78.85	27.78	73.94	43.75	75.6	24.32	78.06	40	77.4	22.22	79.47	34.88	74.57	11.11
CHUK	HsaINT0035352	chr10:100189628-100190868	1241	chr10:100190869-100190968=100188367-100189627:-	IR-S	3.33	51.9	4.92	21.21	3.53	27.27	6.45	45.45	5.08	28.57	1.89	37.14	7.37	50	3.45	8.7	22.73	9.09	14.29	14.81	19.4	12.82	29.41	7.14	34.78	12.82	31.03	12.82	29.17	4	17.95	35	50	11.86	29.03	19.3	39.39	15.25	30.91	26.83	26.47	18.64	53.12	14.29
CIAO1	HsaINT0035367	chr2:96268659-96269267	609	chr2:96268457-96268658=96269268-96269355:+	IR-S	13.98	70.77	17	70.2	11.11	71.3	16.24	76.88	10.94	66.02	17.61	71.57	12.11	74.51	12.7	27.5	60.47	23.68	72.44	29.3	70.37	29.97	72.65	27.27	59.68	26.04	66.96	23.78	64.95	24.79	59.84	22.96	46.36	29.89	50.79	19.91	47.26	20.19	54.23	30.7	52.68	26.43	65	18.97
CIC	HsaINT0035399	chr19:42284772-42286770	1999	chr19:42284665-42284771=42286771-42286920:+	IR-S	4.35	56.6	8	48.5	8.33	55.26	12.82	57.89	9.43	63.51	24.14	55.04	16.13	57.14	19.35	5.45	38.71	8.24	34.13	4.41	39.05	12.07	43.07	17.39	41.82	5.45	38.32	10.26	57.23	4.35	41.18	12.55	32.74	13.11	30.75	7.83	28.28	17.18	32.71	8.46	35.55	10.77	33.7	6.4
CIRBP	HsaINT0035487	chr19:1272052-1272426	375	chr19:1271981-1272051=1272427-1273172:+	IR-S	14.46	85.83	19.15	81.17	17.3	84.93	17.47	88.21	20.69	86.16	21.28	84.84	17.13	84.94	18.69	15.87	55.21	14.98	51.4	14.69	65.94	14.68	75.81	15.63	59.11	15.48	65.88	15.4	62.49	15.4	47.13	23.45	54.22	21.2	49.14	25.73	56.01	26.05	57.86	19.54	52.03	23.24	59.46	19.65
CIRBP	HsaINT0035490	chr19:1274441-1274648	208	chr19:1271981-1274440=1274649-1274810:+	IR-S	54.57	56.73	29.61	59.66	35.92	55.95	34.33	55.17	54.84	67.89	47.53	64.55	28.93	61.71	35.79	43.95	53.43	30.63	53.1	40.9	55.9	52.36	60.98	41.26	57.91	31.97	55.59	42.01	55.32	36.05	49.06	22.86	35.9	25.01	32.98	28.35	42.93	22.47	42.18	23.08	42	23.19	39.92	29.89
CLASRP	HsaINT0035790	chr19:45068055-45068419	365	chr19:45068015-45068054=45068420-45068480:+	IR-S	1.66	96.1	5.16	91.86	35.28	93.44	9.18	94.54	7.28	95.81	43.38	97.4	29.79	96.28	10.54	12.55	97.61	38.45	97.33	14.55	96.15	25.93	96.14	42.31	94.43	15.02	94.06	36.13	96.9	29.72	94.73	26.61	95.98	23.37	93.97	41.42	91.8	16.42	94.13	64.43	94.14	32.53	93.53	7.01
CLCN2	HsaINT0035899	chr3:184354974-184355373	400	chr3:184355374-184355529=184354904-184354973:-	IR-C	0	23.08	4.35	29.41	4.35	31.18	2.44	24.32	6.67	20.48	0	41.03	0	12.68	0	16.67	80	45.45	69.52	25	62.87	12.5	43.14	22.22	53.72	10	55	42.86	70.83	14.29	66.15	30.43	53.4	23.53	47.88	25	52.6	14.29	63.41	15.38	60	11.63	52.1	12.5
CLCN6	HsaINT0035963	chr1:11829323-11833514	4192	chr1:11829196-11829322=11833515-11833638:+	IR-S	12.5	61.29	16.13	79.71	22.22	67.57	16.67	73.53	24.32	65.05	28.57	68.29	27.27	61.11	24.44	32	88.24	56.76	82.61	23.53	73.91	23.94	58.02	27.27	38.89	17.81	58.97	31.25	60	50	89.9	14.61	40.85	18.84	28.12	21.9	44.19	8.43	29.67	5.26	35.9	21.13	36.84	17.24
CLCN7	HsaINT0035991	chr16:1451717-1452754	1038	chr16:1452755-1452893=1451623-1451716:-	IR-S	1.08	83.53	9.09	84.96	2.29	83.55	9.68	91.39	1.15	86.6	4.76	82.84	6.19	84.03	4.35	21.95	85.5	22.58	88.93	9.68	83.17	7.32	71.7	9.09	74.77	6.25	77.56	10.71	81.97	12.5	85.86	3.45	34.21	6.8	58.62	3.9	69.14	0.93	48.35	4.67	57.26	4.59	58.09	1.03
CLDN15	HsaINT0036066	chr7:101237825-101237937	113	chr7:101237938-101238820=101237365-101237824:-	IR-S	0	66.04	28.57	94.74	64.71	68.25	31.03	88.89	44.44	83.78	36.36	84.91	25	83.33	33.33	33.33	92.31	46.67	95.12	69.23	95.92	64.29	82.61	47.06	72.34	52.94	82.22	47.37	90.91	57.89	87.5	84	94.44	57.89	79.49	60	90	75.76	83.87	65.52	75.34	66.67	75	50
CLDN15	HsaINT0036067	chr7:101234443-101237364	2922	chr7:101237365-101237824=101234278-101234442:-	IR-S	40	54.72	14.29	61.29	16.67	52.38	0	64.18	36.36	62.5	20	58.06	50	62.26	24.14	46.67	56.16	30.77	56.76	80	63.06	37.5	34.85	57.14	39.13	25.58	44.76	50	55.36	33.33	57.45	23.53	44.26	13.51	22.22	21.21	23.53	19.3	33.33	65.22	31.43	33.33	24.21	21.05
CLDN15	HsaINT0036068	chr7:101232915-101234277	1363	chr7:101234278-101234442=101232833-101232914:-	IR-C	46.97	61.43	72	68.57	40.43	61.2	49.09	74.13	49.09	71.79	19.85	71.23	36.84	90.85	43.24	61.82	64.51	25.93	79.81	31.47	78.48	78.29	81.47	57.25	74.91	60.64	78.12	62.42	91.6	38.05	73.83	41.42	58.39	32.46	61.11	60.45	60.84	52.22	53.85	22.22	46.45	42.86	53.61	30.99
CLEC11A	HsaINT0036107	chr19:50723673-50723904	232	chr19:50723348-50723672=50723905-50724091:+	IR-S	15.79	100	0	66.67	20	92	7.14	72.73	25	53.85	20	100	14.29	73.91	21.05	26.32	33.33	100	100	53.85	66.67	11.11	45.45	66.67	100	0	20	37.5	57.14	25.71	38.46	86.67	100	60	85.71	62.5	69.23	41.18	100	69.23	78.95	45.45	78.57	21.43
CLEC16A	HsaINT0036134	chr16:11166553-11178334	11782	chr16:11166388-11166552=11178335-11182189:+	IR-S	0	75.97	0	30.16	20.48	65.19	27.67	56.44	45	77.28	53.6	100	33.78	100	70.07	39.45	79.79	33.53	64.52	20	51.08	18.23	63.87	12.83	56.72	10.9	42.68	25.94	56.72	60.95	50.75	8.24	30.65	23.79	41.42	17.5	44.21	6.52	26.54	12.12	31.04	12.56	27.69	5.79
CLINT1	HsaINT0036338	chr5:157789568-157791702	2135	chr5:157791703-157791995=157789363-157789567:-	IR-C	12.98	84	10.89	68.42	20.31	62.35	13.64	66.29	12.9	81.61	13.48	77.78	20	84.62	18.25	6.93	19.15	12.5	27.66	14.85	72.31	19.3	47.37	21.05	32.14	19.63	26.09	8.96	40.54	10.81	26.09	11.63	30	8.2	52	18.75	23.53	27.27	55.56	23.08	31.25	5.13	39.13	13.51
CLK1	HsaINT0036418	chr2:200861863-200864100	2238	chr2:200864101-200864561=200861702-200861862:-	IR-C	0	33.33	100	33.33	0	50	42.86	63.64	0	29.41	100	41.18	0	66.67	40	55.56	60	56.52	58.62	44.44	68.97	36.36	73.91	28.57	50	33.33	71.43	45.45	42.86	56.76	87.23	20	100	64.71	46.67	53.85	88.89	26.67	82.61	33.33	7.69	41.18	55.56	39.13
CLK1	HsaINT0036423	chr2:200860216-200861237	1022	chr2:200861238-200861466=200860125-200860215:-	IR-C	74.19	98.35	80	98.73	72.55	96.04	77.14	96.19	74.6	97.53	81.82	96.58	76.67	98.47	82.14	37.7	62.09	40.84	69.6	52.19	82.47	52	75.2	61.58	85.8	48.57	76.57	47.26	76.15	38.92	64.79	60.42	86.98	62.03	72.91	64.12	80.55	60.27	86	58.46	88.03	57.85	89.63	57.72
CLK1	HsaINT0036424	chr2:200859747-200860124	378	chr2:200860125-200860215=200859680-200859746:-	IR-C	75	98.75	71.43	98.13	60	97.69	80.39	95.97	94.87	95.98	84	100	75.51	92.94	95.35	33.75	43.01	40.2	61.95	41.12	75	27.2	68.38	39.89	83.71	47.49	67.36	54.87	60.87	25.37	48.05	42.59	76.06	51.26	75.97	44.57	74.49	44.14	72.46	49.71	77.69	47.67	75.9	44.39
CLK2	HsaINT0036437	chr1:155268793-155269487	695	chr1:155269488-155269716=155268708-155268792:-	IR-S	10.2	92.62	35.02	90.67	6.85	91.63	7.14	91.74	35.97	95.76	16.67	92.57	4	92.65	47.57	25.25	88.2	8	72.41	20	88.58	34.73	89.75	43.57	88.74	33.97	89.89	17.86	85.29	6.25	84.65	37.93	92.59	73.57	93.88	55.1	90.86	64.83	95.5	52.1	95.05	61.87	93.58	40.72
CLK4	HsaINT0036462	chr5:178617435-178618555	1121	chr5:178618556-178618778=178617344-178617434:-	IR-S	62.5	93.1	50	80	57.89	75.61	60	86.05	11.63	88.73	30.77	81.25	35.48	77.78	80	13.04	27.27	10.77	23.53	51.11	52.78	56.1	48	25.93	77.27	18.52	48	38.46	55	16.67	11.54	54.39	77.78	45.95	84.31	60	78.18	54.84	76.12	65.71	69.49	70	74.6	55.56
CLK4	HsaINT0036463	chr5:178616949-178617343	395	chr5:178617344-178617434=178616882-178616948:-	IR-C	80	100	36.36	80	68	88	48.57	71.43	45.45	81.4	39.13	93.33	88.24	82.61	61.54	6.06	7.14	15	10.34	39.53	38.71	26.92	34.69	42.86	69.23	38.98	44.44	26.47	61.29	12.5	14.81	53.33	83.1	50	68.25	28.57	66.67	48.94	66.04	52.38	72.55	61.54	85.71	72.97
CLN3	HsaINT0036498	chr16:28491836-28492019	184	chr16:28492020-28492302=28491714-28491835:-	IR-S	41.82	37.93	62.5	66.67	58.21	45.1	46.27	44.19	62.26	29.03	46.48	39.39	44.68	29.73	45.21	58.33	31.43	67.74	30.43	51.35	38.67	59.18	47.22	51.35	55.1	62.5	41.18	41.18	38.46	31.43	28.3	72.6	60.56	65.85	52.38	66.67	63.93	69.39	57.3	57.14	38.03	63.08	39.39	50.72
CLN5	HsaINT0036501	chr13:76996128-77000457	4330	chr13:76995902-76996127=77000458-77002517:+	IR-S	21.74	72.73	0	45.45	15.15	66.67	17.65	77.78	0	30.43	9.68	72.73	14.29	92.59	8.33	17.39	40.54	20	47.83	33.33	46.67	13.04	75	16.67	60	7.14	42.86	13.64	52.94	25.37	42.22	5.26	26.32	0	47.37	9.09	38.46	9.09	66.67	0	15.38	4.76	17.65	5.88
CLN6	HsaINT0036505	chr15:68211319-68211674	356	chr15:68211675-68211863=68211263-68211318:-	IR-S	7.32	70.67	6.33	53.19	12.14	69.23	5.32	61.17	9.73	60.75	11.25	67.92	8.33	62.26	21.68	15.52	59.04	17.78	66.67	14.47	53.44	15.97	58.9	12.68	51.68	12.99	50.85	19.3	59.66	11.11	63.41	19.23	64.29	37.14	64.71	27.78	86.67	24.59	45.95	7.25	80	23.08	52.17	20.83
CLSTN1	HsaINT0036663	chr1:9737555-9741093	3539	chr1:9741094-9741256=9737498-9737554:-	IR-S	9.76	85.71	9.59	84.24	12.24	79.43	30.61	90.43	25	76.72	26.53	95.28	32.2	69.57	30.77	45.83	89.94	33.33	91.26	20.79	86.29	21.21	86.96	20	60.78	23.08	80	34.94	89.15	40.59	82.94	2.16	6.78	3.9	16.5	2.64	10.32	3.61	12.36	4.21	10.79	3.68	14.29	3.43
CLSTN1	HsaINT0036664	chr1:9736043-9737497	1455	chr1:9737498-9737554=9735885-9736042:-	IR-S	17.95	87.65	25.27	75	10.11	81.22	18.68	88.98	25	75.57	29.51	89.26	28.21	81.25	31.37	45.21	94.19	30.84	90.33	26.13	91.33	11.86	78.26	15.43	60.67	18.95	66.99	29.29	80.95	38.46	85.48	0.19	3.92	3.34	9	0.6	5.91	1.05	5.47	1.3	7	1.06	9.13	1.38
CLTCL1	HsaINT0036782	chr22:19187729-19187980	252	chr22:19187981-19188091=19187558-19187728:-	IR-C	0	38.89	10	50	14.29	37.93	25	46.34	0	41.38	15.79	65.52	9.09	39.13	21.43	6.67	50	25	68.42	50	75	14.29	75	0	87.5	20	66.67	25	55.56	29.41	66.67	33.33	92	28.57	57.14	45.45	39.13	14.29	89.47	6.67	38.46	42.86	68.42	14.29
CLTCL1	HsaINT0036783	chr22:19183612-19187557	3945	chr22:19187558-19187728=19183390-19183611:-	IR-C	14.81	41.33	25	47.06	5	65.52	11.11	51.81	11.11	44.26	21.05	68	11.63	50	3.85	50	61.9	100	84	33.33	70.37	33.33	82.61	57.14	65.71	42.86	90	18.52	51.35	15.79	61.29	64.71	69.7	27.27	71.43	73.33	43.75	73.33	71.43	23.08	52.94	42.86	72.22	25
CLTCL1	HsaINT0036785	chr22:19180807-19183389	2583	chr22:19183390-19183611=19180731-19180806:-	IR-S	3.03	66.36	28.57	49.37	2.56	57.89	4.76	50.77	4	57.14	14.29	66.67	12.28	47.97	13.04	21.74	52.94	15.79	48.84	30.43	55.56	57.14	52	10	68.42	30	53.49	18.52	54.72	42.86	40	15.15	35.06	14.29	24	19.05	55	5.88	48.15	9.09	38.03	13.33	50	14.29
CNNM3	HsaINT0037180	chr2:96825202-96826832	1631	chr2:96825058-96825201=96826833-96826982:+	IR-C	0	10.34	0	11.54	1.03	14.29	0	12.2	0	10.71	0	3.12	2.44	31.91	1.3	1.12	8.64	2.08	15.09	1.59	22.81	1.89	38.46	1.49	18.52	7.69	34.04	1.3	27.78	1.96	8.33	13.04	58.62	18.31	61.76	33.33	60.53	6.67	74.36	22.45	52.38	21.95	63.16	18.75
CNNM3	HsaINT0037185	chr2:96829135-96832551	3417	chr2:96828996-96829134=96832552-96835384:+	IR-S	7.25	48.78	6.02	55.77	6.12	51.11	8.57	50.68	8.7	50	4.42	71.43	9.91	45.24	7.69	16.67	57.8	12.12	65.57	20.55	66.67	21.21	61.45	15.29	59.6	15.38	43.59	13.51	49.61	12.77	47.54	22.73	66.67	45.95	51.22	30	59.09	40	80	43.4	65.96	51.22	74.07	40.91
CNNM4	HsaINT0037191	chr2:96799649-96808560	8912	chr2:96799552-96799648=96808561-96808742:+	IR-S	14.29	78.95	8.2	9.09	8.24	50	12.28	50	4.76	16.67	12	20	8.47	50	8.82	22.67	40.91	22.58	57.58	24.14	27.78	26.32	50	21.21	26.32	16.67	21.74	14.29	38.1	18.99	43.59	18.31	25.49	14.29	18.52	20.69	13.21	11.39	25.71	9.3	33.33	11.11	34.69	17.89
CNOT3	HsaINT0037281	chr19:54153841-54155308	1469	chr19:54153715-54153840=54155309-54155708:+	IR-S	6.07	67.42	6.19	65.03	8.23	68.65	6.84	77.63	5.26	65.06	7.74	71.2	6.59	69.6	12	26.55	71.78	21.9	68.75	17.59	63.54	14.39	59.32	12.09	59.15	17.05	57.76	14.95	66.67	21.95	72.04	11.11	50.2	20.21	43.17	18.92	47.96	20.89	51.6	16	49.21	12.32	46.79	16.49
CNPY4	HsaINT0037350	chr7:100119863-100122258	2396	chr7:100119642-100119862=100122259-100122385:+	IR-S	8.41	70.37	20.51	62.96	20.9	81.48	31.43	59.18	17.39	58.82	15.38	46.67	18.75	54.84	24.75	18.6	24	14.06	34.09	22.22	55.91	28.17	57.38	17.14	35.48	13.18	47.5	11.71	45.45	14.29	39.62	49.23	45.45	40.91	49.06	58.87	59.69	47.67	49.59	32.11	64.84	32.87	54.41	37.33
CNTNAP1	HsaINT0037570	chr17:42687047-42687719	673	chr17:42686903-42687046=42687720-42687981:+	IR-S	8.33	75.61	11.11	75	14.29	81.08	21.43	89.09	38.46	72.63	37.14	100	28.57	89.47	28.89	45.63	86.61	31.71	86.67	26.67	81.19	29.73	90.34	77.78	86.52	20.93	75.28	35.38	80.23	23.08	68.8	29.67	60.8	38	72.57	30.81	63.02	37.4	62.33	26	65.46	21.82	69.54	18.75
COCH	HsaINT0037729	chr14:30874592-30874915	324	chr14:30874535-30874591=30874916-30874972:+	IR-S	48.72	75	46.34	76.32	63.16	71.43	52.94	85.19	58.62	70	57.89	83.33	35.29	75	71.43	91.49	95	90.24	94.59	87.1	79.31	69.81	90	79.49	86.67	55.56	75	52.63	82.86	61.11	76.19	71.08	68.89	81.4	81.13	85.96	89.66	93.62	88	92.16	77.53	64.21	90.24	79.8
COCH	HsaINT0037733	chr14:30875104-30877571	2468	chr14:30875056-30875103=30877572-30877728:+	IR-S	5.88	69.23	10.64	46.94	10	48.72	20	81.82	8.33	56.52	11.11	73.91	13.04	53.85	12.5	31.25	40.74	35	45.45	13.33	62.96	28.57	80	17.65	60	14.29	34.88	26.83	57.58	29.03	66.67	11.11	11.76	3.45	4	4.76	25	18.92	15.15	11.11	10	2.22	13.51	2.78
COCH	HsaINT0037739	chr14:30884657-30885393	737	chr14:30884553-30884656=30885394-30885620:+	IR-S	5.88	76.67	8.7	57.14	21.05	60.61	22.22	78.57	7.14	63.64	4.55	67.74	7.41	72.22	16.67	29.03	75.51	31.43	90	24.44	63.86	25	71.43	11.11	75	21.13	58.33	21.74	68.12	40	50	16.67	28.12	15.25	56.86	10	45.45	6.67	38.78	11.11	34.43	8.86	36.96	10.34
COG3	HsaINT0037782	chr13:45530781-45534701	3921	chr13:45530682-45530780=45534702-45536625:+	IR-S	16.67	45.45	7.14	58.33	16.67	34.78	6.9	60.98	18.52	47.06	11.76	48.84	8.57	54.29	16	29.41	48.84	28.89	37.93	20	38.46	11.54	25.93	12.2	28	21.57	31.25	9.52	40	17.07	56.36	22.22	50	23.08	24.53	22.22	35.14	22.22	55.56	24.14	35.71	19.23	30.43	20
COG7	HsaINT0037864	chr16:23418828-23424748	5921	chr16:23424749-23424947=23418700-23418827:-	IR-S	17.65	81.82	25.71	73.91	5.88	77.78	11.11	100	16.67	45.83	7.69	51.72	31.43	77.78	28.21	33.33	83.33	55	81.25	25.71	70	16.67	61.29	35.29	37.93	23.08	41.18	26.15	58.33	39.53	60	15.79	42.86	15.38	15.79	29.41	63.64	16.13	55.56	46.67	27.27	11.11	23.08	20
COG7	HsaINT0037865	chr16:23417122-23418699	1578	chr16:23418700-23418827=23416967-23417121:-	IR-S	2.56	63.64	1.82	45.45	17.24	45.45	18.18	62.5	17.07	75	15.94	52.38	0	50	19.15	58.06	79.17	44.44	82.61	36.84	72.73	22.22	55.1	31.58	31.43	11.48	51.35	31.43	80.65	39.73	80.33	25	33.33	24.14	26.67	26.67	37.5	14.29	29.41	16.13	35.48	13.51	22.22	6.67
COG8	HsaINT0037871	chr16:69329180-69330812	1633	chr16:69330813-69331095=69328621-69329179:-	IR-S	4.76	74.19	12.82	76	11.11	66.67	8.2	73.91	17.24	77.78	13.64	63.16	5.88	52.94	13.04	48.15	44	33.33	71.43	2.56	28.33	2.86	48.15	16	45.45	10	42.86	15.79	80	18.92	66.67	1.27	16.36	1.96	38.89	2.56	37.14	2.7	20	4.48	25	11.54	12.5	7.25
COMTD1	HsaINT0039956	chr10:75235744-75235834	91	chr10:75235835-75236012=75235616-75235743:-	IR-S	18.37	60.94	29.03	75.61	15.79	71.13	20	55.1	17.95	80	14.29	78.26	13.89	70.11	17.89	0	60	14.29	63.64	33.33	56.25	17.65	91.67	33.33	100	50	87.5	60	66.67	42.86	50	41.18	51.72	65.85	62.71	29.31	60.24	24.24	60	26.79	64.23	64.29	72	40.43
COMTD1	HsaINT0039957	chr10:75235373-75235615	243	chr10:75235616-75235743=75235267-75235372:-	IR-S	13.33	45.34	13.33	44	8.7	50.56	13.04	37.5	19.48	55	7.69	51.9	23.64	50	14.55	14.29	51.35	0	53.85	5.88	46.88	25	66.67	0	66.67	20	71.43	9.09	50	0	37.5	35.21	63.44	37.93	55.26	23.08	57.69	26.19	46.51	22	56.13	35.14	60.66	18.52
COQ10A	HsaINT0040169	chr12:56267941-56269058	1118	chr12:56267794-56267940=56269059-56269251:+	IR-S	24.68	72.63	33.33	81.51	25	78.72	23.26	74.44	41.82	86.05	38.71	78.49	32	86.36	19.23	31.76	61.02	23.08	51.52	35.56	68.42	36.96	74.14	44.93	80.65	28.7	77.14	35.14	55.56	23.26	60	26.09	46.03	26.47	53.66	40.98	50.88	30.43	59.26	21.21	50.82	21.21	54.84	28.21
COQ4	HsaINT0040189	chr9:128323148-128325142	1995	chr9:128323016-128323147=128325143-128325239:+	IR-S	18.84	21.43	12.68	25.49	15.91	18.75	19.15	36.59	16.98	26.32	6.9	25	21.74	25	24	17.53	15.07	11.63	22.86	19.28	13.74	12.58	15.38	11.52	12	5.17	10.2	16.22	16.67	16.83	27.27	17.86	13.79	10.18	16.81	16.18	16.5	25.97	25.37	13.48	8.93	6.78	16.13	19.51
COQ4	HsaINT0040191	chr9:128325882-128332152	6271	chr9:128325779-128325881=128332153-128332282:+	IR-C	11.67	64.71	21.52	82.22	22.33	78.79	19.67	80.65	17.73	82.26	28.26	76.34	24.03	81.05	20.59	31.87	76.47	25.52	63.38	34.62	68.99	27.95	75.82	26.58	61.48	29.07	78.77	29.6	81.43	19.01	62.5	29.46	74.77	40.8	64.59	39.78	60.22	46.46	80.71	34.55	63.64	41.62	70.31	33.33
COQ4	HsaINT0040192	chr9:128332283-128332849	567	chr9:128332153-128332282=128332850-128332943:+	IR-S	10.79	69.11	12.99	59.76	12.24	62.43	15.49	66.67	12.26	58.57	11.52	69.11	13.92	69.63	12.5	20	58.93	27.27	49.02	27	63.23	25.47	73.91	21.7	62.35	25.52	62.54	21.85	62.01	14.71	35.71	26.43	59.63	30.88	59.89	36.4	49.82	39.93	63.31	27.47	54.59	29.06	64.95	25.69
COQ6	HsaINT0040206	chr14:73955929-73958146	2218	chr14:73955805-73955928=73958147-73958277:+	IR-S	6.67	50	13.04	52	5	42.11	4.35	66.67	0	22.22	12.5	69.23	6.25	13.04	9.68	8.57	51.22	14.29	41.38	10.77	38.21	7.14	46.67	13.04	28.57	19.05	43.86	15.56	42.86	2.33	25	7.14	45	13.64	27.87	15.38	24.44	23.81	25	6.06	45.1	21.05	39.53	13.51
COQ6	HsaINT0040207	chr14:73958278-73958970	693	chr14:73958147-73958277=73958971-73959078:+	IR-C	38.46	78.95	9.09	80	20	94.29	27.27	100	12.5	100	33.33	100	14.29	92.86	40	30.77	57.89	42.86	77.78	41.46	84.81	35.29	95	33.33	82.22	45.45	78.95	23.53	94.44	54.55	80.49	25.58	75.61	50	63.64	50	62.16	26.67	75.76	22.73	69.57	46.15	61.9	14.29
COQ9	HsaINT0040223	chr16:57457016-57458245	1230	chr16:57456931-57457015=57458246-57458350:+	IR-C	9.88	58.97	6.29	56.25	6.47	70.45	9.45	54.1	11.11	63.11	8.77	51.43	6.98	58.33	6.74	13.51	41.18	8.77	56.25	13.21	47.22	14.61	72.55	17.24	50	16.67	67.35	25	58.82	20	38.46	11.92	39.39	25.49	44.36	22.22	29.73	16.5	46.67	22.06	34	17.74	47.66	8.77
COX15	HsaINT0040359	chr10:99718501-99720986	2486	chr10:99720987-99721068=99718346-99718500:-	IR-S	7.14	36	22.08	37.5	9.63	42.31	8.74	65.85	6.98	45.1	7.27	40.54	9.52	25	15.7	50	47.37	35.9	60	17.46	43.28	16.13	37.5	13.33	29.41	21.43	29.73	16.92	44.44	27.47	68	21.31	30	18.31	25.93	21.43	21.21	18.03	14.29	13.51	16	15.94	32.08	23.64
COX15	HsaINT0040360	chr10:99716462-99718345	1884	chr10:99718346-99718500=99716348-99716461:-	IR-S	12	69.57	13.46	64.52	10.24	44.3	15.15	81.82	14.29	69.49	14.75	75	12.64	76.74	14.75	43.1	74.12	40.74	77.05	29.41	58.18	23.68	65.85	29.9	33.33	32.04	42.86	31.25	69.49	42.86	70.94	25.64	54.17	25.27	40.54	22.22	42.86	30.12	33.33	15.07	61.4	12.64	32.35	11.9
COX18	HsaINT0040367	chr4:73068130-73069316	1187	chr4:73069317-73069755=73068029-73068129:-	IR-S	1.75	42.86	4.48	16.67	6.38	45.45	1.59	33.33	18.02	75.16	0	25	7.32	11.11	0	18.42	88.89	57.76	58.29	43.31	62.6	18.37	60.98	4.17	37.14	22.22	27.27	5.88	60	38.22	72.79	7.14	28.89	44.55	37.86	12.82	22.22	14.29	54.02	11.11	33.33	61.17	28.57	35.14
CPAMD8	HsaINT0040543	chr19:16903858-16904225	368	chr19:16904226-16904362=16903702-16903857:-	IR-S	33.33	57.14	14.29	53.85	11.11	73.68	100	81.82	33.33	80	29.41	65.52	0	75.76	6.67	5.88	58.14	9.09	63.03	33.33	67.21	33.33	75	16.13	81.18	12.82	79.78	40	55.22	18.52	54.39	25	55.56	66.67	58.62	25	77.78	20	62.96	55.56	65.52	0	51.72	45.45
CPAMD8	HsaINT0040553	chr19:16893340-16896175	2836	chr19:16896176-16896326=16892951-16893339:-	IR-S	100	89.74	100	95.45	100	93.75	100	87.5	81.82	81.82	100	92.59	83.33	100	100	81.82	82.35	100	86.11	88.89	80.69	71.43	74.55	88.24	84.85	91.67	83.33	62.5	94.74	100	100	97.14	97.26	100	95.45	91.04	100	96.67	89.04	100	89.19	100	96.36	88.24
CPNE1	HsaINT0040684	chr20:35630796-35630900	105	chr20:35630901-35631034=35630741-35630795:-	IR-S	3.03	20.6	2.97	36.22	1.94	39.67	2.85	41.59	3.9	55.96	3.87	47.52	6.38	24.64	15.56	37.08	72.52	20.63	67.05	12.34	65.62	17.43	72.74	15.5	64.33	14.04	65.76	29.7	57.53	32.66	69.11	37.2	56.7	24.34	56.39	15.81	52.75	21.58	64.46	21.18	65.28	18.94	67.7	31.94
CPNE1	HsaINT0040685	chr20:35630491-35630740	250	chr20:35630741-35630795=35630439-35630490:-	IR-C	8.11	22.62	1.86	42.02	2.2	44.72	2.31	42.14	5.03	48.04	4.54	50.21	8.74	20.26	12.73	34.45	67.22	20	62.52	10.68	64.45	19.4	72.33	14.78	59.81	13.33	65.02	25.32	60.69	28.23	66.09	21.61	50.69	21.86	52.12	15.77	43.38	19.39	66.37	18.54	59.92	17.14	60.86	28.67
CPNE1	HsaINT0040686	chr20:35627414-35630438	3025	chr20:35630439-35630490=35627280-35627413:-	IR-S	23.43	71.1	4.87	50.8	4.04	54.77	4.53	63.89	3	54.26	4.59	58.19	23.71	61.73	41.07	40.54	76.18	10.4	54.78	7.9	54.28	12.9	55.11	12.64	44.27	11.86	47.68	38.41	72.44	39.66	72.14	41.18	63.6	14.98	42.82	15.69	42.21	13.17	41.47	14.46	44.25	10.54	42.79	41.67
CPNE1	HsaINT0040687	chr20:35626804-35627279	476	chr20:35627280-35627413=35626567-35626803:-	IR-S	66.13	90.89	14.07	74.29	12.53	72.9	15.51	74.85	17.42	70.65	10.48	74.75	73.42	92.28	73.85	68.8	83.54	19.77	63.08	22.63	67.61	25.84	68.55	21.33	58.07	19.75	57.46	64.36	84.09	56.39	76.66	70.84	82.19	28.54	62.23	28.15	61.6	30.71	64.11	26.13	64.2	25.89	64.07	66.87
CPNE1	HsaINT0040688	chr20:35626382-35626566	185	chr20:35626567-35626803=35626044-35626381:-	IR-S	25	70.41	4.25	46.94	2.37	49.35	3.63	53.67	5.25	54.88	3.65	49.82	24.79	72.2	25.4	40.88	75.46	10.99	47.23	9.16	43.12	10.05	38.34	4.18	28.98	8.24	30.13	33.87	58.27	33.91	70.64	29.49	57.13	15.45	38.39	12.11	38.49	13.94	41.88	10.08	37.9	10.14	35.01	32.88
CPNE7	HsaINT0040779	chr16:89587103-89588674	1572	chr16:89587043-89587102=89588675-89588808:+	IR-S	29.41	90.79	20	87.56	80	97.69	45.45	92.92	37.5	80	100	100	39.13	90.41	42.86	62.5	89.54	57.89	96.55	75	99.08	0	100	14.29	87.34	85.71	96.77	60	92.23	63.64	95.12	23.4	86.36	44.83	80.85	53.85	92.71	37.78	93.72	14.29	86.47	65.22	97.06	17.65
CPNE7	HsaINT0040784	chr16:89595604-89596483	880	chr16:89595367-89595603=89596484-89597246:+	IR-S	46.67	88.87	25.93	87.83	69.23	91.04	63.64	93.07	18.92	85.67	75	90.58	47.37	90.81	80	24.32	67.49	6.38	48.39	15.15	49.78	0	37.88	9.68	44.86	0	42.14	9.52	63.22	21.74	72.31	0	19.02	3.45	19.58	4.76	26.83	1.72	15.62	6.12	16.53	3.23	12.24	1.23
CPSF3L	HsaINT0040967	chr1:1315619-1319295	3677	chr1:1319296-1319524=1315520-1315618:-	IR-C	27.51	68.54	22.89	75.83	23.31	81.33	21.24	86.8	20.84	84.15	17.15	82.53	41.3	77.71	22.86	22.93	86.04	24.09	84	20.77	78.54	43.5	78.46	22.15	72.23	14.47	74.75	32.11	72.76	22.1	82.92	31.06	83.6	44.02	83.13	33.99	79.06	41.7	82.84	28.97	79.49	16.9	80.69	13.21
CPSF4	HsaINT0040978	chr7:99452441-99453965	1525	chr7:99452368-99452440=99453966-99454136:+	IR-C	10.91	91.01	25.22	89.21	18.44	90.18	26.11	97.55	28.97	94.29	16.03	93.39	25.45	91.49	30	32.42	87.01	31.94	85.12	25	85.01	35.4	82.26	24.1	78.09	32.37	76.43	19.8	77.32	27.84	81.03	68.48	91.15	68.18	89.28	63.73	88.07	63.16	90.07	66.45	91.34	69.13	88.89	50.49
CPSF6	HsaINT0040991	chr12:69262563-69269511	6949	chr12:69262373-69262562=69269512-69274358:+	IR-S	2.91	21.96	4.15	27.11	5.51	38.93	3.77	31.28	6.41	39.27	8.16	41.69	5.29	22.58	6.4	45.71	71.43	30.47	59.03	18.75	52.84	27.4	60.66	23.11	46.56	20.53	60.13	31.55	62.96	37.3	69.46	20.61	46.99	23.2	32.24	26.4	33.33	23.81	52.04	15.69	40	17.81	43.19	15.69
CRBN	HsaINT0041255	chr3:3154832-3156218	1387	chr3:3156219-3156281=3154747-3154831:-	IR-S	15.79	14.29	10	80	13.85	67.74	29.41	86.21	28.57	61.54	27.66	56.76	15.38	84.62	30.77	44.44	62.5	34.78	85.19	12.82	84	20	75	11.11	43.75	15.56	72.73	45.45	60	48.57	95	8.33	12.5	12	16.67	18.18	47.37	12.5	61.54	21.74	16.13	6.67	35.48	2.7
CRBN	HsaINT0041256	chr3:3154076-3154746	671	chr3:3154747-3154831=3153960-3154075:-	IR-C	0	65.22	12	40.74	5.26	53.49	18.52	54.84	5	63.64	11.11	40	11.11	44	13.33	22.22	75.76	47.06	72.41	9.43	53.85	33.33	76	19.05	41.18	19.15	58.62	17.65	60.98	33.33	60	2.56	29.03	11.86	29.41	16.36	29.63	16.67	41.18	16.13	14.29	7.69	41.67	9.09
CREB3L4	HsaINT0041318	chr1:153968185-153968521	337	chr1:153967921-153968184=153968522-153968699:+	IR-C	18.64	88.52	20.61	75.38	18.52	89.74	37.86	87.5	25.93	72.7	25.93	88.28	45.3	94.87	27.27	53.25	75	24.53	85.66	65.22	94.92	39.05	89.33	37.5	74.44	28.36	84.71	39.39	87.5	22.58	73.53	34.25	64.18	28.57	62.91	25	47.17	60.98	100	41.82	75.46	14.67	84.71	14.29
CREBZF	HsaINT0041374	chr11:85663602-85663814	213	chr11:85663815-85665138=85663524-85663601:-	IR-S	39.13	37.41	37	47.24	37.46	44.39	58.37	52.17	37.31	49.09	39.69	43.36	41.78	37.21	44.44	59.12	65.79	68.25	65.19	39.24	55.77	53.68	55.38	31.49	47.78	46.91	57.49	44.35	60.86	61.34	71.63	34.75	45.02	35.35	48.72	38.58	39.13	40.28	50.38	37.14	54.41	37.12	56.47	32.11
CREBZF	HsaINT0041375	chr11:85661750-85662388	639	chr11:85662389-85662457=85661637-85661749:-	IR-C	100	97.99	95	98.41	96.88	98.26	100	100	97.89	100	100	98.63	100	100	97.63	100	100	97.35	100	98.61	97.56	98.29	100	98.4	100	98.73	100	100	100	100	100	100	97.14	92.31	97.65	100	97.73	100	100	93.33	98.15	100	97.92	100
CREBZF	HsaINT0041376	chr11:85660598-85661636	1039	chr11:85661637-85661749=85657564-85660597:-	IR-C	100	99.33	92.99	98.95	100	98.4	97.95	99.32	91.41	98.68	95.15	100	100	100	94.55	100	100	100	100	100	97.38	91.87	95.06	93.24	97.49	100	97.19	98.61	92.76	100	98.53	91.75	95.15	92.93	100	96.74	91.58	97.24	96.13	83.06	96.45	100	100	100
CRELD1	HsaINT0041384	chr3:9933921-9934419	499	chr3:9933841-9933920=9934420-9934612:+	IR-C	20	73.53	17.65	79.1	30.77	72.31	27.27	76.47	36	74.65	33.33	77.32	46.15	76	50	25.33	55.13	10.14	50.7	8.7	54.29	23.33	59.02	13.85	69.11	17.33	58.73	13.33	57.89	16	45.45	20.3	46.67	25.65	42.98	21.33	40.62	24.37	48.45	16.28	38.72	18	44.88	17.07
CRELD1	HsaINT0041385	chr3:9943516-9943901	386	chr3:9943381-9943515=9943902-9944095:+	IR-C	35.48	95.09	42.86	95.48	50	91.3	44.68	94.62	44.44	96.49	53.85	94.24	68	91.4	48.72	31.51	90.13	55.1	90	53.57	92.56	67.74	97.77	71.43	92.11	62.5	93.43	55.56	92.51	50.98	88.07	94.44	98.86	90.48	97.13	94.59	95.45	100	100	80.65	97.32	90.91	98.24	69.7
CRELD1	HsaINT0041386	chr3:9944096-9944364	269	chr3:9943902-9944095=9944365-9945413:+	IR-C	12	66.83	38.46	73.64	46.15	65.22	31.25	45.54	33.33	65.75	41.67	69.47	20	70.32	22.22	24.71	52.83	40	56.6	60	62.54	73.33	65.07	33.33	74.52	53.33	63.7	38.89	60.42	20	46.34	84	90.55	82.61	92.81	54.84	87.8	88.89	89.57	52	92.48	100	96.41	82.61
CRELD1	HsaINT0041394	chr3:9943173-9943380	208	chr3:9943077-9943172=9943381-9943515:+	IR-C	3.7	80.75	7.5	78.3	8.05	73.91	2.7	84.98	6.06	81.62	7.14	86.08	7.14	78.26	13.21	19.55	85.27	20.28	83.64	22.22	78.61	20.53	79.76	18.6	79.43	16.67	80.46	25.47	81.58	19.47	79.83	7.88	49.82	15.07	53.96	11.81	55.52	9.14	57.66	10.82	61.17	8.82	51.03	8.37
CRELD2	HsaINT0041404	chr22:49923318-49924359	1042	chr22:49923234-49923317=49924360-49924455:+	IR-C	10.09	76.3	2.94	68.25	2.82	74.74	6.25	71.88	3.36	64.89	1.03	85.59	10	70.7	21.62	19.35	82.8	11.11	74.23	9.43	77.86	17.04	84.05	8.57	75.9	14.29	75.9	25.84	78.67	15.89	70.83	17.16	69.61	23.21	67.92	27.08	58.1	23.33	76.35	17.35	64.75	14.29	64.43	16.38
CRLF3	HsaINT0041553	chr17:30792573-30793449	877	chr17:30793450-30793672=30792440-30792572:-	IR-S	15.49	62.96	7.46	39.39	12.73	45.95	9.09	27.66	12	80	10.2	48.84	13.51	80	15.66	15.79	40	17.24	22.58	18.18	50	28	76.47	15.15	71.43	44.83	25.93	21.43	70	18.52	35.71	14.29	71.43	100	100	38.46	100	7.69	77.78	75	81.82	22.58	85.71	23.08
CROCC	HsaINT0041609	chr1:16951123-16953301	2179	chr1:16950953-16951122=16953302-16953481:+	IR-S	27.76	53.12	40.74	48.36	43.5	42.38	55.29	41.94	45.82	55.36	34.02	49.24	27.27	45.22	39.74	52.94	67.01	45.88	65.35	57.77	66	60.56	76.62	54.29	57.37	49.09	63.1	46.33	67.81	47.34	61.27	54.05	68.88	43.7	58.19	58.8	71.5	61.81	65.51	46.84	64.42	42.99	54.8	42.86
CRTC1	HsaINT0041702	chr19:18768794-18771441	2648	chr19:18768485-18768793=18771442-18771546:+	IR-S	21.74	80.95	17.39	83.61	24.44	96.83	27.78	92.31	10	100	47.06	91.49	44.44	70.59	23.08	29.41	77.46	33.33	76.32	19.4	79	21.35	92.7	46.03	80.7	37.25	71.93	38.78	75.38	22.22	81.08	23.21	60.81	29.17	59.49	23.32	53.02	21.24	64.55	19	66.49	38.36	64.32	25.55
CRTC1	HsaINT0041704	chr19:18774987-18775640	654	chr19:18774900-18774986=18775641-18775821:+	IR-S	7.69	49.02	11.11	34.74	7.94	55.34	9.68	55.93	23.4	37.35	16.67	40.98	16.13	44.44	18.84	28.57	63.83	6.45	64.23	31.15	67.66	22.22	40.71	35.29	46.94	20.59	52.76	27.78	50	33.33	67.82	13.92	26.44	2.22	39.13	20.83	30.16	10.81	25.58	14.81	34.15	1.89	32.65	13.51
CRTC2	HsaINT0041716	chr1:153951667-153952017	351	chr1:153952018-153952262=153951260-153951666:-	IR-S	11.9	70.07	23.23	76.76	20.55	67.55	29.23	84.57	17.89	75.34	17.95	85.8	21.52	82.98	36.23	11.83	56.41	24.73	58.45	15.66	56.97	10.34	40.22	8.11	37.81	11.11	48.15	24.05	47.29	22.08	60.44	24.24	44.95	20.34	51.67	37.84	65.25	20.63	46.45	18.6	52	19.3	48.81	20.75
CRTC2	HsaINT0041724	chr1:153952835-153953265	431	chr1:153953266-153953369=153952805-153952834:-	IR-S	18.89	44	0	38.14	0	34.58	10.58	40.92	0	47.34	14.29	41.02	8.58	24.06	7.16	21.27	48.73	3.95	71.44	18.49	45.84	6.25	51.76	19.46	32.64	11.26	48.27	6.8	49.59	10.58	54.97	11.02	49.85	29.35	53.33	28.21	34.03	16.97	45.34	23.99	48.05	20.45	49.89	19.14
CRTC2	HsaINT0041725	chr1:153952636-153952804	169	chr1:153952805-153952834=153952571-153952635:-	IR-S	27.71	60.26	11.33	56.2	13.67	70.8	28.38	73.5	20.35	63.2	11.33	60.6	57.14	65.56	30.64	28.91	81.54	46.04	92.97	25.31	82.38	29.5	73.27	16.31	69.25	13.93	73.09	67.03	74.52	33.77	93.1	43.22	66.71	53.31	63.86	53.85	75.33	36.17	68.61	15.32	65.88	49.53	63.41	28.1
CSAD	HsaINT0041900	chr12:53171442-53171881	440	chr12:53171882-53171988=53171326-53171441:-	IR-S	20	48.15	26.32	63.93	20	50.65	16.67	69.01	0	59.38	0	82.76	0	26.32	29.41	33.33	59.29	12.82	56.36	13.43	45.28	17.95	52.27	18.37	46.22	22.73	38.35	5.66	42.64	27.03	58.97	15.79	44.19	33.33	49.47	27.27	46.99	36	52.94	25	61.82	51.52	55.34	12.5
CSAD	HsaINT0041901	chr12:53170503-53171325	823	chr12:53171326-53171441=53170423-53170502:-	IR-S	11.11	81.82	55.56	83.78	50	75.51	60	80	23.08	68.63	55.56	72.73	55.56	87.5	28.57	56.25	80.65	40	57.89	40	71.67	27.27	54.76	39.13	65.08	29.03	81.13	17.65	69.86	47.06	57.5	46.67	71.01	78.95	82.61	80	93.75	58.62	89.66	86.67	84.42	53.85	76.12	25
CSGALNACT2	HsaINT0042053	chr10:43160596-43163865	3270	chr10:43160494-43160595=43163866-43164044:+	IR-C	4.35	33.33	0	20	12.5	55.56	0	50	20	25	17.65	14.29	0	50	16.67	36.84	26.32	26.32	45.45	36.84	50	22.58	100	25.93	46.67	13.04	64.71	28.57	40	14.29	33.33	18.18	22.45	30	60	13.64	35.71	33.33	44	20	54.55	30.43	50	20
CSK	HsaINT0042068	chr15:74782149-74782667	519	chr15:74782084-74782148=74782668-74782720:+	IR-S	95.65	100	83.33	95	95.45	93.55	96.15	94.87	92.11	100	89.47	100	86.96	100	88.24	94.87	100	95	100	92.42	97.8	98.37	97.89	100	98.02	83.33	90.24	92.31	100	89.19	100	100	100	100	100	100	98.21	100	100	100	100	100	100	100
CSNK1D	HsaINT0042358	chr17:82246040-82248874	2835	chr17:82248875-82249014=82245976-82246039:-	IR-C	7.21	66.93	11.79	66.27	6.51	72.27	10.08	69.4	7.62	66.67	11.52	77.01	13.08	64.49	15.08	22.92	81.56	39.53	78.18	31.71	76.16	29.79	70.34	14.5	60.94	20	73.12	39.29	87.01	38.46	83.78	8.71	46.4	17.13	52.21	24.44	58.57	11.94	54.12	13.21	47.6	8.41	46.44	9.78
CSNK1D	HsaINT0042359	chr17:82244832-82245975	1144	chr17:82245976-82246039=82244364-82244831:-	IR-C	6.29	35.44	10.79	42.97	5.21	44.8	5.19	38.5	4.46	44.44	6.06	47.74	7.59	43.18	6.02	50	78.1	57.14	79.49	21.21	69.93	23.6	60.93	9.62	54.81	29.55	67.25	36.17	71.03	41.18	82.02	14.71	56.28	25.93	50.72	21.5	64.62	20	57.78	16.95	54.55	9.22	50.19	7.8
CSNK1E	HsaINT0042361	chr22:38291939-38293254	1316	chr22:38293255-38293319=38290691-38291938:-	IR-S	12.23	72.16	25.36	75.77	20.7	70.53	18.89	76.47	20.5	75.17	21.88	65.36	22.43	65.43	30.28	31.61	68.42	21.71	67.61	26.7	64.74	24.89	76.72	35.95	75.92	20.62	70.62	23.23	68.22	33.58	65.61	31	32.22	30.32	49.87	31.01	50.16	28.62	60	26.24	54.55	23.28	61.99	25.48
CSNK2A2	HsaINT0042425	chr16:58158354-58164053	5700	chr16:58164054-58164147=58157908-58158353:-	IR-C	35.92	46.43	48.08	50	35.58	58.54	45.2	60.56	41.41	69.57	46.15	52.38	33.6	47.5	42.01	33.33	49.57	40.86	44.19	22.37	48.97	31.91	47.83	28.71	37.08	29.63	40	43.42	52.24	31.43	37.82	25.27	32	21.33	21.05	31.51	18.37	27.54	27.27	27.38	31.48	37.08	34.83	31.08
CSTF2	HsaINT0042550	chrX:100837450-100838238	789	chrX:100837339-100837449=100838239-100838364:+	IR-S	5.45	73.72	5.08	76.19	3.76	64	3.14	82.64	5.05	84.62	8.15	81.02	4.67	86.99	10	26.87	89.08	18.03	69.89	16.07	71.3	7.55	56.52	3.23	50.65	7.38	69.81	7.81	72.13	33.33	79.63	2.27	24.68	4.62	19.1	4.92	28.95	3.23	19.27	0	18.52	1.23	13.89	0
CTNS	HsaINT0042923	chr17:3660351-3660616	266	chr17:3660236-3660350=3660617-3663103:+	IR-S	97.1	74.36	100	94.06	93.65	86.21	100	92.41	86.67	96.23	95.65	93.75	95.92	92.21	95.92	86.67	85.96	93.75	90.32	90.91	89.9	92.16	96.77	89.19	92.73	95.74	96.15	88.24	95.12	75	95.12	100	95.74	100	100	100	97.22	100	100	95.24	95.92	100	96.83	100
CTNS	HsaINT0042925	chr17:3658176-3659857	1682	chr17:3658005-3658175=3659858-3659975:+	IR-S	11.63	82.28	20.93	82.42	8.2	78.95	7.14	91.78	25	90.48	10	87.23	23.81	93.85	17.65	47.83	81.54	30.43	89.36	58.33	87.41	27.27	92.08	24.14	87.8	25	87.8	35	95.18	42.86	63.27	26.32	76.09	41.46	72	51.35	82.61	28	76.12	30.23	84.21	39.62	87.18	26.09
CTNS	HsaINT0042933	chr17:3656796-3658004	1209	chr17:3656676-3656795=3658005-3658175:+	IR-S	12.5	74.19	11.11	67.27	16.28	61.29	9.09	91.49	3.7	76.12	10.53	85	23.08	53.85	23.53	23.81	72.09	27.27	84.91	13.04	78.72	7.69	77.27	25.93	48.15	23.81	65.52	9.09	75	0	84.62	5.26	58.49	24.14	67.57	11.11	54.39	9.52	26.92	10	54.1	6.98	51.11	6.98
CTSA	HsaINT0043023	chr20:45895134-45896964	1831	chr20:45894994-45895133=45896965-45897040:+	IR-S	4.7	52.5	4.96	53.67	10.81	60	8.22	67.37	8.82	65.52	8.2	73.86	9.68	59.24	5.82	17.95	67.09	20	61.62	12.2	69.74	17.89	65.75	26.47	77.63	18.75	56.59	14.29	67.62	18.42	55.1	15.38	58.7	25.81	50.98	15	55.17	29.41	72.84	19.4	61.36	20.55	57.65	12.33
CTSA	HsaINT0043024	chr20:45897041-45897716	676	chr20:45896965-45897040=45897717-45897806:+	IR-S	5.51	58.62	4.76	51.45	5.69	49.02	9.23	63.64	6.25	52.94	5.13	65.93	10.59	56.35	5.04	15	76.47	17.65	77.22	21.43	68.97	26.32	72.26	11.48	49.3	19.4	50.94	10	54.93	7.69	62.86	26.53	87.5	26.53	82.86	31.43	76.19	28.3	63.64	41.18	55.81	34.88	65	5.08
CTSA	HsaINT0043025	chr20:45897807-45898004	198	chr20:45897717-45897806=45898005-45898109:+	IR-S	5.97	61.03	2.44	41.72	7.61	49.66	5.02	54.57	5.52	43.97	6.29	64.71	3.88	60.11	4.88	6.52	60.34	16.85	70	16.5	63.3	12.07	67.87	18.03	62.34	15.07	60.36	14.58	67.11	14.29	60.25	27.43	54.65	26.19	63.64	25.49	48.57	16.67	66.86	19.48	63.52	17.95	54.64	18.07
CTSK	HsaINT0043101	chr1:150806807-150808213	1407	chr1:150808214-150808336=150806686-150806806:-	IR-S	0	25.77	0	13.52	0	17.24	10.73	28.81	3.5	7.11	7.32	0	2.2	25	8.27	32.69	28.69	0	11.11	41.42	0	9.74	40.23	7.28	14.71	0	14.29	0	41.91	0	6.67	28.13	47.6	43.14	53.44	19.54	45.31	23.5	43.42	20	45.31	30.46	29.12	22.44
CTTN	HsaINT0043160	chr11:70420511-70422939	2429	chr11:70420400-70420510=70422940-70422995:+	IR-C	6.79	68.57	7.76	61.82	9.45	72.51	7.95	71.31	10.8	77.55	14.63	84.1	8.16	73.33	10.07	21.03	70.93	18.31	65.6	20.88	63.29	15.27	60.44	19.15	63.6	15.58	70.55	20.08	70.79	16.85	74.18	26.84	71.47	37.19	69.97	27.97	70.07	17.93	55.9	39.1	74.04	23.63	74.4	22.87
CTTN	HsaINT0043167	chr11:70435120-70435465	346	chr11:70435026-70435119=70435466-70435744:+	IR-S	96.69	95.19	97.02	97.43	97.75	97.39	97.1	96.79	97.46	98.19	95.16	96.11	96.24	95.29	96.64	88.89	92.32	94.42	90.65	89.47	93.94	91.91	93.71	97.92	95.42	93.99	93.07	93.36	90	91.23	90.44	93.25	87.01	91.56	89.98	90.78	90.09	96.98	93.19	93.71	92.14	93.56	91.37	94.94
CTTN	HsaINT0043176	chr11:70419857-70420399	543	chr11:70419746-70419856=70420400-70420510:+	IR-C	4.25	51.04	3.29	50.22	4.33	45.62	6.02	54.51	3.93	45.85	5.01	33.05	6.78	57.87	10.33	18.35	74.28	13.92	61.2	11.46	57.88	12.4	63.84	9.29	50.52	10.29	47.45	14.53	62.89	20	68.45	11.01	43.74	11.2	36.71	6.86	38.36	9.52	35.73	6.81	34.76	7.11	34.28	6.82
CUEDC1	HsaINT0043302	chr17:57867416-57868149	734	chr17:57868150-57868243=57867357-57867415:-	IR-S	33.33	60	24.14	66.67	23.53	70	20	66.67	31.58	78.72	33.33	73.33	18.18	72.73	17.65	17.65	43.84	26.92	56.45	36.31	70.26	25.15	71.83	25.62	63.24	36.21	62.24	25.2	61.15	13.04	20.35	23.81	44.68	16.48	53.4	17.78	36.71	26.44	43.4	25.66	51.61	17.74	56.83	19.71
CUEDC1	HsaINT0043303	chr17:57866545-57867356	812	chr17:57867357-57867415=57866474-57866544:-	IR-S	0	60	25	63.64	29.82	66.67	12	66.67	21.57	65.22	18.75	80.95	20	64.29	7.69	19.59	48.51	14.02	65.03	30.29	69.98	30.06	67.62	19.23	63.79	25	66.92	22.31	56.13	22.22	36.62	21.43	40.62	17.89	40	28.89	26.61	23.81	51.28	16.25	43.18	18.12	50.28	20.25
CUL4A	HsaINT0043382	chr13:113229520-113233176	3657	chr13:113229446-113229519=113233177-113233339:+	IR-S	6.81	69.85	18.64	77	4.95	74.53	6.56	85.91	9.07	66.37	21.2	84.74	13.33	80.67	25.25	43.46	72.85	27.32	73.18	10.61	55.83	23.13	57.36	23.51	53.49	32.59	57.78	24.53	54.77	39.87	47.25	14.57	37.75	20.74	42.48	34.98	25	14.82	29.88	18.18	52.71	10.09	26.67	6.22
CUL4A	HsaINT0043385	chr13:113235146-113236822	1677	chr13:113235063-113235145=113236823-113236890:+	IR-C	6.01	70.69	7.84	64.71	2.19	54.01	9.77	73.77	7.55	61.06	9.33	77.4	10.34	68.89	12.82	23.08	76.47	34.02	73.17	12.87	53.01	18.92	57.33	13.24	39.13	13.64	56.46	22.03	57.89	26.03	71.79	6.49	14.67	9.52	26.98	10.45	28.3	8.33	16.67	4.48	19.05	5.13	16.92	7.53
CUL7	HsaINT0043428	chr6:43046602-43046879	278	chr6:43046880-43047107=43046511-43046601:-	IR-C	17.46	88.06	10.07	86.27	6.91	85.28	24.3	88.58	12.3	84.96	25.02	91.29	24	85.94	20.27	11.33	71.32	10.65	80.86	19.96	78.07	19.51	85.22	11.26	81.57	18.71	74.24	16.92	72.94	13.39	71.34	14.58	71.95	15.91	74.01	10.03	63.42	15.36	63.55	18	61.48	21.59	75.88	8.93
CUL9	HsaINT0043466	chr6:43205116-43205262	147	chr6:43204933-43205115=43205263-43205423:+	IR-S	100	60	0	56.52	0	63.64	20	76	14.29	65.96	0	60	0	72.73	33.33	25	60	17.65	62.79	10.34	58.33	29.41	85.96	0	57.14	13.33	52.78	15.79	70.67	8.33	53.25	16.67	58.9	8.57	56.16	25	49.25	14.29	61.9	31.25	80.49	15.15	62.75	3.45
CUL9	HsaINT0043469	chr6:43206511-43213148	6638	chr6:43206321-43206510=43213149-43213294:+	IR-S	0	20	0	35	20	42.31	33.33	29.23	42.86	32.14	14.29	35.71	28.57	17.39	33.33	25.71	33.33	19.05	36.59	16.13	20	12.82	17.07	9.43	24.37	36.36	23.75	16.28	28.57	23.53	34.78	0	24.59	14.29	13.87	8.2	13.18	6.38	17.46	1.75	26.03	8.33	20	0
CUL9	HsaINT0043488	chr6:43188119-43188522	404	chr6:43187713-43188118=43188523-43188715:+	IR-S	50	55.56	50	22.22	20	9.09	33.33	50	42.86	10	25	16.67	0	60	27.27	29.41	9.09	9.09	12.68	20	20.51	40	26.32	0	12	21.74	4	23.08	24	30.77	16.92	17.24	18.92	22.22	21.43	13.51	15.79	18.18	20	22.22	26.09	17.65	23.08	18.18
CUX2	HsaINT0043544	chr12:111342054-111347523	5470	chr12:111341780-111342053=111347524-111350554:+	IR-S	0	44	0	64.29	17.65	54.55	0	42.86	7.69	66.67	5.88	37.5	4.35	52.54	11.11	0	29.41	14.29	52	0	61.29	31.43	55.56	29.41	41.46	15.79	41.18	33.33	71.43	42.86	53.85	11.48	22.22	11.94	43.59	11.11	29.63	5.98	23.46	10.77	39.05	16.13	32.45	12.82
CWC25	HsaINT0043589	chr17:38809766-38810467	702	chr17:38810468-38810595=38809702-38809765:-	IR-S	33.33	91.58	28.3	86.49	20	73.77	60	91.18	38.1	83.87	51.02	97.22	34.78	91.55	44.12	46.15	95.29	45.45	76.47	30.43	83.89	21.43	74.29	20.69	55.93	33.33	67.74	42.03	83.18	50.77	94.52	6.25	26.67	9.09	14.75	9.09	36.11	9.28	20	17.46	22.03	12	34.21	20.48
CWF19L1	HsaINT0043607	chr10:100262064-100267570	5507	chr10:100267571-100267680=100261979-100262063:-	IR-S	21.57	75	28.57	20	24.32	17.65	25	60	20	18.18	28.57	50	22.58	53.85	9.52	3.7	20	36.84	60	12	33.33	15	25	20	45.45	33.33	44	15.38	24.14	41.67	14.29	50	33.33	5.88	21.74	6.67	28.57	28.57	37.5	77.78	55.56	27.27	14.29	25
CWF19L1	HsaINT0043617	chr10:100246936-100250247	3312	chr10:100250248-100250332=100246795-100246935:-	IR-S	3.12	30.3	7.89	34.69	5.15	54.39	8.24	59.38	4.55	62.5	9.68	58.49	5.13	47.37	16.92	25	61.9	15.38	52.94	19.3	48.65	5.56	36.59	11.11	16.67	9.38	43.75	22.58	65.96	21.43	64.71	4.76	27.27	18.75	16.13	11.11	26.32	17.24	33.33	9.68	12.5	1.82	33.33	2.7
CXorf23	HsaINT0043752	chrX:19917335-19929784	12450	chrX:19929785-19929940=19912862-19917334:-	IR-S	0	73.33	27.27	66.67	14.29	50	5.88	82.35	38.46	44.83	14.29	57.14	33.33	51.72	33.33	22.22	30	29.41	40	26.32	57.14	33.33	33.33	28.57	14.29	14.29	33.33	20	71.43	42.86	100	8.33	69.23	41.18	13.33	16.67	14.29	31.03	81.82	30	66.67	7.69	30.43	11.11
CXorf40B	HsaINT0043798	chrX:149937481-149938192	712	chrX:149938193-149938498=149937433-149937480:-	IR-S	11.81	89.35	27.92	83.12	12.77	84.47	35.44	95.13	3.53	89.27	12.73	96.75	11.36	79.17	17.76	36.23	78.06	48.72	84.78	22.43	64.18	28.96	79.93	13.04	62.5	7.56	73	31.91	46.34	34.49	70.97	17.24	27.27	21.04	22.45	10	10	15.94	50.44	26.18	21.84	11.81	48.57	22.26
CYB561D1	HsaINT0043872	chr1:109494288-109494519	232	chr1:109494079-109494287=109494520-109494623:+	IR-C	100	83.33	25	60	20	100	33.33	84.62	50	81.82	0	100	100	100	33.33	25	33.33	50	57.89	50	81.82	40.74	93.75	55.56	76.47	55.56	76.47	15.79	70.73	66.67	57.89	51.72	96.67	69.7	100	90.48	86.96	78.57	96.55	63.16	96.12	80.95	95.35	73.91
CYB5D1	HsaINT0043890	chr17:7858480-7858605	126	chr17:7858403-7858479=7858606-7858824:+	IR-S	17.33	69.23	8.57	62.96	17.14	37.14	10.81	54.55	14.94	60	19.4	67.57	9.09	77.78	8.82	30.77	88.24	24.32	41.94	13.33	56.67	33.33	61.29	33.33	61.29	37.93	58.33	28.57	81.82	38.46	61.54	22.22	61.29	12.73	60	16.42	66.1	25.93	37.93	25.49	58.82	15.38	59.18	23.4
CYB5D1	HsaINT0043891	chr17:7858825-7859381	557	chr17:7858606-7858824=7859382-7862282:+	IR-S	26.09	80	43.75	64.71	42.22	48.15	26.32	60	32.31	50	16.98	40	45.95	100	38.46	29.41	100	25	71.43	64.71	87.23	14.29	61.54	28.57	50	47.37	88.24	52.94	84	13.04	57.89	55.56	75	48.72	69.81	47.37	77.78	28.57	71.43	20	57.14	44.44	78.57	77.78
CYHR1	HsaINT0044040	chr8:144465097-144465570	474	chr8:144465571-144465648=144464809-144465096:-	IR-C	71.07	98.48	46.36	100	72.97	94.37	56.41	97.65	66.35	98.27	100	100	49.57	98.19	56.7	100	100	63.25	100	64.82	94.41	61.87	97.52	68.47	97.61	63.54	91.07	79.71	100	49.4	63.49	83.44	100	88.84	97.05	87.41	87.99	94.34	91.84	93.06	88.83	100	94.09	89.32
CYHR1	HsaINT0044043	chr8:144450771-144452358	1588	chr8:144452359-144452570=144449932-144450770:-	IR-S	51.6	84.19	55.75	90.94	49.23	81.4	68.89	86.77	51.67	87.33	54.49	85.5	47.82	88.17	51.62	63.23	70.7	48.23	49.07	37.1	61.71	40.19	60.4	32.93	47.75	32.53	63.31	29.01	58.66	46.34	56.79	34.52	43.35	24.9	41.1	31.15	49.83	25.63	43.2	20.99	50.82	23.5	49.57	28.98
CYP20A1	HsaINT0044138	chr2:203239135-203245845	6711	chr2:203238441-203239134=203245846-203245895:+	IR-S	11.11	23.08	17.95	23.08	3.45	25	14.29	0	17.24	9.68	28.57	20	26.32	50	4.76	15.79	21.74	29.03	29.73	19.15	42.47	31.58	30	41.46	24.14	22.58	25	16.67	33.33	27.27	46.67	46.94	80.95	46.67	48.15	28.21	68	53.49	48.39	44.19	55.56	68	50	47.06
CYP27C1	HsaINT0044202	chr2:127193298-127193788	491	chr2:127193789-127193867=127193094-127193297:-	IR-S	3.7	33.33	11.11	33.33	20	38.24	10	62.5	15.79	44.68	22.22	69.23	9.09	61.29	4.76	100	65.52	38.1	80.77	18.92	67.21	12.94	65.52	15.25	48.72	14.29	70	16.13	67.74	31.43	86.67	0	4	5.26	16.67	4.92	10.34	3.23	10	2.94	25	0	15.38	2.7
CYP2R1	HsaINT0044319	chr11:14885918-14891980	6063	chr11:14891981-14892205=14885776-14885917:-	IR-C	33.33	100	100	100	100	100	100	100	100	100	100	100	100	100	50	100	100	75	100	77.78	100	100	100	100	100	100	71.43	100	100	100	100	100	100	60	100	100	100	100	100	100	100	100	100	100
CYP2R1	HsaINT0044321	chr11:14879444-14880135	692	chr11:14880136-14880768=14879114-14879443:-	IR-C	20	71.43	6.25	30	8.11	64.29	5.88	60	3.7	60	8.33	50	17.65	63.64	100	20	84.62	16.67	25	16.67	68.42	14.29	71.43	15.79	33.33	22.22	50	27.27	42.86	0	50	20	55.56	5.26	47.37	23.81	0	16.13	41.18	0	33.33	10	42.86	20
CYP4V2	HsaINT0044534	chr4:186192038-186194499	2462	chr4:186191520-186192037=186194500-186194612:+	IR-S	100	100	100	100	100	88.24	100	100	80	100	100	100	78.95	100	100	81.82	88.24	88.57	85.71	78.57	81.4	55.56	86.67	80	80.95	64.71	92	100	100	100	77.78	48.94	70.37	51.72	75	61.54	81.25	68.42	57.14	72.22	71.43	54.55	53.85	45.95
CYP4V2	HsaINT0044538	chr4:186197131-186197532	402	chr4:186196940-186197130=186197533-186197602:+	IR-S	100	71.43	66.67	100	100	71.43	100	100	33.33	75	100	100	100	100	100	63.64	83.33	42.86	100	71.43	100	55.56	80	57.89	75	73.33	71.43	100	82.61	66.67	84.62	71.43	77.78	100	100	33.33	71.43	40	80.95	71.43	80	44.44	86.67	52.94
CYTH1	HsaINT0044603	chr17:78676170-78680189	4020	chr17:78680190-78680344=78674048-78676169:-	IR-S	32.31	82.28	12.62	76.62	12.5	89.04	46.67	91.03	23.64	86.55	35.38	80	27.27	82.93	29.29	42.45	75	42.86	75.15	19.58	63.42	17.99	60	18.01	47.37	20	61.54	29.41	60.64	46.99	84.95	15.76	43.5	20.44	38.14	13.78	39.67	22.31	54.84	22.96	54.09	20.68	48.66	14.66
CYTH3	HsaINT0044631	chr7:6165811-6170534	4724	chr7:6170535-6170646=6165734-6165810:-	IR-S	3.23	50	2.13	46.43	4.35	62.5	0	41.18	8.57	47.17	8.33	50	15.38	45.45	11.54	10.45	54.93	4.48	57.14	7.69	47.62	9.09	52.94	14.75	42.03	9.3	52.24	4.35	43.86	12	29.27	16.13	60	23.4	41.67	20.69	56.52	22.89	50.88	22.73	53.09	11.58	47.69	12.33
D2HGDH	HsaINT0044668	chr2:241744878-241750150	5273	chr2:241744709-241744877=241750151-241750294:+	IR-C	2.04	25.17	6.67	14.02	9.09	31.4	4.76	20	3.12	23.64	7.69	36.62	12.5	26.26	5.88	29.63	33.96	23.08	28.57	23.64	32.72	26.67	28.06	45.1	39.04	11.69	33	28.21	32.08	20	30.88	10.14	29.73	20.93	19.15	15.62	21.57	15.79	17.65	13.85	19.15	16.98	29.67	2.7
D2HGDH	HsaINT0044669	chr2:241750295-241751245	951	chr2:241750151-241750294=241751246-241751388:+	IR-S	5.08	29.34	0	14.02	1.82	37.65	2.86	26.03	0	18.59	0	36.67	4.17	21.03	7.69	17.46	39.77	13.33	31.95	9.38	20	4.76	13.61	0	10.58	22.45	16.16	23.94	21.45	31.71	39.93	7.94	8.77	0	9.59	4	25.66	25.71	8.77	14.89	10.89	2.33	22.73	0
D2HGDH	HsaINT0044670	chr2:241751389-241755848	4460	chr2:241751246-241751388=241755849-241756014:+	IR-S	6.38	88.05	23.81	87.88	15.56	80.91	20	81.13	22.22	85.79	25	81.21	25.81	91.5	29.17	54.93	90.36	47.54	84.98	34.88	88.34	50	87.23	35.48	78.24	45.1	83.13	36.17	90.62	34.29	85.91	38.71	79.39	47.37	66.67	29.41	76.12	55.56	81.25	32.14	75.76	25	75.51	33.33
DAB2IP	HsaINT0044762	chr9:121678782-121699324	20543	chr9:121678678-121678781=121699325-121699458:+	IR-S	8.11	0	23.53	15.38	11.63	17.65	6.67	100	16.67	6.67	30.43	28.57	15.79	0	3.85	33.33	31.43	17.65	26.53	56.1	20.99	36.96	33.33	40.43	25.93	23.08	58.33	41.18	33.33	24.14	28.57	65.52	42.86	57.58	69.23	81.25	66.67	78.57	100	52.17	50	100	78.95	62.5
DALRD3	HsaINT0044882	chr3:49016087-49016157	71	chr3:49016158-49016340=49015973-49016086:-	IR-S	2.04	87.68	4.29	50.48	5.45	79.02	8.41	64.3	6.05	89.32	2.13	73.04	8.17	78.4	6.71	0	64.54	3.76	67.13	15.45	68.91	30.82	86.38	18.53	79.64	28.91	81.8	10.5	85.13	3.11	51.33	34.71	75.44	22.39	73.97	30.62	67.15	33.09	83.72	42.59	79.69	38.34	78.85	39.71
DAPK3	HsaINT0044953	chr19:3961162-3963642	2481	chr19:3963643-3963669=3961009-3961161:-	IR-C	4.17	64.27	5	63.64	4.19	58.99	6.99	68.62	6.26	51.42	5.82	61.28	11.09	59.58	4.63	22.31	64.08	20.92	75.29	14.02	69.74	19.41	85.57	10.87	69.52	13.85	68.54	9.96	65.97	22.8	71.07	7.67	49.15	13.69	40.97	18.85	34.65	18.93	51.44	11.98	48.11	15.73	53.98	13.77
DAZAP1	HsaINT0045046	chr19:1422397-1425877	3481	chr19:1422348-1422396=1425878-1425960:+	IR-S	0.92	22.29	2.23	23.4	2.57	20.59	1.81	34.05	1.8	25.57	2.38	33.98	2.09	26.24	2.8	17.52	49.85	18.85	43.23	12.61	57.37	17.57	46.63	17.76	45.45	20.08	43.89	14.75	45.7	15.25	40.74	14.75	30.35	21.19	29.41	17.36	30.29	16.67	35.64	14.29	33.13	12.35	36.42	16.29
DBF4B	HsaINT0045082	chr17:44750678-44751939	1262	chr17:44750595-44750677=44751940-44752268:+	IR-S	88.24	100	100	100	100	100	84.62	100	100	100	93.1	100	100	100	100	91.3	100	92	100	100	100	100	100	100	100	100	100	84.21	100	92.31	100	100	100	100	100	100	100	100	100	87.5	100	100	100	100
DBF4B	HsaINT0045090	chr17:44731016-44732177	1162	chr17:44730965-44731015=44732178-44732265:+	IR-C	61.54	81.18	51.72	89.9	43.48	91.37	42.86	89.58	55.56	89.04	30.61	91.38	48.57	91.67	33.33	58.33	86.99	65	87.59	82.98	91.8	91.67	80.87	67.74	88.08	73.33	77.03	52.38	86.5	66.67	88.57	100	82.61	60	56.52	77.78	68.42	69.23	70.37	71.43	51.02	69.23	76.74	60
DBF4B	HsaINT0045091	chr17:44732266-44734089	1824	chr17:44732178-44732265=44734090-44734163:+	IR-C	45.1	72.22	28.36	81.43	52	74.01	39.39	80	56.86	77.64	27.27	85.92	29.03	72.58	50.94	55.26	82.72	70.73	85.96	68.12	83.11	57.14	85.31	67.16	74.42	58.62	79.51	57.65	82.76	60	88.68	68	44.12	58.82	57.33	53.33	62.79	62.96	68.12	81.82	79.66	73.33	65.22	50
DBR1	HsaINT0045154	chr3:138163859-138167080	3222	chr3:138167081-138167305=138163778-138163858:-	IR-C	4.35	50	0	11.11	0	33.33	2.7	69.23	5.66	10	20	29.41	9.68	20	4.76	53.85	55.56	66.67	100	33.33	63.64	11.11	66.67	9.09	33.33	30.43	0	33.33	41.18	33.33	100	0	23.08	20	12	14.29	9.09	5.88	14.29	4	14.29	18.52	4	5.26
DCAF10	HsaINT0045177	chr9:37857352-37860047	2696	chr9:37857241-37857351=37860048-37860193:+	IR-S	9.09	71.43	29.41	50	4.17	75	0	25	0	21.74	4.76	60	9.68	37.5	7.41	30.43	69.23	29.41	41.18	0	40.74	20	73.33	14.29	39.13	30.43	63.64	28.57	50	18.18	33.33	31.71	46.15	17.39	28	44.83	60	21.95	52.94	23.08	60	27.78	40	35
DCAF11	HsaINT0045179	chr14:24115393-24115542	150	chr14:24115285-24115392=24115543-24115726:+	IR-C	88.5	92.2	80.33	95.06	83.69	94.4	85.74	95.48	88.9	90.72	81.68	96.81	87.97	100	95.59	89.13	87.85	81.06	84.64	80.36	92.61	76.63	91.09	84.55	95.99	79.61	83.16	73.42	73.06	75.5	89.67	90.41	97.48	93.52	86.95	97.4	91.29	98.45	100	87.52	93.54	97	100	93.7
DCAF5	HsaINT0045255	chr14:69118279-69119193	915	chr14:69119194-69119230=69118139-69118278:-	IR-S	4.76	69.7	22.81	13.51	19.35	28.57	35.21	52.63	26.53	43.4	18.84	71.43	11.11	65.52	39.29	25.37	60.98	4.23	62.5	20.75	74.52	18.18	83.56	27.71	40	19.54	61.54	21.43	54.17	9.86	50	17.39	12.2	8.93	48.94	17.89	24.32	24.07	6.98	20	50	43.33	36	21.52
DCAF8	HsaINT0045287	chr1:160218969-160222650	3682	chr1:160222651-160222781=160218849-160218968:-	IR-S	18.6	78.23	15.75	82.86	20.29	81.92	17.19	90.12	21.91	83.51	24.44	87.23	35.54	84.03	31.43	46.45	81.9	40.48	81.92	41.77	87.14	37.6	85.75	40.18	77.49	41.3	82.51	49.61	83.64	39.69	83.33	28.51	59.09	36.19	61.11	34.67	58.02	32.32	65.85	43.01	56.86	34.86	67.48	23.93
DCTN4	HsaINT0045691	chr5:150731490-150731885	396	chr5:150731886-150731906=150731416-150731489:-	IR-C	100	100	0	100	100	100	100	100	100	100	100	100	100	100	100	32.2	85.29	40.48	100	58.33	63.86	18.1	82.14	31.82	100	23.81	83.61	45.21	100	31.82	100	5.37	39.39	5.41	20.86	10.3	12.28	2.96	9.09	5.8	29.13	3.01	17.36	5.54
DCUN1D2	HsaINT0045716	chr13:113484057-113490666	6610	chr13:113490667-113490708=113483840-113484056:-	IR-S	80.49	91.3	61.11	68	81.82	58.62	66.67	87.5	54.29	93.1	46.15	82.61	66.67	100	78.72	65.85	77.78	75	84.62	63.64	81.08	71.88	89.47	64.71	94.44	68	88	51.85	67.74	61.11	90.48	65.62	82.35	78.95	100	71.43	79.31	67.09	91.11	73.77	93.55	78.12	70	72.15
DCUN1D2	HsaINT0045719	chr13:113461137-113474123	12987	chr13:113474124-113474254=113461054-113461136:-	IR-S	4.76	80	12.5	39.39	27.27	80	5.26	74.07	40	50	25	58.82	18.75	56.52	36	20	77.78	50	72.41	33.33	75	50	62.5	0	25	16.67	57.89	33.33	41.18	30.43	90.48	0	63.64	13.04	25	9.09	26.32	0	45.45	0	33.33	0	77.78	5.88
DCUN1D4	HsaINT0045731	chr4:51886639-51891759	5121	chr4:51886568-51886638=51891760-51891851:+	IR-S	4.76	75	2.7	24.14	2.22	33.33	2.22	42.86	7.04	23.08	1.82	50	2.04	33.33	2.7	27.66	31.71	28.57	37.93	6.38	20	15.49	38.46	6.25	24.44	13.51	23.53	16.67	31.82	27.27	43.75	2.91	6.98	2.56	5.66	2.5	13.04	4.08	4.17	10.26	5.56	8.43	1.89	1.27
DCXR	HsaINT0045749	chr17:82037548-82037630	83	chr17:82037631-82037697=82037450-82037547:-	IR-C	15.71	38.7	8.43	47.34	10.73	32.88	10.41	26.27	26.67	37.57	19.7	37.06	7.54	40.48	14.56	12.55	41.84	17.79	41.37	13.05	38.07	17.68	63.16	11.9	25.25	16.74	46.33	20.08	45.81	18.01	51.46	26.47	32.15	23.91	34.58	19.61	42.79	24.39	55.2	15.03	29.85	23.15	40.22	17.82
DDB2	HsaINT0045792	chr11:47215264-47216335	1072	chr11:47214942-47215263=47216336-47216472:+	IR-S	8.46	67.97	9.91	61.19	9.51	60.4	13	69.11	10.08	67.07	11.84	78.06	9.65	64.62	18.48	16.87	49.26	20.22	55.6	14.21	52.78	14.89	44.66	18.33	43.24	16.2	53.05	17.54	47.79	14.78	51.34	8.7	38.46	10	20	14.29	57.89	28.57	9.09	4.35	29.41	8.7	29.41	7.41
DDB2	HsaINT0045796	chr11:47234673-47234756	84	chr11:47234573-47234672=47234757-47234934:+	IR-S	1.19	25.83	1.3	16.7	2.61	26.93	2.7	14.29	3.95	27.27	9.28	16.73	2.47	25.4	5.08	3.94	11.55	4.04	18.29	3.7	24.62	8.91	36	11.58	29.32	5.81	25	6.44	19.06	2.88	11.74	0	64.71	20	42.86	100	69.23	60	55.56	12.5	84.62	25	50	25
DDB2	HsaINT0045797	chr11:47234935-47235269	335	chr11:47234757-47234934=47235270-47235412:+	IR-S	9.8	63.79	12.28	75.45	2.79	76.83	16.18	81.51	7.91	80.21	16	78.14	8.75	77.1	21.05	21.92	69.06	20.47	66.67	22.03	71.31	31.76	86.78	20	56.92	15.28	71.71	17.22	61.95	19.46	58.7	100	73.33	33.33	100	26.32	72.73	22.22	85.71	55.56	64.71	33.33	57.14	44.44
DDB2	HsaINT0045798	chr11:47235413-47237836	2424	chr11:47235270-47235412=47237837-47238001:+	IR-S	18.89	76.95	16.87	82.41	12.11	78.56	11.36	90.65	9.68	74.61	19.66	83.92	18.1	76.61	31.85	27.27	73.09	24.14	81.76	23.89	78.04	19.64	73.42	21.15	60.48	23.53	73.33	20.83	77.48	24.17	72.16	33.33	80	77.78	85.71	63.64	72.73	75	83.33	35.48	60	17.24	78.57	50
DDHD2	HsaINT0045844	chr8:38245951-38246232	282	chr8:38245742-38245950=38246233-38246300:+	IR-S	9.09	75	100	71.43	0	76	23.08	92.86	18.18	70.73	23.08	73.33	17.65	92.31	25	10.81	69.23	13.79	58.62	14.29	72	18.75	68	16.13	58.33	17.81	55.56	11.69	54.72	25	50	21.74	46.67	20	42.86	15.38	18.52	16.13	46.34	10	69.23	13.64	51.52	9.8
DDRGK1	HsaINT0045905	chr20:3191239-3191764	526	chr20:3191765-3191821=3191190-3191238:-	IR-S	9.43	84.03	12.94	78.42	14.56	80.9	23.89	83.16	11.73	63.96	18.37	83.63	9.79	66.67	18.66	70	90.26	68.28	90.32	34.03	86.89	31.4	79.73	40.68	69.23	42.08	87.07	51.45	82.96	60.27	89.25	9.7	28.7	11.31	28.57	28.18	50.75	9.09	22.47	14.68	39.76	12.6	31.68	15.29
DDX25	HsaINT0046101	chr11:125921380-125922819	1440	chr11:125921191-125921379=125922820-125923110:+	IR-C	6.12	60.92	2.97	54.29	9.76	62.07	8.11	72.73	9.86	76.19	9.21	68.25	10.84	50	7.55	10	66.67	37.5	100	6.67	60	14.29	60	33.33	0	14.29	23.08	33.33	33.33	38.46	81.82	1.75	28.57	6.25	24	11.11	26.09	0	25.93	4.23	15.56	6.67	41.67	4.55
DDX26B	HsaINT0046110	chrX:135521104-135521240	137	chrX:135520630-135521103=135521241-135521318:+	IR-S	23.81	41.67	12	52.94	27.27	65.22	0	44.44	42.86	35.48	18.18	46.67	5.88	55.56	3.45	13.64	38.46	10.34	15.38	30	51.43	59.18	50.65	58.33	27.59	28.89	49.15	26.09	32.14	20.83	40.54	25	35.59	19.4	42.22	20.51	35.59	19.27	38.71	33.33	29.73	30.16	45.76	26.32
DDX26B	HsaINT0046111	chrX:135569432-135572814	3383	chrX:135569337-135569431=135572815-135573033:+	IR-S	14.29	86.67	100	85.71	33.33	100	60	100	0	100	100	100	100	100	46.67	71.43	83.33	23.08	75	33.33	86.67	50	100	81.82	100	66.67	100	42.86	54.55	50	41.94	50	87.76	83.33	84.62	66.67	63.64	57.89	72.73	71.43	70	71.43	84.62	42.86
DDX26B	HsaINT0046115	chrX:135577428-135579787	2360	chrX:135577193-135577427=135579788-135580162:+	IR-S	0	31.43	14.29	50	100	45.45	0	42.86	11.11	41.67	0	28.57	14.29	27.27	18.18	50	68.42	15.79	71.43	33.33	65.85	6.67	40.98	22.22	26.53	23.08	36.84	16.67	65.96	11.11	37.78	5.88	29.91	16.13	27.54	13.51	20	5.26	35	12	32.31	13.51	29.41	5.88
DDX27	HsaINT0046129	chr20:49235089-49236149	1061	chr20:49234935-49235088=49236150-49236231:+	IR-S	4.2	56.3	7.06	46.85	4.55	53.85	3.82	47.47	4.07	59.26	4	48.98	5.1	54	6.72	10.24	58.62	9.77	42.86	12.82	67.27	13.29	81.03	10.64	56.25	9.09	72.04	12.59	55.56	13.27	41.28	28.95	68.09	31.96	58.88	31.51	63.38	20.75	71.43	16.52	75.21	27.82	63.93	12.28
DDX31	HsaINT0046154	chr9:132618442-132625663	7222	chr9:132625664-132625745=132618330-132618441:-	IR-S	7.69	57.69	16.13	34.88	7.14	45.45	25.93	53.33	19.15	42.86	12.82	38.1	18.75	77.36	9.68	63.64	84	63.64	74.47	17.07	56.16	48.15	58.14	20	40.54	17.86	41.67	37.93	63.16	63.64	81.4	14.29	38.46	11.11	27.27	3.45	40.74	0	4.76	0	37.5	0	24.32	20
DDX42	HsaINT0046261	chr17:63798100-63799588	1489	chr17:63798038-63798099=63799589-63799625:+	IR-S	11.96	76.51	11.47	56.5	8.91	61.19	19.64	51.07	16.06	68.18	11.96	52.14	15.64	52	20.33	29.1	51.36	25.78	58.93	20.56	54.1	15.38	59.27	17.79	44.83	20.42	41.78	20.49	53.85	20.77	50.24	16.85	33.33	14.29	32.72	17.5	36.5	21.8	38.85	11.18	38.36	18.19	37.04	10.15
DDX42	HsaINT0046262	chr17:63799626-63800467	842	chr17:63799589-63799625=63800468-63800617:+	IR-S	9.68	67.5	12.09	78.02	9.41	67.93	20.16	65.35	13.72	75.56	23.11	59.94	21	77.68	16.96	30.35	64.19	25.21	64.2	21	69.82	25.37	68.6	23.96	57.3	21.56	59.81	24.85	58.49	23.18	53.12	13.68	50.92	15.53	37.18	18.3	33.77	19.97	35.16	24.9	28.55	13.62	40.38	21.73
DDX47	HsaINT0046313	chr12:12823320-12823869	550	chr12:12823203-12823319=12823870-12824016:+	IR-C	4.92	68.42	2	57.75	2.41	72.15	2.38	79.75	4.58	62.22	7.18	58	5.56	61.8	3.07	15.6	70.54	21.05	70.59	14.56	71.43	15.66	77.14	10	46.94	9.68	72.6	12.12	58.73	20.99	80.82	24.14	52	26.67	50	8.11	77.78	21.74	53.19	0	60.87	28.57	43.48	13.04
DDX5	HsaINT0046330	chr17:64500774-64502009	1236	chr17:64502010-64502069=64500549-64500773:-	IR-S	27.56	96.29	30.96	93.31	24.38	92.52	34.21	96.46	30.41	94.3	39.91	96.93	41.71	96.41	53.2	49.39	82.65	30.34	75.5	35.66	82.91	35.53	87.69	31.77	68.11	34.41	77.14	45.49	83.54	40.09	80.37	38.77	71.62	38.13	68.13	45.64	72.6	38.12	70.96	40.07	71.46	39.78	75.67	39.84
DDX5	HsaINT0046331	chr17:64500327-64500548	222	chr17:64500549-64500773=64498256-64500326:-	IR-S	9.23	38.32	13.47	46.17	9.74	38.52	13.61	44.65	11.67	41.69	13.66	41.65	14.4	41.97	18.13	20.45	54.22	15.2	54.44	13.67	33.86	11.22	37.83	10.98	29.05	12.45	34.85	15.97	37.94	17.71	56.64	12.42	30.7	12.1	29.42	11.72	24.9	11.95	30.56	11.2	26.84	10.89	28.55	10.47
DDX51	HsaINT0046363	chr12:132141957-132142118	162	chr12:132142119-132142190=132141850-132141956:-	IR-S	0	15.92	0	14.3	2.22	21.53	2.63	15.11	0	24.27	4.23	25.79	3.89	16.11	5.8	23.71	61.87	1.98	28.95	16.47	41.32	15.66	29.11	9.46	33.57	2.26	40.4	5.88	32.24	30.62	70.66	2.63	35.44	5.8	34.49	15.41	51.17	2.63	29.08	13.09	41.39	8.93	45.99	2.07
DDX51	HsaINT0046364	chr12:132141607-132141849	243	chr12:132141850-132141956=132141498-132141606:-	IR-S	8.33	70.08	6.25	69.72	9.8	72.85	15	81.89	3.85	77	19.23	84.47	8.7	79.39	29.41	25	96.18	14.89	82.57	25.71	93.17	13.92	84.55	14.71	81.38	29.79	86.93	30.77	91.06	36	91.96	23.08	77.57	13.04	58.76	13.79	92	21.43	72.63	16.22	77.4	29.27	79.1	17.24
DDX51	HsaINT0046366	chr12:132141021-132141274	254	chr12:132141275-132141420=132140831-132141020:-	IR-S	19.05	95.21	0	14.78	7.87	93.49	9.38	60.96	18.31	92.13	37.78	96.27	14.81	96.32	30.61	31.58	97.33	1.33	16.86	27.87	87.2	12	51.19	18.31	83.33	18.52	83.03	21.74	93.26	31.58	90.52	15.79	62.9	1.89	5.73	22.08	82.56	7.04	42.45	9.09	60	11.71	68.7	15.07
DDX55	HsaINT0046402	chr12:123602257-123605930	3674	chr12:123602125-123602256=123605931-123605981:+	IR-C	9.09	29.73	8.7	41.18	10.77	53.85	2.94	25.58	18.52	66.67	17.65	44.44	7.69	40	14.29	47.06	60	42.86	69.49	42.22	51.85	27.66	30.86	30.61	62.71	23.64	42.31	32.08	34.48	45.45	61.4	52	60	39.53	41.18	47.37	35.48	28.89	44.83	46.34	55.56	35.14	42.86	37.5
DDX55	HsaINT0046404	chr12:123617873-123618668	796	chr12:123617758-123617872=123618669-123618837:+	IR-C	7.69	50.72	10.34	56	9.68	44.19	9.59	58.23	17.89	56.83	16.98	53.74	15.6	45.65	10.28	15.38	45.22	23.97	40.4	22.22	46.67	18.7	50	20.51	49.15	18.88	51.55	13.16	41.29	23.36	45.99	15.15	37.21	14.63	60	12.73	32.65	41.18	40.35	17.81	44.33	28.12	43.8	20
DDX55	HsaINT0046407	chr12:123605982-123606072	91	chr12:123605931-123605981=123606073-123606159:+	IR-S	1.23	27.27	2.04	25.49	9.33	32	0	23.53	8.47	41.46	4.11	18.18	5.88	25.93	4.35	33.33	38.89	25.58	46.15	22.73	45.45	5	39.13	33.33	36.17	8.33	29.73	6.45	38.46	38.46	54.39	41.18	41.18	26.67	60	5.26	23.08	7.69	28	15.79	68.42	15.15	35.29	14.29
DDX55	HsaINT0046409	chr12:123607524-123607599	76	chr12:123607432-123607523=123607600-123607662:+	IR-S	15.15	40.62	12.33	54.22	9.3	55.93	12.36	73.13	11.11	53.98	18.84	41.86	15.15	57.69	16.67	39.73	59.49	42.03	62.5	35.14	64.71	25.33	69.23	27.78	56.99	25.71	53.66	32.31	61.19	32.2	59.52	11.76	62.16	16.28	65.85	31.71	50	23.08	65.71	27.78	51.22	28.81	57.45	39.39
DDX55	HsaINT0046410	chr12:123607663-123608679	1017	chr12:123607600-123607662=123608680-123608829:+	IR-S	7.22	41.73	7.04	45.28	8	33.77	2.94	36	5.08	31.34	10	28.21	8.53	41.46	13.18	39.33	67.74	39.33	56.67	22.31	46.73	24.73	41.73	16	35.63	15.79	26.24	37.25	50.39	45.1	55.38	22.39	35.8	13.79	28.74	15.91	40.43	11.86	18.92	13.85	26.83	7.87	32.74	13.43
DECR2	HsaINT0046568	chr16:406398-407424	1027	chr16:406346-406397=407425-407560:+	IR-C	15	82.76	31.43	84.27	27.78	79.17	30.77	89.61	31.71	80.56	30.77	84.81	14.89	78.79	31.58	42.86	75	40.74	70.49	29.17	91.87	20.83	92.11	26.32	70.79	42.31	77.24	41.18	79.31	52	70.73	33.33	61.7	58.97	68.83	34.48	82.35	29.03	78.57	7.41	78.82	46.43	71.21	22.73
DECR2	HsaINT0046569	chr16:407561-410242	2682	chr16:407425-407560=410243-410367:+	IR-S	13.21	43.12	25.71	48.08	25	39.05	22.22	49.59	20	52.17	23.08	45	36.67	65.38	37.5	43.48	53.25	26.92	56.63	20.69	37.17	11.11	27.89	37.5	21.8	42.86	32.39	25	40.74	45.45	57.58	9.09	33.33	13.04	20.41	14.89	23.48	25.93	10.74	16.36	25.37	29.17	22.99	21.21
DEDD	HsaINT0046574	chr1:161130848-161132390	1543	chr1:161132391-161132466=161130815-161130847:-	IR-C	27.23	60	20	100	14.29	100	11.11	100	37.5	20	33.33	71.43	40	66.67	23.08	60	0	69.23	33.33	50	66.67	42.86	57.83	63.64	33.33	21.74	33.33	66.67	55.56	53.85	57.83	25	42.86	28	86.43	26.32	27.27	42.86	27.27	28	60	33.33	75	19.17
DEF8	HsaINT0046596	chr16:89963444-89964169	726	chr16:89963363-89963443=89964170-89964310:+	IR-C	15.15	74.68	14.29	73.75	7.32	76.22	14.29	77.78	10.64	65.71	7.69	72.73	12.5	68.91	21.31	17.07	81.42	24	68.37	31.58	72.7	21.74	80.65	13.73	67.38	22.45	67.42	21.05	80.29	20.63	70.24	16.67	65.41	22.22	64.65	21.43	57.36	30.3	65.71	16.92	67	29.73	58.87	12.28
DENND4C	HsaINT0046881	chr9:19369988-19371755	1768	chr9:19369837-19369987=19371756-19371820:+	IR-S	0	29.41	7.14	33.33	9.09	53.85	9.09	38.46	3.23	28.21	2.86	29.41	7.14	30	14.29	44.44	86.21	47.17	65.22	25	48.84	30	36.36	27.27	36.84	44.83	50	30.43	46.67	50	73.33	9.09	22.22	26.32	13.04	27.27	16.67	23.08	10.34	9.09	26.32	0	21.74	7.69
DENND4C	HsaINT0046882	chr9:19371821-19372036	216	chr9:19371756-19371820=19372037-19374141:+	IR-S	0	21.43	5.88	14.29	0	38.46	10.34	47.06	3.23	35.29	0	4.76	4.55	47.37	2.7	48.15	68.75	33.33	69.23	14.29	44.83	13.04	42.86	16.13	14.29	3.03	57.89	7.14	25.93	42.11	35.29	50	23.08	7.14	9.09	7.69	23.08	0	4.76	16.67	9.09	0	28	20
DENND5A	HsaINT0046898	chr11:9145114-9145669	556	chr11:9145670-9145815=9144995-9145113:-	IR-C	4.76	63.86	6.67	65.45	3.66	58.7	2.62	69.51	1.92	62.96	3.18	69.81	7.48	72.04	9.93	23.42	77.26	26.46	77.27	14.73	59.16	11.32	62.5	6.53	36.56	13.38	59.26	13.54	65.61	15.97	79.84	13.33	41.67	10.7	44.87	5.73	36.56	7.41	55.1	7.51	50	8.64	47.62	6.09
DENND5B	HsaINT0046927	chr12:31447770-31451939	4170	chr12:31451940-31452476=31447538-31447769:-	IR-C	50	57.14	36.36	33.33	58.33	33.33	41.94	53.85	29.73	55.56	36	20	55.56	38.46	51.02	29.41	30.77	37.37	38.46	25.3	12.73	12.64	27.27	8.05	20.75	9.84	17.86	17.86	26.67	30.28	42.86	1.59	0	1.96	9.09	9.52	25	2.27	20	1.45	11.11	2.97	3.23	4.55
DEPDC5	HsaINT0046995	chr22:31873333-31874272	940	chr22:31873255-31873332=31874273-31874405:+	IR-S	17.65	73.33	10	27.27	9.09	41.18	6.67	50	5.88	71.43	6.67	87.5	14.29	100	0	8.33	100	33.33	56.52	28.57	40	16.67	64.71	21.74	39.13	6.67	66.67	12.5	66.67	14.29	46.15	20	40	17.65	33.33	55.56	50	25	55.56	27.27	22.22	50	60	40
DET1	HsaINT0047061	chr15:88513141-88516781	3641	chr15:88516782-88516973=88512483-88513140:-	IR-S	4	64.71	14.29	66.67	2.56	60	4.35	14.29	11.11	54.55	14.29	73.33	6.67	55.56	6.98	20.48	46.34	15.56	28.57	5.62	26.83	3.7	17.95	5.05	14.81	2.94	44.44	16.13	23.4	12.36	29.82	3.33	12.2	0	16.67	4	4.35	2.33	5	3.9	6.12	0	9.09	1.54
DET1	HsaINT0047064	chr15:88531474-88531612	139	chr15:88531613-88531715=88530623-88531473:-	IR-S	56.52	77.78	50	83.33	78.57	64.71	61.54	33.33	64.1	75	84.62	52.94	60	100	57.58	65.62	61.29	69.62	81.82	56.16	64.52	47.22	71.43	52.38	63.64	58.9	84	50	53.49	60	70.83	90	92.59	83.67	81.82	92	50	76.27	75	76.19	64.71	75.61	68.75	86.67
DFFA	HsaINT0047067	chr1:10461703-10463057	1355	chr1:10463058-10463209=10460546-10461702:-	IR-S	23.7	34.78	21.64	38.2	21.8	34.78	26.59	37.29	24.92	44.94	30.9	47.54	24.52	35.95	16.46	9.93	28.12	11.7	28.07	17.65	31.88	29.58	37.25	31.03	28.89	18.82	43.4	9.71	24.53	8.29	17.31	27.56	51.72	38.93	47.69	28.77	38.03	33.33	53.85	30.77	41.54	33.33	51.28	27.52
DFFB	HsaINT0047072	chr1:3858845-3865811	6967	chr1:3858718-3858844=3865812-3866000:+	IR-S	5.56	63.64	12.82	61.9	10	68.42	20.75	35.71	17.95	76.47	8	60	5.26	55.56	7.14	77.78	83.33	54.55	53.85	12.5	71.43	44.44	54.55	33.33	55.56	41.18	60	38.46	45.45	30.43	66.67	55	77.78	27.78	75	47.06	55.56	15.79	29.41	18.18	63.64	39.13	57.89	66.67
DFFB	HsaINT0047073	chr1:3866001-3867973	1973	chr1:3865812-3866000=3867974-3868053:+	IR-C	0	16.67	0	0	13.04	41.67	0	23.81	0	17.65	0	18.52	14.29	17.65	9.09	9.09	0	25	37.5	20	11.11	25	65.22	25	42.86	12.5	30.43	8.33	7.69	0	14.29	27.27	20	11.76	33.33	3.23	5.26	18.52	20	2.7	22.22	11.11	15.56	3.45
DFNA5	HsaINT0047083	chr7:24706377-24708126	1750	chr7:24708127-24708254=24706184-24706376:-	IR-S	100	60	11.11	100	0	37.5	16.67	60	42.86	100	36	33.33	20	33.33	45.45	25.37	60	28.81	58.33	5.45	50	15.66	57.14	20	52.73	19.48	40.91	20.59	26.32	18.99	36.51	19.61	34.62	22.31	21.88	19.1	24.68	16.31	25.37	17.11	46.15	15.38	35.14	13.11
DFNB31	HsaINT0047093	chr9:114425025-114426210	1186	chr9:114426211-114426413=114424988-114425024:-	IR-C	26.61	85.57	39.71	90.34	25.08	76.04	42.62	100	33.96	88.8	52.38	79.41	48.78	95.02	48.78	48.78	72	27.65	74.65	69.73	88.72	58.21	67.14	43.35	69.57	54.21	92.11	54.84	66.49	45.23	84.39	13.85	29.41	42.47	57.14	31.15	71.62	9.26	100	22.22	47.5	31.71	56.25	22.94
DGAT1	HsaINT0047110	chr8:144317110-144317186	77	chr8:144317187-144317252=144317022-144317109:-	IR-S	14.33	86.94	9.54	91.71	14.34	81.55	16.35	82.71	14.81	84.84	26.42	91.38	17.68	87.44	26.97	27.59	85.53	56.12	91.17	21.96	86.2	20.94	85.66	29.28	70.61	27.63	87.7	28.55	77.57	33.22	81.94	15.47	71.85	38.32	69.63	23.19	68.1	19	74.09	24.43	71.58	7.32	71.51	13.93
DGCR8	HsaINT0047169	chr22:20086684-20087161	478	chr22:20085687-20086683=20087162-20087321:+	IR-C	2.97	43.25	10	43	6.81	43.33	7.79	58.6	8.33	49.04	7.48	45.98	9.6	55.92	16.47	30.61	49.83	23.08	46.25	23.15	46.11	11.84	37.32	15.87	41.57	20.62	46.92	18.64	40.72	31.03	61.23	15.62	54.59	18.87	50	13.89	49.25	23.21	60	23.27	52.51	17.05	64.71	12.44
DGCR8	HsaINT0047171	chr22:20089812-20089975	164	chr22:20089669-20089811=20089976-20090258:+	IR-S	8.33	64.21	13.67	71.43	10.43	61.19	18.07	71.21	14.69	66.31	18.18	72.13	18.97	62.09	19.19	59.14	88.84	46.84	91.87	27.89	74.75	29.2	63.76	24.53	64.35	26.25	63.64	33.98	73.42	57.14	88.6	12.5	52.94	13.89	43	15.62	46.05	20	45.82	25.66	53.66	15.56	55.81	18.06
DGKD	HsaINT0047227	chr2:233445763-233446711	949	chr2:233445623-233445762=233446712-233446796:+	IR-S	9.09	16.67	13.04	31.58	5	39.13	13.04	40.74	8.33	31.31	16.67	32.67	9.09	35.29	10.34	28.3	42.66	20.93	57.58	24	52.27	20.55	58.42	19.15	60.68	13.85	59.44	11.11	55.56	16	46.76	4.5	34.69	6.67	32.14	3.23	23.81	3.61	24.14	7.04	12.5	2.56	22.03	8.82
DGKD	HsaINT0047228	chr2:233446797-233448086	1290	chr2:233446712-233446796=233448087-233448181:+	IR-S	11.11	70	6.25	78.08	4.76	78.79	10.53	72.5	8.57	67.44	15.38	80.82	11.11	76	22.22	39.29	86.92	33.33	83.18	46.67	86.29	21.74	86.67	34.69	62.38	23.46	75	24.44	85.45	30.91	86.81	4.55	23.81	10.11	41.67	8.57	25.93	7.69	25.93	1.23	28.89	1.12	28.89	6.52
DGKE	HsaINT0047259	chr17:56845810-56847921	2112	chr17:56845690-56845809=56847922-56848065:+	IR-S	20	33.33	14.29	33.33	25	57.14	7.69	23.08	11.11	61.11	42.86	65.22	16.67	75	4.35	42.86	42.86	11.11	25	12.5	23.08	33.33	0	9.09	42.86	20	33.33	20	33.33	100	60	7.69	0	16.67	33.33	9.09	42.86	0	20	0	33.33	0	0	27.27
DGKQ	HsaINT0047384	chr4:966079-966465	387	chr4:966466-966527=965928-966078:-	IR-S	33.33	56.38	38.46	67.19	40	67.4	42.86	85.53	15.79	75.88	42.86	83.15	25	71.23	26.32	14.29	55.4	0	53.63	50	48.69	19.77	50.38	33.33	41.73	14.29	45.18	17.65	48.5	16.67	56.13	15.38	30.79	11.76	37.76	10.2	46.6	11.69	41.6	7.14	42.38	13.04	34.26	2.13
DGKQ	HsaINT0047385	chr4:965530-965927	398	chr4:965928-966078=965491-965529:-	IR-S	0	73.94	0	76.39	31.37	77.9	48.91	89.05	0	74.8	100	90.26	10	73.2	33.33	11.55	75.69	13.22	82.21	26.12	80.58	20.71	82.01	44.59	84.53	0	79.31	5.41	89.11	48.68	78.53	10.83	74.68	30.21	82.07	24.61	85.38	29.38	79.19	35.68	73.32	34.4	74.12	22.87
DGKQ	HsaINT0047387	chr4:963291-965175	1885	chr4:965176-965291=963139-963290:-	IR-S	4	90.78	2.22	88.54	7.69	91.7	0	92.44	8.11	94.04	25	96.74	6.67	89.42	20.93	2.44	91.61	16.67	89.06	23.53	92.74	20	92.51	15.79	91.53	47.83	87.43	16.67	92.31	23.08	79.07	23.81	83.73	34.69	81.51	23.64	82.22	21.31	87.93	16.98	84.86	21.95	90.85	16.92
DHODH	HsaINT0047491	chr16:72017107-72021123	4017	chr16:72017024-72017106=72021124-72021311:+	IR-S	10.2	64	9.68	92.31	3.03	53.12	6.31	48.24	9.3	59.32	14.29	69.01	1.45	52.94	10.84	21.88	57.14	22.08	59.32	10	43.75	26.76	64.71	21.57	42.42	14.29	53.49	17.81	50	25	56.67	16.13	71.43	33.33	44.44	33.33	42.86	30.77	36.36	42.86	44.44	2.86	58.33	29.17
DHODH	HsaINT0047492	chr16:72021312-72022361	1050	chr16:72021124-72021311=72022362-72022475:+	IR-S	6.9	59.52	8.26	53.62	3.17	52	5.05	45.83	5.26	44.62	8.11	39.24	8.43	35.63	11.11	22.22	43.33	26.83	39.73	13.82	42.19	10.11	43.59	8.86	36.54	10.11	36.59	17.14	59.32	12.82	36.51	26.92	51.52	18.92	40.54	11.54	23.81	15	36.84	7.14	39.39	14.29	38.1	14.29
DHODH	HsaINT0047493	chr16:72022476-72023164	689	chr16:72022362-72022475=72023165-72023318:+	IR-S	13.89	55.93	9.24	57.28	3.95	55.79	4.07	61.34	6.19	73.91	1.75	45.83	9.4	76.27	8.74	14.58	36.45	17.76	37.25	15.97	55.56	15.38	60	23.53	41.59	18.18	29.31	27.78	41.75	13.4	36.36	4.76	74.19	15.25	63.64	18.64	30.23	12.28	53.33	21.31	50	11.11	46.67	7.25
DHRS1	HsaINT0047507	chr14:24292331-24292651	321	chr14:24292652-24292784=24292184-24292330:-	IR-S	3.95	86.13	9.39	88.57	6.85	98.01	9.48	87.36	39.03	88.6	9.06	82.39	21.44	93.46	37.9	52.73	92.23	10.02	79.04	37.97	79.12	27.14	80.23	33.69	86.61	28.68	88.57	41.09	80.62	36.43	83.44	18.67	55.78	36.02	62.42	28.34	75.27	14.87	67.05	30.47	66.75	19.42	90.87	13.2
DHRS11	HsaINT0047512	chr17:36592157-36594970	2814	chr17:36591796-36592156=36594971-36595180:+	IR-S	5.17	67.06	13.25	67.57	5.97	71.19	16.48	73.47	14.29	81.44	11.54	75.82	14.81	78.18	9.22	14.29	61.11	19.4	64.1	16.92	64.81	20.83	83.33	24.14	50	16.67	42.86	11.48	68	10.84	63.16	17.65	53.49	27.27	57.89	35.63	37.5	34.78	70	21.62	43.4	33.33	46.67	29.41
DHRS11	HsaINT0047513	chr17:36595181-36598162	2981	chr17:36594971-36595180=36598163-36598257:+	IR-S	7.69	42.86	7.59	62.41	7.04	51.91	7.69	50	13.64	70.29	4.19	52.05	6.15	47.69	11.59	18.03	55.56	21.13	40	7.37	57.69	27.27	58.62	17.24	56.25	24.21	53.25	13.43	50	6.67	43.75	22.39	45.1	28.74	60	14.29	40.43	25	57.69	30.16	42.57	12.28	56.52	22.22
DHRS11	HsaINT0047515	chr17:36599051-36599670	620	chr17:36598921-36599050=36599671-36599763:+	IR-S	6.75	56.25	10.74	58.54	17.65	59.49	13.64	55.06	19.01	67.18	10.71	65.16	6.76	59.52	3.85	21.57	52.94	25.49	62.5	25.33	63.36	33.33	65.08	20	64.71	32.14	63.93	11.69	60.47	12.12	56.16	28.12	42.42	33.33	64.15	34.12	65.52	35.38	60.66	39.29	67.16	25.42	76.47	24.59
DHRS11	HsaINT0047516	chr17:36599764-36599971	208	chr17:36599671-36599763=36599972-36600037:+	IR-S	12	40.93	10.45	29.76	15.28	30.26	13.7	30.39	12.62	44.58	16.92	36.84	8.15	26.19	8.27	9.09	43.48	26.15	39.13	14.29	46.38	20	55.17	16.67	37.14	23.33	36.36	10.14	55.56	23.08	22.39	16.22	43.24	29.41	58.88	53.19	51.85	35.71	64.18	28.12	57.5	46.94	57.58	28.3
DHRS12	HsaINT0047521	chr13:51777122-51790010	12889	chr13:51790011-51790092=51777060-51777121:-	IR-S	54.1	91.56	13.58	68.25	11.6	61.4	26.12	82.63	10.83	90.01	41.42	83.91	70.21	86.84	45.21	76.74	70.34	34.96	74.07	16.81	64.18	45.21	100	20.75	67.24	46.36	65.35	65.69	100	45.21	86.84	60.62	89.96	45.21	48.53	32.04	48.78	25.53	70.21	65.35	56.45	32.04	81.48	43.18
DHRS12	HsaINT0047522	chr13:51774035-51777059	3025	chr13:51777060-51777121=51773930-51774034:-	IR-S	18.18	57.14	7.14	25	0	58.33	18.52	57.58	29.41	46.67	25	71.43	5.88	46.15	77.78	52.38	81.82	44.44	69.7	29.41	56.36	27.27	25.93	20	57.89	13.33	50	28	62.5	27.27	57.14	20	40	25	48.57	28	60	17.65	37.14	25	52.63	17.65	34.69	23.81
DHRS12	HsaINT0047523	chr13:51771912-51773929	2018	chr13:51773930-51774034=51771821-51771911:-	IR-S	11.11	25.93	27.27	35.29	22.58	44.44	42.86	33.33	20	45.45	36.36	37.5	28	22.73	10	23.81	40	10.34	33.33	4	30.23	16.67	63.64	14.29	16.28	29.41	42.86	21.21	60	20	83.33	28	29.41	21.43	30.77	22.22	46.67	30	42.86	25	13.04	7.69	16.67	20
DHRS13	HsaINT0047525	chr17:28902702-28902817	116	chr17:28902818-28903071=28902583-28902701:-	IR-S	8	42.86	10.64	12	1.96	25	0	33.33	9.52	100	14.29	40	7.32	100	8.43	15	16.13	16.28	11.11	6.93	27.27	11.11	27.27	17.46	12.73	38.46	45.45	0	27.27	9.09	0	30.3	25.33	16.05	22.67	22.08	24.29	26.05	29.67	34.75	32.47	18.37	33.33	18.42
DHX15	HsaINT0047616	chr4:24537174-24540107	2934	chr4:24540108-24540299=24537051-24537173:-	IR-C	7.48	50.23	4.58	33.89	7.72	37.02	6.58	40	6.51	42.97	8.54	40	8.66	55.56	10.3	22.25	42.25	21.39	53.05	13.26	45.83	18.3	51.35	12.18	38.76	11.68	44.63	10.76	40.98	21.18	40.07	11.32	33.33	20.6	34.38	18.09	28.41	18.29	29.41	19.29	32.77	18.3	43.38	15.57
DHX33	HsaINT0047689	chr17:5461110-5462318	1209	chr17:5462319-5462546=5460939-5461109:-	IR-C	9.09	89.74	10.9	72.04	8.25	62.32	9.8	72.73	12.57	81.4	10.7	80	20.59	78.26	20.37	31.58	42.31	23.91	44.26	33.33	70.25	21.1	59.38	28	64.21	17.46	58.21	31.65	53.57	22.22	44.68	17.86	57.14	36.59	61.54	47.54	68.42	25.42	77.78	20	59.18	15.66	63.64	25.71
DHX34	HsaINT0047696	chr19:47349353-47352753	3401	chr19:47349281-47349352=47352754-47353735:+	IR-C	33.33	43.66	23.08	28.46	21.43	31.31	26.32	27.03	29.03	36	21.57	39.57	46.15	42.5	29.41	5.26	7.04	0	16.83	22.22	10.94	14.89	12.82	12.5	20.83	7.14	8.51	7.69	22.73	4.76	14.67	11.11	25	13.51	13.04	6.67	9.09	18.52	23.53	9.68	14.29	21.21	14.29	15.38
DHX34	HsaINT0047702	chr19:47380993-47381185	193	chr19:47380816-47380992=47381186-47381324:+	IR-S	4.23	82.38	6.33	77.44	7.53	72.82	13.04	80.11	9.09	71.53	10.64	84.83	11.36	81.65	9.68	14.29	89.62	36.36	89.6	10.2	84.29	15.29	76.69	10	70.47	14.75	71.21	16.67	83.09	31.58	87.5	6.06	60.75	16.98	69.35	11.54	70.73	8.91	61.43	9.09	51.25	7.5	57.29	3.03
DHX34	HsaINT0047703	chr19:47381325-47381979	655	chr19:47381186-47381324=47381980-47382704:+	IR-S	2.61	59.09	4.35	64.19	3.76	63.81	8.74	78.79	5.75	66.32	5.56	75	13.64	71.09	9.76	44.19	97.41	26.92	91.61	17.86	72.56	5	61.84	17.24	44.86	12.36	66.01	25	72.15	47.06	89.47	9.38	51.25	10.14	50	18.52	53.96	1.79	53.64	4.76	37.08	8.96	47.12	4.76
DHX35	HsaINT0047721	chr20:39023768-39025229	1462	chr20:39023690-39023767=39025230-39025359:+	IR-S	5.88	63.64	14.29	61.11	21.74	63.16	5	85.71	5.56	64.1	12.82	73.91	19.05	100	8	23.81	76.74	20	59.09	33.33	57.38	33.33	61.54	20	58.62	28.57	80	18.18	64.29	12.73	70.37	14.29	47.83	25	76.47	28.57	14.29	69.23	80	63.64	25	33.33	80	36
DHX38	HsaINT0047788	chr16:72104132-72104485	354	chr16:72103946-72104131=72104486-72104626:+	IR-S	5.48	70.85	13.89	71.9	8.67	69.76	9.93	80.52	5.48	78.57	7.1	79.14	7.44	77.58	7.98	22.39	75.45	18.84	77.87	21.74	81.96	22.97	79.55	13.27	78.57	17.24	81.58	24.14	81.86	25.58	79.21	3.95	65.55	12.9	66.39	12.4	69.72	14.71	69.35	7.83	63.27	9.35	64.56	11.72
DIP2A	HsaINT0048088	chr21:46551905-46554168	2264	chr21:46551824-46551904=46554169-46554292:+	IR-C	0	33.33	1.96	44.74	2.44	52.48	6.67	53.85	20	39.45	0	43.59	3.03	36	16.28	12.82	62.5	8.82	69.44	9.52	54.74	9.8	62.96	7.69	51.52	9.86	48.51	20	51.72	13.85	53.57	11.86	40.74	22.67	32.26	8.33	47.13	11.39	36	10	40.43	12.94	40.87	7.46
DIP2A	HsaINT0048104	chr21:46557070-46557584	515	chr21:46556939-46557069=46557585-46557753:+	IR-S	5.56	54.22	13.04	52.24	12.5	60.92	4.55	79.17	8.11	43.64	16.67	58.24	22.73	51.61	21.43	16.67	60.85	13.33	54.1	8.05	43.65	6.38	38.21	13.04	29.87	8.33	38.06	8.33	52.94	16.46	62.75	5.66	30.12	7.69	29.41	7.53	23.48	10.59	28.26	3.8	26.83	7.69	21.95	7.25
DIP2A	HsaINT0048107	chr21:46560784-46561747	964	chr21:46560722-46560783=46561748-46561805:+	IR-C	9.68	71.05	6.67	58.26	6.67	71.97	8.57	86.15	9.68	74.6	29.41	83.94	23.08	86.21	25.49	44.3	93.16	28.81	87.04	46.15	74.16	16.36	65.16	26.58	52.38	23.81	71.01	41.77	89.25	40	86.03	15.97	35.24	13.4	30.23	12.28	46.94	23.21	37.5	10	36.55	9.09	26.42	16.28
DIP2A	HsaINT0048108	chr21:46561806-46563857	2052	chr21:46561748-46561805=46563858-46563932:+	IR-C	9.68	55.32	8	77.53	8.33	58.94	3.45	81.82	8.7	60.54	8.57	64.81	25	61.22	22.22	40	82.26	41.67	74.16	18.64	82.72	24.32	82.61	14.89	64.54	13.89	78.48	40.85	79.13	28.21	79.19	15.15	43.1	19.57	40.91	10	41.3	15.38	56.52	10.77	40.54	18.75	48.44	9.38
DIP2B	HsaINT0048113	chr12:50683249-50685832	2584	chr12:50683138-50683248=50685833-50685956:+	IR-C	0	65.22	0	47.37	0	30.43	3.23	50	12.82	20	7.14	42.86	5.26	66.67	10.53	12.82	73.33	29.73	62.5	5.56	48	12.2	50	13.33	20	7.32	37.5	2.7	100	21.43	87.5	2.33	27.27	2.13	55.56	0	21.74	0	66.67	2.56	36.84	2.13	26.67	6.98
DIS3	HsaINT0048209	chr13:72781357-72781604	248	chr13:72781605-72782206=72781289-72781356:-	IR-C	11.11	100	38.46	28.57	15.79	60	6.67	87.5	18.52	100	60	80	14.29	50	8.33	50	37.93	36.84	71.43	22.73	40.91	35.14	86.67	44.44	60	7.69	50	33.33	81.82	41.67	80	13.04	46.67	13.04	27.27	7.69	36.84	10.34	20	0	16.67	26.32	44.44	23.08
DIS3L2	HsaINT0048260	chr2:232335875-232336468	594	chr2:232335773-232335874=232336469-232337198:+	IR-S	8.94	74.74	30.51	90.82	19.79	72.74	25.58	84.87	28.57	83.35	26.11	85.65	20.7	82.11	21.63	36.69	75.89	19.1	77.82	24.8	72.39	31.99	87.52	31.7	74.26	29.92	74.83	25.66	76.17	30.36	70.49	13.79	29.31	25.84	41.41	20.49	58.25	20.66	46.6	19.49	55.9	16.26	53.55	24.85
DIXDC1	HsaINT0048307	chr11:111974984-111980736	5754	chr11:111974876-111974983=111980737-111980849:+	IR-C	25	90.91	21.74	46.67	41.18	37.5	69.23	20	42.86	47.37	46.67	48.15	55.56	73.91	37.5	27.27	84.62	36.36	61.9	37.78	50	21.31	38.46	19.35	28.57	30.77	47.83	33.33	33.33	55.1	70.37	27.78	46.67	27.84	65.22	41.57	63.27	44.44	41.18	46.15	41.18	35.85	55	48.15
DLG1	HsaINT0048489	chr3:197075871-197081050	5180	chr3:197081051-197081117=197075837-197075870:-	IR-C	0	100	25	53.18	30.69	69.43	100	100	33.33	100	9.97	71.77	0	74.31	9.09	11.17	33.38	21.96	25.76	3.61	21.32	3.63	15.61	5.56	9.97	9.05	20.83	4.52	14.29	4.17	23.56	0	16.17	8.96	43.55	7.16	20	7.45	15.05	14.19	22.44	4.35	54.84	8.79
DLG4	HsaINT0048571	chr17:7192003-7192944	942	chr17:7192945-7193117=7191893-7192002:-	IR-S	12.31	86.52	15.09	85.84	20	87.34	17.99	83.04	10.42	87.98	15.89	85.74	26.73	84.42	27.81	20.45	68.85	22.45	69.8	16.91	66.8	20	64.92	18.13	74.22	14.7	69.93	16.48	65.73	16.83	68.2	2.01	25.66	3.42	26.86	2.61	19.17	3.99	30.78	3.15	25.62	2.5	31.91	2.21
DLG4	HsaINT0048572	chr17:7191359-7191892	534	chr17:7191893-7192002=7191267-7191358:-	IR-S	16.85	92.99	33.33	91.94	17.65	92.65	23.2	93.09	23.33	92.28	14.56	95.33	18.64	92.45	27.73	26.45	90.97	25.15	89.51	22	84.01	10.05	79.19	15.38	86.27	18.02	85.49	28.93	84.54	27.75	80.31	3.93	45.78	6.23	49.48	2.45	35.71	5.53	47.85	4.4	42.56	3.7	49.8	2.01
DLGAP4	HsaINT0048655	chr20:36497067-36499241	2175	chr20:36496705-36497066=36499242-36499321:+	IR-C	100	100	100	100	57.14	100	100	100	100	100	100	100	100	100	81.82	92.31	100	100	100	88.89	98.86	94.44	96.36	83.33	100	93.75	100	85.71	100	94.44	100	93.94	95.06	75	91.4	84.62	90.24	81.48	94.59	73.91	89.57	76.92	96.55	76.74
DLGAP4	HsaINT0048656	chr20:36499322-36500198	877	chr20:36499242-36499321=36500199-36500611:+	IR-C	100	100	100	100	100	100	100	100	100	100	100	100	100	100	100	100	100	100	100	100	100	100	100	100	100	100	100	100	100	100	100	100	100	100	100	96.77	100	100	100	100	100	100	100	100
DLL1	HsaINT0048696	chr6:170285700-170286237	538	chr6:170286238-170286298=170285569-170285699:-	IR-S	14.29	61.7	10.53	68.14	4.76	56.76	0	75.61	20	67.39	9.09	66.67	16.67	66.67	15.38	16.21	63.35	17.73	62.46	14.2	63.24	11.97	70.22	10.22	53.76	12.01	62.18	15.88	61.94	15.17	52.62	12.28	53.33	25.33	43.8	17.01	51	35.8	66.45	19.75	48.77	21.89	59.56	17.79
DLL3	HsaINT0048706	chr19:39505452-39507038	1587	chr19:39505229-39505451=39507039-39507618:+	IR-C	31.43	31.58	30.77	71.43	25.93	36.36	52.94	57.14	15.79	47.37	33.33	69.23	13.64	38.46	24.59	3.78	6.13	3.36	5.59	2.75	11.03	1.49	9.08	1.28	4.09	3.32	8.49	3.02	7.69	3.66	6.43	1.71	4.17	3.51	3.37	2.8	3.88	2.49	6.17	1.89	4.29	3.8	5.09	2.86
DLL3	HsaINT0048708	chr19:39507915-39508251	337	chr19:39507830-39507914=39508252-39508481:+	IR-S	26.32	60	12.82	23.08	14.29	64.71	8.77	22.22	19.15	46.67	11.76	29.41	12.36	31.43	18.92	28.74	42.17	25.41	42.44	23.04	51.19	25.85	49.76	23.04	36.35	25.47	45.03	25.22	46.6	30.35	39.38	23.29	33.33	27.47	29.76	27.66	43.54	30.12	38.86	27.42	29.92	24.94	32.56	23.08
DMAP1	HsaINT0048752	chr1:44214899-44218310	3412	chr1:44214703-44214898=44218311-44218469:+	IR-C	8.7	85.64	4.8	75.06	14.39	85.44	21.97	87.28	11.11	89.74	15.35	89.2	11.11	82.07	16.67	22.12	80.71	16.07	69.16	18.67	75.12	19.42	82.97	20.12	67.95	20.79	81.49	10.04	86.1	26.24	67.94	28.7	61.41	25.22	61.97	21.07	63.04	27.54	82.35	31.84	70.36	27.04	73.03	14.29
DMTF1	HsaINT0049008	chr7:87152556-87163494	10939	chr7:87152361-87152555=87163495-87163617:+	IR-C	15.79	57.14	17.65	44.68	13.16	40	5.41	31.03	13.58	49.4	13.92	51.72	8.7	65.22	17.81	16.22	22.45	20.69	33.33	23.64	25	25.42	28	23.08	26.98	22.73	18.03	12.12	38.78	12.12	35.59	17.46	42.86	24.24	33.33	23.08	25.93	17.24	23.08	26.32	37.93	15.15	29.73	13.85
DMXL2	HsaINT0049101	chr15:51458796-51463378	4583	chr15:51463379-51463496=51458709-51458795:-	IR-S	100	100	100	100	100	100	100	100	100	100	0	100	100	100	100	66.67	100	100	100	73.33	84.62	80	100	80.95	100	45.45	80	58.33	100	60	81.25	2.22	23.53	15.15	20	10.53	16.67	2.13	25	3.23	42.86	5.26	21.74	2.86
DNAJB12	HsaINT0050197	chr10:72334618-72335779	1162	chr10:72335780-72335931=72332830-72334617:-	IR-S	59.46	89.83	65.62	82.98	75.68	87.3	77.78	100	88.68	88.46	81.58	86.21	66.15	77.27	80	89.33	88.41	71.01	87.1	68.83	91.38	66.27	76.27	68.25	77.46	69.41	73.53	64.04	92	70.45	89.66	75.56	78.12	67.06	81.82	74.68	96.61	73.63	86.36	60.66	80	68.67	77.42	72.6
DNAJB2	HsaINT0050212	chr2:219284836-219285986	1151	chr2:219284632-219284835=219285987-219286900:+	IR-S	6.67	86.67	8.66	84.53	6.19	74.58	12.78	86.82	6.52	88.68	8.74	85.71	3.65	90.37	8.53	35.82	80.82	45.59	84.25	35.1	95.06	47.13	94.07	44.44	87.34	36.17	88.63	37.39	87.26	37.7	78.16	64.54	93.98	71.94	94.07	69.48	94.97	61.6	95.14	65.1	94.17	62.39	93.73	60.37
DNAJC11	HsaINT0050282	chr1:6652952-6653910	959	chr1:6653911-6654039=6652829-6652951:-	IR-S	3.25	48.24	3.89	54.08	6.38	62.16	16.84	77.78	5.99	60.98	6.2	60.66	5.64	67.39	23.15	19.23	79.59	22.73	63.64	5	63.92	9.32	52.94	11.11	40.5	7.69	59.06	13.75	55.41	14.69	71.43	2.61	25	3.41	15.7	5.48	25.84	5.56	21.65	4.81	14.55	3.96	22.22	2.86
DNAJC11	HsaINT0050283	chr1:6651603-6652828	1226	chr1:6652829-6652951=6651529-6651602:-	IR-S	8.7	60.47	10	75.88	11.76	64.91	20.35	69.63	9	78.07	13.77	63.98	11.11	62.83	23.47	22.45	77.78	23.08	62.71	10.84	61.45	13.21	45.28	14.63	45.61	12.31	51.58	15.66	64.36	16.42	53.19	0	22.35	3.31	10.34	4.92	15.07	3.23	30.16	3.64	20.99	5.04	20	6.78
DNAJC11	HsaINT0050284	chr1:6645979-6651528	5550	chr1:6651529-6651602=6645789-6645978:-	IR-S	10.75	83.91	9.33	82.98	13.24	86.29	15.96	91.38	12.76	85.11	17.15	87.12	15.27	85.25	27.2	23.08	78.95	21.05	81.95	25.62	75.16	19.77	70.33	12.06	60.45	20.59	58.43	20.93	73.41	21.28	70.54	4.84	33.33	11.24	44.35	3.95	36.54	8.05	52	7	35.03	10.28	48.8	9.39
DNAJC13	HsaINT0050330	chr3:132514671-132516421	1751	chr3:132514571-132514670=132516422-132516496:+	IR-S	2.22	56.86	1.54	2.86	7.41	51.35	6.25	48.28	2.04	25	1.49	13.33	15.15	66.67	8.7	25	82.61	2.86	22.22	22.58	62.22	16.13	41.18	14.29	10.53	8	23.08	12.5	74.19	20.93	68.75	12.2	39.39	0	6.67	5.88	69.23	6.67	25.58	3.45	0	0	8.11	22.45
DNAJC17	HsaINT0050370	chr15:40768063-40773726	5664	chr15:40773727-40773837=40767869-40768062:-	IR-C	4.76	40.59	1.49	32.58	6.67	45.26	9.09	31.67	2.22	59.18	8.24	31.91	6.25	28.57	4.88	13.89	28.95	6.25	31.71	8.74	46.21	9.8	42.86	18.31	43.93	11.93	59.38	10.48	32.76	9.52	28.57	15.49	45.79	35.14	43.18	26.21	44.23	22.95	39.85	17.46	44.07	17.86	43.28	17.39
DNAJC24	HsaINT0050424	chr11:31414950-31426286	11337	chr11:31414811-31414949=31426287-31426355:+	IR-C	12.5	14.29	18.75	5.26	10.71	14.29	13.73	20	7.69	2.44	11.86	18.75	6.12	66.67	14.29	35	41.18	25.42	69.23	18.31	39.06	41.46	66.67	6.67	33.33	28.36	12.5	17.24	27.27	75.76	33.33	17.65	42.86	16.13	42.86	15.38	27.27	17.24	0	6.67	25	9.68	50	22.22
DNAJC24	HsaINT0050425	chr11:31426356-31430270	3915	chr11:31426287-31426355=31430271-31432835:+	IR-S	5.56	40	11.11	10	9.09	48.39	5.66	38.89	8.11	34.69	13.92	41.67	20	55.56	4.76	11.43	36.84	29.17	45.45	12.12	17.65	8.57	60	15.15	26.32	11.11	61.9	20.75	29.41	12.9	37.5	14.29	20	14.29	40	4.76	14.29	11.11	100	0	20	7.69	33.33	0
DNAJC4	HsaINT0050456	chr11:64233981-64234072	92	chr11:64233894-64233980=64234073-64234281:+	IR-S	24.75	35.65	20.79	32.73	35.56	36.47	30.43	40	36.51	44.26	28.36	34.18	23.08	50	22.89	27.69	30.91	32.05	32.05	27.57	38.65	32.14	33.71	25.42	30.81	28.89	27.91	23.73	39.34	28.05	38.46	34.56	29.71	31.12	34.72	33.03	33.66	31.88	30.63	34.26	39.39	32.29	39.56	24.78
DNALI1	HsaINT0050527	chr1:37557749-37559326	1578	chr1:37557603-37557748=37559327-37559496:+	IR-S	1.75	13.04	6.45	37.5	7.69	53.85	2.97	10	1.2	45.45	2.7	36	4.48	25	3.33	8.06	22.03	12.06	31.58	12.87	61.4	7.69	45.45	14.07	38.14	11.11	47.69	11.71	23.08	8.57	17.31	33.83	42.86	22.78	28.09	45.71	51.11	19.01	45.45	14.29	38.27	18.11	55.22	15.45
DNALI1	HsaINT0050528	chr1:37559497-37561556	2060	chr1:37559327-37559496=37561557-37561735:+	IR-S	0	17.24	4.76	52.94	15.79	62.5	2.94	41.94	12	52.38	3.03	35.29	6.17	78.95	4.88	12.82	48.28	13.39	43.75	20	64.15	10.42	65.52	14.29	33.33	17.79	67.21	12	31.25	6.67	31.82	17.53	43.43	27.42	47.37	26.76	33.33	28.97	54.1	19.3	40	31.18	46.39	19.57
DNASE1	HsaINT0050535	chr16:3656754-3656998	245	chr16:3656638-3656753=3656999-3657111:+	IR-S	24.64	50.93	41.18	34.8	44.36	68.18	11.54	43.78	16.6	31.56	16.57	52.02	2.49	20.93	12	19.89	41.25	22.1	34.49	30.69	58.94	12.19	44.6	22.91	60.97	13.45	38.97	15.79	52.62	14.29	27.08	59.68	63.4	6.67	65.09	49.88	100	28.77	44.04	69.16	46.15	45.17	40.78	33.15
DNASE1	HsaINT0050536	chr16:3657112-3657186	75	chr16:3656999-3657111=3657187-3657341:+	IR-S	77.78	81.82	37.14	48.72	100	57.14	77.78	81.48	60	72.22	56.25	82.22	51.52	57.89	61.29	52	79.17	71.43	74.19	86.67	71.83	92.31	94.44	100	77.27	69.23	89.74	60	94.44	75.76	93.55	81.25	76	74.19	100	70.37	89.47	66.67	100	66.67	61.9	59.09	93.1	87.5
DNASE1	HsaINT0050538	chr16:3657817-3657905	89	chr16:3657720-3657816=3657906-3658095:+	IR-S	40	44	54.55	64.71	50	70.59	12	57.45	55.56	70.59	33.33	57.14	27.27	57.89	31.71	50	60	70	52	84.62	80.65	66.67	72.22	91.3	75	44.83	70	36	70.73	50	50	78.72	100	66.67	66.67	89.47	58.62	93.75	69.23	92.31	63.64	86.21	77.78	80
DND1	HsaINT0050569	chr5:140673389-140673518	130	chr5:140673519-140673586=140673271-140673388:-	IR-S	40	67.31	31.58	65.33	14.29	61.22	33.33	58.06	20	68.83	52.38	67.57	28	72.84	28	45.45	79.8	79.49	84.44	62.26	78.26	57.89	80.24	68.63	81.37	77.78	89.47	56.25	76.35	52	67.74	76.74	95.24	77.22	97.65	90.48	86.83	66.1	93.2	83.33	95.97	86.21	93.2	72.97
DNHD1	HsaINT0050593	chr11:6497668-6497770	103	chr11:6497585-6497667=6497771-6498961:+	IR-S	100	54.29	66.67	29.03	44.44	50	73.33	45.1	57.14	71.83	57.14	48.94	50	67.57	55.56	93.75	64.21	86.05	69.23	88.89	61.07	100	72.09	100	78.95	55.56	50.94	82.86	75	87.76	81.82	77.78	93.55	100	100	100	89.47	91.3	85.71	100	100	100	100	100
DNHD1	HsaINT0050618	chr11:6502927-6508879	5953	chr11:6502753-6502926=6508880-6509083:+	IR-C	20	14.29	0	7.69	9.09	4.48	0	4.23	0	1.18	11.11	2.65	0	16.13	16.67	8.11	4.48	11.11	12	14.29	7.07	13.04	2.86	11.11	20	9.09	6.67	7.14	1.96	7.14	5	28.57	57.89	60	63.64	30.77	11.11	42.86	20	20	47.83	42.86	50	50
DNM1	HsaINT0050627	chr9:128224390-128234020	9631	chr9:128224251-128224389=128234021-128234107:+	IR-S	81.82	100	83.78	97.79	90.32	96.97	87.5	98.35	72	99.25	86.36	98.74	93.75	100	89.9	85.81	98.5	96.83	98.36	91.03	96.4	85.9	98.53	87.34	95.73	79.61	97.44	85.88	97.78	91.25	97.03	40.54	79.21	48.32	76.47	45.29	78.33	61.54	87.99	35.32	73.67	35.71	77.32	39.82
DNM1	HsaINT0050645	chr9:128222861-128224250	1390	chr9:128222793-128222860=128224251-128224389:+	IR-S	81.48	89.96	58.58	94.96	64.38	96.27	69.35	98.72	69.68	94.54	72.76	98.98	100	96.97	79.04	84.62	97.08	80.54	97.04	79.04	95.64	62.42	94.99	83.49	92.98	74.09	90.83	85.13	97.27	93.33	93.56	34.07	63.02	35.35	54.35	34.05	57.78	39.36	77.45	26.36	60.95	27.97	61.16	27.7
DNM1L	HsaINT0050653	chr12:32737943-32738263	321	chr12:32737865-32737942=32738264-32738296:+	IR-C	3.97	57.77	8.83	51.15	13.11	71.6	3.42	68.63	10.65	60.65	8.44	64.18	4.18	69.7	4.33	29.72	68.09	29.02	54.81	20.2	55.78	26	71.31	20.29	55.7	24.51	60.15	16.2	40.41	23.68	67.09	15.13	35.7	21.16	27.57	16.64	28.63	20.67	55.36	15.55	23.4	15.45	40.85	15.55
DNM1L	HsaINT0050654	chr12:32738297-32740063	1767	chr12:32738264-32738296=32740064-32740240:+	IR-C	3.78	39.07	3.84	31.56	4.19	37.89	5.93	34.94	4.15	48.66	6.14	36.83	1.99	36.79	4.66	24.65	62.22	21.99	72.72	15.9	58.34	13.49	55.85	20.83	48.69	20.54	59.32	29.06	54.42	19.08	62.04	10.23	33.56	25.09	36.76	11.05	29.69	22.96	39.36	12.05	41.79	18.56	37.63	6.56
DNM2	HsaINT0050674	chr19:10808581-10812263	3683	chr19:10808569-10808580=10812264-10812377:+	IR-C	3.56	47.17	3.14	72.95	8.2	40	14.7	77.78	4.89	45.51	14.18	62.91	13.37	33.58	14.92	13.64	71.18	7.08	64.1	20.52	66.61	11.63	47.96	22.65	58.52	16	44	19.54	70.59	16.6	55.97	12.5	26.96	6.19	20.75	18.71	28.21	15.38	52.54	16.42	42.15	11.49	51	15.15
DNM2	HsaINT0050687	chr19:10795440-10796060	621	chr19:10795372-10795439=10796061-10796199:+	IR-C	2.82	86.95	17.98	84.65	12.56	87.13	26.5	92	11.32	88.8	27.28	96.74	25.06	92.04	40.14	100	100	39.66	100	40.35	100	45.67	100	100	88.06	100	91.46	100	100	49.88	100	100	100	40.18	100	100	100	100	100	62.57	82.34	62.57	100	33.01
DNMT3B	HsaINT0050805	chr20:32802471-32807761	5291	chr20:32802385-32802470=32807762-32809356:+	IR-C	14.42	83.39	17.61	80.6	15.6	81.79	23.74	90.54	13.04	82.57	29.21	89.04	29.64	88.2	39.32	12.73	37.14	5.69	30.58	8.67	40.45	7.39	45.1	12.58	45.45	8.54	40.26	8.46	32.48	7.48	31.62	10.75	35.56	13.36	33.02	12.86	34.74	14.15	36.74	13.68	39.89	10.6	43.38	11.3
DNMT3B	HsaINT0050808	chr20:32784860-32786501	1642	chr20:32784758-32784859=32786502-32786627:+	IR-S	0.15	4.64	0.11	4.14	0.21	5.27	0.23	10.97	0.33	5.18	0.59	8.49	0.47	6.93	0.76	7.44	12.09	5.69	26.53	3.03	18.58	5.26	23.81	3.33	9.24	3.61	15.38	3.33	16.08	13.55	30.91	21.43	63.64	30.23	44.19	43.4	50	40.54	50	31.58	56.76	30.3	74.19	14.75
DNMT3B	HsaINT0050809	chr20:32786628-32787229	602	chr20:32786502-32786627=32787230-32787451:+	IR-S	0.12	3.73	0.06	1.44	0.09	2.15	0.05	4.33	0.17	2.49	0.21	3.57	0.04	3.15	0.63	14.29	33.33	11.48	24.32	3.8	24.64	13.68	35.9	4.55	16.46	8.96	16.98	6.78	15.11	10.08	38.35	47.37	84.62	53.42	54.29	63.33	90.7	73.91	87.5	50	78.67	67.82	88.57	56.36
DNMT3B	HsaINT0050813	chr20:32792771-32795408	2638	chr20:32792626-32792770=32795409-32795534:+	IR-C	44.44	95.9	50.85	96.52	48.65	92.7	86.05	99.19	48.43	91.85	69.84	97.54	65.71	98.41	85.07	13.82	57.69	17.5	45.65	9.47	49.41	9.84	44.83	11.5	40.38	10.4	42.86	16.25	38.98	8.66	45.56	11.89	21.35	11.11	26.32	15.9	34.38	8.84	30.56	12.5	30.56	10.64	23.81	5.88
DNPEP	HsaINT0050826	chr2:219387164-219387758	595	chr2:219387759-219387940=219387070-219387163:-	IR-S	2.78	8.57	2.26	5.75	2.2	9.62	7.91	15.22	0.62	14.29	5.41	12.96	2.33	7.41	5.81	3.45	8.43	2.13	12	1.89	18.7	3.53	27.27	1.37	13.85	1.41	14.29	2.13	13.43	5.26	17.24	20	61.9	19.4	58.27	26.53	57.8	19.05	59.52	15.79	58.26	19.3	50	19.35
DOC2A	HsaINT0050872	chr16:30007300-30008995	1696	chr16:30008996-30009105=30007173-30007299:-	IR-C	7.69	17.91	0	17.65	4.35	17.24	17.65	13.68	0	13.43	11.11	17.46	6.67	9.84	4.35	0	27.27	0	27.27	14.29	53.85	0	63.64	100	33.33	9.09	28.57	9.09	50	20	27.27	24.44	67.27	20	67.57	22.86	57.98	25.49	66.32	24.44	70	38.89	67.74	16.67
DOCK3	HsaINT0051112	chr3:51275207-51277607	2401	chr3:51275079-51275206=51277608-51277754:+	IR-S	100	100	33.33	100	75	100	42.86	100	100	75	100	71.43	50	100	100	71.43	84.62	50	100	11.11	57.14	23.08	100	20	83.33	33.33	64.71	14.29	68.42	33.33	62.5	2.22	28.57	7.69	100	17.65	37.5	9.52	33.33	3.45	27.27	3.03	30	12.5
DOCK3	HsaINT0051115	chr3:51310327-51312003	1677	chr3:51310232-51310326=51312004-51312079:+	IR-S	0	50	0	5.88	0	0	20	70	9.09	55.56	0	63.64	4.35	42.86	11.11	16.67	21.74	33.33	66.67	20	36.36	27.27	100	33.33	42.86	0	55.56	38.46	42.86	45.45	25	7.32	20	5.26	0	4.76	40	0	50	0	20	40	0	12.5
DOCK3	HsaINT0051140	chr3:51374588-51375747	1160	chr3:51374469-51374587=51375748-51375835:+	IR-S	0	43.28	0	46.67	5.26	67.86	16.67	71.72	0	74.07	0	50	17.24	44.83	12.5	38.46	51.28	28.57	59.26	13.04	49.33	9.09	33.33	6.25	31.15	26.32	42.86	22.22	52.73	36.36	68.25	5.26	15.15	7.41	8.57	4.23	11.69	4.55	8.43	3.9	23.08	5.62	13.73	4.23
DOCK3	HsaINT0051142	chr3:51380208-51381049	842	chr3:51380125-51380207=51381050-51384198:+	IR-S	8.33	34.62	50	25	4	23.81	8.33	25.32	0	26.53	25	27.27	27.27	22.5	31.43	20	35.38	60	32.14	5.26	40.85	14.29	36.51	12.5	30.61	10	32.2	12.5	40.43	15.38	52.54	12.2	42	18.31	36.36	11.11	36.11	9.86	50.5	4.62	31.58	5.88	38.1	20
DOK4	HsaINT0051467	chr16:57479689-57486304	6616	chr16:57486305-57486473=57479442-57479688:-	IR-C	62.5	86.67	66.67	67.57	94.74	100	72.22	92.59	76.92	88.89	60	100	52.94	100	66.67	100	100	100	100	100	89.47	81.82	86.21	50	100	100	66.67	100	87.5	100	100	97.1	98.69	97.2	98.46	94.2	93.97	94.12	98.03	96.55	94.62	98.54	100	100
DOK4	HsaINT0051474	chr16:57473496-57473612	117	chr16:57473613-57473736=57471958-57473495:-	IR-S	7.27	32.96	10.61	39.38	14.73	32.58	17.77	16.11	17.26	27.08	11.74	41.43	16.51	38.9	10.89	8.97	19.69	33.12	14.86	10.97	39.94	10.97	56.33	51.61	39.83	15.79	51.72	10	31.2	30.83	31.03	20.36	31.19	35.56	32.31	23.84	30.14	18.85	38.03	24.68	29.13	24.05	35.2	26.95
DONSON	HsaINT0051504	chr21:33587603-33588320	718	chr21:33588321-33588708=33587522-33587602:-	IR-S	4.76	33.33	0	29.03	0	50	5.26	73.33	0	69.23	0	64.71	20	29.41	8.57	27.27	56.67	23.33	54.72	10.71	56.25	17.65	39.53	8.7	44	12	62.16	26.32	45.76	19.35	40.3	50	25	22.22	66.67	23.08	30.43	28.57	40	0	33.33	20	33.33	14.29
DOT1L	HsaINT0051606	chr19:2227128-2229784	2657	chr19:2226183-2227127=2229785-2232578:+	IR-S	33.33	98.31	44.76	97.77	35	97.42	42	99.61	48.67	99.6	27.27	98.49	41.67	98.27	51.38	77.31	96.52	72.56	96.55	69.11	97.95	61.44	99.13	74.62	98.14	73.57	96.06	73.04	96.89	70.39	95.84	53.33	92.46	57.18	94.78	40	84.91	56.42	92.87	51.9	90.3	50.45	93.52	37.1
DPAGT1	HsaINT0051614	chr11:119101139-119101494	356	chr11:119101495-119102075=119101018-119101138:-	IR-S	6.17	58.33	6.29	63.27	11.45	55.22	3.96	66.25	5	67.05	11.27	82.46	16.85	70.11	12.42	26.58	78.65	25.42	72.68	14.29	72.04	12.94	71.21	11.69	66.37	20	70	27.03	63.87	20.83	68.55	13.43	40.98	12.2	46.88	10.81	47.37	23.33	55	21.05	71.01	12.73	50.56	13.33
DPAGT1	HsaINT0051615	chr11:119100844-119101017	174	chr11:119101018-119101138=119100630-119100843:-	IR-S	9.58	85.39	6.42	73.83	8.84	80.05	6.19	71.59	9.14	71.42	6.77	88.76	10.96	72.67	7.2	24.74	83.69	26.33	78.75	13.75	84.78	16.26	91.14	36.72	80.33	24.26	76.91	14.04	81.03	12.06	70.9	19.08	56.08	25.22	57.53	15.38	58.54	19.12	57.59	9.89	62.29	25.72	59.9	26.14
DPH1	HsaINT0051688	chr17:2041182-2041480	299	chr17:2041103-2041181=2041481-2041621:+	IR-S	1.82	28.84	2.27	38.25	4.76	44.58	2.86	49.49	5.13	33.79	2.27	43.5	2.08	34.63	6	11.11	64.31	24	66.23	12.09	58.33	20.75	64.53	17.65	34.18	13.85	54.01	16.67	56.94	28.89	69.64	8.24	22.71	8.74	31.48	13.58	28.12	3.57	34.81	4.59	32.44	6.38	33.91	2.33
DPH1	HsaINT0051690	chr17:2041876-2042604	729	chr17:2041768-2041875=2042605-2043431:+	IR-S	4.35	80.06	4.35	83.55	18.18	91.58	5.88	95.1	6.06	87.1	11.34	87.31	5.26	90.54	15.91	38.46	90.55	22.67	84.8	21.52	78.39	16.28	70.61	13.04	78.3	17.5	74.47	31.91	73.84	20.83	87.5	36.94	84.62	40	79.59	28.71	76.71	21.48	67.37	22.86	65.42	28.33	75.59	22.22
DPH1	HsaINT0051695	chr17:2036957-2039754	2798	chr17:2036835-2036956=2039755-2039823:+	IR-C	10.84	62.26	4.35	66.67	5	54.55	7.87	83.21	4.44	59.26	8.24	83.12	9.09	65.56	7.04	26.67	83.56	20	74.55	7.14	75.68	9.76	71.9	19.05	63.64	13.51	77.78	34.38	79.22	21.95	82.39	13.98	57.48	20	62.41	12.64	52.31	14.75	46.67	8.57	58.9	19.1	55.86	20.69
DPM2	HsaINT0051724	chr9:127936656-127937433	778	chr9:127937434-127937523=127936553-127936655:-	IR-S	16.42	54.26	13.49	43.75	12.71	37.3	14.33	51.18	12.71	59.65	13.72	51.18	17.54	39.19	14.23	19.7	25.97	25.53	34.78	19.5	30.34	21.32	41.77	21.4	34.36	19.21	34.5	19.89	29.82	24.4	30.88	35.63	33.62	40.27	44.13	33.8	37.59	26.19	36.19	30.24	37.22	29.75	28.87	25.43
DPP7	HsaINT0051824	chr9:137114577-137114646	70	chr9:137114647-137114743=137114463-137114576:-	IR-S	13.04	28.57	0	23.4	50	39.68	0	38.74	12.5	38.89	42.86	26.67	25.93	25.76	7.25	8.77	20.19	14.29	23.66	10.81	25.83	18.1	33.53	8.33	40	42.86	35.2	7.69	30.77	16.67	15.03	32.2	53.02	33.33	70.27	34.04	52.11	32.35	57.08	27.27	54.41	37.78	51.55	50
DPP7	HsaINT0051834	chr9:137112231-137112744	514	chr9:137112745-137112805=137112112-137112230:-	IR-S	9.09	92.36	11.76	92.69	21.74	94.08	10.84	92.53	20	95.24	11.48	95.73	10.89	93.42	15.04	27.43	88.28	21.13	84.65	31.97	93.24	19.08	94.64	21.43	86.25	20	90.11	12.4	86.94	20.75	83.97	30.43	85.06	26.15	83.51	29.91	77.1	26.32	83.48	19.4	85.51	17.11	88.19	24.44
DRG2	HsaINT0052192	chr17:18099724-18100362	639	chr17:18099633-18099723=18100363-18100435:+	IR-S	7.46	83.72	7.32	76.09	6	68.75	5.45	77.78	7.84	79.63	16.33	80.85	8.74	80	1.23	14.29	68.18	10	61.36	14.78	79.79	14.67	83.33	19.35	74.74	18.31	73.05	18.18	79.83	14.29	57.75	9.68	63.16	37.5	80.95	16.67	78.57	21.74	71.43	25	74.71	15.15	74.14	17.65
DSCR3	HsaINT0052391	chr21:37232452-37233361	910	chr21:37233362-37233442=37232377-37232451:-	IR-S	3.45	67.86	4.92	63.16	7.94	65.96	7.69	71.64	5.69	57.89	3.61	67.06	5.45	71.43	11.21	12.33	80.95	35.14	77.27	18.6	53.09	14.29	58.33	22.45	40.43	11.36	52.54	19.54	57.69	20.99	48.57	11.86	20.75	16.05	38.46	16.13	14.29	14.71	27.27	2.44	24.32	10.71	54.55	10
DST	HsaINT0052585	chr6:56466196-56468981	2786	chr6:56468982-56468999=56466078-56466195:-	IR-C	11.11	11.59	0	5.07	17.97	19.41	0	17.4	59.54	10.62	13.58	19.47	0	9.23	17.32	28.51	47.21	77.99	38.83	78.98	49.48	26.97	31.57	44.09	50.09	18.6	29.65	40.17	39.6	31.37	45.27	14.89	8.85	33.01	17.77	17.03	7.8	2.2	12.29	11.17	22.16	17.32	11.99	14.82
DTNB	HsaINT0052676	chr2:25383890-25387288	3399	chr2:25387289-25387378=25383836-25383889:-	IR-C	9.09	24	5.26	22.58	18.52	25.93	38.46	45.1	5.88	35.29	0	31.58	7.69	26.47	14.29	11.11	66.67	11.11	75	0	45.45	0	100	11.11	66.67	13.04	73.33	33.33	33.33	17.65	50	5.88	25.71	14.29	50	17.24	60	6.67	46.67	31.03	80	20	30.77	6.25
DTX3	HsaINT0052733	chr12:57604859-57605570	712	chr12:57604821-57604858=57605571-57605731:+	IR-S	74.28	92.88	59.26	95.14	54.58	97.23	71.74	96.35	46.97	94.97	51.27	97.28	52.29	94.89	71.87	56.26	95.04	55.4	92.58	61.21	91.14	40.98	93.49	47.96	85.16	45.48	90.44	59.26	91.97	63.63	93.3	25.05	75.83	22.33	70.11	28.4	70.33	23.21	77.83	22.38	73.03	20.32	73.43	25.1
DTX3	HsaINT0052734	chr12:57605732-57606189	458	chr12:57605571-57605731=57606190-57606252:+	IR-S	8.77	51.79	10.2	55.18	8.05	53.85	17.33	68.36	5.41	57.22	16.22	66.47	11.63	53.62	16.22	16.28	52.24	17.74	47.29	10.31	47.88	9.09	41.84	12.88	35.22	9.25	43.1	10.34	49.64	13.18	47.15	6.02	43.92	5.85	32.07	5.38	33.04	6.07	42.16	3.68	28.55	5.84	37.66	4.29
DTYMK	HsaINT0052751	chr2:241680320-241685768	5449	chr2:241685769-241685877=241680229-241680319:-	IR-C	10.86	33.75	15.85	38.24	12.41	47.1	19.53	68.99	17.95	48.25	19.27	50	11.88	36.42	16.17	30.61	40.5	34.81	52.94	24.79	41.67	19.75	46.67	27.21	32.96	27.9	49.02	21.04	38.92	27.42	52.94	23.74	36.36	37.31	28.74	47.47	38.67	27.78	13.51	16.31	22.67	22	20.43	30.77
DTYMK	HsaINT0052752	chr2:241678650-241680228	1579	chr2:241680229-241680319=241678452-241678649:-	IR-C	8.59	45	7.92	42.86	9.03	49.73	8.15	67.26	7.47	45.08	11.88	59.78	11.72	36.52	11.4	27.07	47.73	39	53.23	21.54	46.58	16.1	37.84	15.38	44.71	15.65	38.46	19.76	41.18	29.6	52.71	7.1	17.07	14.56	25.37	12	13.89	5.97	25	13.85	21.5	11.56	21.84	8.96
DUS1L	HsaINT0052840	chr17:82058417-82058780	364	chr17:82058781-82058818=82058341-82058416:-	IR-S	13.01	91.55	24.94	84.14	8.74	85.02	10.13	90.43	6.29	84.25	18.3	86.58	6.92	84.2	23.47	42.14	89.84	35.12	90.34	33.84	91.17	31.43	92.44	17.34	87.03	31.55	91.68	30.87	90.36	27.39	86.82	19.92	75.39	32.87	79.68	21.66	76.7	19.55	79.79	11.74	78.06	24.16	76.08	12.52
DUS4L	HsaINT0052883	chr7:107576593-107577312	720	chr7:107576366-107576592=107577313-107578523:+	IR-S	15.15	78.57	7.94	40.54	4.55	30.77	9.8	28.89	11.11	35.29	7.69	50	1.49	53.33	16	33.33	54.55	11.86	66.67	9.09	33.33	16.36	40	23.81	9.09	30.43	45.45	21.95	25	23.81	22.58	0	26.32	24.14	16.67	6.67	40	7.69	0	17.65	18.18	22.22	46.67	4
DUSP12	HsaINT0052900	chr1:161750146-161751667	1522	chr1:161749791-161750145=161751668-161751781:+	IR-S	7.87	34.11	9.62	34.27	16.32	49.24	10.48	35.44	4.48	28.91	19.66	23.81	17.12	13.33	13.02	43.32	53.86	33.09	51.66	17.34	43.02	17.88	31.5	24.62	27.45	15.56	44.21	15.86	47.07	33.75	61.35	28.74	23.31	23.89	30.93	22.28	26.64	21.56	27.24	24.32	34.11	18.36	15.32	28.31
DUSP22	HsaINT0052944	chr6:348842-350821	1980	chr6:348769-348841=350822-351355:+	IR-C	60.47	86.11	61.82	91.04	70.79	83.78	69.05	97.44	69.39	87.01	74.47	96.72	72.55	92.73	75.82	81.08	100	81.08	81.61	71.11	86.05	77.93	85.71	84.78	74.6	70.71	79.07	86.76	89.61	83.58	93.5	93.44	93.33	100	100	100	84.62	93.22	92.86	88.89	93.94	88.62	82.5	77.78
DUSP28	HsaINT0052955	chr2:240561520-240563673	2154	chr2:240561330-240561519=240563674-240564014:+	IR-S	42.86	100	100	50	20	100	33.33	100	14.29	71.43	33.33	57.14	42.86	66.67	66.67	22.22	33.33	28.57	7.69	30	70	47.06	100	54.55	56.52	48.72	55.56	42.86	60	25	17.65	45.45	40.74	66.67	46.67	37.93	28	29.73	50	51.52	25	45.45	39.13	47.06
DVL1	HsaINT0052993	chr1:1338654-1339361	708	chr1:1339362-1339439=1338522-1338653:-	IR-S	54.55	52.5	41.07	54.78	40.32	56.33	60.38	64.67	52.83	53.3	66.2	61.51	58.1	46.69	62.62	62.5	80.95	38.26	69.83	35.44	60.53	35.63	57.84	31.34	49.61	34.02	56.54	41.67	68.08	61.47	80.99	62.04	72.76	69.66	76.47	64.24	80.71	57.48	66.76	70.8	70.08	63.77	72.66	71.93
DVL3	HsaINT0053028	chr3:184164932-184165112	181	chr3:184164796-184164931=184165113-184165206:+	IR-S	6.38	91.06	10.45	84.36	12.63	87.97	14.84	91.63	17.58	90.42	17.39	89.74	26.11	89.24	17.77	32.14	86.35	18.92	83.62	26.67	86.68	21.66	91.29	17.3	82.61	22.38	86.07	27.9	83.77	28.93	80.74	12.54	69.65	20.12	76.64	14.8	68	14.63	77.89	13.58	74.44	14.29	71.43	18.21
DYNC1LI2	HsaINT0053192	chr16:66730224-66732338	2115	chr16:66732339-66732474=66730112-66730223:-	IR-C	15.09	74.55	35.25	77.78	16.17	74.6	17.58	78.72	26.83	83.33	24.72	78.26	26.9	92	29.6	29.23	87.95	44.68	88.24	38.55	90.53	43.17	80.43	43.02	79.71	35.24	79.84	48.48	82.02	32.31	78.82	22.09	53.52	31.14	54.13	18.95	36.94	22.67	64.29	21.78	52.85	23.69	59.06	18.6
DYNC2LI1	HsaINT0053294	chr2:43796796-43800840	4045	chr2:43796718-43796795=43800841-43800917:+	IR-S	10	27.27	7.69	33.33	0	50	20	100	22.22	38.46	17.95	5.26	0	50	9.09	10	55.56	14.81	66.67	13.89	59.09	13.51	60	17.39	53.19	18.03	52.38	26.92	38.46	15	51.52	3.23	57.14	20	36.84	12.5	0	9.09	42.86	16.67	42.86	12.5	28.57	10.53
DYNC2LI1	HsaINT0053295	chr2:43800918-43801638	721	chr2:43800841-43800917=43801639-43801709:+	IR-S	5.26	45.45	0	33.33	0	50	5.88	50	5.26	55.56	5.26	0	6.67	11.11	5.26	9.43	54.84	10.81	44.19	17.81	76	20	46.67	16.67	44	5.66	45.45	23.08	45.95	11.43	45.45	18.75	75	26.67	38.46	14.29	35.48	25	50	20	41.18	14.29	51.72	9.09
DYRK4	HsaINT0053344	chr12:4607388-4610154	2767	chr12:4607327-4607387=4610155-4610284:+	IR-S	4.76	37.5	20	25.93	25	63.64	20	52.94	60	55.56	7.69	16.67	18.18	57.14	17.65	28.57	35.48	44	23.81	16.28	26.09	28	37.5	17.07	44	7.69	46.15	23.53	30.77	11.9	33.33	7.69	35.71	20	55.56	12.5	45.45	25	55.56	15.79	42.86	27.27	50	8.57
DYRK4	HsaINT0053354	chr12:4605087-4607326	2240	chr12:4604914-4605086=4607327-4607387:+	IR-S	18.52	38.46	14.29	20	20	84.62	25	40.74	7.69	81.82	16.13	33.33	7.69	5.88	3.23	14.29	41.94	33.33	57.14	12.12	29.82	20	52.38	43.75	29.03	13.21	46.67	9.43	51.22	11.39	29.41	9.09	23.08	27.27	0	11.11	23.81	24.32	23.81	16.67	6.67	4.35	18.18	12
DZIP1	HsaINT0053443	chr13:95599425-95606002	6578	chr13:95606003-95606059=95599365-95599424:-	IR-C	25	0	20	6.67	26.32	30.77	11.11	14.29	20	34.62	33.33	50	50	5.88	18.18	20	60	42.86	57.14	4.35	55.56	30	50	21.74	100	12.5	77.78	23.53	25.93	28.57	28	35	71.43	38.46	33.33	33.33	25.93	20	71.43	11.11	20	5.88	46.67	50
DZIP1L	HsaINT0053471	chr3:138088508-138092382	3875	chr3:138092383-138092544=138088379-138088507:-	IR-S	33.33	78.57	16.67	70.91	27.27	60	11.11	70.59	0	81.25	50	82.98	14.29	85.71	60	25.71	60.61	11.63	33.33	36.84	56	50	58.82	16.13	47.17	12.82	83.33	21.74	53.57	18.52	38.18	100	33.33	0	45.45	25	100	33.33	50	60	45.45	0	60	0
DZIP3	HsaINT0053487	chr3:108648113-108648917	805	chr3:108647943-108648112=108648918-108648962:+	IR-S	8.11	46.67	17.65	61.29	21.21	63.64	12.82	80	9.68	67.35	13.04	60	21.21	69.23	25.93	23.08	71.43	7.69	57.14	30.43	51.72	11.76	53.85	16.13	66.67	20	83.33	33.33	36.36	5.56	72.73	10.34	33.33	17.39	11.11	17.95	42.86	13.33	42.86	0	26.32	13.33	10.34	14.29
E2F4	HsaINT0053531	chr16:67192871-67193008	138	chr16:67192761-67192870=67193009-67193170:+	IR-S	6.36	73.53	8.48	71.19	6.73	74.2	6.28	64.82	10.17	80.3	6.27	73.56	9.59	79.75	8.45	7.35	44.86	5.41	55.18	11.12	58.71	14.75	72.35	13.28	59.1	8.25	54.97	8.02	56.27	4.54	41.81	29.29	80.2	29.12	69.22	19.84	69.22	25.13	70.48	17.73	70.33	20.75	77.09	20.15
EARS2	HsaINT0053616	chr16:23523418-23523510	93	chr16:23523511-23524454=23522013-23523417:-	IR-S	94.44	85.45	100	94.52	96.32	92.86	86.21	89.09	97.32	91.67	85.94	87.1	94.16	95.83	91.37	91.49	69.01	87.39	65.52	85.6	92.41	91.4	81.82	94.03	85.19	93.75	73.33	90.7	85.71	83.91	73.77	93.33	84.62	70.59	76.47	80.49	78.95	89.74	66.67	82.61	64.71	86.05	77.78	78.26
EBNA1BP2	HsaINT0053690	chr1:43172142-43172279	138	chr1:43172280-43172570=43172053-43172141:-	IR-S	98.26	92.94	95.16	91.58	94.89	100	97.78	94.74	96.55	93.65	100	90.12	95.08	77.78	94.26	95.42	75.76	83.74	79.71	86.1	92.75	94.2	90.48	88.96	89.38	96.49	82.98	95.28	89.36	91.67	89.19	93.71	100	97.39	97.5	99.03	100	100	100	97.37	100	98.69	97.65	97.89
ECHDC2	HsaINT0053798	chr1:52905091-52907867	2777	chr1:52907868-52907954=52905034-52905090:-	IR-S	40.74	73.97	17.07	60	41.18	65.52	30	81.1	24.14	68.75	29.73	70.67	18.31	69.15	40.43	38.46	64.71	22.22	64.71	15.15	56.25	20	66.67	50	70	40	56.52	25	63.64	27.27	65.71	66.67	100	42.86	100	100	60	11.11	100	100	81.82	60	100	33.33
EDC3	HsaINT0053930	chr15:74635627-74640465	4839	chr15:74640466-74640619=74635409-74635626:-	IR-S	10.56	58.14	14.62	29.55	12.99	52.54	11.9	56.86	15.66	36.59	6.51	51.72	12.5	47.37	10.24	17.24	29.31	22.51	45.45	13.91	47.59	18.92	41.33	15.53	36.28	17.77	32.04	15.62	48.31	9.89	33.33	14.69	29.41	21.57	39.39	18.68	27.27	18.41	20.48	21.74	26	13.37	33.82	15.27
EDC4	HsaINT0053949	chr16:67881846-67881953	108	chr16:67881668-67881845=67881954-67882109:+	IR-S	18.64	66.57	21.33	67.14	21.52	62.72	19.7	67.46	17.73	64.15	27.27	68.77	16.39	63.53	25.68	3.3	49.4	8.89	56.04	12.78	59.06	24	65.38	19.1	64.65	15.28	63.6	15.91	60.34	16.48	48.99	19.23	59.89	28.7	61.27	12.66	49.03	15.86	51.65	15.62	56.87	15.62	56.65	12.45
EEF1B2	HsaINT0054097	chr2:206159685-206159912	228	chr2:206159594-206159684=206159913-206160059:+	IR-C	70	80.22	67.16	68.42	73.52	76.58	70.52	81.58	75.24	71.13	62.11	60.49	71.78	80	69.23	63.04	65.22	61.03	77.08	68.6	79.59	68.86	68.09	67.49	75.61	71.79	81.82	79.15	84.07	53.61	70.37	86.11	83.73	88.48	89.37	81.7	89.25	88.84	84.05	84.78	91.81	86.21	88.41	87.03
EEF2K	HsaINT0054146	chr16:22263188-22264817	1630	chr16:22263110-22263187=22264818-22264880:+	IR-S	0	45.45	1.37	21.74	0	22.22	1.33	34.88	2.94	25	0	55.56	0	44.44	1.2	15.56	81.82	35	70.59	16	39.24	8	60	2.22	29.17	12.9	40	10.64	56.25	20	77.27	18.18	60	18.18	46.67	35	48.57	28	55.56	14.29	60	22.22	53.33	18.75
EEF2K	HsaINT0054147	chr16:22264881-22266389	1509	chr16:22264818-22264880=22266390-22266524:+	IR-S	9.09	75	4.92	48.72	15.62	60	5.08	48.57	8.11	69.7	10.2	46.34	1.75	100	4.76	47.83	70.73	50	95	24.53	52.94	11.11	70.37	18.37	34.88	10	79.31	15.79	55.17	45.45	76.92	14.29	76.47	29.41	100	38.46	75	73.33	82.61	22.22	100	25.93	84.62	30.77
EEF2K	HsaINT0054148	chr16:22266525-22266687	163	chr16:22266390-22266524=22266688-22266876:+	IR-S	0	39.57	0	32.93	3.79	39.98	1.89	38.26	3.29	41.18	0	63.16	2.22	37.05	1.3	19.83	52.2	15.9	55.21	13.25	40.68	12.69	45.74	17.77	28.79	22.96	34.73	4.29	25.81	16.53	64.87	28.13	83.17	21.54	59.69	22.48	63.4	57.51	61.64	39.91	57.58	38.9	67.41	25.69
EFEMP2	HsaINT0054317	chr11:65871364-65871969	606	chr11:65871970-65872018=65871157-65871363:-	IR-S	7.14	34.09	33.33	47.22	0	49.02	7.14	53.25	20	66.15	18.18	66.67	12.5	52	15.79	17.14	60.38	12.2	56.36	18.03	52.52	11.71	53.69	9.68	35.78	16.05	56.14	10.64	54.12	18.92	54.14	7.94	25.71	18.75	31.58	25	30.12	15.15	19.48	11.11	39.53	12.5	27.91	6.85
EFHC1	HsaINT0054367	chr6:52452838-52454094	1257	chr6:52452688-52452837=52454095-52454287:+	IR-S	21.74	96.49	20	88.57	26.67	93.26	13.04	90.32	25.93	98.04	21.74	100	29.41	86.36	66.67	41.94	85.88	53.12	89.87	31.71	89.57	37.5	87.5	45.1	83.72	39.13	88.1	45.71	88.41	45.45	85.88	63.64	90.77	69.49	82.46	80.65	68.42	65.96	93.55	39.53	81.82	68.42	91.18	65.85
EFNA3	HsaINT0054402	chr1:155079070-155085090	6021	chr1:155078872-155079069=155085091-155085404:+	IR-S	13.21	44.83	4.62	30.77	22.22	62.5	3.7	35.71	12	38.46	28	33.33	12.2	14.29	9.24	21.21	13.33	6.25	31.43	8.11	32	3.07	27.27	25.49	30.43	63.64	33.33	25.93	47.37	27.27	14.29	1.24	4.22	1.32	7.08	1.25	6.84	0.7	7.01	0.92	8.77	4.42	18.45	2.11
EHBP1L1	HsaINT0054686	chr11:65590593-65591799	1207	chr11:65590493-65590592=65591800-65591873:+	IR-S	0	73.77	33.33	81.48	0	84.91	20	84.16	4.76	92.59	0	84.62	13.33	79.55	15.38	15.79	73.91	16.67	81.48	20	77.08	15.38	88.24	5.88	72.22	55.56	74.03	9.09	84.62	10	63.27	29.41	76.64	21.21	72.81	29.03	74.83	25.42	70.93	18.18	79.81	31.03	78.24	42.86
EIF2AK4	HsaINT0054853	chr15:39976845-39978077	1233	chr15:39976414-39976844=39978078-39978147:+	IR-S	7.84	30	16.67	34.62	9.62	21.95	32.58	57.14	3.6	32.14	1.41	6.98	17.65	41.18	9.76	23.08	28.57	10.53	41.18	6.9	17.46	19.48	42.86	1.75	2.7	0	0	6.85	18.92	21.74	30	18.52	14.29	5.26	55.56	10.64	33.33	11.76	22.58	14.29	0	0	0	7.69
EIF2B1	HsaINT0054893	chr12:123624863-123626424	1562	chr12:123626425-123626493=123624787-123624862:-	IR-S	4.58	43.59	5.95	58.33	4.55	58.73	5.21	60	6.42	59.35	8.29	77.78	6.55	62.67	9.86	17.46	78.05	24.66	53.19	9.8	71.58	11.95	69.01	8.97	52.08	7.62	65.22	14.63	58.1	18.7	61.47	13.94	38.46	12.75	32.53	13.48	44.68	17.11	39.47	18.75	45.61	8.81	39.87	11.41
EIF4G3	HsaINT0055350	chr1:21176359-21176721	363	chr1:21176722-21176847=21176175-21176358:-	IR-S	26.53	77.14	21.95	54.76	14.67	68.67	14.67	54.55	25	46.15	12.82	69.23	20.51	64.29	23.81	8.74	52.94	27.27	41.94	16.88	57.66	28.68	68.57	34	37.66	22.35	57.33	26.19	53.25	18.28	42.22	35.45	60.87	55.56	62.79	27.91	59.38	33.04	62.32	46.1	54.43	23.6	44.12	33.77
EIF4H	HsaINT0055387	chr7:74190307-74194740	4434	chr7:74190247-74190306=74194741-74194878:+	IR-C	10.32	70.73	7.09	29.2	10.06	54.24	11.5	74.29	10.28	36.26	12.3	55	7.57	76.47	15.57	10.53	34	9.92	19.23	7.89	29	8.1	36.45	5.56	32.73	10.66	27.27	12.54	25.18	7.09	21.57	28.97	48.57	21.54	38.46	16.38	25.77	22.69	56.25	14.73	37.21	16.03	37.63	14.79
EIF5	HsaINT0055392	chr14:103335186-103335652	467	chr14:103334899-103335185=103335653-103335932:+	IR-C	86.67	100	87.5	100	81.82	100	100	100	100	100	100	91.84	100	100	100	100	100	91.3	100	91.67	100	100	100	92.86	96.61	100	100	100	100	100	100	81.82	100	100	100	100	100	88.89	100	100	100	100	100	85.71
ELAC2	HsaINT0055448	chr17:13005102-13005752	651	chr17:13005753-13005825=13004989-13005101:-	IR-S	5.26	73.06	7.41	46.07	6.25	58.44	10.67	70.83	6.15	57.53	14.77	80.85	9.09	69.23	18.11	13.92	69.52	18.52	67.01	18.52	55.44	19.3	74.19	10.81	46.15	5.56	63.24	12.64	60.27	24.32	81.82	10.77	21.82	6.12	25	7.14	28.26	9.09	28.57	8.33	27.87	12.73	25.17	14.81
ELAVL2	HsaINT0055482	chr9:23692885-23701378	8494	chr9:23701379-23701604=23690105-23692884:-	IR-C	9.09	84.62	0	11.11	7.14	26.67	5	68.42	2.13	61.29	6.98	79.31	5.66	86.67	10	5.66	42.86	5.68	27.27	3.85	38.74	3.67	47.17	4.64	28	3.7	37.31	5.56	54.55	8.77	30.1	9.92	80.68	11.93	52.54	11.81	60.66	7.28	47.97	8.7	51.61	8.82	57.78	11.41
ELMO2	HsaINT0055634	chr20:46380304-46383415	3112	chr20:46383416-46383494=46380253-46380303:-	IR-C	50	77.78	3.45	61.29	12.5	68.42	14.89	72.22	18.92	53.49	15.79	68.75	23.81	71.43	35.71	37.93	58.06	23.4	76.81	30.77	63.51	24.32	64.38	8.33	50.94	20	54.43	16.28	50.82	31.03	71.01	73.91	90.91	89.47	72.73	80	100	83.33	100	60	100	48.15	92.86	78.95
ELMOD3	HsaINT0055674	chr2:85355717-85356601	885	chr2:85355555-85355716=85356602-85356667:+	IR-C	100	95.24	100	100	100	100	100	100	100	100	100	100	100	100	100	100	100	100	100	100	100	100	100	100	100	100	100	100	100	100	100	100	100	100	100	100	100	100	100	100	100	100	100	100
ELMOD3	HsaINT0055682	chr2:85357253-85362185	4933	chr2:85356967-85357252=85362186-85362260:+	IR-S	25	29.73	0	30.43	29.41	26.67	3.23	50	10	24.53	4.35	36.36	4.76	68.42	22.22	28.57	37.5	27.27	14.29	36	21.74	0	18.52	15.79	26.67	33.33	29.41	8.33	33.33	30	15.79	0	2.04	3.23	4.35	0	15.38	0	5.56	0	1.96	4.35	1.89	9.09
ELOVL6	HsaINT0055756	chr4:110198368-110198521	154	chr4:110198522-110198615=110198247-110198367:-	IR-S	63.41	70.49	47.57	72.04	62.25	77.59	74.41	88.24	69.29	74.86	61.57	76.36	50.39	71.93	60.59	52.89	55.29	56.59	62.24	63.43	66.56	72.61	63.46	73.7	69.81	61.62	67.3	62.01	62.58	57.17	56.44	82.86	86.21	89.39	71.43	77.53	87.5	92.08	92.86	90.12	92	88.81	83.78	78.82
ELP2	HsaINT0055784	chr18:36138873-36141136	2264	chr18:36138795-36138872=36141137-36141201:+	IR-S	2.08	26.67	0.72	18.52	0	19.05	1.43	26.09	1.33	14.29	1.3	24	1.89	44.44	1.45	20	26.32	6.85	25.93	11.63	41.46	15.15	60	27.27	44	9.43	40	16.98	58.33	16.67	41.18	11.11	44.44	7.14	29.41	7.69	20	26.32	38.46	15.79	20	21.05	20	5.26
EML2	HsaINT0055960	chr19:45615890-45616460	571	chr19:45616461-45616558=45615802-45615889:-	IR-C	51.84	60.07	30.28	65.15	22.5	61.88	35.24	78.7	37.47	78.66	35.66	78.68	33.17	79.43	27.07	53.42	83.45	54.57	84.88	27.4	79.66	31.94	80.09	53.5	63.13	50.67	71.88	37.52	73.69	36.35	78.72	6.03	47.83	14.5	58.94	8.71	48.99	16.51	61.08	10.86	50.71	13.55	60.98	2.38
ENGASE	HsaINT0056246	chr17:79083952-79084537	586	chr17:79083761-79083951=79084538-79084686:+	IR-S	3.57	57.62	8.7	68.15	7.32	59.62	6.12	55.81	2.13	53.32	8.47	69.44	5.88	54.18	18.37	24.71	82.74	25.45	75.94	12.38	77.6	20.79	70.45	10.59	60	17.43	68.75	21.28	72.13	16.67	83.27	7.56	48.87	9.92	60.59	13.43	66.87	4.7	53.6	10.09	46.63	9.77	60.7	5.48
ENGASE	HsaINT0056255	chr17:79082064-79083019	956	chr17:79081898-79082063=79083020-79083123:+	IR-C	3.33	56.93	14.29	68.85	8.2	61.36	50	87.11	12.5	42.12	14.29	69.51	31.03	54.55	22.22	28.57	69.9	38.1	81.82	31.11	58.16	28	60.49	11.9	38.17	20	58.02	34.07	57.58	39.13	70.95	7.14	27.27	3.7	28.06	6.25	33.5	10	31.05	1.66	25.52	2.41	28.72	2.41
ENO2	HsaINT0056275	chr12:6914660-6915820	1161	chr12:6914450-6914659=6915821-6915917:+	IR-C	18.81	90.26	20.71	81.76	12.15	80.45	9.02	85.26	17.59	83.49	9.59	87.73	24.18	80.42	25.6	26.73	76.61	27.92	77.34	22.17	71.42	33.9	77.36	49.78	74.36	17.33	71.57	12.52	68.59	19.1	72.4	15.49	33.76	15.01	35.06	13.03	36.06	12.81	41.22	19.35	35.44	9.56	37.36	8.59
ENO3	HsaINT0056296	chr17:4955605-4955941	337	chr17:4955407-4955604=4955942-4956143:+	IR-C	47.37	94.77	18.18	91.49	31.03	88.17	27.78	94.87	26.83	93.41	50	97.65	61.9	93.98	25.58	28.57	91.11	32.31	77.78	19.12	87.31	24.49	91.16	37.35	85.52	21.82	82.74	32.39	85.65	29.8	84.88	28.21	75	12.5	60	15.79	58.97	20	84	21.74	60.53	14.29	62.86	18.64
ENOSF1	HsaINT0056312	chr18:690632-691067	436	chr18:691068-691106=690549-690631:-	IR-S	22.54	49.85	24.68	46.66	31.94	55.47	35.56	78.68	10.08	34.72	29.61	75.96	21.07	48.88	43.55	37.34	69.35	22.2	50.65	33.14	60.31	31.96	66.48	19.35	51.42	43.76	65.81	46.68	64.73	62.29	69.88	31.37	62.71	40.87	54.98	51.95	63.95	59.95	59.37	29.37	51.66	29.13	72.46	32.04
ENOSF1	HsaINT0056314	chr18:686009-688573	2565	chr18:688574-688608=685921-686008:-	IR-S	11.24	36.19	8.36	21.39	9.45	48.08	12.2	31.22	4.94	34.9	3.61	28.21	20.45	33.41	22.75	28.42	61.44	14.29	25.74	23.08	39.94	7.64	21.4	12.31	17.91	10.28	20.45	16.17	34.89	27.04	53.52	33.33	41.18	13.33	32.93	52	60.26	15.25	13.42	8.68	22.11	7.14	20.23	18.52
ENSA	HsaINT0056467	chr1:150625809-150626478	670	chr1:150626479-150626526=150625642-150625808:-	IR-C	4.17	60	5.26	5.88	0	55.56	14.29	52.94	10.34	40.74	42.86	100	2.7	0	30.43	75	100	23.81	100	9.09	100	40	14.29	27.27	50	100	100	50	63.64	42.86	100	77.78	75	66.67	100	62.5	77.78	100	100	50	63.64	100	100	100
ENTPD4	HsaINT0056507	chr8:23434479-23435391	913	chr8:23435392-23435477=23434317-23434478:-	IR-S	30.16	81.36	28.57	79.2	29.23	74.5	66.04	92.86	20.55	84.72	35.63	85.48	42.86	82.8	69.7	52.38	72.68	40.3	79.73	31.94	69.86	38.33	83.18	30.23	48.21	23.64	65.29	33.33	67.38	61.74	71.93	8.16	14.63	10.34	12.12	5.94	30.61	17.48	35.42	8.45	19.64	6.14	19.7	5.43
ENTPD6	HsaINT0056534	chr20:25221334-25222837	1504	chr20:25221232-25221333=25222838-25222978:+	IR-C	22.81	91.52	14.85	81.31	10.11	80.72	33.33	96.79	14.29	84.27	13.64	90.65	19.57	83.23	31.37	28	82.09	32.04	87.3	16.44	82.22	20.97	90.48	14.71	69.92	22.41	76.13	17.95	78.42	27.43	78.83	10.23	48.33	16.74	53.19	20.25	55.36	14.77	44.08	15.65	46.86	10.79	57.46	5.19
ENY2	HsaINT0056570	chr8:109339391-109340443	1053	chr8:109339320-109339390=109340444-109340563:+	IR-C	100	100	60.58	75.27	75.36	100	55.84	100	54.36	83.69	78.27	100	40.35	100	75.45	47.85	71.9	62.48	100	27.85	50.61	57.68	33.98	44.81	64.21	26.41	71.9	50.49	82.2	84.86	75.36	13.27	50.51	26.77	50.61	43.41	14.47	29.57	33.98	17.07	33.72	23.51	40.35	20.47
EP300	HsaINT0056586	chr22:41158501-41160641	2141	chr22:41158412-41158500=41160642-41160722:+	IR-S	9.09	35.9	16.5	31.45	16.18	31.88	11.49	46.11	11.9	17.65	10.76	40.74	7.61	58.33	5.04	16.67	48.98	42.72	72.6	20	36.62	18.07	25.93	20.68	33.77	13.79	36.56	15.82	40.48	23.08	62.54	11.76	13.46	18.92	23.73	17.09	17.36	14.84	45.54	8.71	27.54	12.6	32.93	12.95
EP400NL	HsaINT0056658	chr12:132084400-132085256	857	chr12:132084283-132084399=132085257-132085316:+	IR-C	76.47	100	52.94	82.61	75	87.88	72.97	94.12	68.75	92	90.48	90.91	54.55	81.82	73.33	100	87.5	100	100	88.68	89.33	93.1	94.44	61.29	75	87.88	75.61	92.31	100	92.16	78.38	90.91	88.24	73.91	64.71	50	86.67	65	65.52	52	100	76.92	80.95	100
EP400NL	HsaINT0056661	chr12:132108683-132114457	5775	chr12:132108572-132108682=132114458-132114545:+	IR-C	100	88.57	100	100	81.82	76.47	100	100	71.43	73.91	100	80	100	88.24	81.82	100	100	100	100	100	84	70.59	91.67	100	67.74	94.12	81.25	85.71	94.12	100	100	81.82	100	100	100	75	100	100	84.62	86.67	100	73.33	88.24	100
EPB41	HsaINT0056684	chr1:29058646-29058810	165	chr1:29058589-29058645=29058811-29058852:+	IR-C	33.33	100	17.51	79.77	17.51	85.6	7.49	100	24.46	66.31	10.83	79.65	100	100	77.56	32.84	74.55	11.65	86.59	12.55	34.67	4.68	53.95	14.05	42.53	11.23	49.73	36.2	71.01	24.6	66.24	0.59	18.81	2.64	15.9	1.89	6.55	5.14	3.89	0.91	13.62	2.4	15.54	1.45
EPB41L3	HsaINT0056766	chr18:5394794-5395066	273	chr18:5395067-5395147=5394677-5394793:-	IR-S	5.26	63.64	7.69	62.5	20	71.43	15.79	82.61	16.13	77.78	10	66.67	9.68	83.33	33.33	11.11	73.33	35.48	53.85	22.58	73.91	33.33	42.86	25	44.44	33.33	33.33	7.69	33.33	29.41	40	14.08	41.8	11.11	50	12.33	44.58	14.75	51.15	33.33	57.14	7.14	53.85	8.51
EPHX2	HsaINT0057169	chr8:27544245-27544443	199	chr8:27544186-27544244=27544444-27544969:+	IR-S	13.04	39.73	14.29	63.27	13.33	53.85	13.21	39.73	31.03	50.88	9.8	46.15	21.43	66.04	18.92	26.15	44.29	21.13	44.36	13.51	41.63	7.46	36	18.18	54.9	5	31.37	25.33	52.46	22.39	44	61.9	41.38	10	31.71	11.76	51.22	13.51	37.78	23.08	33.33	16.67	55.56	27.27
EPHX2	HsaINT0057174	chr8:27511911-27515717	3807	chr8:27511836-27511910=27515718-27515813:+	IR-S	0	94.29	7.69	80.65	3.7	82.22	20	92.86	33.33	100	22.58	87.23	28.57	73.91	15.38	24.59	82.72	14.81	82.8	18.52	73.55	14.29	72	7.69	64.91	13.85	63.33	35.71	72.6	25	84.62	50	69.23	38.46	76	50	60	25	62.96	28.57	80	35.48	57.89	20
EPOR	HsaINT0057234	chr19:11380972-11381055	84	chr19:11381056-11381209=11380884-11380971:-	IR-S	10.11	1.85	12.5	4.42	28.57	32.73	18.68	3.48	16.92	2.19	11.54	2.29	4.95	1.6	4.13	27.27	15.79	20	37.5	62.5	87.58	12.5	2.13	60	33.33	41.67	37.5	21.74	20	50	14.29	14.29	20	16.67	17.65	47.83	72.73	23.08	0	55.56	27.27	23.08	23.08	27.27
EPOR	HsaINT0057236	chr19:11378596-11378690	95	chr19:11378691-11378778=11377205-11378595:-	IR-S	11.11	11.02	28.21	14.54	19.23	10.17	10.34	9.18	20	10.47	24.68	4.18	15.97	7.57	13.64	73.33	71.43	83.33	33.33	20	44	18.92	15.79	39.39	44	33.33	36.36	33.33	35.71	52	40	36.84	62.5	40.74	29.41	29.41	60	15.79	50	45.45	33.33	33.33	45.45	45.45
ERBB2	HsaINT0057500	chr17:39693326-39694987	1662	chr17:39693261-39693325=39694988-39695181:+	IR-S	60	100	50	89.47	42.86	38.46	40	89.47	100	88.89	22.22	63.64	33.33	75	29.41	38.46	77.14	30.77	65.52	12.5	56.52	38.46	38.46	21.21	58.82	12	68.75	11.63	39.53	45.45	47.06	0	0	0	6.67	0	6.67	7.69	4.76	14.29	39.13	0	0	0
ERCC2	HsaINT0057634	chr19:45370233-45370535	303	chr19:45370536-45370587=45370133-45370232:-	IR-S	24.32	16.43	13.33	13.92	13.4	14.7	20.48	19.3	20.39	21.7	17.86	22.42	12.73	19.27	11.5	11.36	11.24	16.83	10.73	23.08	15.26	26.32	20.43	34.25	24.32	20.45	25.41	9.52	11.11	10	14.52	58.14	45.45	44.72	45.45	56.6	43.59	48.45	68	49.12	56	39.34	63.11	46.07
ERCC3	HsaINT0057663	chr2:127290274-127292609	2336	chr2:127292610-127292846=127290224-127290273:-	IR-C	0	52.94	6.25	57.89	6.98	69.64	8.11	75.9	10.64	68.18	9.33	74.19	6.38	48.72	20	49.02	82.72	37.04	92.31	47.06	88.98	35.29	91.3	25.42	80.18	22.03	80.49	21.65	79.63	32	80.85	5.26	48.84	11.11	43.4	16.28	53.19	4.92	50.94	13.64	46.15	13.85	75.44	5
ERCC3	HsaINT0057664	chr2:127289825-127290223	399	chr2:127290224-127290273=127289689-127289824:-	IR-S	6.98	73.77	9.47	75.86	12.96	83.02	12.61	86.18	9.68	74.7	7.07	87.37	10.53	75.47	18.28	39.47	84.31	32.47	88.06	44.44	94.53	24.56	94.44	34.09	82	32.81	87.29	30.53	85.96	35.63	86.02	22.77	56.99	18.75	63.27	27.54	64.21	17.95	69.89	21.05	67.83	22.95	72.31	29.03
ERCC4	HsaINT0057678	chr16:13935744-13937765	2022	chr16:13935146-13935743=13937766-13937858:+	IR-S	52.94	100	47.83	20	77.78	71.43	68	84.62	81.82	60	46.67	80	47.83	100	50	87.5	100	89.47	80	54.55	66.67	28	0	50	11.11	42.86	69.23	33.33	40	83.33	71.43	25	38.46	20	60	26.32	9.09	33.33	60	25	66.67	18.52	38.46	14.29
ERCC8	HsaINT0057716	chr5:60887521-60890888	3368	chr5:60890889-60891086=60887440-60887520:-	IR-S	13.33	40	5	50	18.37	35	24.44	75.76	10.14	52	16.36	33.33	20	35.14	32	52.94	72.73	17.24	80	16.67	57.14	33.33	57.14	15.38	37.93	25	52	57.14	72.73	53.85	66.67	18.52	44.44	11.11	23.81	20	40	4	33.33	25	7.69	0	12	13.04
ERCC8	HsaINT0057725	chr5:60891087-60898275	7189	chr5:60898276-60898400=60890889-60891086:-	IR-S	17.65	20	9.09	20	16.67	36	11.11	37.5	0	37.93	7.32	57.89	6.38	80	25.71	53.85	76.47	33.33	33.33	5.88	35.48	6.67	50	8.33	33.33	15.79	25	22.22	55.56	33.33	80	15.38	20	4.35	27.27	12.5	13.04	4	10.34	17.65	16.67	5.88	0	11.11
ERI3	HsaINT0057802	chr1:44352926-44354891	1966	chr1:44354892-44355267=44352850-44352925:-	IR-S	20.93	70	14.75	65.22	10.77	46.34	9.8	75	25	81.82	24.24	76.74	23.4	68.75	16.81	17.24	57.14	15.15	37.5	12.68	47.95	5.88	43.75	19.48	36	16.67	26.92	12.5	48.15	27.87	38.46	3.61	16.36	6.85	21.21	8.16	19.05	6.85	19.05	6.38	13.04	5.88	23.08	8.7
ERRFI1	HsaINT0057971	chr1:8014397-8015307	911	chr1:8015308-8015384=8011719-8014396:-	IR-S	7.96	41.67	7.46	25.42	6.54	47.06	20.63	53.85	7.43	49.25	8.93	58.33	6.09	50	8.06	24.14	47.83	37.14	56.25	21.43	49.15	24.39	58.62	23.81	76	21.15	38.89	19.05	33.33	39.13	51.72	8.77	39.13	31.25	28.57	10.71	33.33	16.42	25.71	16.13	17.39	20	20.93	24
ESRRA	HsaINT0058137	chr11:64305737-64307167	1431	chr11:64305572-64305736=64307168-64307504:+	IR-C	5.08	66.67	11.76	67.74	25	91.67	13.04	81.82	13.79	88.73	7.69	66.67	24.32	65	4.76	14.29	39.13	13.33	37.93	15.38	64	6.67	67.44	16.13	58.62	40.74	54.55	22.22	41.94	28.57	50	9.09	47.37	17.65	42.42	18.37	55.93	18.07	39.29	28	54.1	19.3	50.59	20
ETAA1	HsaINT0058244	chr2:67397672-67399168	1497	chr2:67397310-67397671=67399169-67399297:+	IR-S	12.5	57.14	14.29	37.5	20	46.34	24.24	55.56	12.73	37.5	16.98	77.78	17.53	62.5	22.22	44.62	42.86	33.33	54.84	22.73	43.24	22.22	68.42	17.17	39.53	27.27	41.67	21.74	54.55	50	70	10.34	33.33	23.53	28.57	14.29	15.79	24.44	26.32	12.5	50	13.04	13.04	8.11
ETFDH	HsaINT0058274	chr4:158672491-158680466	7976	chr4:158672125-158672490=158680467-158680607:+	IR-C	14.29	100	20	20	20	50	28.57	100	81.82	53.85	18.52	50	33.33	100	50	60	100	57.14	15.79	37.5	71.43	45.45	0	11.11	23.08	52.94	27.27	33.33	55.56	66.67	71.43	42.86	33.33	14.29	0	25	16.67	25	0	60	50	0	50	6.67
ETFDH	HsaINT0058278	chr4:158680608-158682194	1587	chr4:158680467-158680607=158682195-158682424:+	IR-C	20	47.83	3.7	46.67	6.25	100	5.56	61.54	18.18	50	26.67	47.83	25	53.85	12.82	21.43	83.33	40	33.33	17.65	50	0	100	18.18	33.33	12.5	75	23.81	11.11	42.86	75	0	33.33	0	20	20	33.33	27.27	60	0	60	9.09	33.33	9.09
EVI5L	HsaINT0058474	chr19:7863281-7863423	143	chr19:7863185-7863280=7863424-7864976:+	IR-S	13.16	41.18	11.11	28.57	11.11	37.14	8.33	34.02	8.7	24.32	9.3	35.14	17.5	50.82	23.6	11.11	20.93	13.79	14.71	19.3	36.42	21.62	29.7	18.18	29.55	3.23	15.62	4.35	26.32	5.26	11.54	17.09	28.77	10.14	21.54	12.6	26.55	7.8	28.05	6.48	19.32	7.52	19.32	6.02
EWSR1	HsaINT0058539	chr22:29288787-29290412	1626	chr22:29288606-29288786=29290413-29290683:+	IR-C	100	100	100	100	97.65	100	100	100	100	100	97.65	100	100	100	100	100	98.9	100	100	100	100	100	100	100	100	100	100	100	98.79	100	100	100	99.13	98.28	100	100	98.73	100	99.03	100	100	100	100	97.59
EXD3	HsaINT0058588	chr9:137373600-137383312	9713	chr9:137383313-137383377=137373426-137373599:-	IR-S	0	64.66	0	64.06	3.23	51.27	0	46.59	0	58.33	0	58.79	0	72.19	9.09	1.82	27.06	8.33	31.11	5.56	35.95	13.33	39.76	21.21	53.03	20	40.46	23.08	58.18	8.47	33.33	40	70.53	46.67	76.7	25	47.69	55.56	75.47	28.57	64.71	20	62.11	21.74
EXD3	HsaINT0058591	chr9:137366633-137367935	1303	chr9:137367936-137367989=137366493-137366632:-	IR-S	15.38	74.35	3.03	71.71	0	77.08	31.03	88.7	20	76.21	20	93.35	14.29	80.75	70	28.46	65.99	39.02	59.4	24.73	60.99	24.53	62.21	14.29	52.94	16.92	50.14	14.55	56.23	30.32	69.13	7.69	25	25	12.82	15.62	35.37	15.56	21.58	5.26	26.85	3.03	22.5	12
EXD3	HsaINT0058592	chr9:137356369-137366492	10124	chr9:137366493-137366632=137356268-137356368:-	IR-C	33.33	87.28	25	72.73	0	74.36	100	88.61	33.33	75.86	100	80.95	50	96.46	100	33.33	55.56	20	33.33	33.33	57.69	100	49.33	60	37.01	53.85	52.76	63.64	43.02	63.64	49.67	5.88	16.57	0	23.21	12	17.65	17.65	25	20	29.63	11.11	24.55	20
EXOC1	HsaINT0058612	chr4:55883929-55888887	4959	chr4:55883823-55883928=55888888-55888932:+	IR-C	0	30.43	9.68	35.71	2.13	31.03	14.29	37.14	0	26.67	5	36	12	25.71	9.09	33.33	38.18	19.23	45.45	19.05	34.69	18.75	25	18.92	39.39	14.29	31.25	36.84	23.81	11.11	36.84	7.46	11.11	4.88	10.53	6.67	2.56	2.78	18.18	4.35	19.05	4.55	6.9	9.09
EXOC3	HsaINT0058666	chr5:459460-461959	2500	chr5:459359-459459=461960-462070:+	IR-S	16	81.25	5.41	73.49	5	78.02	5.26	87.72	4.92	92.92	10.34	87.23	10.34	96.77	17.86	38.89	92.68	42.11	93.26	16.67	86.67	20.83	74.47	24	90	9.52	79.03	30.56	86.41	27.27	79.78	8.82	53.85	25	50	17.24	68.57	12.94	58.54	3.7	54.84	13.85	56.82	8.7
EXOC7	HsaINT0058785	chr17:76091236-76094413	3178	chr17:76094414-76094581=76091143-76091235:-	IR-C	27.27	91.78	70	95.42	28.57	96.23	33.33	96.97	33.33	84.75	50	98.28	71.43	100	46.67	45.45	100	46.15	91.84	54.84	89.68	31.82	84.81	41.82	77.32	45.16	86.61	75	95.59	80	89.61	14.62	62.54	16.33	55.77	17	65.92	18.14	59.12	15.44	56.2	12.65	65.53	13.85
EXOC7	HsaINT0058786	chr17:76089321-76091142	1822	chr17:76091143-76091235=76089175-76089320:-	IR-C	40	97.65	55.56	100	84.62	100	33.33	100	46.15	100	52.94	100	85.71	100	66.67	50	91.92	63.64	96.15	63.16	94.74	27.73	96.75	52	94.64	52.17	93.66	70	98.9	63.64	95.56	15.79	69.59	23.67	81.22	22.14	80.04	24.34	76.58	21.77	77.51	18.69	85.79	15.25
EXOG	HsaINT0058791	chr3:38496531-38497628	1098	chr3:38496272-38496530=38497629-38497778:+	IR-C	15.79	100	35.71	78.38	29.03	68	8.33	100	41.18	71.43	44.83	82.35	13.04	64.71	84.62	59.18	79.31	31.25	72.09	23.53	62.11	35.48	66.67	27.27	63.64	40	70.73	30	50	81.25	82.86	28	58.62	18.92	26.67	14.29	30.77	20.99	33.33	23.68	52.38	21.62	34.48	25.37
EXOG	HsaINT0058792	chr3:38497779-38501354	3576	chr3:38497629-38497778=38501355-38501494:+	IR-C	45.45	100	26.32	90	21.74	89.47	40	100	25	84.62	60	78.95	77.78	100	63.64	58.33	87.5	53.85	47.83	16.13	85.71	18.92	75	17.24	57.14	16.28	68.42	37.93	36.36	37.93	76.92	10.2	33.33	13.21	41.67	8.11	38.46	16.13	13.51	16.67	39.13	20	33.33	14.29
EXOSC10	HsaINT0058811	chr1:11077444-11077600	157	chr1:11077601-11077651=11077365-11077443:-	IR-S	1.9	57.02	1.36	47.83	3.3	54.29	2.63	60	3.41	60.15	0.83	53	4.39	53.14	4.13	14.69	75.71	17.1	69.58	12.94	60.37	5.82	56.67	10.66	43.57	4.08	51.81	13.64	68.38	17.65	67.48	6.1	45.19	7.62	37.4	10.26	44.22	15.56	45.88	6.29	50.19	7.08	52.74	5.13
EXOSC10	HsaINT0058812	chr1:11076949-11077364	416	chr1:11077365-11077443=11076842-11076948:-	IR-S	5.22	75.16	2.35	61.63	5.22	68.32	6.36	80.55	10.18	68.48	5.88	74.7	10.64	76.07	7.69	17.39	84.23	21.09	78.43	16.36	76.07	14.89	71.43	17.11	75.23	16.05	75.3	16.03	80.6	19.54	79.54	16.05	66.67	15.79	63.98	15.19	75.76	10	71.35	15.38	75.72	11.96	71.81	8.98
EXOSC2	HsaINT0058830	chr9:130697628-130698161	534	chr9:130697582-130697627=130698162-130698251:+	IR-S	8.08	62.86	13.57	35.38	9.73	37.98	5.88	37.61	9.64	43.62	9.27	35.25	9.71	50	10.61	25.79	57.41	25.81	51.35	18.99	39.89	21.43	52.81	13.16	52.54	17.28	46.39	19.79	46.67	14.48	43.59	11.36	29.17	12.5	32.14	12.82	46.15	6.67	44.44	32.14	43.75	11.58	46.27	19.3
EXOSC2	HsaINT0058832	chr9:130699395-130700866	1472	chr9:130699329-130699394=130700867-130700935:+	IR-S	4.65	43.18	11.96	41.32	8.76	50	5.26	37.6	11.11	48.39	10.66	39.68	10.38	40.54	7.83	15.38	42.11	23.87	49.61	15.03	51.24	19.48	47.83	11.11	38	21.83	50	15.23	35.63	10.59	26.03	20	35	32.53	33.33	38.03	28	22.58	32.2	25.93	32.26	29.73	36.47	14.29
EXOSC2	HsaINT0058833	chr9:130700936-130702133	1198	chr9:130700867-130700935=130702134-130702310:+	IR-S	11.27	68.1	13.45	67.38	18.8	75.28	7.31	68.49	6.02	59.59	12.51	55	4.93	60.29	9.38	15.55	48.94	27.14	50.89	28.42	58.25	15.36	51.71	25.05	39.5	23.49	39.53	22.55	47	9.32	38.58	11.11	53.25	20.95	29	19.85	42.6	12.08	52.53	29.31	35.95	23.4	34.69	17.24
EXOSC8	HsaINT0058854	chr13:37000823-37002272	1450	chr13:37000541-37000822=37002273-37002309:+	IR-S	7.58	20.24	5.84	23.89	7.89	37.18	4.05	18.72	13.07	28.33	5.66	22.66	6.29	33.33	9.39	16.72	32.31	20.39	38.77	17.76	32.98	13.5	42.59	14.62	38.13	13.21	38.51	20.67	52.18	13.82	33.03	16.78	46.28	15.6	37.78	21.91	15.83	44.2	54.71	22.83	32.58	18.67	38.46	20.9
EXOSC8	HsaINT0058858	chr13:37003008-37004515	1508	chr13:37002934-37003007=37004516-37004561:+	IR-S	8.85	68.18	7.41	52.29	11.28	58.97	10.66	70.86	6.48	65.52	11.76	53.23	14.92	64.81	12.09	25.17	45.21	25.87	54.79	18.65	57.14	19.83	64.38	22.02	56.63	23.46	54.76	20.68	54.84	22.52	50	15.25	48.15	27.91	47.06	26.03	31.82	19.54	52	12	56.67	16.67	33.33	19.44
EXOSC9	HsaINT0058865	chr4:121814048-121816143	2096	chr4:121813866-121814047=121816144-121816194:+	IR-C	27.27	85.45	15.2	74.36	25.33	78.31	24.71	77.78	20	75	29.73	92.45	24.44	96	26.76	63.38	86.05	56.41	77.78	47.37	92.31	46.43	83.33	55.22	70.49	75	91.84	65.38	73.08	52.38	95.74	45.45	89.47	57.89	81.82	88.24	66.67	75	84.62	46.67	87.5	69.23	100	50
EXOSC9	HsaINT0058866	chr4:121816195-121816368	174	chr4:121816144-121816194=121816369-121816447:+	IR-C	16.67	92.27	20.11	68.78	30.22	83.73	24.58	70.79	30.3	70.28	33.69	73.4	26.02	83.84	43.66	55.82	87.34	31.17	68.15	61.12	83.21	59.13	87.13	62.14	70.84	90.35	93.6	60.16	100	66.17	93.99	69.3	100	75.15	85.83	69.37	73.33	100	72.91	37.61	53.65	77.92	90.54	33.66
EZH1	HsaINT0059049	chr17:42702962-42703739	778	chr17:42703740-42703820=42702877-42702961:-	IR-C	50	90.48	56.92	89.25	44.44	75.28	59.38	66.27	51.11	72.41	46.15	89.47	65.96	72.09	51.85	72.55	83.72	63.33	86.41	66.67	76.36	76.92	86.49	55.17	72.41	44.62	69.62	64.52	74.71	75	81.82	61.64	71.43	60	65.71	54.22	89.83	69.23	75.76	59.42	74.68	51.16	71.43	56.1
EZH2	HsaINT0059063	chr7:148816779-148817221	443	chr7:148817222-148817391=148816684-148816778:-	IR-S	8.43	79.6	3.08	73.11	5.97	72.6	20	82.63	10.92	77.12	17.74	83.7	18.7	78.92	33.88	43.18	79.72	32.26	81.76	24.74	73.2	17.55	78.12	12.5	59.29	20	72.43	23.74	70.22	32.19	79.67	9.8	49.06	14.71	48.6	7.27	51.72	10.17	62.04	8.11	50	6.57	44.72	8.43
EZH2	HsaINT0059078	chr7:148817392-148817876	485	chr7:148817877-148818117=148817222-148817391:-	IR-C	5.32	76.96	7.11	73.72	4.45	73.9	22.84	82.29	11.55	76.55	14.17	86.17	14.75	77.17	17.24	34.37	71.55	30.62	68.09	16.43	70.42	14.99	59.49	11.26	52.52	17.3	63.91	25.16	58.66	30.14	73.28	4.11	43.78	10.27	40.94	10.98	37.85	6.47	40.11	7.76	37.78	4.62	49.65	9.19
FAAH	HsaINT0059254	chr1:46410498-46410813	316	chr1:46410398-46410497=46410814-46410854:+	IR-S	19.85	90.72	24.73	91.12	57.51	87.22	35.36	89	46.89	85.8	49.46	94.22	36.56	89.75	52.19	42.62	68.58	42.86	90.36	50	92.51	47.05	92.51	100	86.51	38.05	85.77	12.34	90.96	100	86.1	29.17	79.64	59.77	87.01	49.73	78.39	35.58	80.91	38.98	80.5	21.97	83.52	33.17
FAAH	HsaINT0059255	chr1:46410855-46411611	757	chr1:46410814-46410854=46411612-46411651:+	IR-S	19.51	69.52	48.95	65.23	19.16	71.09	36.27	76.12	24.16	80.93	5.71	69.16	26.47	75.22	17.73	19.51	78.33	0	58.01	39.09	68.55	32.65	77.17	13.91	80.2	54.5	84.32	49.23	80.9	48.86	85.78	7.48	61.58	32.22	70.1	32.16	48.12	19.31	56.86	43.6	64.24	38.91	66.16	19.51
FADS3	HsaINT0059338	chr11:61876964-61877510	547	chr11:61877511-61877587=61876866-61876963:-	IR-S	5.79	66.49	7.69	65.64	9.09	74.79	15.79	76.41	6.25	67.69	13.33	78.29	12.5	64.12	27.56	23.4	75.35	33.33	78.12	5.88	63.78	16	66.52	11.11	62.35	6.67	63.93	9.38	72.76	30.16	78.81	26.96	49.37	0	61.4	26.92	62.5	9.76	57.26	0	47.17	8.11	53.23	10.77
FADS3	HsaINT0059339	chr11:61876456-61876865	410	chr11:61876866-61876963=61876359-61876455:-	IR-S	16.54	96.11	23.58	96.1	17.73	95.48	16.9	97.09	28.09	97.4	21.43	95.08	17.04	96.48	33.9	62.16	98.05	47.69	96.13	38.24	95.22	20.83	93.68	22.73	89.56	34.15	94.2	23.53	96.86	46.15	96.5	50	90.28	47.37	94.87	35.48	91.85	51.9	92.86	64.71	83.05	55.56	96.51	61.19
FAHD2A	HsaINT0059390	chr2:95402873-95405552	2680	chr2:95402700-95402872=95405553-95405803:+	IR-S	17.52	23.34	10.78	50.96	16.72	39.88	21.8	52.61	9.3	34.85	22.57	52.92	12.3	42.21	20.44	40.23	45.64	40.85	52.68	29.49	58.82	36.76	39.66	32.11	35.05	34.43	33.89	24.47	47.21	41.8	49.53	19.96	23.34	31.09	21.58	23.92	39	31.7	23.73	18.25	28.52	21.01	32.32	25.08
FAM118A	HsaINT0059628	chr22:45332711-45335349	2639	chr22:45332425-45332710=45335350-45335382:+	IR-S	8.11	72.08	15.35	78.33	18.2	49.9	17.71	52.84	11.55	27.39	23.72	49.12	9.68	90.57	14.23	21.84	63.75	35.03	63.13	22.88	54.61	33.65	58.49	9.22	23.91	11.9	31.81	28.36	53.15	24.41	51.16	14.29	42.74	11.02	7.62	21.66	62.88	3.96	59.89	7.83	26.75	6.9	15.53	5.86
FAM120B	HsaINT0059672	chr6:170391122-170395486	4365	chr6:170391013-170391121=170395487-170395579:+	IR-C	0	46.15	8.33	42.86	4.76	46.15	14.89	57.89	11.76	46.67	8.57	44.44	15.79	86.21	15	44.3	91.3	37.5	76.19	27.54	74.84	48.57	72.84	30.43	77.42	37.08	70.73	50	82.61	52.11	73.55	11.11	52.94	10.48	34.48	12.96	29.23	17.36	43.75	7.22	35.77	6.06	35.04	8.06
FAM131A	HsaINT0059805	chr3:184337719-184338386	668	chr3:184337488-184337718=184338387-184338529:+	IR-C	25	75	66.67	66.67	53.85	100	100	85.19	41.18	44.44	33.33	100	100	84.62	82.61	75	64.29	76.47	92.31	46.34	80.7	71.43	84.62	61.9	69.23	84.62	66.1	47.06	69.23	70.59	58.97	64.52	72	41.67	69.57	73.33	74.47	65.08	77.36	55.56	88.57	59.26	87.23	67.35
FAM131A	HsaINT0059806	chr3:184338530-184341723	3194	chr3:184338387-184338529=184341724-184341817:+	IR-C	16.67	82.86	33.33	93.1	33.33	84.62	30.77	94.29	33.33	92.31	84.62	79.31	26.32	100	20	62.5	75	65.96	71.01	34.69	77.08	50	80.65	31.82	64.29	46.43	67.21	35	87.23	53.33	78.18	25.17	59.02	29.19	66.67	26.56	53.09	32.08	51.81	21.31	59.26	36.59	54.02	24.41
FAM134C	HsaINT0059867	chr17:42586892-42592055	5164	chr17:42592056-42592162=42586765-42586891:-	IR-C	54.84	100	59.3	82.93	72.76	100	32.69	80.5	42.15	100	42.15	66.02	49.28	100	49.28	54.84	51.66	85.36	82.19	100	93.15	87.18	70.83	74.45	74.45	75.95	100	75.95	81.38	45.43	88.6	59.3	100	100	79.53	85.36	78.46	59.3	59.3	68.61	85.36	49.28	80.19	57.19
FAM149B1	HsaINT0060002	chr10:73235319-73239311	3993	chr10:73235193-73235318=73239312-73239384:+	IR-C	44.44	78.95	38.1	69.23	30	64.29	81.82	68	52.94	77.78	22.58	40	40	78.95	35.48	50	44.83	52.94	33.33	51.22	55.56	25.81	25	28.95	50	31.91	46.15	41.38	46.34	34.29	56.1	24.14	39.39	12.2	18.18	38.98	27.66	3.85	28.3	15	31.03	14.29	22.03	28.81
FAM149B1	HsaINT0060010	chr10:73228185-73230421	2237	chr10:73228060-73228184=73230422-73230525:+	IR-S	13.51	62.5	12.99	67.68	16.12	69.31	7.13	71.08	14.08	68	4.35	83.1	21.45	100	26.53	41.85	39.06	16.25	43.86	23.15	69.48	19.79	68.9	13.09	34.99	6.98	21.86	32.05	40.11	18.41	57.84	21.61	30.64	14.89	42.86	9.52	17.82	26.03	38.06	16.1	38.06	16.85	82.29	8.64
FAM160A2	HsaINT0060128	chr11:6214912-6217370	2459	chr11:6217371-6218150=6214733-6214911:-	IR-C	28.95	87.8	38.98	86.99	34.33	85.71	34.94	88.81	20	84.85	35.48	90.24	30.91	87.23	42.11	30.43	72.46	50	81.6	52.81	82.43	43.48	84.95	57.33	86.67	44.83	75.46	53.57	70.26	41.88	77.44	32.77	50.4	24.44	63.22	31.25	47.25	41.94	72.82	33.33	60.98	25.93	55.07	25.77
FAM160B2	HsaINT0060150	chr8:22100973-22101439	467	chr8:22100844-22100972=22101440-22101530:+	IR-C	0	84.51	14.29	77.14	15.79	82.76	40	86.39	18.18	78.91	13.33	84	27.27	77.58	40.74	27.87	91.87	16.67	90.55	36.84	78.16	14.29	72.04	15.15	65.37	40.98	64.75	44.44	78.91	33.33	85.49	4.95	56.82	12.28	42.16	11.86	58.01	16.83	46.02	9.59	43.13	4.17	47.23	12.5
FAM160B2	HsaINT0060156	chr8:22096510-22097515	1006	chr8:22096337-22096509=22097516-22097620:+	IR-C	11.11	69.89	0	57.45	4	79.13	0	74.12	5.26	71.91	23.08	65.43	19.05	68.29	18.18	4.35	77.95	18.18	74.06	13.43	74.75	19.23	77.71	25.81	76.54	16.92	68.69	20	74.32	21.43	74.19	27.47	79	33.33	77.66	16.48	82.7	18.81	83.58	31.58	77.99	20	86.76	22.45
FAM173A	HsaINT0060284	chr16:721437-721597	161	chr16:721158-721436=721598-721702:+	IR-S	28.57	88.89	27.27	84.62	18.18	76.92	35	90	60	100	50	90	33.33	86.96	16.67	54.84	89.93	42.86	90.04	46.55	88.03	28.47	91.23	33.33	91	77.78	87.3	53.85	100	37.5	90.91	48.21	71.51	73.08	83.27	50.97	73.85	43.02	60.28	53.85	72.82	62.5	77.69	55.56
FAM173A	HsaINT0060286	chr16:721942-722083	142	chr16:721801-721941=722084-722134:+	IR-S	8.59	51.51	20.61	67.82	6.7	46.54	12.02	47.54	32.75	60.4	10.83	58.78	17.13	59.11	16.56	39.21	69.14	38.8	77.51	17.3	44.12	23.22	56.96	41.18	64.8	35.58	60.34	25.96	50.48	29.65	68.15	31.9	49.26	50.67	66.95	26.52	45.05	30.08	44.46	42.96	63.89	34.33	58.51	35.35
FAM173A	HsaINT0060287	chr16:722135-722308	174	chr16:722084-722134=722309-722590:+	IR-S	4.44	59.2	9.86	53.94	3.45	56.34	6.25	65.62	8.33	87.8	10	66.42	9.76	69.49	8.51	22.76	71.88	34.21	82.58	16	53.74	16.67	63.25	32.74	71.96	36.08	65.11	17.39	68.4	21.37	75.81	28.09	58.78	51.72	63.85	23.24	49.53	23.14	49.22	40.91	67.54	29.63	62.88	32.26
FAM173B	HsaINT0060290	chr5:10235262-10236477	1216	chr5:10236478-10236615=10235211-10235261:-	IR-S	4	100	5.26	66.67	15.15	60	7.69	33.33	7.32	66.67	9.09	77.78	22.22	0	18.18	43.75	33.33	60	63.64	8.57	57.14	33.33	100	55.56	50	31.03	60	25.71	66.67	72.73	44	21.43	17.65	33.33	60	14.29	66.67	20	28.57	14.29	0	5.26	25	18.18
FAM173B	HsaINT0060291	chr5:10227648-10235210	7563	chr5:10235211-10235261=10226326-10227647:-	IR-S	9.09	45.45	0	53.85	15.79	66.67	15.15	80.95	23.81	100	14.29	66.67	12	33.33	3.45	29.03	57.14	38.46	66.67	23.53	54.55	28.57	57.14	75	37.5	25	33.33	23.81	72.73	57.89	61.54	12.5	64.71	14.29	33.33	44	53.85	22.58	54.55	30.77	37.14	12.82	44	26.32
FAM184A	HsaINT0060425	chr6:118961964-118964666	2703	chr6:118964667-118964771=118961761-118961963:-	IR-S	9.09	26.67	5.26	26.32	28.57	21.21	6.67	24.32	14.29	25.93	12.5	36	11.11	18.52	15.79	14.29	27.27	20	14.29	23.81	18.18	13.04	75	27.27	55.56	68.42	75	26.32	33.33	10	23.81	25.93	38.46	14.29	45.45	25.71	24.14	13.33	22.22	30	36.84	11.11	26.32	11.11
FAM188A	HsaINT0060481	chr10:15782227-15786560	4334	chr10:15786561-15786648=15782155-15782226:-	IR-S	4	20	6.67	50	12.2	16.67	10	50	0	61.9	16.67	50	6.67	33.33	13.33	27.27	15.38	21.21	66.67	7.14	37.5	6.67	20	9.09	29.41	10.34	45.45	8.7	47.83	10.34	39.39	6.06	10.64	5.08	17.65	10.34	8.11	3.12	28.57	4.55	6.67	1.59	21.05	7.69
FAM188A	HsaINT0060485	chr10:15838280-15841425	3146	chr10:15841426-15841599=15838228-15838279:-	IR-S	0	33.33	4.76	75	8.11	21.74	4.35	6.67	4	45.45	8.11	45.45	0	42.86	4.35	21.74	56.52	25.58	42.86	26.32	35.71	8.47	41.18	13.33	36.84	21.43	45.45	20.83	77.78	4.76	52.94	1.82	4	0	8.33	2.13	2.22	3.92	11.11	0	0	0	2.33	0.9
FAM188A	HsaINT0060486	chr10:15837319-15838227	909	chr10:15838228-15838279=15837204-15837318:-	IR-S	4	60	3.7	100	6.25	80	0	84.62	0	75	0	38.46	3.23	42.86	6.38	36.36	85.71	12.5	77.78	25	33.33	8.33	14.29	12.5	66.67	2.56	50	15	69.23	18.18	55.56	2.08	0	4.76	0	5.08	1.96	1.54	4.35	1.37	7.14	0	0	2.86
FAM193B	HsaINT0060608	chr5:177525206-177532442	7237	chr5:177532443-177532641=177524185-177525205:-	IR-C	2.86	21.88	2.22	35.58	5	33.61	7.69	24.06	6.67	37.95	4.76	33.33	9.38	27.53	15.38	25.71	63.33	31.43	64.88	8.47	63.53	24.53	53.9	17.24	50.57	28.21	58.85	24.32	61.36	12	57.42	8.82	35.76	10.14	43.95	12.5	48.33	16.42	53.85	10.2	45.95	11.11	54.87	6.98
FAM195A	HsaINT0060645	chr16:642250-647416	5167	chr16:642120-642249=647417-647544:+	IR-S	5.26	29.84	13.04	52.76	18.52	50	3.8	37.22	6.25	57.01	13.73	47.37	8.7	39.42	7.58	15.15	35.48	9.68	57.89	28.57	48.89	4.76	58.9	23.4	32.39	37.5	62.5	31.25	55.56	27.27	45.76	36.36	30.23	20	55.56	36.36	66.67	16.98	38.89	13.85	53.42	18.18	64	36
FAM195B	HsaINT0060652	chr17:81822908-81823208	301	chr17:81823209-81823311=81822417-81822907:-	IR-S	66.04	86.34	69.03	77.91	86.9	90.68	68.62	83.11	68.58	86.26	63.43	82.24	69.73	82.72	66.86	63.96	71.51	67.66	76.92	83.18	89.15	72.54	78.67	71.49	75.62	64.17	74.52	63.5	69.03	63.43	64.73	86.08	83.61	88.63	86.87	92.59	93.72	88.87	85.77	84.65	88.92	86.29	86.6	81.46
FAM200B	HsaINT0060701	chr4:15681902-15686235	4334	chr4:15681729-15681901=15686236-15690447:+	IR-S	36.71	40.54	36.63	22.58	28.93	29.41	33.33	28	38.46	39.73	20.75	28.3	33.33	38.46	22.41	44	25	43.55	34.38	29.41	38.27	22.95	51.35	27.62	38.18	29.17	42.86	25	33.33	26.38	33.33	24.49	29.79	33.68	27.06	36.56	31.82	32.16	40.74	28.7	31.53	32.5	27.27	25.12
FAM3A	HsaINT0060959	chrX:154515813-154515909	97	chrX:154515910-154516242=154515760-154515812:-	IR-S	58.47	84.24	59.95	89.71	65.85	90.05	55.34	97.23	60.06	91.6	55.75	77.81	46.42	94.65	54.69	65.57	78.68	70.99	85.66	59.61	87.04	67.66	86.06	69.24	83.39	62.54	90.62	60.71	89.42	71.45	85.6	89.83	100	85.38	90.77	73.73	81.85	89.86	84.62	81.21	95.54	75.31	89.27	74.35
FAM3A	HsaINT0060963	chrX:154507862-154508288	427	chrX:154508289-154508347=154507811-154507861:-	IR-C	15.25	50	13.85	53.49	10.45	70	1.89	49.3	21.74	55.56	6.67	56.36	15.62	48.45	8.7	37.25	69.01	21.95	74.77	42.22	67.01	17.07	74.36	11.76	65.77	25.58	61.17	25	73.68	40.43	60.53	51.61	67.44	25	70.42	20	69.05	25.58	75.44	40.98	62.35	20	78.82	24.59
FAM57A	HsaINT0061186	chr17:732770-733097	328	chr17:732607-732769=733098-733181:+	IR-C	18.37	33.33	5.56	28.57	12.28	21.74	11.11	57.14	2.22	17.65	4.55	41.18	4.17	33.33	9.09	30.43	38.46	23.08	46.15	12.82	33.33	15.56	47.37	45.45	48.15	6.25	21.43	21.74	25.93	41.67	53.85	33.33	57.14	36	64.71	38.46	31.03	37.93	36.36	58.62	26.32	30.43	71.43	16.13
FAM57A	HsaINT0061188	chr17:738048-740504	2457	chr17:737846-738047=740505-740600:+	IR-S	6.98	68.42	7.69	38.1	9.09	39.53	6.25	54.84	12.5	47.37	4.62	69.23	8	68.89	8.7	14.29	53.85	15.38	46.15	12.5	38.46	22.22	53.85	10	31.43	14.81	46.43	16.67	34.48	20	28.89	15.79	60	30.43	33.33	25.71	37.5	33.33	56.52	19.05	52	12.82	37.78	18.52
FAM69B	HsaINT0061349	chr9:136712729-136717576	4848	chr9:136712572-136712728=136717577-136717711:+	IR-S	11.11	94.67	25.42	80.95	8	66.27	10.53	77.55	5.88	88.98	12	81.33	11.11	81.08	10.64	29.41	72.22	22.89	62.26	7.32	63.38	15.66	57.26	21.62	44.75	9.09	66.27	16.67	57.72	20.45	52.07	7.32	50	25.49	47.69	6.8	37.7	4.85	52.27	10.42	47.92	17.81	49.53	4.55
FAM69B	HsaINT0061350	chr9:136717712-136721920	4209	chr9:136717577-136717711=136721921-136722028:+	IR-C	12.99	83.85	18.8	79.25	8.24	74.09	9.33	85.91	12.12	79.04	8.28	85.53	17.16	85.16	17.46	32.28	66.07	25.83	74.74	18.52	69.91	21.52	79.74	21.05	68.28	14.14	65.83	17.86	72.04	26.46	65.98	23.68	61.45	17.53	53.99	18.87	52.22	20	55.22	16.54	58.27	20.18	65.36	15.1
FAM73B	HsaINT0061435	chr9:129068333-129069075	743	chr9:129068198-129068332=129069076-129069129:+	IR-C	33.33	89.72	36.36	91.86	40.74	84.83	57.14	90.36	21.43	84.4	30	85.77	69.23	82.44	92	60	84.83	42.86	80.39	35.14	84.25	30	88.41	36	72.55	34.88	83.96	75	77.14	51.72	81.02	9.43	65.96	40	64.15	39.53	68.14	43.4	77.57	20	70.54	26.92	70.83	24
FAM73B	HsaINT0061436	chr9:129069130-129069848	719	chr9:129069076-129069129=129069849-129069965:+	IR-C	7.69	38.1	8.02	40.97	2.78	37.75	13.38	42.2	16.33	36.92	3.79	44.24	15.6	34.73	11.78	27.73	59.59	17.2	64.74	22.1	58.89	13.25	44.38	5.88	39.53	22.13	51.1	12.97	57.44	31.27	71.3	8.97	34.29	7.97	31.03	12.5	41.32	8.07	31.03	10.61	33.38	5.48	46.47	16.06
FAM76B	HsaINT0061477	chr11:95788564-95789391	828	chr11:95789392-95789790=95788499-95788563:-	IR-S	21.74	92.59	9.09	73.68	5.26	59.32	31.43	80.56	21.21	65.79	17.65	65.52	10.34	90.48	38.46	61.11	54.72	53.85	87.69	21.05	62.07	4.35	43.28	16.67	40	4.92	67.65	12.82	56.52	38.89	80.39	5.66	23.81	7.94	16.67	5.26	12.5	1.3	4.35	5.08	18.52	4.11	25.71	3.85
FAM98C	HsaINT0061691	chr19:38403219-38403337	119	chr19:38403135-38403218=38403338-38403486:+	IR-S	33.33	63.64	0	81.82	33.33	29.41	27.27	77.78	0	100	66.67	100	20	80	36.84	23.81	41.18	33.33	33.33	17.24	50	66.67	54.55	29.41	67.74	38.46	50	6.67	47.83	21.43	25.93	44.44	49.02	56.52	50	33.33	32.26	63.64	58.73	42.37	31.71	37.5	68.18	51.72
FAM98C	HsaINT0061696	chr19:38405636-38406909	1274	chr19:38405519-38405635=38406910-38407077:+	IR-S	33.33	58.73	13.51	71.43	14.29	76.19	13.33	57.89	9.09	80	12	71.43	27.27	53.33	17.65	15.79	63.16	77.78	65	21.43	55.93	24.14	63.64	37.93	71.43	20	64.29	23.4	47.62	11.63	45.76	39.29	36.84	54.55	51.52	50	65.71	49.15	70.59	35.71	52.73	43.75	55.56	42.86
FAM98C	HsaINT0061697	chr19:38407078-38408750	1673	chr19:38406910-38407077=38408751-38409088:+	IR-S	0	42.86	9.68	31.91	21.74	44.26	4.55	43.33	9.68	28.21	6.67	52.38	15.56	33.33	10	21.05	35.71	11.76	42.11	5.26	42.86	24.44	36.67	28	31.15	21.05	27.27	13.04	42.86	5.88	25.81	23.68	61.19	18.18	42.86	20	52.73	20	52.38	31.25	54.02	24.59	45.76	28.3
FAN1	HsaINT0061727	chr15:30925940-30928552	2613	chr15:30925789-30925939=30928553-30928656:+	IR-S	26.67	87.04	38.46	87.79	26.83	89.23	55.56	96.77	46.15	84.21	49.33	80.6	41.33	69.89	49.33	64.71	98.39	52.21	88.54	62	88.96	61.8	87.4	81.82	85.14	56.19	86.21	65.71	81.94	57.75	84.42	59.6	60.87	50	73.68	68.29	80	54.22	61.11	54.02	75.28	59.52	80.85	34.94
FAN1	HsaINT0061728	chr15:30928657-30929202	546	chr15:30928553-30928656=30929203-30929397:+	IR-S	8.57	35.08	11.36	46.05	4.26	30.26	17.5	50	7.69	27.82	14.73	53.23	7.89	42.37	16.85	19.64	65.31	30.86	55.43	25	40.44	22.45	41.18	23.36	29	25	43.01	22.83	48.28	25.53	50.28	20.97	47.75	24.21	44.09	27.12	35.62	29.79	34.94	24.75	36	25	43.93	20.39
FAN1	HsaINT0061735	chr15:30925292-30925788	497	chr15:30925127-30925291=30925789-30925939:+	IR-S	9.09	45.76	8.33	61.9	14	59.35	23.29	64.95	18.52	57.41	24.73	57.8	17.81	40	15.94	26.44	65.31	47.13	61.15	28.95	60	34.94	71.05	34.94	62.83	38.14	41.94	36.99	52.94	27.27	56.8	25.23	31.82	24.68	43.75	45.26	62.5	34.65	52.38	25.64	45.65	45.45	67.74	38.1
FANCA	HsaINT0061752	chr16:89770260-89770563	304	chr16:89770564-89770634=89770166-89770259:-	IR-S	20	47.06	27.27	68.58	4.76	54.31	26.32	76.47	29.58	78.85	35.85	81.95	12.5	43.75	23.08	57.14	82.27	37.04	69.72	27.87	71.31	37.25	69.7	22.58	62.99	42.42	72.52	42.86	78.99	45.95	79.12	55.56	72.73	40	52	66.67	85.71	28.57	65.71	14.29	65.96	16.67	78.95	15.79
FANCA	HsaINT0061767	chr16:89739554-89739993	440	chr16:89739994-89740099=89739478-89739553:-	IR-C	5.56	25.38	10.45	22.46	8.82	24.5	4.55	26.11	2.86	19.15	1.49	21.13	1.69	25.52	7.14	6.9	37.36	11.43	34.96	13.73	42.51	13.25	35.52	12.09	32.28	7.07	29.52	8.47	36.14	16.42	25.74	57.89	64.8	37.93	77.05	50	71.08	27.27	78.57	36	61.4	38.89	57.23	52.38
FANCA	HsaINT0061771	chr16:89738709-89738881	173	chr16:89738882-89738974=89737551-89738708:-	IR-C	17.07	9.3	5.26	6.53	9.09	16.07	6.02	5.75	10.42	9.26	6.45	7.07	4.35	9.41	5.41	9.09	16.9	10	21.59	22.89	24.32	25.53	25.53	16.83	19.59	12.9	19.85	9.68	24.77	7.89	18.12	46.67	61.33	77.78	52.94	41.67	75.47	36.59	63.49	42.11	53.75	75	54.84	62.96
FANCG	HsaINT0061858	chr9:35077400-35078140	741	chr9:35078141-35078343=35077264-35077399:-	IR-S	6.67	76.64	7.09	78.25	6.82	71.77	11.28	80.83	7.25	86.08	12.96	84.48	11.11	78.95	16.98	25.98	79.94	14.47	77.55	17.37	76.38	18.11	72.73	19.74	72.3	21.68	72.39	17.28	75.16	23.97	74.06	11.11	74.6	15.38	55.81	33.33	50	12.5	68.97	18.92	63.38	17.86	53.09	23.53
FANCL	HsaINT0061902	chr2:58162948-58163028	81	chr2:58163029-58163074=58162866-58162947:-	IR-S	1.45	44.52	7.04	54.36	3.85	62.39	4.95	71.28	12.68	57.4	10.59	60	12.24	49.47	8.33	18.33	67.9	25	47.95	25	53.19	18.18	40	25.64	60	24.07	53.33	28.36	71.96	22.11	74.47	26.32	57.14	9.09	50	16.67	38.46	50	60	9.09	53.85	29.41	47.06	6.67
FAR1	HsaINT0061975	chr11:13710871-13711763	893	chr11:13710693-13710870=13711764-13711808:+	IR-S	4.88	25	5.88	12.28	2.52	21.43	2.99	19.3	0.78	24.44	7.91	25	2.91	30.43	4.05	23.2	29.17	37.86	18.75	18.18	37.25	25.93	36.84	20.45	33.33	16.67	30.43	22.22	21.21	18.52	44.12	12.5	20	20.55	42.86	19.48	9.09	10	20	12.73	23.08	5.88	26.32	12.62
FAR1	HsaINT0061979	chr11:13714681-13721729	7049	chr11:13714509-13714680=13721730-13721859:+	IR-S	9.09	64.29	8.11	41.67	7.44	63.64	22.89	85.59	8.47	57.14	21.57	61.7	16.13	52.94	16.92	50.98	70.21	56.52	81.82	49.25	73.63	68.42	69.23	38.67	70.59	52.24	84.62	58	71.93	30.61	57.14	30.16	52.54	46.94	44	41.54	29.03	34.78	67.57	23.53	41.67	36.67	66.67	23.53
FAR2	HsaINT0061988	chr12:29311147-29311882	736	chr12:29311028-29311146=29311883-29311950:+	IR-S	1.38	45.45	3.41	30.26	9.17	55.25	5.56	31.25	2.41	37.87	7.23	34.54	1.63	70.34	10.84	22.76	78.71	27.47	80.92	18.52	93.11	15.02	34.65	11.71	51.47	18.52	78.78	22.44	61.4	12.23	29.2	3.14	29.79	23.78	24.14	65.45	76.09	5.04	38.22	23.63	39.86	28.85	63.37	15.02
FARP2	HsaINT0062022	chr2:241441557-241456746	15190	chr2:241441304-241441556=241456747-241456922:+	IR-S	25	25	44.19	75	47.83	33.33	44	77.78	75	38.46	41.18	42.86	33.33	20	65.22	66.67	50	50	21.43	66.67	39.62	53.85	60	46.15	60	84.62	45.45	56.25	68.42	72.41	84.62	46.67	14.29	30	13.04	29.41	11.11	25.49	14.29	14.89	21.43	25.81	33.33	25.71
FARS2	HsaINT0062044	chr6:5261661-5368549	106889	chr6:5261351-5261660=5368550-5369182:+	IR-S	9.38	17.65	9.68	6.67	12.68	21.74	5.66	20	7.04	0	8.11	11.11	6.9	14.29	5.26	24.59	33.33	17.39	44.44	20	40	15	17.65	19.51	40.74	38.46	31.25	19.05	52.94	14.67	22.22	11.11	33.33	38.46	19.3	17.33	11.76	23.29	29.03	30.91	63.64	25.84	17.95	18.18
FARSB	HsaINT0062063	chr2:222624776-222628836	4061	chr2:222628837-222628888=222624714-222624775:-	IR-S	0	48.94	3.7	33.33	2.78	55.1	2.6	41.38	0	45.83	4.41	54.84	6.38	43.75	2.61	32.53	59.26	27.27	90.91	24.24	65.59	27.27	58.82	9.68	65	3.92	54.29	21.43	51.02	36.71	72.41	6.67	24.14	7.32	7.69	15	18.75	2.86	5.88	5.88	7.69	5.56	12.2	2.22
FASTK	HsaINT0062137	chr7:151079022-151080684	1663	chr7:151080685-151080864=151078842-151079021:-	IR-C	37.87	100	25.53	98.34	21.52	96.76	85.6	100	40.68	98.16	69.57	97.92	39.51	99.02	37.87	54.94	100	53.33	92.87	63.47	95.99	57.83	97.17	76.19	94.27	40.68	95.99	85.6	93.16	18.6	97.2	34.13	82.05	34.78	88.72	52.95	86.14	52.95	90.41	44.94	79.96	36.78	86.76	40.14
FASTK	HsaINT0062142	chr7:151077237-151077309	73	chr7:151077310-151077401=151077101-151077236:-	IR-S	6.5	47.2	4.27	51.82	7.74	48.76	4.91	47.21	9.8	58.89	6.02	52.99	7.59	54.07	6.38	13.7	54.27	15.42	49.63	15.43	54.34	24.56	61.94	26.63	53.22	18.92	50.06	18.52	47.16	15.58	54.82	21.52	62.47	25.53	60.11	18.32	57.11	24.29	61.18	26.58	60.9	18.49	63.17	19.35
FASTK	HsaINT0062143	chr7:151077028-151077100	73	chr7:151077101-151077236=151076913-151077027:-	IR-S	7.04	56.76	4.96	57.62	6.01	58.08	3.39	47.1	10.08	57.22	9.86	53.1	8.42	54.47	8.77	18.31	47.47	15.09	43.69	22.7	56.08	29.51	63.43	27.27	59.08	23.89	57.7	29.87	55.19	8.2	44.7	27.47	56.46	25.93	60.31	15.28	58.61	21.36	65.09	31.18	60.68	28.57	68.7	22.16
FASTKD1	HsaINT0062154	chr2:169557298-169560386	3089	chr2:169560387-169560785=169557187-169557297:-	IR-C	12.2	62.71	17.65	46.03	7.32	53.33	17.46	83.61	15.15	52.38	6.9	60	12.33	68	23.36	40	58.62	10.34	100	14.29	64.71	10	33.33	9.09	28.57	13.04	47.37	26.32	47.83	38.46	64.71	4.76	20	13.04	25	15.38	0	4.76	60	0	25	0	30.77	4.35
FBF1	HsaINT0062282	chr17:75920108-75920273	166	chr17:75920274-75920429=75920007-75920107:-	IR-S	20	56.41	33.33	59.49	33.33	74.42	33.33	76.92	25	67.57	25	66.67	50	56.96	23.08	6.67	29.41	5.88	38.46	5.26	69.37	25	59.18	0	71.01	50	59.18	0	67.86	10	38.89	60	87.5	0	69.23	100	73.33	0	80	50	88.89	100	77.78	0
FBF1	HsaINT0062290	chr17:75914299-75914746	448	chr17:75914747-75914932=75914122-75914298:-	IR-S	49.3	56.7	44.9	70.64	20	77.56	16.67	83.88	0	81.2	4.35	67.86	3.7	66.2	9.09	8.57	66.49	6.67	38.6	2.86	70.32	0	71.2	0	52.97	4.76	50.92	0	58.51	9.09	44.74	0	31.25	10.34	33.97	7.69	38.46	12.5	21.43	20	36.36	12.5	40.66	0
FBN3	HsaINT0062514	chr19:8126018-8126296	279	chr19:8126297-8126347=8125892-8126017:-	IR-S	7.69	67.01	0	48.04	7.69	46.15	8.7	49.46	10.53	62.23	3.7	47.14	21.43	47.3	16.98	14.29	56.52	15.38	57.41	8.33	46.1	100	54.55	12	59.06	13.04	46.39	0	57.89	21.74	68.42	71.43	46.94	30	43.28	45.45	50.82	17.07	36.47	25	57.33	4.35	23.19	20
FBN3	HsaINT0062525	chr19:8111771-8111976	206	chr19:8111977-8112099=8111648-8111770:-	IR-S	18.37	49.4	9.59	58.02	11.48	47.06	16.36	46.62	1.89	41.39	27.71	84.71	13.51	53.57	14.29	4	38.98	12.28	60.87	18.75	62.92	20	50.94	11.11	63.96	47.83	79.89	11.63	57.69	8.33	47.75	6.67	33.33	6.67	51.81	15.15	42.86	4.92	38.97	18.18	27.27	37.5	68.81	21.43
FBRSL1	HsaINT0062601	chr12:132570541-132571306	766	chr12:132570335-132570540=132571307-132571524:+	IR-S	76.92	94.96	80	91.6	80.95	93.06	57.14	98.73	57.89	95.6	100	98.39	80	92.45	50	52	86.41	33.33	79.78	40.62	78.72	30.83	62.82	32.65	70.32	51.85	84.04	87.1	84.87	56.25	80.72	20.57	49.32	32.79	51.7	29.41	59.57	23.81	48.37	18.92	56.49	31.47	54.65	26.76
FBXL15	HsaINT0062626	chr10:102421183-102421353	171	chr10:102419814-102421182=102421354-102421507:+	IR-S	17.46	37.25	11.11	36.26	22.22	47.47	27.03	32.33	21.43	28.3	20.93	40.48	7.69	31.76	29.03	37.33	59.18	40.43	63.03	40.2	46.1	30.23	36.25	39.33	60.95	45.65	52.49	41.51	52.8	57.14	55.79	47.74	56.76	53.68	58.72	60.82	61.81	49.8	56.16	68.67	62.67	51.96	59.83	50.59
FBXL15	HsaINT0062627	chr10:102421508-102421786	279	chr10:102421354-102421507=102421787-102422292:+	IR-S	71.42	94.39	62.37	90.83	58.94	88.85	59.18	91.93	44.77	82.12	75	100	76.26	90.73	40.6	27.35	71.96	36.07	75.4	32.02	80.28	37.41	91.32	39.78	85.27	100	90.29	39.66	85.89	15.29	59.79	42.33	72.54	46.11	81.6	50.37	68.97	55.75	81.05	51.47	78.35	56.56	85.39	51.19
FBXL17	HsaINT0062634	chr5:108367954-108380698	12745	chr5:108380699-108382098=108367831-108367953:-	IR-S	20	100	33.33	90.91	33.33	77.78	53.85	84.62	20	71.43	33.33	90	55.56	100	28.57	30.23	92.59	19.35	73.91	53.33	70.37	25	53.85	19.3	50	28.57	54.84	37.25	52.38	13.64	75	12	16	24.14	45.45	20	39.62	15.6	25.71	18.52	37.5	31.15	31.58	18.92
FBXL2	HsaINT0062659	chr3:33378742-33383988	5247	chr3:33378685-33378741=33383989-33384201:+	IR-S	66.67	50	20	17.65	0	50	31.03	47.83	0	21.74	11.11	17.65	17.65	41.67	16.67	33.33	50	71.43	58.62	33.33	43.59	33.33	52.38	20	36.36	60	42.86	40.74	37.93	44	60	7.25	20	9.09	31.82	14.29	42.31	15.38	31.03	9.68	20.69	8.2	25.81	10
FBXL6	HsaINT0062713	chr8:144357787-144358031	245	chr8:144358032-144358472=144357628-144357786:-	IR-C	35.14	94.72	44.19	91.04	30.77	92.68	21.95	95.45	19.23	92.98	33.33	100	36.84	95.47	55	42.86	87.6	31.25	92.96	42.31	89.05	41.27	90.7	46.15	84.87	45.45	93.24	45.45	86.36	50	79.78	74	88.66	63.64	84.97	68.22	87.38	71.65	89.84	60	86.86	72	84.31	75
FBXL6	HsaINT0062714	chr8:144357122-144357438	317	chr8:144357439-144357502=144356990-144357121:-	IR-C	44.1	96.24	36.56	95.99	26.96	98.5	25.25	95.12	34.55	97.06	26.53	97.82	59.72	96.03	43.1	64.14	89.23	40.53	93.75	54.68	93.5	52	98.05	55.35	91.24	50.55	92.99	58.04	93.78	49.61	88.06	70.4	89.96	95.32	92.55	76.36	90.49	68.79	88.35	71.74	90.07	74	95.32	72.52
FBXL6	HsaINT0062715	chr8:144356916-144356989	74	chr8:144356990-144357121=144356808-144356915:-	IR-S	19.3	51.85	7.96	38.49	8.94	52.65	15.94	45.66	12.5	48.21	10.81	53.98	8.7	56.74	10.77	10	43.8	10.71	33.33	16.33	50.21	20.99	57.79	5.66	52.42	18.52	55.93	35.71	49.6	11.11	43.88	27.27	58.23	29.03	40.82	31.11	51.4	53.12	53.52	26.03	54.58	29.27	50.24	25.3
FBXO10	HsaINT0062726	chr9:37512722-37515903	3182	chr9:37515904-37516085=37510892-37512721:-	IR-S	2.44	33.33	16.13	56.52	13.21	27.27	13.79	43.48	9.43	52.94	12	82.61	9.09	70	11.11	28.57	50.56	35.9	63.27	17.86	36.05	27.27	51.52	13.25	40.48	28	46.43	15.38	50.72	29.63	63.33	22.22	36	25	37.5	21.21	31.25	24.64	32.39	14.67	43.18	20.55	31.76	20.93
FBXO10	HsaINT0062734	chr9:37516086-37518124	2039	chr9:37518125-37518438=37515904-37516085:-	IR-S	7.32	39.39	15.15	60	1.59	54.84	3.7	53.85	13.51	68.42	3.45	74.19	2.94	60	3.85	40.85	40.35	21.95	48.39	24.44	46.03	27.71	76	18.64	39.47	27.78	35.8	21.95	44.44	12.68	50.88	22	29.03	22.22	31.43	32.35	35.85	29.87	50	4.65	26.19	20.59	25.93	25.58
FBXO17	HsaINT0062777	chr19:38946568-38948566	1999	chr19:38948567-38948678=38946472-38946567:-	IR-C	11.96	45.74	9.57	48.57	12.04	56.39	16.54	57.52	9.09	46.77	8	56.13	21.21	50.59	15.44	20	44.08	16.6	42	20	51.05	18.56	62.5	15.34	33.89	13.08	45.56	20.51	50.21	18.89	42.11	8.7	25	14.29	26.32	19.44	23.6	10	31.82	7.32	29.73	12.2	26.09	15.89
FBXO36	HsaINT0062888	chr2:229922610-229976240	53631	chr2:229922491-229922609=229976241-229976349:+	IR-S	15.42	59.32	0	30.43	0	0	23.81	0	0	46.67	0	0	0	65.22	0	54.4	32.71	36.33	46.67	13.51	17.95	0	68.63	0	62.13	0	0	0	35.35	0	35.35	30.43	59.32	46.67	0	0	30.43	0	0	0	0	40.23	42.17	28.46
FBXO41	HsaINT0062924	chr2:73265967-73266456	490	chr2:73266457-73266682=73265893-73265966:-	IR-S	41.67	93.75	50	90.2	33.33	96.55	100	95.35	52.38	96.88	28.57	100	66.67	100	52.94	100	88.89	55.56	87.5	81.82	81.82	41.67	83.33	46.67	72.22	100	74.36	36.84	87.5	50	92.59	6.9	55.56	9.38	38.46	8.77	41.18	6.9	8.47	5.26	23.08	12.28	38.78	30
FBXO44	HsaINT0062948	chr1:11658394-11658532	139	chr1:11658267-11658393=11658533-11658628:+	IR-C	34.36	84.26	49.01	89.47	57.92	85.45	39.78	85.85	43.45	85.39	31.59	85.17	55.63	85.31	45.11	30.26	83.49	41.27	88.35	60.07	86.89	80.07	83.04	53.97	86.6	72.64	89.06	39.43	95.03	75.46	82.43	45.6	75.7	43.09	82.21	43.85	83.55	43.69	83.49	30.26	93.06	26.4	78.25	36.43
FBXO9	HsaINT0062991	chr6:53093979-53095512	1534	chr6:53093885-53093978=53095513-53095664:+	IR-S	4.11	39.01	3.33	35.85	3.03	46.09	24.32	81.25	15.79	27.42	7.46	64.44	10.68	48.72	20	58.97	61.9	42.11	63.64	13.21	57.33	11.11	24.32	17.14	21.88	18.75	25	14.29	58.62	58.82	69.7	3.03	11.76	3.61	8.33	3.57	9.52	1.45	4.62	2.56	12.15	2.22	6.85	3.45
FBXO9	HsaINT0063000	chr6:53092825-53093465	641	chr6:53092734-53092824=53093466-53093561:+	IR-S	7.27	78.38	6.09	75.44	8.8	65.81	19.54	81.94	13.6	81.68	10	84	22	87.01	25.62	52.94	74.19	32.14	75.76	19.35	67.21	35.35	88.41	32.63	59.52	26.32	76.92	32.65	80.72	42.86	77.27	15.69	66.4	27.14	55	7.69	45.24	12.38	63.64	21.89	59.44	30.97	52.94	20
FBXW5	HsaINT0063059	chr9:136941685-136942045	361	chr9:136942046-136942466=136941537-136941684:-	IR-S	7.14	76.37	9.73	76.83	8.15	83.85	5.56	85.09	9.09	81.08	9.09	87.07	6.29	83.98	8.97	11.36	69.1	11.34	74.59	19.23	81.62	16.98	79.45	32.63	77.6	9.68	79.67	30.12	80.26	16.67	77.91	14.44	65.9	13.18	63.76	14.45	60.36	13.54	64.79	13.18	67.51	14.1	69.94	13.33
FBXW7	HsaINT0063072	chr4:152324395-152326005	1611	chr4:152326006-152326231=152324184-152324394:-	IR-S	16	70.83	16.36	48.57	5	72.41	3.23	57.75	9.09	37.04	8.57	42.11	5.26	42.11	15.79	15.69	77.78	28.77	43.4	16.67	47.66	14.94	60	14.89	39.39	13.92	44	32.08	64.38	29.82	40	12.5	25.71	11.11	26.09	9.33	19.23	16.48	33.33	6.17	25.42	7.69	26.83	12.33
FCGRT	HsaINT0063210	chr19:49514134-49514210	77	chr19:49513882-49514133=49514211-49514486:+	IR-C	21.62	45.56	14.71	41.94	25	40.8	21.74	36.91	30.56	37.04	14.61	32.24	22.08	41.18	22.69	15.62	21.74	23.46	23.94	20.99	28	29.03	45	31.71	38.1	22.58	35.71	31.15	33.33	11.11	18.52	33.33	14.29	14.29	33.33	40	29.41	55.56	14.29	33.33	42.86	14.29	9.09	39.13
FCGRT	HsaINT0063212	chr19:49524777-49525456	680	chr19:49524507-49524776=49525457-49525573:+	IR-C	100	100	95.42	100	100	100	98.51	100	100	100	100	100	100	100	100	100	100	100	100	100	100	100	100	100	100	97.14	100	100	100	100	100	100	100	100	100	100	100	100	100	100	100	76.47	100	87.5
FCHO1	HsaINT0063227	chr19:17776687-17778136	1450	chr19:17776635-17776686=17778137-17778228:+	IR-S	0	60	0	71.43	5.88	52.38	0	75.44	14.29	56.25	0	58.97	0	83.33	18.75	9.09	58.97	15.79	36	13.04	56.92	7.14	47.5	33.33	83.33	25	68.89	11.11	52.94	9.09	53.85	18.52	52.94	30.12	57.32	21.57	47.83	17.31	40	14.29	49.41	5.26	55.31	11.86
FCHO1	HsaINT0063228	chr19:17778229-17778608	380	chr19:17778137-17778228=17778609-17778884:+	IR-S	76.74	61.76	60	45.83	57.58	53.66	60	33.33	65.22	36.59	68.29	45.16	55.93	40.98	62.5	23.08	42.86	42.86	42.31	30.23	41.46	36.17	33.33	31.03	35.59	24.14	30	16.67	48.72	17.86	34.25	4.76	27.27	7.69	22.41	19.19	31.3	7.89	22.72	10.53	34.48	10	29.52	3.8
FCHSD1	HsaINT0063273	chr5:141646192-141646602	411	chr5:141646603-141646722=141646087-141646191:-	IR-S	3.03	37.5	2.7	39.55	4	35.5	9.09	39.1	5	43.03	12.68	45.18	7.69	41.44	17.65	28.57	75.76	14.29	77.78	26.32	62.86	29.41	54.9	14.29	67.27	28.21	73.51	36.84	65.02	50	78.34	7.69	37.08	33.33	51.22	18.75	58.24	20	41.18	16.67	46.67	7.69	33.33	21.74
FCHSD1	HsaINT0063280	chr5:141641758-141643000	1243	chr5:141643001-141643088=141641702-141641757:-	IR-S	0	78.15	45.45	90.73	15.79	81.47	16.67	90.75	5.26	80.88	33.33	90.79	25	70.87	15.15	55.56	75	41.18	69.01	4.76	65.85	22.22	59.24	11.11	42	0	59.54	16.67	75.9	53.85	76.16	6.67	50.72	100	46.67	16.67	61.64	14.29	50.82	33.33	66.67	33.33	69.23	12
FCHSD1	HsaINT0063288	chr5:141647521-141647967	447	chr5:141647968-141648096=141647398-141647520:-	IR-S	17.24	50	0	42.16	0	37.65	20	36.59	13.33	44.36	2.44	45.2	9.09	34.16	4.55	12	41.57	6.67	51.15	33.33	39.1	14.29	48.57	0	51.9	8.33	50.34	4	53.09	12.5	39.18	30.77	36.84	14.29	42.11	27.27	48.48	16.67	55.93	25	61.54	20	51.02	28.57
FDXR	HsaINT0063448	chr17:74872134-74872865	732	chr17:74872866-74873031=74872036-74872133:-	IR-S	11.11	40.06	3.85	44.74	4.72	46.68	1.79	62.03	4.76	22.9	13.51	39.64	5.06	45.5	6.12	4.35	43.32	2.33	29.69	7.44	38.78	12.9	53.5	8.77	35.4	1.41	40.32	2.68	28.89	2.06	35.01	33.33	59.38	20	76.94	0	46.3	36.84	48.31	28	38.17	51.4	50.1	17.65
FGFR1OP	HsaINT0063933	chr6:167010894-167013507	2614	chr6:167010813-167010893=167013508-167013567:+	IR-C	11.11	58.62	14.29	30.91	11.54	28.57	27.27	37.31	18.37	66.67	16.67	59.09	18.18	75	28.3	61.9	68	36.17	36	26.83	34.94	46.15	44	37.25	45.45	26.83	39.53	36	50	45.1	42.86	22.22	100	20	25	33.33	66.67	13.33	50	17.65	52.94	33.33	29.41	15.79
FGFR1OP	HsaINT0063934	chr6:167013568-167022408	8841	chr6:167013508-167013567=167022409-167022635:+	IR-C	52.94	92.31	32	91.78	31.03	95.51	39.53	89.47	30.77	71.05	40.98	85.54	44.26	83.78	50.65	76.81	93.22	83.33	94.59	62.86	89.55	65.96	94.29	72.88	84.38	60.47	78.79	56.32	87.01	70.59	86.84	81.82	89.47	76	100	47.37	60	30.77	84.62	73.33	66.67	42.86	64.29	57.89
FGFR4	HsaINT0063992	chr5:177089694-177090389	696	chr5:177089550-177089693=177090390-177090653:+	IR-S	2.86	62.41	5.3	45.71	6.6	52.89	4.21	56.42	5.67	59.31	3.05	74.38	5.26	71.83	3	0	23.08	1.27	52.38	10.81	61.34	3.03	66.67	10.71	56.6	6.67	50.54	5.75	43.66	3.33	28.57	50	85.71	20	48.94	50	50	66.67	75.76	27.27	78.38	25	84.21	0
FIZ1	HsaINT0064280	chr19:55597902-55599473	1572	chr19:55599474-55599527=55597572-55597901:-	IR-S	26	69.7	18.52	64	16.92	46.94	23.81	65.38	21.43	62.5	15.25	80	35.48	93.1	18.42	7.14	10.2	7.55	29.11	15.62	45	16.13	50	16.98	44.58	13.73	29.41	8.16	29.41	5.08	7.37	35.17	52.73	34.44	53.09	28.57	38.82	36.17	49.43	39.88	42.31	37.06	52.31	28.77
FKBP11	HsaINT0064291	chr12:48924649-48924773	125	chr12:48924774-48924881=48924561-48924648:-	IR-C	36	82.91	25.81	78.33	9.33	81.95	46.15	78.64	44.83	83.07	47.83	80.18	42.86	79.65	34.55	80	74.19	70.59	79.56	70.59	85.41	100	100	100	96.3	72	86.05	100	84.91	91.67	82.35	100	92.59	92	89.01	85.51	90.7	89.47	98.06	87.88	91.57	100	89.36	93.55
FKBP11	HsaINT0064293	chr12:48923853-48924222	370	chr12:48924223-48924256=48923782-48923852:-	IR-S	0.84	15.76	1.64	26	5.11	21.41	4.48	17.44	5.87	25.66	2.06	18.37	1.23	12.79	3.07	51.61	36.64	29.5	42.4	21.96	31.17	18.5	25.44	8.96	24.31	12.34	22.65	18.79	35.87	41.3	40.27	13.71	25.4	24.42	21.89	23.15	27.44	23.42	29.58	11.23	23.61	23.41	22.94	30.39
FKBP11	HsaINT0064294	chr12:48922202-48923781	1580	chr12:48923782-48923852=48921959-48922201:-	IR-C	21.21	49.32	13.33	48.47	13.12	47.76	23.7	54.5	18.12	57.54	14.72	55.07	15.33	47.33	11.76	60	46.34	36.36	58.21	56.36	62.64	48.84	73.63	47.37	53.33	68.75	65.12	47.83	50	44.44	66.67	77.14	76.79	77.14	65.56	65.52	67.03	69.23	74.4	90	76.64	74.19	78.79	90.48
FKBP11	HsaINT0064296	chr12:48925112-48925299	188	chr12:48925300-48925547=48925046-48925111:-	IR-S	7.6	88.45	5.53	69.93	7.48	71.73	5.83	84.99	7.14	87.18	11.03	85.87	9.43	87.73	14.69	67.44	81.51	67.44	97.69	64.71	84.85	74.6	88.57	81.08	84.83	65.22	90.97	58.06	80.35	62.5	80	78.57	90.61	82.61	87.45	74.36	89.72	69.75	91.3	84.62	94.19	74	90.72	59.38
FKBP2	HsaINT0064336	chr11:64242214-64242383	170	chr11:64242116-64242213=64242384-64242558:+	IR-C	22.35	47.99	19.44	60.24	18.28	43.64	13.92	52.63	27.27	62.04	14.29	52.38	23.73	61.82	19.19	24	48.28	15	36.3	20.48	53.31	14.89	45.28	30.23	52.56	13.33	57.89	27.27	40.26	21.31	38	27.27	55.75	27.47	51.52	20.43	46.72	23.08	62.5	23.66	55.41	27.12	57.5	29.69
FLAD1	HsaINT0064414	chr1:154990258-154990338	81	chr1:154990159-154990257=154990339-154990528:+	IR-S	7.51	68.71	9.35	60.29	11.11	57.63	11.9	64.1	13.54	71.88	14.13	62.5	17.24	76.47	11.44	28.16	56.52	17.46	57.78	29.41	66.67	26.53	83.72	21.52	61.84	39.62	71.96	26.92	55	14.94	48.31	25.49	52.78	22.67	63.38	28.57	46.03	32.47	63.08	16.05	56.1	22.67	60	24.53
FLCN	HsaINT0064418	chr17:17216504-17217068	565	chr17:17217069-17217182=17216380-17216503:-	IR-C	2.08	52.44	7.41	57.45	8.16	55.24	1.68	54.81	1.54	52.94	5.05	56.25	4.76	53.33	3.9	33.33	70.73	13.21	60.71	29.17	70.91	27.27	69.34	22.22	53.94	13.51	45.59	19.44	62.73	12.9	62.86	17.17	45.83	15.62	53.74	19.05	40.46	19.48	59.44	14.61	51.18	28.21	58.21	6.52
FLCN	HsaINT0064419	chr17:17215317-17216379	1063	chr17:17216380-17216503=17215185-17215316:-	IR-C	4.76	61.25	8.11	54.23	5.88	68.99	3.74	63.86	5.71	53.64	4.48	72.88	6.09	58.71	7.69	33.33	73.55	14.29	68.42	18.52	69.86	15.62	65.61	15.56	70.77	25	69.39	23.08	70.51	29.63	77.5	27.54	63.48	12.68	48.65	11.11	65.31	9.86	58.1	21.05	58.06	15.79	53.97	15.94
FLNA	HsaINT0064821	chrX:154351042-154351580	539	chrX:154351581-154351696=154350909-154351041:-	IR-S	1.7	19.02	3.03	19.55	4.67	18.56	4	16.79	5.22	12.61	3.6	49.58	4.63	16.29	3.69	11.2	41.13	13.05	60.33	12.89	53.24	11.62	63.42	12.62	39.85	11.11	49.83	18.66	38.37	10.56	38.61	25	67.86	21.94	59.85	19.99	72.86	24.25	70.73	13.78	60.8	12.63	58.19	19.83
FLNA	HsaINT0064830	chrX:154365487-154366023	537	chrX:154366024-154366224=154365349-154365486:-	IR-S	0.21	2.53	0	2.09	0	2.34	0	1.02	0.23	1.23	0.21	5.38	0	2.07	0.1	0.93	11.58	2.45	17.9	6.46	22.08	9.97	45.74	2.45	12.95	3.21	19.67	3.67	9.56	0.7	8.74	69.57	96.43	46.34	88.43	93.55	100	80.77	96.09	30.56	74.59	25.52	67.1	57.45
FLVCR1	HsaINT0065037	chr1:212885397-212887890	2494	chr1:212885293-212885396=212887891-212888001:+	IR-S	9.47	34.15	3.03	35.71	7.32	47.25	18.56	64.91	14.29	47.93	8.92	46.94	17.24	35.09	14.04	50.88	62.16	42.11	92	21.95	46.67	31.82	62.5	22.81	78.95	21.74	44	30.16	77.78	50	81.13	12	40	16.28	25	15	30.43	33.33	47.37	9.68	40	10	12.5	2.13
FLVCR1	HsaINT0065038	chr1:212888002-212888488	487	chr1:212887891-212888001=212888489-212888594:+	IR-S	9.68	35.54	12.33	36.45	6.67	34.83	16.79	46.28	15.97	45	11.43	35.66	16.67	45.1	17.02	55.1	73.68	63.16	86.21	33.33	43.75	47.83	64.71	16.36	55.56	14.29	38.46	40	62.79	71.43	83.67	14.29	24.14	12.5	44.44	13.33	33.33	9.52	46.67	20	37.5	3.7	6.67	15.79
FLYWCH1	HsaINT0065054	chr16:2930011-2930412	402	chr16:2929613-2930010=2930413-2930880:+	IR-S	0	0	0	46.07	0	9.09	0	40.93	53.85	9.09	0	11.11	74.47	76	39.33	59.32	20	0	15.15	0	56.83	0	53.52	62.5	0	0	27.27	0	11.11	0	9.09	38.04	5.88	0	7.69	26.12	4.76	30.97	45.45	0	42.17	0	4	0
FLYWCH1	HsaINT0065057	chr16:2933980-2937120	3141	chr16:2933716-2933979=2937121-2937384:+	IR-C	19.35	85.96	28.21	87.65	22.81	64.71	24.32	83.58	21.21	92.31	18.18	80.95	13.33	85.19	20.83	17.14	69.01	35.19	58.78	20.99	56.25	41.25	83.95	28.09	60.68	28	42.86	38.46	63.64	29.41	60	27.27	42.33	41.22	55.66	21.6	44.55	37.79	61.09	27.91	53.61	22.95	36.71	30.4
FMNL2	HsaINT0065127	chr2:152619159-152619508	350	chr2:152618846-152619158=152619509-152619718:+	IR-C	8.72	66.67	12.5	53.37	13.04	63.87	12.41	69.09	10.09	69.57	10.06	69.11	13.39	73.08	12.58	22.27	55.67	24.14	56.52	20.86	58.16	17.77	67.18	22.47	54.98	19.34	53.03	20.74	53.17	18.27	46.15	22.91	43.31	18.66	35.24	17.7	27.56	19.83	38.58	12.5	37.43	17.79	30.11	11.83
FMNL2	HsaINT0065139	chr2:152640915-152647795	6881	chr2:152640791-152640914=152647796-152649834:+	IR-S	0	20.82	1.45	11.94	1.66	13.42	4.41	14.98	1.91	23.53	4.8	21.84	0.81	16.03	2.55	41.18	77.61	43.37	83.38	32.61	77.74	32.2	65.18	44.95	69.71	41.83	67.33	40.66	69.12	44.39	82.17	9.5	29.73	24.68	36.26	33.88	31.64	9.22	29.83	21.88	43.53	18.23	48.22	24.95
FMNL3	HsaINT0065147	chr12:49668555-49707054	38500	chr12:49707055-49707414=49668471-49668554:-	IR-S	0	30	7.69	33.33	12	20	14.29	20	9.09	36	9.68	38.46	55.56	20	20	18.52	14.29	7.69	24.14	12	7.04	9.09	14.29	0	0	0	4.35	10	6.67	18.52	21.21	0	25	0	0	25	26.32	0	0	20	0	4.76	5.88	0
FMR1	HsaINT0065235	chrX:147943327-147944868	1542	chrX:147943131-147943326=147944869-147945051:+	IR-C	14.67	82.05	18.07	88.24	14.63	90.62	15.69	89.36	12.61	83.24	10.34	88.68	11.58	87.1	46.48	15.45	46.24	29.63	47.73	15	60.71	12.07	73.33	22.54	50.52	11.86	58.56	19.05	61.11	7.91	44.62	11.34	55.22	22.96	40	13.51	42.86	10.84	44.62	17.17	32.31	14.29	43.59	7.37
FNBP1	HsaINT0065315	chr9:129890547-129895837	5291	chr9:129895838-129895996=129887187-129890546:-	IR-C	16.28	37.78	14.29	63.64	14.58	35.59	23.4	52	11.39	29.41	12.33	33.33	21.01	45	25.23	20.55	18.75	8.86	36.36	15.79	22.86	17.76	20.93	17.39	14.89	8.89	27.27	21.43	15.56	17.33	41.67	2.54	10.94	6.25	12.98	7.19	14.29	6.12	6.87	9.22	15.62	7.25	12.38	8.03
FNBP1L	HsaINT0065338	chr1:93551106-93552408	1303	chr1:93550947-93551105=93552409-93554661:+	IR-S	46.1	76.99	50.13	62.26	45.8	67.97	49.85	71.27	44.62	62.96	55.84	60.87	53.81	80	55.49	32.87	62.61	27.27	57.6	30.09	57.65	28.14	59.24	35.55	41.46	28.68	53.19	37.57	60.69	25.47	60.67	12.65	39.88	16.79	36.67	13.08	29.71	12.2	32.1	12.82	32.7	12.24	38.11	10.15
FNBP4	HsaINT0065342	chr11:47731562-47732536	975	chr11:47732537-47732670=47731374-47731561:-	IR-S	26.32	95.45	32.43	91.51	38.18	95.85	43.66	98.05	48.94	95.79	47.54	96.93	45.21	96.65	51.94	83.58	94.14	67.38	95.16	48.57	86.85	32.88	88.41	54.95	85.54	53.66	89.9	63.01	92.65	63.2	89.8	53.09	79.78	60.47	86	50.65	80.82	53.25	88.41	72	71.68	58.21	88.73	55.22
FNBP4	HsaINT0065343	chr11:47724779-47731373	6595	chr11:47731374-47731561=47724468-47724778:-	IR-S	23.91	53.27	21.93	59.59	16.35	55.81	10.15	49.07	26.59	57.34	29.9	57.76	17.6	54.27	32.66	24.88	50.03	24.41	56.73	27.41	54.29	26.13	47.21	30.99	52.91	25.5	53.53	27.18	40.79	22.71	47.97	29.9	52.25	19.52	48.2	37.07	45.24	29.48	53.62	31.58	46.97	32.12	44.07	49.56
FOXJ3	HsaINT0065597	chr1:42182025-42188736	6712	chr1:42188737-42188928=42181917-42182024:-	IR-S	9.09	13.73	0	33.33	4.55	38.46	6.38	29.03	4.35	56	13.64	28.21	3.53	36	8.93	30	31.25	25	23.33	17.86	24.71	13.33	25.58	20.93	29.73	12.12	32.08	25.64	26.32	16.67	38.27	18.03	44.44	8.57	14.29	15.25	9.09	15.38	17.65	12.2	27.27	0	15	15.25
FOXJ3	HsaINT0065606	chr1:42189405-42191302	1898	chr1:42191303-42191719=42189303-42189404:-	IR-S	5.26	26.67	17.07	39.39	14.29	44.26	12.31	57.14	13.21	67.44	19.1	34.55	11.9	24.32	15.62	44.35	69.23	53.85	73.77	57.89	68.75	30.34	76	30.12	44.83	25.27	71.43	45.65	69.23	61.11	82.09	18	41.94	28.95	26.67	26.19	20	20	36.36	26.32	20	17.53	44.83	17.89
FOXRED1	HsaINT0065743	chr11:126269292-126271436	2145	chr11:126269160-126269291=126271437-126271657:+	IR-C	9.18	55.4	4.35	32.89	10.23	56.39	13.78	59.73	7.29	47.62	7.92	51.11	10.86	62.9	11.54	23.08	50	26.92	49.37	20	52.13	15.18	48.91	25.93	54.81	17.54	51.27	22.05	48.57	31.28	43.56	26.06	49.48	33.33	43.79	34.5	42.31	31.43	44.74	25.79	58.38	22.37	57.14	25.93
FOXRED1	HsaINT0065748	chr11:126275022-126275326	305	chr11:126274927-126275021=126275327-126275428:+	IR-S	9.28	45.74	5.98	53.85	2.7	60.94	4.96	67.14	6.67	60	8.53	52.73	11.29	42.86	8.7	30.23	69.23	30.69	68.81	31.65	70.26	34.02	74.47	33.33	57.48	22.22	68.33	16.83	61.17	26.67	64.44	13.64	37.93	23.29	38.67	31.15	51.61	20	61.54	14.29	40.74	9.62	35.14	8.33
FPGS	HsaINT0065761	chr9:127803405-127804284	880	chr9:127803229-127803404=127804285-127804413:+	IR-C	10	72.41	0	58.97	18.18	70	5.88	52.38	38.46	65.22	4.76	55.17	9.09	75	21.43	15.79	63.64	20	67.74	33.33	51.9	15.79	61.7	0	62.96	28	50.68	25	73.91	20	68.75	18.18	71.93	25.58	61.76	20	56.86	20	72.09	40.74	44.93	33.33	58.06	30.23
FRA10AC1	HsaINT0065786	chr10:93670849-93676652	5804	chr10:93676653-93676691=93670770-93670848:-	IR-S	0	54.22	15.35	59.84	6.87	52.89	6.23	48.92	3.71	50.1	16.58	65.73	8.79	58.12	18.33	20.99	55.85	28.13	9.97	15.64	41.44	6.87	9.97	13.39	9.97	9.64	42.69	13.49	6.38	17.63	32.94	0	12.86	0	0	6.07	4.69	11.7	0	5.71	7.45	0	3.29	30.69
FRA10AC1	HsaINT0065793	chr10:93687450-93692008	4559	chr10:93692009-93692093=93687404-93687449:-	IR-C	2.86	40	3.23	23.08	3.7	34.88	14.29	24.14	6.25	71.43	12	38.89	1.96	26.67	9.8	11.11	42.86	30	66.67	23.08	63.64	12	50	6.67	77.78	7.14	25	13.51	57.14	15	100	0	17.65	0	38.46	10	27.27	9.09	42.86	0	23.08	4	27.27	0
FRMD4A	HsaINT0065984	chr10:13707114-13737843	30730	chr10:13737844-13737930=13707037-13707113:-	IR-S	11.11	33.33	36.84	7.69	9.68	40.74	5.88	16.67	5.45	21.43	11.11	46.67	9.68	40	18.52	11.11	20	3.7	22.22	2.86	14.29	18.03	17.65	4	4.76	16.13	0	0	12	4.35	11.11	4.76	14.29	1.49	3.45	5.15	2.86	4	16.13	0	3.03	0.75	6.67	3.03
FRMD4A	HsaINT0065997	chr10:13647036-13651902	4867	chr10:13651903-13651974=13643706-13647035:-	IR-C	42.86	100	0	91.3	66.67	81.82	100	100	100	58.82	100	100	100	100	100	52	72.41	40	55.56	20	60	21.31	53.85	38.46	70	21.74	54.55	38.46	84	27.27	63.64	14.29	45.76	12.8	20.97	16.54	26.92	6.42	39.68	12.68	35.71	11.45	37.7	7.89
FSD1	HsaINT0066319	chr19:4310597-4311841	1245	chr19:4310475-4310596=4311842-4312051:+	IR-C	13.3	80.31	14.79	73.82	12.66	75.18	14.07	83.33	14.29	81.94	10.86	82.69	15.58	76.24	17.16	32	83.95	21.74	77.36	27.06	74.51	26.51	84.19	29.63	68.27	18.63	72.78	27.94	76.7	25.64	72.28	15.73	57.71	19.58	57.75	19.56	57.59	21.46	57.45	18.41	59	14.33	58.1	14.85
FTSJ1	HsaINT0066474	chrX:48482795-48482985	191	chrX:48482597-48482794=48482986-48483027:+	IR-S	29.73	46.15	37.19	59.22	24.82	54.24	43.06	56.86	27.82	40.16	44.23	53.19	26.4	51.85	35.65	28.95	50	21.35	46.24	23.89	46.15	23.33	50.82	22.22	36.43	22.89	41.28	21.84	44.58	23.68	43.28	34.35	43.84	29.31	29.41	29.25	32.74	36.69	46.67	21.43	36.97	28.92	42.37	30.77
FTSJ1	HsaINT0066476	chrX:48476669-48477960	1292	chrX:48476563-48476668=48477961-48478168:+	IR-C	18.32	57.38	11.86	72.27	29.57	68.58	0	78.69	8.77	100	28.52	75.64	0	25.18	40.23	100	36.97	33.33	14.29	26.97	49.32	47.3	81.36	16.13	74.63	6.67	31.32	11.86	86.46	0	45.64	61.48	75.16	40.23	45.55	0	55.4	100	100	0	88.07	36.2	73.77	35.8
FUBP1	HsaINT0066540	chr1:77948775-77949154	380	chr1:77949155-77949300=77947906-77948774:-	IR-S	5.05	63.87	5.07	68.33	3.99	64.39	4.18	76.36	6.64	78.22	9.04	71.43	4.93	57.96	9.7	31.13	61.27	20.97	54.48	12.43	53.09	10.58	53	12.5	47.96	13.04	46.88	16.41	65.22	18.34	55.71	7.4	27.72	8.06	19.72	10.76	20.28	10.92	33.33	6.93	25.53	5.81	34.67	9.58
FUK	HsaINT0066592	chr16:70475768-70478271	2504	chr16:70475648-70475767=70478272-70478459:+	IR-S	0	76.92	4.35	60.66	0	64.52	0	68.63	0	70.27	6.67	70.83	7.69	61.64	0	7.69	68.7	9.09	70.87	14.29	64.42	25	61.4	36.84	67.35	10	54.43	0	78.38	7.14	76.32	16.13	54.67	55.56	63.38	30	50.59	18.18	63.64	15.79	57.65	0	60.36	12
FUK	HsaINT0066599	chr16:70466955-70467373	419	chr16:70466882-70466954=70467374-70467471:+	IR-S	25	82.61	0	84	20	100	20	94.87	7.69	91.11	0	80	0	90	14.29	20	77.42	75	90.48	25	91.11	40	94.29	5.88	75	55.56	87.5	0	96.61	37.5	89.09	16.67	76	33.33	84.62	42.86	80.65	16.67	100	50	93.1	0	86.67	40
FXN	HsaINT0066691	chr9:69065036-69099900	34865	chr9:69064938-69065035=69099901-69100178:+	IR-C	42.17	4.17	0	47.68	35.35	23.81	38.46	21.47	47.68	25.15	0	0	23.81	13.51	30.94	19.55	32.71	3.45	2.56	19.63	20.15	0	0	26.72	17.95	23.81	43.97	37.37	26.72	18.72	42.92	52.24	0	0	34.96	0	0	0	0	59.32	52.24	7.69	0	0
G6PC3	HsaINT0066925	chr17:44071243-44074159	2917	chr17:44070730-44071242=44074160-44074266:+	IR-C	2.7	77.78	18.52	57.89	13.04	66.67	4	100	16.67	68.42	9.09	100	7.14	80	7.69	47.37	76.47	26.32	54.55	50	68.42	25.93	62.5	18.52	100	29.41	100	28.57	37.5	60	44	36.36	69.23	50	33.33	17.65	42.86	33.33	58.33	28.57	48.15	20	69.23	23.81
GAA	HsaINT0066942	chr17:80101626-80101810	185	chr17:80101556-80101625=80101811-80101890:+	IR-C	23.94	35.66	24.53	27.64	13.4	17.31	9.59	13.81	10.81	16.39	13.51	30.18	10.28	20	6.67	13.66	16.03	24.47	28.97	13.51	18.78	22.73	26.7	18.29	26.92	36.22	33.73	20.83	20.89	13.79	17.39	36.63	34.62	44.06	53.31	33.33	37.84	31.62	46.23	39.57	41.07	64.91	56.52	35.35
[truncated: 2,464 more rows]
[truncated: 403 more columns]

## Sheet: Supplemental_Table_S3
GENE	EVENT	COORD	LENGTH	FullCO	COMPLEX	0_MUT3_cyto	0_MUT3_nuc	0_MUT4_cyto	0_MUT4_nuc	0_CTRL1_cyto	0_CTRL1_nuc	0_CTRL3_cyto	0_CTRL3_nuc	0_CTRL4_cyto	0_CTRL4_nuc	0_CTRL5_cyto	0_CTRL5_nuc	0_MUT1_cyto	0_MUT1_nuc	0_MUT2_cyto	14_MUT3_cyto	14_MUT3_nuc	14_MUT4_cyto	14_MUT4_nuc	14_CTRL1_cyto	14_CTRL1_nuc	14_CTRL3_cyto	14_CTRL3_nuc	14_CTRL4_cyto	14_CTRL4_nuc	14_CTRL5_cyto	14_CTRL5_nuc	14_MUT1_cyto	14_MUT1_nuc	14_MUT2_cyto	14_MUT2_nuc	22_MUT3_cyto	22_MUT3_nuc	22_MUT4_cyto	22_MUT4_nuc	22_CTRL1_cyto	22_CTRL1_nuc	22_CTRL3_cyto	22_CTRL3_nuc	22_CTRL4_cyto	22_CTRL4_nuc	22_CTRL5_cyto	22_CTRL5_nuc	22_MUT1_cyto
[truncated: 4,490 more rows]
[truncated: 403 more columns]

[truncated: 32 more sheets: Supplemental_Table_S4, Supplemental_Table_S5, Supplemental_Table_S6, Supplemental_Table_S7, Supplemental_Table_S8, Supplemental_Table_S9, Supplemental_Table_S10, Supplemental_Table_S11, Supplemental_Table_S12, Supplemental_Table_S13, Supplemental_Table_S14, Supplemental_Table_S15, Supplemental_Table_S16, Supplemental_Table_S17, Supplemental_Table_S18, Supplemental_Table_S19, Supplemental_Table_S20, Supplemental_Table_S21, Supplemental_Table_S22, Supplemental_Table_S23 …]
